# Supplementary material for: Transcriptomics differentiate two novel bioactive strains of Paenibacillus sp. isolated from the perennial ryegrass seed microbiome
Source: PubMed Central journal article supplement (PMC8324883; doi:10.1038/s41598-021-94820-2), 2021-07-30
Supplement: 41598_2021_94820_MOESM1_ESM.pdf [file 41598_2021_94820_MOESM1_ESM.pdf]

Supplementary Table S1. Summary of reads available for genome assembly

| Strain ID | Yield (bp)<br>Illumina | Yield (bp)<br>ONT | Mean length (bp)<br>ONT | Coverage<br>Illumina | Coverage<br>ONT |
|-----------|------------------------|-------------------|-------------------------|----------------------|-----------------|
| S02       | 1,555,571,650          | 8,073,984,100     | 1,144                   | 256.7×               | 1332.2×         |
| S25       | 981,251,546            | 5,129,702,300     | 5,088                   | 164.7×               | 860.8×          |

Supplementary Table S2. General genomic characteristics of *Paenibacillus* sp. strains S02 and S25

| Strain ID | Genome size (bp) | GC content (%) | No. of tRNA | No. of tmRNA | No. of rRNA | No. of gene | No. of CDS |
|-----------|------------------|----------------|-------------|--------------|-------------|-------------|------------|
| S02       | 6,060,529        | 45.60          | 92          | 1            | 33          | 5,436       | 5,310      |
| S25       | 5,958,851        | 45.72          | 92          | 1            | 36          | 5,306       | 5,177      |

Supplementary Table S4. Plant growth-promoting genes in the genomes of *Paenibacillus* sp. strains S02 and S25, and *P. polymyxa* strain CR1

| Trait                                | Gene Name             | <i>Paenibacillus</i> sp. S02 | <i>Paenibacillus</i> sp. S25 | <i>P. polymyxa</i> CR1 |
|--------------------------------------|-----------------------|------------------------------|------------------------------|------------------------|
| Nitrogen fixation                    |                       |                              |                              |                        |
|                                      | <i>nifB</i>           | KAI36_01039                  | KAI37_00991                  | YP_008910495           |
|                                      | <i>nifH</i>           | KAI36_01040                  | KAI37_00992                  | YP_008910496           |
|                                      | <i>nifD</i>           | KAI36_01041                  | KAI37_00993                  | YP_008910497           |
|                                      | <i>nifK</i>           | KAI36_01042                  | KAI37_00994                  | YP_008910498           |
|                                      | <i>nifE</i>           | KAI36_01043                  | KAI37_00995                  | YP_008910499           |
|                                      | <i>nifN</i>           | KAI36_01044                  | KAI37_00996                  | YP_008910500           |
|                                      | <i>nifX</i>           | KAI36_01045                  | KAI37_00997                  | YP_008910501           |
|                                      | <i>hesA/moeB</i>      | KAI36_01046                  | KAI37_00998                  | YP_008910502           |
|                                      | <i>nifV</i>           | KAI36_01047                  | KAI37_00999                  | YP_008910503           |
| Phosphate solubilization             |                       |                              |                              |                        |
|                                      | <i>gcd</i>            | KAI36_02793                  | KAI37_02644                  | YP_008912273           |
|                                      | <i>gad</i>            | –                            | –                            | –                      |
| Phosphonate cluster ( <i>phn</i> )   |                       |                              |                              |                        |
|                                      | <i>phnA</i>           | KAI36_05309                  | KAI37_05177                  | YP_008914717           |
|                                      | <i>phnB</i>           | KAI36_00880                  | KAI37_00854                  | YP_008910326           |
|                                      | <i>phnC</i>           | KAI36_04607                  | KAI37_04494                  | YP_008913947           |
|                                      | <i>phnD</i>           | KAI36_04606                  | KAI37_04493                  | YP_008913946           |
|                                      | <i>phnE</i>           | KAI36_04608                  | KAI37_04495                  | YP_008913948           |
|                                      | <i>phnW</i>           | KAI36_05275                  | KAI37_05152                  | YP_008914692           |
|                                      | <i>phnX</i>           | KAI36_00485                  | KAI37_00496                  | YP_008909947           |
|                                      | <i>ppd</i>            | KAI36_05276                  | KAI37_05153                  | YP_008914693           |
|                                      | <i>pepM</i>           | KAI36_05277                  | KAI37_05154                  | YP_008914694           |
| Phosphate transporter ( <i>pst</i> ) |                       |                              |                              |                        |
|                                      | <i>pstS</i>           | KAI36_01689                  | KAI37_01595                  | YP_008911198           |
|                                      | <i>pstA</i>           | KAI36_01691                  | KAI37_01597                  | YP_008911200           |
|                                      | <i>pstB</i>           | KAI36_01692                  | KAI37_01598                  | YP_008911201           |
|                                      | <i>pstC</i>           | KAI36_01690                  | KAI37_01596                  | YP_008911199           |
|                                      | <i>phoP</i>           | KAI36_01703                  | KAI37_01609                  | YP_008911212           |
|                                      | <i>phoR</i>           | KAI36_01702                  | KAI37_01608                  | YP_008911211           |
| Indole-3-acetic acid production      |                       |                              |                              |                        |
|                                      | <i>ipdC</i>           | KAI36_01475                  | KAI37_01435                  | YP_008911027           |
|                                      | auxin efflux carriers | KAI36_02845                  | KAI37_02683                  | YP_008912813           |
|                                      |                       | KAI36_03330                  | KAI37_03351                  | YP_008912323           |
|                                      |                       | KAI36_05253                  | KAI37_05129                  | YP_008911849           |

Gene identifiers for *Paenibacillus* sp. strains S02 and S25 were from the annotated genomes described in section 2.2. Gene identifiers for *P. polymyxa* CR1 were from Eastman, et al.<sup>16</sup>

Supplementary Table S5. Percentage identity of plant growth-promoting genes in the genome of strains *Paenibacillus* sp. S02/S25 and *P. polymyxa* CR1

| Trait                                | Gene Name               | S02 VS S25 | S02 VS CR1 | S25 VS CR1 |
|--------------------------------------|-------------------------|------------|------------|------------|
| Nitrogen fixation                    |                         |            |            |            |
|                                      | <i>nifB</i>             | 97.13      | 98.00      | 96.80      |
|                                      | <i>nifH</i>             | 95.39      | 98.15      | 94.69      |
|                                      | <i>nifD</i>             | 98.96      | 98.62      | 98.27      |
|                                      | <i>nifK</i>             | 98.24      | 97.45      | 97.39      |
|                                      | <i>nifE</i>             | 98.24      | 98.60      | 98.16      |
|                                      | <i>nifN</i>             | 97.25      | 97.55      | 97.63      |
|                                      | <i>nifX</i>             | 98.46      | 97.69      | 97.69      |
|                                      | <i>hesA/moeB</i>        | 96.47      | 98.04      | 96.34      |
|                                      | <i>nifV</i>             | 98.50      | 98.59      | 97.80      |
| Phosphate solubilization             |                         |            |            |            |
|                                      | <i>gcd</i>              | 98.11      | 97.60      | 98.39      |
|                                      | <i>gad</i>              | -          | -          | -          |
| Phosphonate cluster ( <i>phn</i> )   |                         |            |            |            |
|                                      | <i>phnA</i>             | 98.53      | 98.53      | 98.82      |
|                                      | <i>phnB</i>             | 98.21      | 98.43      | 99.78      |
|                                      | <i>phnC</i>             | 97.66      | 97.81      | 98.39      |
|                                      | <i>phnD</i>             | 98.14      | 99.07      | 97.63      |
|                                      | <i>phnE</i>             | 98.25      | 97.78      | 97.43      |
|                                      | <i>phnW</i>             | 98.74      | 98.47      | 98.20      |
|                                      | <i>phnX</i>             | 98.04      | 97.92      | 98.81      |
|                                      | <i>ppd</i>              | 98.97      | 98.62      | 98.79      |
|                                      | <i>pepM</i>             | 99.33      | 99.44      | 99.00      |
| Phosphate transporter ( <i>pst</i> ) |                         |            |            |            |
|                                      | <i>pstS</i>             | 98.92      | 98.48      | 99.13      |
|                                      | <i>pstA</i>             | 96.99      | 97.55      | 98.22      |
|                                      | <i>pstB</i>             | 98.81      | 98.70      | 98.22      |
|                                      | <i>pstC</i>             | 99.14      | 98.71      | 98.82      |
|                                      | <i>phoP</i>             | 98.09      | 97.81      | 97.94      |
|                                      | <i>phoR</i>             | 98.28      | 97.45      | 97.89      |
| Indole-3-acetic acid production      |                         |            |            |            |
|                                      | <i>ipdC</i>             | 99.54      | 99.48      | 99.14      |
|                                      | auxin efflux carriers 1 | 99.13      | 98.15      | 98.37      |
|                                      | auxin efflux carriers 2 | 97.92      | 97.60      | 98.85      |
|                                      | auxin efflux carriers 3 | 98.58      | 98.96      | 99.05      |

Supplementary Table S6. Secondary metabolite gene clusters identified in *Paenibacillus* sp. strains S02 and S25

| ID  | Type                         | Location            |                     | Most similar known cluster (similarity) |
|-----|------------------------------|---------------------|---------------------|-----------------------------------------|
|     |                              | S02                 | S25                 |                                         |
| C1  | Nrps                         | 62,712-130,949      | 62,863-131,149      | <b>fusaricidin B (100%)</b>             |
| C2  | siderophore                  | 1,060,830-1,078,231 | 1,021,525-1,038,926 | –                                       |
| C3  | bacteriocin                  | 1,226,685-1,236,921 | 1,163,825-1,174,061 | –                                       |
| C4  | Nrps<br>transAT-PKS          | 1,276,170-1,374,849 | 1,234,262-1,333,113 | –                                       |
| C5  | lassopeptide                 | 1,410,732-1,434,848 | 1,369,083-1,393,199 | paeninodin (40%)                        |
| C6  | Nrps                         | 1,496,857-1,557,694 | 1,452,621-1,513,241 | marthiapeptide A (33%)                  |
| C7  | lanthipeptide                | 1,752,471-1,779,477 | 1,717,117-1,742,305 | <b>paenilan (100%)</b>                  |
| C8  | lanthipeptide                | –                   | 1,865,337-1,891,786 | <b>paenicidin B (71%)</b>               |
| C9  | Nrps-like                    | 2,147,919-2,191,265 | 2,068,326-2,110,857 | –                                       |
| C10 | Nrps                         | 2,564,994-2,657,512 | 2,538,234-2,631,151 | <b>tridecaptin (100%)</b>               |
| C11 | Nrps<br>transAT-PKS          | 2,800,573-2,881,430 | 2,762,852-2,843,624 | paenilipoheptin (S02, 73%; S25, 76%)    |
| C12 | Nrps                         | –                   | 2,847,977-2,929,143 | –                                       |
| C13 | Nrps<br>betalactone          | –                   | 3,004,139-3,056,727 | –                                       |
| C14 | Nrps<br>T3PKS<br>transAT-PKS | 3,755,116-3,856,856 | 3,756,437-3,858,120 | aurantinin B/C/D (35%)                  |
| C15 | Nrps                         | 5,189,939-5,270,981 | 5,092,876-5,173,931 | <b>polymyxin (100%)</b>                 |
| C16 | phosphonate                  | 5,879,383-5,920,282 | 5,775,191-5,816,090 | –                                       |

Nrps: Nonribosomal peptide synthetase

transAT-PKS: transAT-polyketide synthase

T3PKS: Type III polyketide synthase

Clusters in bold: Known antimicrobial compounds

Supplementary Table S7. The average colony diameter ( $\pm$  standard error) of fungal pathogens when exposed to the two *Paenibacillus* sp. strains (S02 and S25) in a bioprotection assay (*in vitro*)

| Pathogen ID                       | S02/cm                       | S25/cm                       | Blank/cm                     |
|-----------------------------------|------------------------------|------------------------------|------------------------------|
| <i>Colletotrichum graminicola</i> | 1.03 $\pm$ 0.02 <sup>b</sup> | 3.77 $\pm$ 0.04 <sup>a</sup> | 4.10 $\pm$ 0.20 <sup>a</sup> |
| <i>Fusarium verticillioides</i>   | 2.93 $\pm$ 0.04 <sup>c</sup> | 6.15 $\pm$ 0.14 <sup>b</sup> | 6.80 $\pm$ 0.08 <sup>a</sup> |
| <i>Microdochium nivale</i>        | 5.12 $\pm$ 0.11 <sup>a</sup> | 5.18 $\pm$ 0.12 <sup>a</sup> | 5.27 $\pm$ 0.04 <sup>a</sup> |

<sup>a, b, c</sup>: Different letters are statistically significantly ( $P < 0.05$ ) different.

S02/S25: *Paenibacillus* sp. strains

Supplementary Table S8. The percentage of mapped reads when quantifying transcript of each sample using the transcriptome sequences of *F. verticillioides* 7600 as the reference

| Sample        | No. of mapped reads | Mapping rate |
|---------------|---------------------|--------------|
| S02_ctrl_1    | 4                   | too low      |
| S02_ctrl_2    | 1                   | too low      |
| S02_ctrl_3    | 2                   | too low      |
| S02_treated_1 | 3                   | too low      |
| S02_treated_2 | 1,492               | 0.0082%      |
| S02_treated_3 | 1,366               | 0.0089%      |
| S25_ctrl_1    | 1                   | too low      |
| S02_ctrl_2    | 0                   | 0%           |
| S02_ctrl_3    | 0                   | 0%           |
| S25_treated_1 | 33,944              | 0.2817%      |
| S25_treated_2 | 17,987              | 0.1407%      |
| S25_treated_3 | 22,684              | 0.1395%      |

too low: 0–0.0001%; ctrl: Without *F. verticillioides*; treated: With *F. verticillioides*  
 S02/S25: *Paenibacillus* sp. strains isolated in this study

Supplementary Table S9. Pathogens used in the *in vitro* bioprotection assay.

| VPRI Acc. No. | Taxonomic Details                 | Host Taxonomic Details       | State | Collection Date |
|---------------|-----------------------------------|------------------------------|-------|-----------------|
| 32315         | <i>Colletotrichum graminicola</i> | <i>Cynosurus echinatus</i> . | Vic.  | 27-Apr-05       |
| 42586a        | <i>Fusarium verticillioides</i>   | <i>Zea mays</i> L.           | Vic.  | 27-Feb-15       |
| 43403         | <i>Microdochium nivale</i>        | <i>Lolium perenne</i>        | Vic.  | 11-Nov-17       |

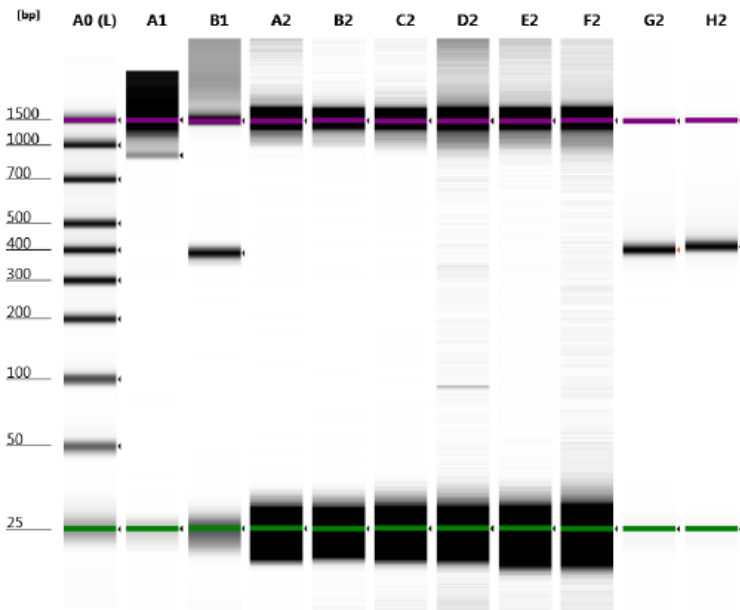

Supplementary Figure S1. Amplicons of the expected size (~ 400 bp) were produced using the DNA extracted from two (G2 and H2) of eight replicates of the  $10^{-2}$  dilution (A2–H2). Results of the  $10^{-3}$  dilutions were not shown since no amplicon was produced. A0: DNA ladder; A1: No template control; B1: Positive control, *Rhizobium leguminosarum* bv. *trifolii* WSM1325 DNA

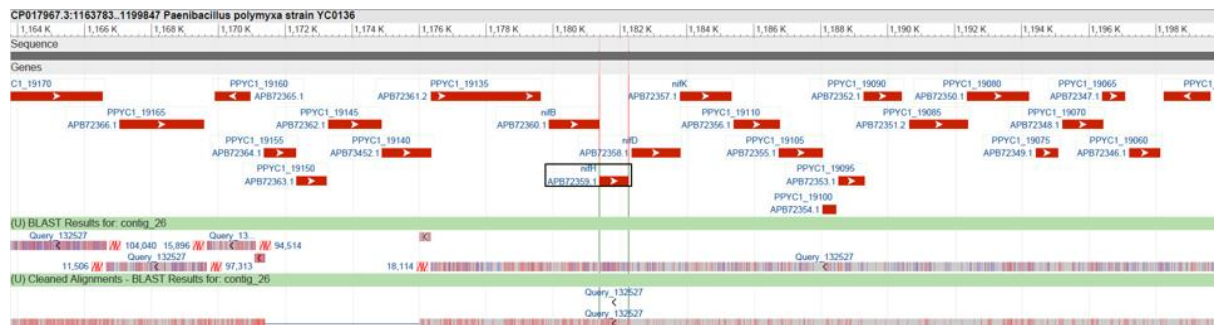

Supplementary Figure S2. A single 110 Kb read containing the entire *P. polymyxa nif* operon (nine genes) of *P. polymyxa* YC0136 identified via BLAST analyses. The *nifH* gene was highlighted.

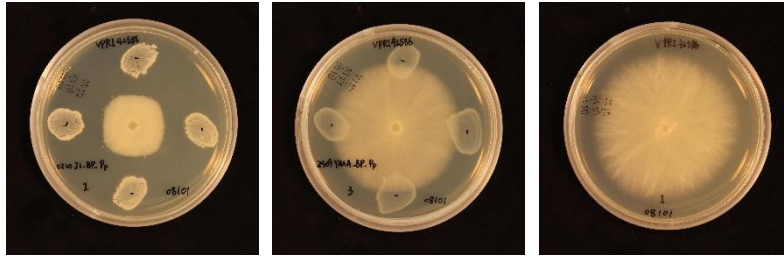

Supplementary Figure S3. Representative images of the in vitro bioprotection assay when challenging strain S02 (left) and S25 (middle) with *Fusarium verticillioides*. The control plate (pathogen-only) was shown on the right.

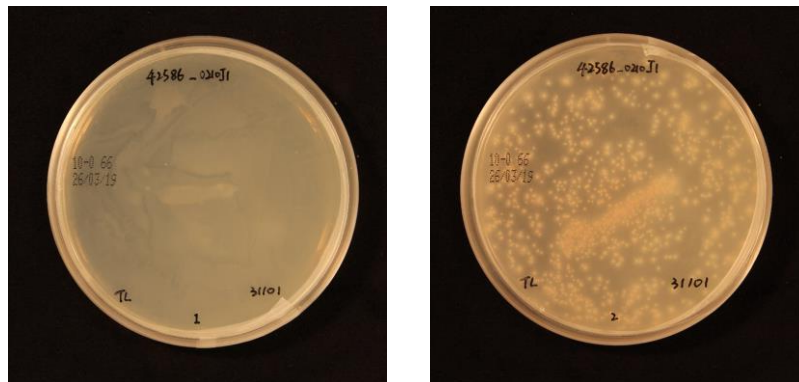

Supplementary Figure S4. Images of Potato Dextrose Agar plates containing samples of *Paenibacillus* sp. S02 co-incubated *F. verticillioides* (six hours). The first biological replicate (S02\_treated\_1, left) showed no visual growth of the pathogen, and only had three mapped fungal reads. The second biological replicate (S02\_treated\_2, right) had 1,492 mapped fungal reads.
