# Supplementary material for: Transcriptomics differentiate two novel bioactive strains of Paenibacillus sp. isolated from the perennial ryegrass seed microbiome
Source: Sci Rep. 2021 Jul 30;11:15545. doi: 10.1038/s41598-021-94820-2 (PMC8324883; doi:10.1038/s41598-021-94820-2)
Supplement: Supplementary file 2 — Supplementary Information 2. [file 41598_2021_94820_MOESM2_ESM.xlsx]

## Sheet: ANI
Supplementary Table S3a. The average nucleotide identities between the two isolated strains (S02 and S25) and 44 know P. polymyxa strains
	P. polymyxa M1	P. polymyxa YUPP-8	P. polymyxa DSM 365	P. polymyxa J	P. polymyxa TD94	P. polymyxa E681	P. polymyxa NCTC4744	P. polymyxa OSY-DF	P. polymyxa YC0573	P. polymyxa YC0136	P. polymyxa EBL06	P. polymyxa NCTC10343	P. polymyxa WLY78	P. polymyxa ZF129	P. polymyxa CICC 10580	P. polymyxa KP10	P. polymyxa CFSAN034343	P. polymyxa UBA3557	P. polymyxa CF05	P. polymyxa 1-43	P. polymyxa ATCC 15970	Paenibacillus sp. S02	P. polymyxa CCI-25	P. polymyxa NCTC7575	P. polymyxa KCCM 40454	P. polymyxa DSM292	P. polymyxa CFSAN034342	P. polymyxa Sb3-1	P. polymyxa PIC73	P. polymyxa TF07-21-d	P. polymyxa HY96-2	P. polymyxa CR1	P. polymyxa TH2H2	P. polymyxa SQR21	P. polymyxa A18	P. polymyxa ND25	P. polymyxa LY214	P. polymyxa KF-1	P. polymyxa NRRL B-30509	P. polymyxa ND24	P. polymyxa DCB2-2	P. polymyxa ZF197	P. polymyxa SC2	P. polymyxa CFSAN034341	P. polymyxa ATCC 842	Paenibacillus sp. S25
P. polymyxa M1	1	0.902896	0.904758	0.902912	0.901943	0.901551	0.822535	0.948258	0.902132	0.902385	0.947947	0.949386	0.904854	0.950512	0.947935	0.948226	0.901912	0.947567	0.948543	0.988021	0.902529	0.902272	0.901979	0.950436	0.949794	0.901854	0.902108	0.986898	0.983794	0.948229	0.948256	0.902033	0.947062	0.948156	0.949045	0.984482	0.901637	0.985051	0.949984	0.92928	0.949975	0.930682	0.998881	0.904603	0.949108	0.901314
P. polymyxa YUPP-8	0.902896	1	0.955434	0.96883	0.966259	0.962121	0.859445	0.902008	0.964575	0.96241	0.902134	0.901721	0.953213	0.902059	0.902032	0.90187	0.964611	0.900943	0.902293	0.90294	0.964765	0.964628	0.968924	0.902101	0.901951	0.964755	0.964839	0.903091	0.901844	0.90165	0.902199	0.964306	0.902141	0.901901	0.90151	0.902911	0.964512	0.903332	0.901736	0.892944	0.902068	0.893481	0.903006	0.953252	0.90171	0.961766
P. polymyxa DSM 365	0.904758	0.955434	1	0.957176	0.95565	0.953239	0.867326	0.902605	0.954694	0.953868	0.903189	0.902563	0.982128	0.903396	0.902795	0.902753	0.955049	0.901405	0.902858	0.905075	0.954881	0.954782	0.958146	0.902466	0.902282	0.954877	0.955115	0.905973	0.904142	0.902612	0.903063	0.954881	0.902385	0.902686	0.902422	0.904698	0.95456	0.905328	0.902211	0.89276	0.90335	0.89446	0.904787	0.979686	0.90256	0.953252
P. polymyxa J	0.902912	0.96883	0.957176	1	0.962361	0.96005	0.88267	0.90082	0.962459	0.960283	0.901076	0.901469	0.952594	0.901373	0.901292	0.900739	0.962334	0.899525	0.901142	0.901935	0.963116	0.961963	0.989219	0.901501	0.900637	0.962855	0.963377	0.903043	0.900769	0.90074	0.901508	0.962652	0.901174	0.901673	0.900385	0.901731	0.962357	0.902315	0.900686	0.892256	0.90065	0.893993	0.902915	0.95234	0.900717	0.959218
P. polymyxa TD94	0.901943	0.966259	0.95565	0.962361	1	0.967671	0.868245	0.901405	0.975697	0.977725	0.902327	0.901915	0.95494	0.9022	0.902128	0.902155	0.975339	0.900885	0.902227	0.901839	0.975032	0.98107	0.962461	0.902075	0.901187	0.975077	0.975602	0.902933	0.901509	0.901772	0.90211	0.975308	0.901589	0.902236	0.901275	0.901898	0.975665	0.903004	0.901381	0.892252	0.902109	0.893175	0.902189	0.954399	0.901877	0.977033
P. polymyxa E681	0.901551	0.962121	0.953239	0.96005	0.967671	1	0.840437	0.899627	0.966814	0.966339	0.899695	0.900411	0.952367	0.900322	0.900548	0.899566	0.966701	0.898796	0.900514	0.900847	0.966773	0.968045	0.960071	0.900402	0.899884	0.966612	0.96674	0.901908	0.899727	0.899851	0.900447	0.966584	0.899913	0.900568	0.89982	0.900629	0.966778	0.900923	0.900217	0.892039	0.899855	0.893624	0.901438	0.952497	0.899799	0.966235
P. polymyxa NCTC4744	0.822535	0.859445	0.867326	0.88267	0.868245	0.840437	1	0.842155	0.848924	0.842362	0.799778	0.837221	0.831942	0.835443	0.825289	0.838051	0.855326	0.830649	0.83973	0.83121	0.85893	0.852037	0.842658	0.820758	0.824532	0.844418	0.868861	0.815031	0.850799	0.821713	0.825532	0.857749	0.821394	0.83973	0.818996	0.811144	0.837945	0.805426	0.824112	0.825405	0.837999	0.841434	0.811094	0.835775	0.830891	0.840238
P. polymyxa OSY-DF	0.948258	0.902008	0.902605	0.90082	0.901405	0.899627	0.842155	1	0.900802	0.900429	0.988909	0.98449	0.902403	0.985027	0.98755	0.984528	0.900872	0.987639	0.987288	0.948561	0.900678	0.9005	0.900926	0.984177	0.984226	0.900735	0.901258	0.94915	0.94733	0.987181	0.988869	0.900425	0.987599	0.987224	0.985555	0.948874	0.901064	0.948269	0.98405	0.924203	0.984745	0.925194	0.948468	0.902233	0.984485	0.899621
P. polymyxa YC0573	0.902132	0.964575	0.954694	0.962459	0.975697	0.966814	0.848924	0.900802	1	0.974921	0.902013	0.901955	0.953735	0.902294	0.902424	0.901607	0.989867	0.90056	0.90246	0.90141	0.989553	0.976592	0.962541	0.902028	0.900743	0.98959	0.990109	0.90345	0.900881	0.901546	0.902564	0.989277	0.901282	0.902457	0.900703	0.901236	0.997242	0.902508	0.900729	0.891582	0.901592	0.893283	0.902362	0.953394	0.901213	0.974444
P. polymyxa YC0136	0.902385	0.96241	0.953868	0.960283	0.977725	0.966339	0.842362	0.900429	0.974921	1	0.90035	0.901231	0.952975	0.900999	0.901163	0.900314	0.974485	0.899546	0.900811	0.901505	0.974667	0.978088	0.960693	0.90104	0.900328	0.974538	0.974934	0.902331	0.90057	0.900483	0.901056	0.974649	0.900596	0.901318	0.900119	0.901637	0.97471	0.901568	0.901236	0.891827	0.900388	0.893568	0.902342	0.952753	0.90042	0.992851
P. polymyxa EBL06	0.947947	0.902134	0.903189	0.901076	0.902327	0.899695	0.799778	0.988909	0.902013	0.90035	1	0.985967	0.903137	0.985015	0.988923	0.985774	0.901943	0.99083	0.988977	0.948067	0.901665	0.900605	0.901091	0.985058	0.984526	0.901681	0.902026	0.949085	0.947525	0.987216	0.996189	0.901477	0.989894	0.988035	0.985939	0.948483	0.901595	0.948376	0.984669	0.924216	0.985037	0.925235	0.947986	0.902692	0.985987	0.899835
P. polymyxa NCTC10343	0.949386	0.901721	0.902563	0.901469	0.901915	0.900411	0.837221	0.98449	0.901955	0.901231	0.985967	1	0.902501	0.983628	0.985461	0.983885	0.901197	0.985414	0.985146	0.949218	0.902147	0.900656	0.900595	0.982684	0.984036	0.901396	0.901583	0.950524	0.948342	0.985395	0.986015	0.901547	0.985163	0.98483	0.984596	0.949805	0.900571	0.949577	0.982977	0.92438	0.983362	0.925626	0.94941	0.902251	0.999872	0.900153
P. polymyxa WLY78	0.904854	0.953213	0.982128	0.952594	0.95494	0.952367	0.831942	0.902403	0.953735	0.952975	0.903137	0.902501	1	0.903038	0.902779	0.902815	0.952487	0.901361	0.902766	0.904873	0.953307	0.953716	0.952629	0.902825	0.902007	0.953291	0.953928	0.905574	0.904255	0.902634	0.90315	0.953332	0.902454	0.902908	0.902194	0.90425	0.953499	0.905266	0.90235	0.893066	0.902994	0.894269	0.904857	0.9882	0.902544	0.952177
P. polymyxa ZF129	0.950512	0.902059	0.903396	0.901373	0.9022	0.900322	0.835443	0.985027	0.902294	0.900999	0.985015	0.983628	0.903038	1	0.984408	0.984094	0.901949	0.984729	0.984096	0.950552	0.902443	0.901054	0.900819	0.985253	0.983408	0.90178	0.902148	0.951366	0.949609	0.984494	0.984817	0.901848	0.984456	0.984129	0.984985	0.95083	0.901406	0.950416	0.98422	0.924701	0.999831	0.926051	0.950504	0.903241	0.983574	0.90038
P. polymyxa CICC 10580	0.947935	0.902032	0.902795	0.901292	0.902128	0.900548	0.825289	0.98755	0.902424	0.901163	0.988923	0.985461	0.902779	0.984408	1	0.985139	0.901793	0.988493	0.988823	0.947938	0.902437	0.901029	0.900969	0.984421	0.984258	0.901851	0.902119	0.948807	0.9471	0.987653	0.988916	0.901699	0.988851	0.988524	0.985532	0.948275	0.901293	0.948107	0.98378	0.924159	0.984325	0.925351	0.948013	0.902528	0.985412	0.900148
P. polymyxa KP10	0.948226	0.90187	0.902753	0.900739	0.902155	0.899566	0.838051	0.984528	0.901607	0.900314	0.985774	0.983885	0.902815	0.984094	0.985139	1	0.901724	0.985439	0.985457	0.948561	0.901399	0.900418	0.900642	0.984655	0.982456	0.901417	0.902008	0.949473	0.94792	0.984587	0.98568	0.901121	0.985439	0.985503	0.984056	0.949132	0.900828	0.948873	0.983108	0.924071	0.984074	0.925101	0.948263	0.902428	0.983923	0.899643
P. polymyxa CFSAN034343	0.901912	0.964611	0.955049	0.962334	0.975339	0.966701	0.855326	0.900872	0.989867	0.974485	0.901943	0.901197	0.952487	0.901949	0.901793	0.901724	1	0.900421	0.902102	0.901829	0.990334	0.976292	0.962826	0.901545	0.900893	0.990377	0.992061	0.902909	0.901197	0.90157	0.90193	0.990022	0.901281	0.902056	0.900866	0.9016	0.989872	0.902697	0.901022	0.891715	0.901884	0.892661	0.901983	0.953775	0.901195	0.973644
P. polymyxa UBA3557	0.947567	0.900943	0.901405	0.899525	0.900885	0.898796	0.830649	0.987639	0.90056	0.899546	0.99083	0.985414	0.901361	0.984729	0.988493	0.985439	0.900421	1	0.988394	0.947635	0.900126	0.899462	0.899482	0.985067	0.984292	0.900085	0.900637	0.948414	0.946848	0.986519	0.990786	0.899786	0.988808	0.988149	0.985514	0.948314	0.900446	0.947871	0.984308	0.923758	0.984722	0.924514	0.947625	0.900878	0.985388	0.89896
P. polymyxa CF05	0.948543	0.902293	0.902858	0.901142	0.902227	0.900514	0.83973	0.987288	0.90246	0.900811	0.988977	0.985146	0.902766	0.984096	0.988823	0.985457	0.902102	0.988394	1	0.948176	0.902458	0.901333	0.901109	0.983616	0.983965	0.901972	0.902305	0.948981	0.947375	0.988426	0.988456	0.902094	0.989728	0.996925	0.985223	0.948634	0.901687	0.948385	0.983775	0.924027	0.984141	0.925553	0.948545	0.90241	0.985178	0.900205
P. polymyxa 1-43	0.988021	0.90294	0.905075	0.901935	0.901839	0.900847	0.83121	0.948561	0.90141	0.901505	0.948067	0.949218	0.904873	0.950552	0.947938	0.948561	0.901829	0.947635	0.948176	1	0.901859	0.901626	0.902009	0.95058	0.949885	0.901911	0.901915	0.985797	0.984561	0.948541	0.948218	0.901204	0.947871	0.948116	0.949336	0.984641	0.901686	0.985118	0.95033	0.929682	0.950399	0.930671	0.987325	0.904711	0.949285	0.900556
P. polymyxa ATCC 15970	0.902529	0.964765	0.954881	0.963116	0.975032	0.966773	0.85893	0.900678	0.989553	0.974667	0.901665	0.902147	0.953307	0.902443	0.902437	0.901399	0.990334	0.900126	0.902458	0.901859	1	0.976372	0.963003	0.902283	0.900612	0.99958	0.992032	0.903574	0.901285	0.901474	0.902177	0.989819	0.901121	0.902533	0.900672	0.90171	0.989373	0.902733	0.900919	0.89172	0.901688	0.893374	0.902565	0.953516	0.901345	0.973756
Paenibacillus sp. S02	0.902272	0.964628	0.954782	0.961963	0.98107	0.968045	0.852037	0.9005	0.976592	0.978088	0.900605	0.900656	0.953716	0.901054	0.901029	0.900418	0.976292	0.899462	0.901333	0.901626	0.976372	1	0.961955	0.901214	0.900276	0.976285	0.976632	0.9026	0.900501	0.900457	0.901345	0.976107	0.900761	0.901226	0.900378	0.901254	0.977226	0.901783	0.900584	0.891729	0.900371	0.893543	0.902448	0.953412	0.900061	0.977781
P. polymyxa CCI-25	0.901979	0.968924	0.958146	0.989219	0.962461	0.960071	0.842658	0.900926	0.962541	0.960693	0.901091	0.900595	0.952629	0.900819	0.900969	0.900642	0.962826	0.899482	0.901109	0.902009	0.963003	0.961955	1	0.90098	0.900508	0.963047	0.963437	0.902313	0.900706	0.900642	0.901457	0.962819	0.901197	0.901098	0.900685	0.902031	0.962622	0.902286	0.900967	0.892539	0.900734	0.893832	0.902268	0.952533	0.90045	0.959786
P. polymyxa NCTC7575	0.950436	0.902101	0.902466	0.901501	0.902075	0.900402	0.820758	0.984177	0.902028	0.90104	0.985058	0.982684	0.902825	0.985253	0.984421	0.984655	0.901545	0.985067	0.983616	0.95058	0.902283	0.901214	0.90098	1	0.982708	0.901579	0.901889	0.951728	0.949552	0.984354	0.984774	0.901782	0.984553	0.98355	0.984955	0.950306	0.900877	0.950759	0.987493	0.924716	0.984782	0.925899	0.95084	0.902577	0.982714	0.900475
P. polymyxa KCCM 40454	0.949794	0.901951	0.902282	0.900637	0.901187	0.899884	0.824532	0.984226	0.900743	0.900328	0.984526	0.984036	0.902007	0.983408	0.984258	0.982456	0.900893	0.984292	0.983965	0.949885	0.900612	0.900276	0.900508	0.982708	1	0.900545	0.900922	0.950473	0.94898	0.984526	0.984484	0.900093	0.984023	0.983793	0.985046	0.950304	0.900807	0.949877	0.983503	0.924802	0.983472	0.925437	0.949669	0.901546	0.984282	0.899583
P. polymyxa DSM292	0.901854	0.964755	0.954877	0.962855	0.975077	0.966612	0.844418	0.900735	0.98959	0.974538	0.901681	0.901396	0.953291	0.90178	0.901851	0.901417	0.990377	0.900085	0.901972	0.901911	0.99958	0.976285	0.963047	0.901579	0.900545	1	0.992047	0.903115	0.901358	0.901482	0.901692	0.989859	0.901126	0.902025	0.900701	0.901756	0.989427	0.902745	0.901003	0.891835	0.901737	0.892865	0.902004	0.953577	0.901414	0.973779
P. polymyxa CFSAN034342	0.902108	0.964839	0.955115	0.963377	0.975602	0.96674	0.868861	0.901258	0.990109	0.974934	0.902026	0.901583	0.953928	0.902148	0.902119	0.902008	0.992061	0.900637	0.902305	0.901915	0.992032	0.976632	0.963437	0.901889	0.900922	0.992047	1	0.90312	0.901615	0.901827	0.902031	0.989839	0.901528	0.902275	0.901237	0.902085	0.989709	0.903129	0.901266	0.891831	0.902259	0.892907	0.902205	0.954133	0.901687	0.974571
P. polymyxa Sb3-1	0.986898	0.903091	0.905973	0.903043	0.902933	0.901908	0.815031	0.94915	0.90345	0.902331	0.949085	0.950524	0.905574	0.951366	0.948807	0.949473	0.902909	0.948414	0.948981	0.985797	0.903574	0.9026	0.902313	0.951728	0.950473	0.903115	0.90312	1	0.98405	0.949334	0.949089	0.90275	0.948289	0.948853	0.950046	0.984241	0.902091	0.985503	0.950947	0.929814	0.951215	0.930914	0.986997	0.905289	0.950137	0.901567
P. polymyxa PIC73	0.983794	0.901844	0.904142	0.900769	0.901509	0.899727	0.850799	0.94733	0.900881	0.90057	0.947525	0.948342	0.904255	0.949609	0.9471	0.94792	0.901197	0.946848	0.947375	0.984561	0.901285	0.900501	0.900706	0.949552	0.94898	0.901358	0.901615	0.98405	1	0.94748	0.947399	0.900942	0.946703	0.947436	0.947825	0.982577	0.900097	0.983647	0.949577	0.928056	0.949439	0.929294	0.984276	0.90376	0.948202	0.899556
P. polymyxa TF07-21-d	0.948229	0.90165	0.902612	0.90074	0.901772	0.899851	0.821713	0.987181	0.901546	0.900483	0.987216	0.985395	0.902634	0.984494	0.987653	0.984587	0.90157	0.986519	0.988426	0.948541	0.901474	0.900457	0.900642	0.984354	0.984526	0.901482	0.901827	0.949334	0.94748	1	0.987575	0.900899	0.986681	0.988205	0.985945	0.948898	0.900782	0.94868	0.983981	0.923986	0.984431	0.924862	0.948374	0.902127	0.985397	0.899691
P. polymyxa HY96-2	0.948256	0.902199	0.903063	0.901508	0.90211	0.900447	0.825532	0.988869	0.902564	0.901056	0.996189	0.986015	0.90315	0.984817	0.988916	0.98568	0.90193	0.990786	0.988456	0.948218	0.902177	0.901345	0.901457	0.984774	0.984484	0.901692	0.902031	0.949089	0.947399	0.987575	1	0.901811	0.989295	0.988573	0.986046	0.948622	0.901843	0.948575	0.984435	0.924173	0.984848	0.925357	0.948213	0.902645	0.986047	0.900555
P. polymyxa CR1	0.902033	0.964306	0.954881	0.962652	0.975308	0.966584	0.857749	0.900425	0.989277	0.974649	0.901477	0.901547	0.953332	0.901848	0.901699	0.901121	0.990022	0.899786	0.902094	0.901204	0.989819	0.976107	0.962819	0.901782	0.900093	0.989859	0.989839	0.90275	0.900942	0.900899	0.901811	1	0.90074	0.901859	0.900276	0.901217	0.989537	0.902383	0.90041	0.891762	0.901314	0.892608	0.902121	0.95367	0.900927	0.974305
P. polymyxa TH2H2	0.947062	0.902141	0.902385	0.901174	0.901589	0.899913	0.821394	0.987599	0.901282	0.900596	0.989894	0.985163	0.902454	0.984456	0.988851	0.985439	0.901281	0.988808	0.989728	0.947871	0.901121	0.900761	0.901197	0.984553	0.984023	0.901126	0.901528	0.948289	0.946703	0.986681	0.989295	0.90074	1	0.990019	0.986061	0.948046	0.901487	0.947304	0.984131	0.92375	0.984449	0.925106	0.947355	0.90219	0.985155	0.899726
P. polymyxa SQR21	0.948156	0.901901	0.902686	0.901673	0.902236	0.900568	0.83973	0.987224	0.902457	0.901318	0.988035	0.98483	0.902908	0.984129	0.988524	0.985503	0.902056	0.988149	0.996925	0.948116	0.902533	0.901226	0.901098	0.98355	0.983793	0.902025	0.902275	0.948853	0.947436	0.988205	0.988573	0.901859	0.990019	1	0.985083	0.948443	0.901162	0.948355	0.983703	0.924062	0.984184	0.925336	0.948227	0.902328	0.984886	0.900662
P. polymyxa A18	0.949045	0.90151	0.902422	0.900385	0.901275	0.89982	0.818996	0.985555	0.900703	0.900119	0.985939	0.984596	0.902194	0.984985	0.985532	0.984056	0.900866	0.985514	0.985223	0.949336	0.900672	0.900378	0.900685	0.984955	0.985046	0.900701	0.901237	0.950046	0.947825	0.985945	0.986046	0.900276	0.986061	0.985083	1	0.94966	0.900966	0.949475	0.984604	0.92421	0.984661	0.925413	0.94934	0.901692	0.984604	0.89937
P. polymyxa ND25	0.984482	0.902911	0.904698	0.901731	0.901898	0.900629	0.811144	0.948874	0.901236	0.901637	0.948483	0.949805	0.90425	0.95083	0.948275	0.949132	0.9016	0.948314	0.948634	0.984641	0.90171	0.901254	0.902031	0.950306	0.950304	0.901756	0.902085	0.984241	0.982577	0.948898	0.948622	0.901217	0.948046	0.948443	0.94966	1	0.901661	0.984422	0.95084	0.929133	0.950677	0.930179	0.984603	0.90386	0.949804	0.900604
P. polymyxa LY214	0.901637	0.964512	0.95456	0.962357	0.975665	0.966778	0.837945	0.901064	0.997242	0.97471	0.901595	0.900571	0.953499	0.901406	0.901293	0.900828	0.989872	0.900446	0.901687	0.901686	0.989373	0.977226	0.962622	0.900877	0.900807	0.989427	0.989709	0.902091	0.900097	0.900782	0.901843	0.989537	0.901487	0.901162	0.900966	0.901661	1	0.901981	0.901059	0.891727	0.901361	0.893086	0.901873	0.953125	0.900646	0.974234
P. polymyxa KF-1	0.985051	0.903332	0.905328	0.902315	0.903004	0.900923	0.805426	0.948269	0.902508	0.901568	0.948376	0.949577	0.905266	0.950416	0.948107	0.948873	0.902697	0.947871	0.948385	0.985118	0.902733	0.901783	0.902286	0.950759	0.949877	0.902745	0.903129	0.985503	0.983647	0.94868	0.948575	0.902383	0.947304	0.948355	0.949475	0.984422	0.901981	1	0.950011	0.929312	0.950374	0.930155	0.985521	0.905194	0.949481	0.900766
P. polymyxa NRRL B-30509	0.949984	0.901736	0.902211	0.900686	0.901381	0.900217	0.824112	0.98405	0.900729	0.901236	0.984669	0.982977	0.90235	0.98422	0.98378	0.983108	0.901022	0.984308	0.983775	0.95033	0.900919	0.900584	0.900967	0.987493	0.983503	0.901003	0.901266	0.950947	0.949577	0.983981	0.984435	0.90041	0.984131	0.983703	0.984604	0.95084	0.901059	0.950011	1	0.924631	0.984071	0.925627	0.950118	0.9019	0.982923	0.899731
P. polymyxa ND24	0.92928	0.892944	0.89276	0.892256	0.892252	0.892039	0.825405	0.924203	0.891582	0.891827	0.924216	0.92438	0.893066	0.924701	0.924159	0.924071	0.891715	0.923758	0.924027	0.929682	0.89172	0.891729	0.892539	0.924716	0.924802	0.891835	0.891831	0.929814	0.928056	0.923986	0.924173	0.891762	0.92375	0.924062	0.92421	0.929133	0.891727	0.929312	0.924631	1	0.92458	0.971198	0.929344	0.892926	0.924199	0.891383
P. polymyxa DCB2-2	0.949975	0.902068	0.90335	0.90065	0.902109	0.899855	0.837999	0.984745	0.901592	0.900388	0.985037	0.983362	0.902994	0.999831	0.984325	0.984074	0.901884	0.984722	0.984141	0.950399	0.901688	0.900371	0.900734	0.984782	0.983472	0.901737	0.902259	0.951215	0.949439	0.984431	0.984848	0.901314	0.984449	0.984184	0.984661	0.950677	0.901361	0.950374	0.984071	0.92458	1	0.92556	0.950228	0.903172	0.983339	0.899572
P. polymyxa ZF197	0.930682	0.893481	0.89446	0.893993	0.893175	0.893624	0.841434	0.925194	0.893283	0.893568	0.925235	0.925626	0.894269	0.926051	0.925351	0.925101	0.892661	0.924514	0.925553	0.930671	0.893374	0.893543	0.893832	0.925899	0.925437	0.892865	0.892907	0.930914	0.929294	0.924862	0.925357	0.892608	0.925106	0.925336	0.925413	0.930179	0.893086	0.930155	0.925627	0.971198	0.92556	1	0.930712	0.894326	0.92506	0.892684
P. polymyxa SC2	0.998881	0.903006	0.904787	0.902915	0.902189	0.901438	0.811094	0.948468	0.902362	0.902342	0.947986	0.94941	0.904857	0.950504	0.948013	0.948263	0.901983	0.947625	0.948545	0.987325	0.902565	0.902448	0.902268	0.95084	0.949669	0.902004	0.902205	0.986997	0.984276	0.948374	0.948213	0.902121	0.947355	0.948227	0.94934	0.984603	0.901873	0.985521	0.950118	0.929344	0.950228	0.930712	1	0.904615	0.949162	0.90151
P. polymyxa CFSAN034341	0.904603	0.953252	0.979686	0.95234	0.954399	0.952497	0.835775	0.902233	0.953394	0.952753	0.902692	0.902251	0.9882	0.903241	0.902528	0.902428	0.953775	0.900878	0.90241	0.904711	0.953516	0.953412	0.952533	0.902577	0.901546	0.953577	0.954133	0.905289	0.90376	0.902127	0.902645	0.95367	0.90219	0.902328	0.901692	0.90386	0.953125	0.905194	0.9019	0.892926	0.903172	0.894326	0.904615	1	0.90228	0.95227
P. polymyxa ATCC 842	0.949108	0.90171	0.90256	0.900717	0.901877	0.899799	0.830891	0.984485	0.901213	0.90042	0.985987	0.999872	0.902544	0.983574	0.985412	0.983923	0.901195	0.985388	0.985178	0.949285	0.901345	0.900061	0.90045	0.982714	0.984282	0.901414	0.901687	0.950137	0.948202	0.985397	0.986047	0.900927	0.985155	0.984886	0.984604	0.949804	0.900646	0.949481	0.982923	0.924199	0.983339	0.92506	0.949162	0.90228	1	0.899417
Paenibacillus sp. S25	0.901314	0.961766	0.953252	0.959218	0.977033	0.966235	0.840238	0.899621	0.974444	0.992851	0.899835	0.900153	0.952177	0.90038	0.900148	0.899643	0.973644	0.89896	0.900205	0.900556	0.973756	0.977781	0.959786	0.900475	0.899583	0.973779	0.974571	0.901567	0.899556	0.899691	0.900555	0.974305	0.899726	0.900662	0.89937	0.900604	0.974234	0.900766	0.899731	0.891383	0.899572	0.892684	0.90151	0.95227	0.899417	1

## Sheet: origin
Supplementary Table S3b. The origin of the two isolated strains (S02 and S25) and 44 know P. polymyxa strains
Acc.	ID	Origin
Paenibacillus sp. S02	Paenibacillus sp. S02	Australia - perennial ryegrass
GCF_000520775.1_std94_genomic	P. polymyxa TD94	China - Scutellaria
GCF_001874405.2_ASM187440v3_genomic	P. polymyxa YC0136	China - rhizosphere of tobacco
Paenibacillus sp. S25	Paenibacillus sp. S25	Australia - perennial ryegrass
GCF_002916985.1_ASM291698v1_genomic	P. polymyxa LY214	China - Camptotheca acuminata
GCF_001709135.1_ASM170913v1_genomic	P. polymyxa CFSAN034342	Canada - soil
GCF_001874425.3_ASM187442v3_genomic	P. polymyxa YC0573	China - rhizosphere of tobacco
GCF_001922145.1_ASM192214v1_genomic	P. polymyxa ATCC 15970	Belgium - soil
GCF_001707685.1_ASM170768v1_genomic	P. polymyxa CFSAN034343	Canada - soil
GCF_900406265.2_PPOLYM89_genomic	P. polymyxa DSM292	Country unknown - soil
GCF_000507205.3_ASM50720v2_genomic	P. polymyxa CR1	Canada - rhizosphere of corn
GCF_000146875.3_ASM14687v2_genomic	P. polymyxa E681	South korea - rhizosphere of winter barley
GCF_001277855.1_ASM127785v1_genomic	P. polymyxa YUPP-8	China - cotton
GCF_001719045.1_ASM171904v1_genomic	P. polymyxa J	China - chili
GCF_001593085.1_ASM159308v1_genomic	P. polymyxa CCI-25	Austria - worm compost
GCF_000714835.1_DSM365V1_genomic	P. polymyxa DSM 365	Germany - garden soil
GCF_000463565.1_S6_genomic	P. polymyxa WLY78	China - soil
GCF_001709075.1_ASM170907v1_genomic	P. polymyxa CFSAN034341	Canada - soil
GCF_000819665.1_ASM81966v1_genomic	P. polymyxa Sb3-1	Egypt - desert soil
GCF_000164985.3_ASM16498v2_genomic	P. polymyxa SC2	China - rhizosphere of pepper
GCF_000237325.1_ASM23732v1_genomic	P. polymyxa M1	China - wheat root tissues
GCF_001481575.1_ASM148157v1_genomic	P. polymyxa KF-1	China
GCF_000520795.1_s143_genomic	P. polymyxa 1-43	China - rhizosphere of corn
GCF_002893885.1_ASM289388v1_genomic	P. polymyxa HY96-2	China - tomato root
GCF_000785455.1_ASM78545v1_genomic	P. polymyxa CF05	China - Cryptomeria fortunei
GCF_001662815.1_ASM166281v1_genomic	P. polymyxa ND25	India - cow rumen
GCF_000597985.1_ASM59798v1_genomic	P. polymyxa SQR21	China - rhizosphere of watermelon
GCF_900454545.1_57458_H01_genomic	P. polymyxa NCTC7575	UK
GCF_006274405.1_ASM627440v1_genomic	P. polymyxa ZF129	China - rhizosphere of potato
GCF_000735775.1_ASM73577v1_genomic	P. polymyxa CICC 10580	China - Morinda citrifolia L.
GCF_003813765.1_ASM381376v1_genomic	P. polymyxa TH2H2	South korea - tomato flower
GCF_900454525.1_49508_G02_genomic	P. polymyxa NCTC10343	UK
GCF_000955925.1_ASM95592v1_genomic	P. polymyxa EBL06	China - wheat leaf
GCF_000943535.1_ASM94353v1_genomic	P. polymyxa NRRL B-30509	Russia - poultry production environment
GCF_005217485.1_ASM521748v1_genomic	P. polymyxa PIC73	Spain - rhizosphere of olive
GCF_000265445.1_PaePol1.0_genomic	P. polymyxa OSY-DF	US - kimchee
GCA_003437195.1_ASM343719v1_genomic	P. polymyxa TF07-21-d	China - human gut
GCF_003052505.1_ASM305250v1_genomic	P. polymyxa KP10	Malaysia - milk curd
GCF_000809185.2_ASM80918v2_genomic	P. polymyxa A18	India - termite gut
GCF_003971075.1_ASM397107v1_genomic	P. polymyxa DCB2-2	Russia - groundwater
GCF_002894925.1_KCCM_40454_genomic	P. polymyxa KCCM 40454	Country unknown - soil
GCF_000217775.1_PPt02_genomic	P. polymyxa ATCC 842	Country unknown - culture collection
GCA_002376225.1_ASM237622v1_genomic	P. polymyxa UBA3557	US - metal
GCA_007858415.1_ASM785841v1_genomic	P. polymyxa ZF197	China - soil
GCF_001663585.1_ASM166358v1_genomic	P. polymyxa ND24	India - cow rumen
GCA_900454375.1_59024_G01_genomic	P. polymyxa NCTC4744	UK - carrots
