# Supplementary material for: Transcriptomics differentiate two novel bioactive strains of Paenibacillus sp. isolated from the perennial ryegrass seed microbiome
Source: Sci Rep. 2021 Jul 30;11:15545. doi: 10.1038/s41598-021-94820-2 (PMC8324883; doi:10.1038/s41598-021-94820-2)
Supplement: Supplementary file 3 — Supplementary Information 3. [file 41598_2021_94820_MOESM3_ESM.xlsx]

## Sheet: S02
Supplementary Table S10a. Transcript quantification (raw reads count) results for samples used in the N-fixation activity assay (strain S02)
gene_ID	S02_ctrl_1	S02_ctrl_2	S02_ctrl_3	S02_treated_1	S02_treated_2	S02_treated_3
KAI36_00001	1241	1345	1331	1232.6	2225	1357
KAI36_00002	593.144	652.476	643.883	640.485	1081.6	525.13
KAI36_00003	82.712	88.524	86.117	68.884	140.46	72.87
KAI36_00004	953.389	988.212	1044.05	772.922	1111.42	586.851
KAI36_00005	239.731	242.753	221.167	228.096	382.37	158.342
KAI36_00006	3252.03	3590.03	4182.8	6348.01	10214.9	6213.8
KAI36_00007	15	15	13	25	33	25
KAI36_00008	4364	4980	5243.38	8045.84	11874.4	6260
KAI36_00009	868	1110	1124	1097	1612.17	885.021
KAI36_00010	0	0	0	0	0	0
KAI36_00011	87.192	85.818	24.02	47.284	0	33.76
KAI36_00012	0	0	0	0	0	0
KAI36_00013	1210	1512	1570	1557	1626	1330
KAI36_00014	68	94	97	299	530	357
KAI36_00015	13	21	15	21	21	12
KAI36_00016	844	995	1009	703	933	412
KAI36_00017	268.099	270.413	273.112	256.119	288.04	134
KAI36_00018	636.288	746.761	797.375	702.892	855.065	581.582
KAI36_00019	668.613	822.826	810.513	587.99	697.895	420.418
KAI36_00020	2001.71	2283.37	2396.99	1822	2327.53	1165.01
KAI36_00021	1906.82	2045.13	1973.26	1438.74	2033.81	945.993
KAI36_00022	616.46	728.511	715.051	551.259	918.356	496
KAI36_00023	101.783	120.201	136.554	163.07	315.733	136.457
KAI36_00024	224.388	254.799	278.446	477.944	729.267	448.543
KAI36_00025	1170.83	1551.93	1676	5944	4703.98	2487.46
KAI36_00026	103.703	134.024	149.802	331.241	528.799	276.078
KAI36_00027	207.297	231.976	199.198	442.759	672.201	443.922
KAI36_00028	1558	1265	1531	662	1625	842
KAI36_00029	270.388	277.804	301.184	94.649	223.675	150
KAI36_00030	270.221	243.71	335.8	140.869	362.558	166.506
KAI36_00031	253.391	308.486	390.017	189.483	454.766	229.494
KAI36_00032	10062	15776	17822.4	13117	15504.7	14423
KAI36_00033	29.008	31	20	1	4	8
KAI36_00034	272.992	308	436	586.009	895.444	448
KAI36_00035	503	508	535	1060.99	1149.56	614
KAI36_00036	6615	9271	7492.71	19443.1	23769.2	18253.2
KAI36_00037	5423.99	5830.27	6814.72	10156.7	15454.7	8390.63
KAI36_00038	2805.01	3291.63	3668.37	7523.4	11855.6	7137.5
KAI36_00039	13	27	25	79	74	87
KAI36_00040	173.248	218.103	229.251	825.481	858.619	607.04
KAI36_00041	38.752	51.897	58.749	165.519	205.337	111.96
KAI36_00042	1401.87	1633.29	1571.4	1203.27	2334.36	1347.55
KAI36_00043	3819.99	4827.7	4201.89	1753.73	2341.66	1640.27
KAI36_00044	1042.09	1307	1458	719	954.106	578
KAI36_00045	566	774	1101	258	415	265
KAI36_00046	1287	1647	1627.06	1011	1433	888
KAI36_00047	4925.38	6240.15	7095.4	13943.8	22764.3	15103.6
KAI36_00048	3117.62	4163.85	4893.02	8287.26	14646	10459.6
KAI36_00049	25.211	16.145	38.272	38	37.956	23
KAI36_00050	469.838	567.17	471.802	448.964	450.958	276.011
KAI36_00051	1301.57	1507.51	1559.77	1081.43	1842.45	810.992
KAI36_00052	4925.42	5916.35	6246.25	7786.6	11682.4	7694.3
KAI36_00053	27	28	24	40	61	43
KAI36_00054	785.049	806.311	851.558	87.102	84.168	50
KAI36_00055	1541.68	1751.18	1957.61	743.898	1040.48	532
KAI36_00056	995.723	1121.47	1281.77	1005.53	1585.5	829.349
KAI36_00057	885.492	972.744	1219.77	1110.22	1722.02	915.367
KAI36_00058	11867.7	14277.8	15968	19401.2	32007.7	19710.8
KAI36_00059	1804.62	2067.83	2324.73	1474.44	1902.35	937.266
KAI36_00060	1306.62	1362.02	1473.03	1174.5	1800.93	886.868
KAI36_00061	1225.02	1587.28	1703.28	1496.07	2331.14	1108.87
KAI36_00062	521.603	674.805	757.001	285.238	469.805	189.076
KAI36_00063	1018.4	1191.17	1299.14	593.762	1001.2	465.924
KAI36_00064	3869	5202	5702.01	2574.01	20241	1772
KAI36_00065	981.913	1180.8	1139.95	506.783	1472.43	365.801
KAI36_00066	896.776	1162.65	1455.08	1050.44	1609.96	760.202
KAI36_00067	467.867	567.895	584.121	410.852	690.986	230.052
KAI36_00068	325.499	371.654	427.857	394.922	581.628	261
KAI36_00069	66.298	83.529	74.757	58.954	94.657	31
KAI36_00070	457.681	506.705	596.48	201.357	412.07	223.573
KAI36_00071	183.662	179.381	207.037	58.688	132.066	70.429
KAI36_00072	1414.36	1640.49	1765.11	1067.05	2017.23	1149
KAI36_00073	2800.46	3527.26	3824.75	4323.67	7433.66	5463
KAI36_00074	3639.45	4389.5	5342.41	5152.8	9910.94	5358.7
KAI36_00075	777.355	940.509	1031.83	941.688	1277.16	636.302
KAI36_00076	1905.01	2377.72	2459	9967	12341	6779.9
KAI36_00077	2276.43	2750.89	2866.29	5338.6	6102.22	1903.45
KAI36_00078	4339.47	4766.33	5256.69	11771.7	12910.5	3713.68
KAI36_00079	1924.56	2127.98	2369.03	7100.5	7377.87	2489.37
KAI36_00080	2191.32	2376.39	2711.35	6959.41	7130.55	1883.13
KAI36_00081	1291.25	1473.75	1709.27	3635.51	4098.93	1124.31
KAI36_00082	476.709	528.906	628.341	1333.35	1479.05	455.112
KAI36_00083	21739.2	23436.2	28247.2	49988	54799.3	18186.8
KAI36_00084	1220.07	1495	1556.99	37	60	43
KAI36_00085	0	0	0	0	0	0
KAI36_00086	0	0	0	0	0	0
KAI36_00087	#N/A	#N/A	#N/A	#N/A	#N/A	#N/A
KAI36_00088	2932	3538	4044	10081.5	18351.2	8334.3
KAI36_00089	1424	1673.38	1773	2157.26	2986.63	1286.35
KAI36_00090	1600.36	1872.01	2003.45	5417.36	7857.84	3160.4
KAI36_00091	956.326	997.82	1009.05	2729.92	3482.31	1596.79
KAI36_00092	2012.31	2242.5	2599.31	8208.79	12159.6	5932.91
KAI36_00093	6	3	2	4	2	4
KAI36_00094	6	6	5	12	17	48
KAI36_00095	1	0	3	4	6	13
KAI36_00096	1	2	1	5	7	8
KAI36_00097	3274.78	3662	4175.88	21295.5	54056.2	64171
KAI36_00098	420.208	459.205	536.428	389.308	581.017	340.998
KAI36_00099	430.792	601.788	585.572	262.692	400.983	216.002
KAI36_00100	1572.09	1741.65	1770.77	1156	1439.26	760
KAI36_00101	720.914	897.347	936.774	542	926.74	504
KAI36_00102	48.003	31	34.386	1072.46	1801.26	1439.79
KAI36_00103	43.997	36	46.614	1333.54	1803.79	1530.21
KAI36_00104	60	66	56	89	73	58
KAI36_00105	80	67	51	122	104	110
KAI36_00106	121	117	116	144.011	244	128
KAI36_00107	455	601	692	688	1685	1060
KAI36_00108	5	7	6	6	13	7
KAI36_00109	2	2	3	3	4	4
KAI36_00110	981	1323	1585	1341	1943.63	1217
KAI36_00111	54	55	71	127	181	124
KAI36_00112	66	87	87	55	62	54
KAI36_00113	932	1370	1342	2552	4365.1	3486
KAI36_00114	40	52	62	52	64	51
KAI36_00115	133.236	189.864	175.591	198.966	260.111	155.134
KAI36_00116	90.764	150.136	165.409	242.034	295.889	157.866
KAI36_00117	53	62	78	149	205	118
KAI36_00118	1	1	0	2	0	1
KAI36_00119	43	46	36	54	104.131	34
KAI36_00120	36	46	64	57	104.869	53
KAI36_00121	189	251	301	131	288	198
KAI36_00122	2845.16	4206	3909	1603	1946.02	1231.18
KAI36_00123	1477	1594.63	1844.61	13129.6	15426.9	5456
KAI36_00124	159.343	194.349	211.217	233.32	476.421	540.496
KAI36_00125	75.657	102.651	102.785	89.68	149.579	167.504
KAI36_00126	98.435	100	160.542	139	210.523	145
KAI36_00127	88.565	74	87.458	107	126.477	85
KAI36_00128	31	44	41	46	72	48
KAI36_00129	344.374	391.203	394.095	261.052	382.269	208.457
KAI36_00130	1449.63	1695.8	1896.91	2862.95	4539.8	2864.54
KAI36_00131	11	5	12	18	14	6
KAI36_00132	4	8	8	4	2	7
KAI36_00133	11	13	10	7	5	2
KAI36_00134	74	76.643	73.26	21.997	40.715	24
KAI36_00135	42	50.354	67.74	28.003	24.285	21
KAI36_00136	35	28.003	37	18	30	26
KAI36_00137	15	35	20	22	20	24
KAI36_00138	3818.79	4847.89	4255	9477	13722	12797.1
KAI36_00139	1541	1366.32	1755	6411.21	8007.41	4563.28
KAI36_00140	566	804	625	1747	1612	1059
KAI36_00141	16959.3	24840.9	29346.2	58280.9	89905.6	72099
KAI36_00142	1595	1712.25	1950.12	992.719	1954.63	1020
KAI36_00143	1537.67	1537.56	1612.28	1173.88	2400.76	1157.04
KAI36_00144	1056.25	1138.44	1402.69	1455.12	2341.25	1306.98
KAI36_00145	437.089	487	608.027	2499	2544.22	2248.98
KAI36_00146	5865.48	7121.74	8341.42	4020.16	6379.32	3123.2
KAI36_00147	1289.15	1666.86	1705.13	2105.42	2848.87	1727.85
KAI36_00148	2575.28	3182.51	3963.43	4122.22	5891.76	3349.05
KAI36_00149	0	0	0	0	0	0
KAI36_00150	3.999	4	1	2.769	3	1
KAI36_00151	1.001	3	4	1.231	1	2
KAI36_00152	#N/A	#N/A	#N/A	#N/A	#N/A	#N/A
KAI36_00153	#N/A	#N/A	#N/A	#N/A	#N/A	#N/A
KAI36_00154	0	0	0	0	0	0.5
KAI36_00155	3	4.862	4	8	1	2
KAI36_00156	29.788	27.398	1.326	8.872	4.119	3.314
KAI36_00157	14	11	7	19	15	16
KAI36_00158	6.292	4	6	2.733	1	3
KAI36_00159	1.5	2	1	3	0	2
KAI36_00160	3	1	1	1	1	4
KAI36_00161	6	4	2	7	3	10
KAI36_00162	1	0	1	0	0	0
KAI36_00163	20	31	13	20	13	22
KAI36_00164	0	0	0	0	0	0
KAI36_00165	291.114	447.293	411.106	210	215.034	112.011
KAI36_00166	1826.87	2323.72	2711.01	7569.93	15905.1	15897.7
KAI36_00167	1074.05	1235.7	1169.89	1216.12	1660.67	865.995
KAI36_00168	1025.15	1129.38	1151.06	1229.52	1753.27	843.412
KAI36_00169	609.918	594.923	645.751	715.584	1134.9	582.944
KAI36_00170	407.88	476	482.808	600.778	949.195	539.651
KAI36_00171	210	253	322	187	153	112
KAI36_00172	759.305	915.629	836.841	312.568	484.462	589.78
KAI36_00173	358.578	404.139	367.514	184.883	164.366	234.725
KAI36_00174	1075.88	1315.2	1288.79	590.021	739.316	732.101
KAI36_00175	496.947	557.172	589.204	301.354	364.856	351.336
KAI36_00176	398.29	461.897	470.935	202.174	242.003	244.107
KAI36_00177	784.997	908.107	991.376	422.003	561.837	514.135
KAI36_00178	602.368	662.617	875.77	314.51	458.147	426.823
KAI36_00179	456.565	595.448	724.147	317.514	474.29	389.52
KAI36_00180	640.07	727.828	901.714	383.972	517.447	535.675
KAI36_00181	3251.64	3589.07	4126.38	1284.99	2562.69	1306.62
KAI36_00182	2121.38	2535.17	2688.62	1574.01	2500.31	1608.38
KAI36_00183	805.947	876.998	933.918	1574.46	2021.29	998.689
KAI36_00184	493.623	480.258	535.172	1013.21	1177.06	625.826
KAI36_00185	711.146	697.395	786.69	1225.34	1665.9	835.078
KAI36_00186	511.541	663.348	685.221	991.99	1331.21	783.408
KAI36_00187	145	139	146	820	876.959	1060
KAI36_00188	186	285	306	1817	2757.43	2622.14
KAI36_00189	1290	1075	1369	5580.06	9612.62	11598
KAI36_00190	3729	5293	6584	6224.83	9815.89	6024
KAI36_00191	0	0	0	0	0	0
KAI36_00192	4309.1	4734.39	5223.67	15932	12278.3	9514.41
KAI36_00193	11355.4	13923	15662.9	59314	89498.3	58624.2
KAI36_00194	6443.24	7350.07	8380.19	17201.3	23983.7	10646.3
KAI36_00195	4682.15	5327.33	5392.94	9645.68	14142.4	6129.08
KAI36_00196	9904.8	10837.2	12280	22154.9	33266.7	13980.8
KAI36_00197	12998.2	16279.1	18269.2	39834.4	63231	28735.3
KAI36_00198	194	224	229	513	511	334
KAI36_00199	3690	3970	4107	2412	3300	1622
KAI36_00200	926	1130	1317	767	987	670
KAI36_00201	172641	215808	281012	182561	211622	131250
KAI36_00202	0	0	1	2	6	0
KAI36_00203	1	2	0	5	4	4
KAI36_00204	2	4	4	15	20	17
KAI36_00205	66	80	72	22.995	43	25
KAI36_00206	110	134	123	85	81	48
KAI36_00207	4	5	5.809	16.778	14.313	13.438
KAI36_00208	37	35	47.191	73.222	133.687	103.562
KAI36_00209	156	207	228	92	87	66
KAI36_00210	16	17	25	8	13	12
KAI36_00211	169	177	195.462	817	763.015	379
KAI36_00212	113	122	119	250	276	227
KAI36_00213	2388	3176.68	3412.19	1029	1535.9	955.161
KAI36_00214	139	120	105.72	146	193.717	126.519
KAI36_00215	96.362	111.44	126.863	205.905	245.602	119.703
KAI36_00216	133.636	137.56	122.421	229.558	301.854	167.701
KAI36_00217	155.002	220	186.996	359.537	447.036	253.076
KAI36_00218	155	189	162	97	145	85
KAI36_00219	20	26	42	42	47	43
KAI36_00220	15	12	7	13	7	22
KAI36_00221	10	7	9	14	14	12
KAI36_00222	12	9	11	27	25	12
KAI36_00223	559	624	714	388	491	302
KAI36_00224	19	23	19	24	49	23
KAI36_00225	117.716	149	162.751	81	137	75
KAI36_00226	87.284	101	112.044	113	180	99
KAI36_00227	29	47	44	89	112	55
KAI36_00228	46	48	74	62	109.035	71
KAI36_00229	7	12	5	16	19	11.697
KAI36_00230	3	4	3	5	3	2.303
KAI36_00231	19	27	24	6	21	18
KAI36_00232	79.413	100	111	51	86	44
KAI36_00233	105.587	105	142	104	144	73
KAI36_00234	84.353	127.3	103.516	171.989	211.829	158.725
KAI36_00235	41.647	47.7	44.484	59.011	95.171	58.275
KAI36_00236	164	239	257	182	211	128
KAI36_00237	25.569	40.858	40.561	14	33.335	25.479
KAI36_00238	192.431	287.142	265.439	120	152.665	136.521
KAI36_00239	43	54	68	72	104.002	68
KAI36_00240	2	2	10	15	18.998	7
KAI36_00241	5	3	3	18	30	11
KAI36_00242	2	3	10	260	485	335
KAI36_00243	72.319	78	73.048	63	114.593	72
KAI36_00244	129.681	106	171	86	143.407	114
KAI36_00245	564	616.838	711.868	1379	1738.75	1221
KAI36_00246	54	62.442	78.132	49	80.251	36
KAI36_00247	728	820	852	7804	11319.7	4993
KAI36_00248	54	48	70.826	174	214	285
KAI36_00249	781.587	900.415	1118.34	642.36	1140.38	572.577
KAI36_00250	362.413	351.585	400.835	286.64	408.615	166.423
KAI36_00251	66	92	91	76	96	75
KAI36_00252	186.933	271.233	240.378	195.413	182.584	160.187
KAI36_00253	221.067	330.767	312.67	215.039	216.416	180.813
KAI36_00254	78	50.495	71.435	8.51	18	23.612
KAI36_00255	363	319.505	317.565	66.49	122	83.388
KAI36_00256	869.609	1029	1042.95	468	643	360
KAI36_00257	527.63	601.415	589.57	184.002	304.029	141.567
KAI36_00258	674.37	755.585	951.43	680.998	1245.98	722.433
KAI36_00259	89	102	123.075	43	62	37
KAI36_00260	246	333	360.925	266	370	221
KAI36_00261	223	273	342	574	975	821
KAI36_00262	122	146	168.603	203	350.467	191.474
KAI36_00263	178	183	215.397	186	275.533	154.526
KAI36_00264	302	320	390	946	2520.05	1960
KAI36_00265	79	97	107	501	848.016	600
KAI36_00266	54	77	57	68	127	54
KAI36_00267	4369.92	6215.83	6818.11	2585	18121	876
KAI36_00268	240.87	363.302	410.79	193.874	870.849	30.391
KAI36_00269	437.212	481.719	519.528	283.64	1145.08	50.609
KAI36_00270	795.2	952.592	1140.18	656.49	2694.93	101.993
KAI36_00271	979.537	1120.6	1386.01	913.701	2890.06	135.222
KAI36_00272	353.264	404.966	462.892	479.294	1087.34	67.785
KAI36_00273	1	5	2	5	9	8
KAI36_00274	6	2	4	41	58	43
KAI36_00275	18	12	10	53	37	15
KAI36_00276	237	339	260	287	290	225
KAI36_00277	2718	3449	4087	797	1058	510
KAI36_00278	2	8	4	2	2	1
KAI36_00279	13	20	25	80	90	66
KAI36_00280	158	256	252	847	893	474
KAI36_00281	0	0	0	0	0	0
KAI36_00282	17	20	21	27	45	18
KAI36_00283	12	12	10	10	19	13
KAI36_00284	115	119	136	944	1052	727
KAI36_00285	1791	2567.3	2885	2293	3044	1686
KAI36_00286	13	9	7	13	28	25
KAI36_00287	6	4	7	26	44	34
KAI36_00288	6	14	11	23	52	64
KAI36_00289	387	528	564	362	435	256
KAI36_00290	1691.17	2166.44	2248	2874.29	3793.4	2814.42
KAI36_00291	1158.89	1617.56	1778	1650.71	2273.61	1593.89
KAI36_00292	0	0	0	4	1	0
KAI36_00293	112	111	100	364	492	410
KAI36_00294	152	202	208	143	195	134
KAI36_00295	160	122	141	1399	2057.08	1579
KAI36_00296	2391.41	3190	3295	168	121	160
KAI36_00297	9.005	6	11	4	2	2
KAI36_00298	3.995	6	8	7	5	3
KAI36_00299	0	0	0	0	1	1
KAI36_00300	6	6	5.387	8	7	4
KAI36_00301	4	7	11.613	7	15	14
KAI36_00302	468	491	634	5129	7321.89	7747.44
KAI36_00303	59	60	78	44	106	50
KAI36_00304	2685.64	2974.52	3595.53	19313.4	27531.3	35866.6
KAI36_00305	703.458	804.479	958.564	2171.59	4995.64	3096.47
KAI36_00306	28	34	37	54	69	57
KAI36_00307	58	70	73	117	109	52
KAI36_00308	14	25	20	13	25	17
KAI36_00309	44	60	79	6	8	4
KAI36_00310	46	56.542	41.005	53	42.998	23.61
KAI36_00311	63.997	77.901	92.448	112.243	130.271	64.795
KAI36_00312	69.007	76.557	84.548	150.757	180.414	86.595
KAI36_00313	35.996	45	47.999	84	86.317	40
KAI36_00314	209.016	233	278	142	193	121
KAI36_00315	228	230	268	236	416.238	218
KAI36_00316	1058	1212.1	1224.02	222	279	123
KAI36_00317	487.695	596	767	322	522	191.013
KAI36_00318	75.305	80	76	37	47	26.987
KAI36_00319	198.417	243	262	74	119.481	68
KAI36_00320	89.354	112.393	146.789	57.455	64.872	50.379
KAI36_00321	134.229	138.607	173.211	73.545	108.646	66.621
KAI36_00322	11	13	11	386	209	120
KAI36_00323	7	14	9	41	25	23
KAI36_00324	0	1	3	372	319	311
KAI36_00325	13	10	17	120.368	74.998	86
KAI36_00326	9	15	10	44.632	37.002	36.42
KAI36_00327	3	1	4	4	1	1.58
KAI36_00328	160	123	139	3380.82	4214	2554.01
KAI36_00329	12	12	14	28	31.006	29
KAI36_00330	61	67	83	150	236	192
KAI36_00331	478	588	567.483	207.002	250	165
KAI36_00332	265	304.339	335.023	149.998	197	107
KAI36_00333	196	205.661	248.494	264	271.54	181
KAI36_00334	1047.34	1518.93	1745.88	413	608.447	331
KAI36_00335	256.532	358.189	459.058	11	11.953	17
KAI36_00336	88.476	148.34	153.86	9	3	2
KAI36_00337	384.021	632.25	724.608	24	28	32
KAI36_00338	1287.43	1896.32	1938.65	68	60	62
KAI36_00339	34	38.162	45.006	31	43	22.618
KAI36_00340	108	128.838	140.994	107	144	99.382
KAI36_00341	2807	3277.99	3919.02	7619.33	21929.8	5126
KAI36_00342	3746.99	4991	6075.03	13112	24349.3	14958.6
KAI36_00343	133.496	199.278	221.639	127.601	220.326	98.513
KAI36_00344	65.527	122.722	106.313	92.399	121.674	73.487
KAI36_00345	6	4	7	14	21	22
KAI36_00346	107	136	156	8	10	6
KAI36_00347	259	325	374	596	690	678
KAI36_00348	691.653	668.438	671.282	1743	3301.48	1502
KAI36_00349	180.134	179.665	190.694	319.176	480.552	204.916
KAI36_00350	177.793	206.405	205.047	338.502	548.296	191.087
KAI36_00351	513.42	573.492	675.977	960.33	1610.67	627.521
KAI36_00352	338.302	326.367	373.664	610.262	991.071	375.283
KAI36_00353	237.68	222.229	221.811	358.437	625.616	325.48
KAI36_00354	244.018	178.409	246.525	334.285	725.313	279.187
KAI36_00355	181	191	171.015	267	365.375	170
KAI36_00356	250	284	314.985	461	748.625	373
KAI36_00357	0	0	0	0	0	0
KAI36_00358	19.132	9.096	0	0	0	14.689
KAI36_00359	#N/A	#N/A	#N/A	#N/A	#N/A	#N/A
KAI36_00360	0	1	1	0	0	0.5
KAI36_00361	1	1.138	0	2	0	0
KAI36_00362	2	3	3	2	1	1
KAI36_00363	1.708	0	0	1.267	0	0
KAI36_00364	#N/A	#N/A	#N/A	#N/A	#N/A	#N/A
KAI36_00365	0	0	0	0	0	0
KAI36_00366	#N/A	#N/A	#N/A	#N/A	#N/A	#N/A
KAI36_00367	0	0	0	0	0	0
KAI36_00368	#N/A	#N/A	#N/A	#N/A	#N/A	#N/A
KAI36_00369	#N/A	#N/A	#N/A	#N/A	#N/A	#N/A
KAI36_00370	#N/A	#N/A	#N/A	#N/A	#N/A	#N/A
KAI36_00371	#N/A	#N/A	#N/A	#N/A	#N/A	#N/A
KAI36_00372	3	3	1	3	1	5
KAI36_00373	12	13	3	4	3	1
KAI36_00374	0	2	0	0	0	0
KAI36_00375	0	0	1	5	1	3
KAI36_00376	3	0	0	3	0	2
KAI36_00377	0	0	0	0	0	1
KAI36_00378	1	0	0	0	0	0
KAI36_00379	0	1	0	0	0	1
KAI36_00380	0	0	1	0	0	0
KAI36_00381	1009.93	1390.4	1444.85	2098.87	1892.93	773.995
KAI36_00382	939.915	1143.6	1240.15	1924.15	1553.97	849.342
KAI36_00383	117	190	251	2389.98	1004.1	946.663
KAI36_00384	1238	2344	2333	14825	10762.6	12471
KAI36_00385	1	0	0	0	0	0
KAI36_00386	0	0	0	0	0	0
KAI36_00387	#N/A	#N/A	#N/A	#N/A	#N/A	#N/A
KAI36_00388	79	80	51	38	57	27
KAI36_00389	41	48	56	35	31	22
KAI36_00390	21	31	24	13	22.032	9
KAI36_00391	169	236.918	252.953	423	389.925	115
KAI36_00392	50	60.082	58.348	73.399	76.043	33
KAI36_00393	40	54	74.699	69.601	89	46
KAI36_00394	26	37	30	56	87	35
KAI36_00395	70	82.742	85	66	47.579	15
KAI36_00396	135	152.258	155.13	162	195.741	50
KAI36_00397	15	17	11.871	12.002	13.683	9.461
KAI36_00398	130	205	214.999	103.998	110.997	85.539
KAI36_00399	57	106	84	69	106	48
KAI36_00400	532	598	641	2678	4236.02	2968
KAI36_00401	304.697	367.614	474.036	376.085	866.566	355.437
KAI36_00402	246.303	281.386	357.964	214.915	430.594	180.563
KAI36_00403	1684	2274.06	2362.17	6579	8674.08	3270
KAI36_00404	1784.4	2337.78	2698.89	1801.23	4427.47	1166.27
KAI36_00405	688.755	880.637	943.159	897.941	3024.68	538.248
KAI36_00406	248.838	302.677	343.513	634.255	1695.81	240.879
KAI36_00407	248.183	316.563	406.44	871.037	2313.42	340.075
KAI36_00408	1100.82	1752.34	1694.68	4739.53	10006.4	2381.24
KAI36_00409	109	145	182	304	955.828	180
KAI36_00410	8	5.998	7	26.484	55.418	145.905
KAI36_00411	4	5.002	10	31.248	59.582	194.094
KAI36_00412	20	20	20	188.268	295.998	881.704
KAI36_00413	15	7	9	136	160.002	378.299
KAI36_00414	1404	1751.02	2311	1850	3055	2180
KAI36_00415	2	1	4	11	4	6
KAI36_00416	17	13	27	33	42	95
KAI36_00417	444	591.992	679.32	321	361	181
KAI36_00418	704.961	862.361	1012.28	305.121	396.106	276.429
KAI36_00419	182.039	187.639	232.72	72.879	119.894	61.613
KAI36_00420	190	270	232	124	159	119
KAI36_00421	73	99	107	45	59	35
KAI36_00422	1747	1934	2222	3542	5737	3027
KAI36_00423	531.424	597.844	666.877	441.999	813.999	700.586
KAI36_00424	458.576	413.156	552.123	492.001	657.001	576.414
KAI36_00425	1264	1279	1348	2474.03	2882	1404
KAI36_00426	49	46	28	105	49	42
KAI36_00427	1614	2012.52	2131.14	2492	2830.19	1460.99
KAI36_00428	303	348	373	364	535.056	360.159
KAI36_00429	920.875	1203.5	1044.22	156	234.452	196.074
KAI36_00430	453.164	606.519	447.659	148	138.83	137.767
KAI36_00431	4363.96	5554.47	5834.04	203	303	221
KAI36_00432	1702	2400	2887	1948	2297.45	1331
KAI36_00433	176.614	200.924	202.4	149.009	191.63	87
KAI36_00434	215.91	251.414	319.6	204.9	333.275	126.001
KAI36_00435	178.009	194.041	171.222	162.128	189.268	90.021
KAI36_00436	307.467	370.622	326.778	400.963	391.827	195.978
KAI36_00437	678	717	698	613	626	266
KAI36_00438	2176	2703	3072	78	98	80
KAI36_00439	4523	5943.08	5994.76	7679.89	11266.4	8171
KAI36_00440	209	228	232	1243	1805.26	782
KAI36_00441	7	8	3	26	27	19
KAI36_00442	7	3	4	24	31.99	23
KAI36_00443	8	11	22	23	32.01	22
KAI36_00444	47	59	56	131	233	331
KAI36_00445	484	497	523	48	80	44
KAI36_00446	112.227	135.593	141.177	106.79	326.573	111.777
KAI36_00447	163.773	190.407	202.823	196.21	308.423	153.223
KAI36_00448	4	4	6	4	19	23
KAI36_00449	430.188	544.096	575.505	122	3482.12	18
KAI36_00450	204.812	272.811	288.495	116	3074.9	14
KAI36_00451	10	5.093	5	5	16.015	3.081
KAI36_00452	176	250.97	249	358	488.001	433.919
KAI36_00453	576	751	805	506	900	499
KAI36_00454	111	143	122	145	168	94
KAI36_00455	100	82	131	342.464	582	393
KAI36_00456	725.97	771	832.307	35	61	37
KAI36_00457	110.485	109.697	84.615	84	105.766	79.798
KAI36_00458	137.515	198.303	151.385	118	143.234	90.562
KAI36_00459	97.821	123.003	123.151	128.434	168.058	95.241
KAI36_00460	68.578	61.673	101.282	65.446	83.942	43.395
KAI36_00461	76.6	59.324	75.567	106.12	110	81.004
KAI36_00462	262	253	323	2290	1529.02	2519.01
KAI36_00463	962.35	1274	1016	1800	1913	1185
KAI36_00464	105	85	94	69	81	46
KAI36_00465	0	0	0	1	0	0
KAI36_00466	479.175	571.963	529.951	301.976	365.535	551.978
KAI36_00467	701.55	863.035	953.048	368.024	592.295	389.656
KAI36_00468	109.275	141.002	135.999	27	49.171	30
KAI36_00469	257	339	334	150	179	132
KAI36_00470	3508	4623	4894.64	2952	4252	2581
KAI36_00471	71	79	72	71	116	82
KAI36_00472	279	371	433	467	653.003	402
KAI36_00473	113	147	172	172	316	163
KAI36_00474	4317	5944.56	6353.86	7408.99	12667.9	9479
KAI36_00475	549	625	702	339	588	421
KAI36_00476	504	640	571.47	113	448.002	94
KAI36_00477	126	134	176	568	869	537
KAI36_00478	974	1167	1331	155	235	138
KAI36_00479	375	527	570	705	932	467
KAI36_00480	800	1070	1196	1035	1408.09	762
KAI36_00481	1	3	1	2	0	0
KAI36_00482	283.069	310.544	337.766	194.509	285.26	148.283
KAI36_00483	1745.9	2367.46	3497.23	1416.49	2247.73	1291.72
KAI36_00484	3.029	2	5	5	1	1
KAI36_00485	142	192	197	74	107	99
KAI36_00486	55	38	33	102	213	115
KAI36_00487	48	64	87	52	88	72
KAI36_00488	19	14	27	24	43	30
KAI36_00489	55	34	40	266	299.006	218
KAI36_00490	679.041	600.788	749.037	1403.86	2575.86	2884.69
KAI36_00491	1737.96	1592.29	1785.86	1557.14	3453.14	2584.31
KAI36_00492	859.861	1286	1209	542	452	327
KAI36_00493	0	0	0	0	0	0
KAI36_00494	808.541	1038.73	1072.22	3927.66	4899.53	2157.55
KAI36_00495	3	7	4	16	7	11
KAI36_00496	14	7	14	5	3	7
KAI36_00497	14	12	19	12	17.002	10
KAI36_00498	3	0	2	1	4.998	2
KAI36_00499	1	0	0	11	24	83
KAI36_00500	0	2	5	5	6	4
KAI36_00501	880.466	1235.33	1199.78	3245.14	3955.52	1828.31
KAI36_00502	39	35	24	139	61	55
KAI36_00503	4	5	8	8	5	1
KAI36_00504	2	5	2	7	7	3
KAI36_00505	12	9	4	9	29	61
KAI36_00506	5	1	4	8	5	24
KAI36_00507	7	21	11	22	31	29
KAI36_00508	0	0	0	0	0	2
KAI36_00509	16	14	21	164	284	269
KAI36_00510	34	51	39	57	61	31
KAI36_00511	293.081	382.19	410	937.091	2601.78	3386.22
KAI36_00512	4	13	7	29	18	13
KAI36_00513	9	14	16	21	50	73
KAI36_00514	134	146	117.771	158	196.778	103.117
KAI36_00515	94	144	139.229	157	194.222	109
KAI36_00516	10.345	20	23.802	35.751	58.104	34.419
KAI36_00517	7.652	9	9.198	22.249	46.895	14.277
KAI36_00518	40.003	41	44	45	116.007	37.304
KAI36_00519	49	58	67	74	111	56
KAI36_00520	19	39	40	33	30	25
KAI36_00521	1345.53	1844	1989	2474	9459.45	571
KAI36_00522	113	151	118	172	305.127	99
KAI36_00523	454	566.578	557	1294	1331.87	857
KAI36_00524	29	26	19	77	39	43
KAI36_00525	31	39	34	59	76	80
KAI36_00526	25	26	32	139	197	146
KAI36_00527	274.802	348.013	310.67	289.399	391.357	228.846
KAI36_00528	195.198	308.987	331.33	216.601	351.643	228.156
KAI36_00529	34	41.558	57	74.512	126.809	77.569
KAI36_00530	7	6.442	9	13.488	21.191	11.431
KAI36_00531	932.424	1203	1462.99	2683	4305.11	3186
KAI36_00532	36	47	48	69	90	79
KAI36_00533	98	123	180	10	17	15
KAI36_00534	62	81	79	127	252	93
KAI36_00535	2988.3	3716	4474.06	2609.97	4111.02	2382
KAI36_00536	113	145	177	90.029	121	67
KAI36_00537	70.563	74.338	95.993	67.245	140.019	76.4
KAI36_00538	88.437	98.662	122.007	216.755	384.981	139.6
KAI36_00539	7	6.284	5	2	7	6
KAI36_00540	15	12.716	11	16	19	19
KAI36_00541	9	6	9	9	14	12
KAI36_00542	165	228	194	97	122	94
KAI36_00543	49	46	57.164	48	81	35
KAI36_00544	1028.03	1178.35	1501.18	1013	1787.96	823.774
KAI36_00545	306.975	293.646	357.922	319	557.039	237.234
KAI36_00546	1157.88	1360	1485.74	1213	2083	1089.77
KAI36_00547	69.658	80.418	105.561	169.212	217.494	149.216
KAI36_00548	72.469	54.466	79.171	122.236	225.706	145.396
KAI36_00549	307.991	352.116	373.403	630.553	1031.8	636.389
KAI36_00550	84	98	113.865	283	430	326
KAI36_00551	3	3	3	5	7	3
KAI36_00552	48	71	83	105	176	126
KAI36_00553	82	125	126	44	86	41
KAI36_00554	63	88	81	206	298	268
KAI36_00555	233	286	316	422	631	488
KAI36_00556	3	3	6	43	56	34
KAI36_00557	16	19	23	13.262	14	13
KAI36_00558	57	58	59	60.738	87	58
KAI36_00559	3145	3891.1	4477.27	7804	13067.4	8476
KAI36_00560	1395.01	2068	2128.77	762	1638	587
KAI36_00561	2073.55	2855.68	2782.79	589.412	6075.68	94.739
KAI36_00562	4586.46	5219.83	5525.19	1468.12	15385.7	136.261
KAI36_00563	7267.06	9184.43	8897.81	3575.47	30398	347
KAI36_00564	56	90	73	45	65	36
KAI36_00565	792	936	986	469	801	484
KAI36_00566	79	89	115	114	125	107
KAI36_00567	14	15.189	15	30	28	30.307
KAI36_00568	3	12.811	11	13	10	6.693
KAI36_00569	372	424	518	769	1252	747
KAI36_00570	1281.82	1516.91	1465.36	614.557	959.579	628.629
KAI36_00571	992.334	1137.09	1247.62	455.443	803.421	476.371
KAI36_00572	221	281	303.979	279	372	241
KAI36_00573	198.385	252.534	225.994	199.784	202.248	113.665
KAI36_00574	953.615	1247.47	1489.01	967.216	1367.75	712.335
KAI36_00575	549	602	640	745	1419	1159
KAI36_00576	124.049	191.227	155.993	113.34	121.053	71.001
KAI36_00577	552.482	690.773	735.007	293.66	352.947	223.999
KAI36_00578	0	1	2	0	0	6
KAI36_00579	14	18.727	19.518	16.875	27.778	28
KAI36_00580	124.995	127.273	154.482	69.125	140.581	72
KAI36_00581	202	256	268	95	176.64	97
KAI36_00582	505.003	778	793	372	729	608.818
KAI36_00583	17	12	10	11	13	14
KAI36_00584	78	104	118	177	214	89
KAI36_00585	17	17	21	33	23	14
KAI36_00586	26	30	45	95	118	26
KAI36_00587	2	6	3	11	14	4
KAI36_00588	20	28	29	13	27	17
KAI36_00589	35.776	22	26	23.754	35.998	20.484
KAI36_00590	103.154	105.427	104.997	99.125	169.832	75.516
KAI36_00591	96.416	104.425	107.003	120.12	158.018	93.25
KAI36_00592	221.653	261.188	286	314	508.153	308.75
KAI36_00593	0	0	1	0	0	2
KAI36_00594	823	1077	1002	568	549	378.004
KAI36_00595	0	0	0	0	0	2
KAI36_00596	5	1	4	4	3	3
KAI36_00597	8	18	10.001	13	19	7
KAI36_00598	18	28	32.999	66	70.006	47
KAI36_00599	20.233	21.189	24.191	42	56.002	36.001
KAI36_00600	63.767	99.811	114.809	114	128.998	93.999
KAI36_00601	36.565	43.622	55.539	36	65.823	31
KAI36_00602	26.435	51.378	22.3	37	30.667	26
KAI36_00603	14	34	41.16	38	27.51	23
KAI36_00604	19	20	24	30	31	20
KAI36_00605	59	92	76	89	125	70
KAI36_00606	4	1	1	2	6	4
KAI36_00607	60	94	68	164	176	159
KAI36_00608	23	22	33	25	19	19
KAI36_00609	3	0	0	1	0	0
KAI36_00610	218	271	299	149	163	131
KAI36_00611	269	392	414.546	266	374	166
KAI36_00612	34	40	46.454	43	44	24
KAI36_00613	79	92	105	56	73	41
KAI36_00614	19	18	23	16	20	4
KAI36_00615	66	61	68	51	60	28
KAI36_00616	1	3	1	4	6	4
KAI36_00617	155	176	193	279	376	269
KAI36_00618	14	8	6.28	32	33	29
KAI36_00619	51	64	74.72	83	100	77
KAI36_00620	19	17	34	15	15	10
KAI36_00621	25	45	38	22	45	25
KAI36_00622	38	48	53	36	54	47
KAI36_00623	81	74	96	74	101	73
KAI36_00624	67	80.62	99	92	116	67
KAI36_00625	1	1	0	7	7	7
KAI36_00626	2905.4	2946.96	3040.84	2361.87	4991.44	4280.73
KAI36_00627	1469.83	1536.64	1619.35	711.131	1514.18	1364.22
KAI36_00628	524.757	563.751	653.816	412	725.382	582.781
KAI36_00629	37	51.022	50.127	11	30	10.606
KAI36_00630	16	32.978	39.873	13	15	6.394
KAI36_00631	13	14	19	9	8	7
KAI36_00632	274	340	382	378	462	345
KAI36_00633	4	3	5	4.998	9	3
KAI36_00634	4	8	4.492	3.002	7	7
KAI36_00635	18	22	33.508	24	36	19
KAI36_00636	29.074	38	54	9	20	13
KAI36_00637	11.926	15	20	6	9	4
KAI36_00638	91	116.336	134	1225.25	1165	697.998
KAI36_00639	5	8.664	2	79.751	55.001	28.002
KAI36_00640	17	30	34	25	41	23
KAI36_00641	890.997	840	967.684	1503.82	2320.38	2461.28
KAI36_00642	28.002	33	38.316	49.177	67.634	80.723
KAI36_00643	10	6	17	10	13	17
KAI36_00644	21	24	28	15	19.382	8
KAI36_00645	28	28	53	19	40.618	22
KAI36_00646	59	81	80	46	62	61
KAI36_00647	125	151	163.001	414	572	535.005
KAI36_00648	478	587	578	449	417	402
KAI36_00649	1883.07	2627	2433	398	392	262
KAI36_00650	10	27	24	17	32	16
KAI36_00651	103	90.687	102	47	52.588	40
KAI36_00652	237	260.313	317	121	179.402	109
KAI36_00653	26.666	21	33	26	29.451	12.567
KAI36_00654	44.334	43.766	58.163	30	32.559	22.582
KAI36_00655	63.736	65.793	72.266	127.651	107.365	73.542
KAI36_00656	594.643	822.441	905.571	1061.35	1128.63	875.307
KAI36_00657	154.662	147	143	24	32	16
KAI36_00658	127	170	165	129	157	108
KAI36_00659	248.884	252.102	271.492	170	265.598	143.003
KAI36_00660	351.116	390.898	376.508	163	300.402	166.997
KAI36_00661	71	97	67.009	69	95	42.998
KAI36_00662	106.499	156	180.477	296.184	332.086	199.384
KAI36_00663	462.501	488	605.514	746.816	1010.91	595.14
KAI36_00664	1970	2320	2400	967	1369	674
KAI36_00665	430	413	425	424	727	674
KAI36_00666	272	407	433	251	411	259
KAI36_00667	40	48	56	67	118	74
KAI36_00668	1	3	0	7	3.589	2.474
KAI36_00669	96	116	109.037	154	164.411	120.526
KAI36_00670	62	72	81.593	29	51	36
KAI36_00671	27	23	22.407	8	12	7
KAI36_00672	5	10	16	13	21	14
KAI36_00673	11	10	9	10	9	9.911
KAI36_00674	6	5	4	8	16	1.089
KAI36_00675	10	6	8	59	26	6
KAI36_00676	16	26	31	22	27	13
KAI36_00677	51	38	56	179	373	492
KAI36_00678	59	73	79	86	131	52
KAI36_00679	151	168	182	146	229	147
KAI36_00680	34	40	27	7	17	10
KAI36_00681	303	389	375	38	61	43
KAI36_00682	1	0	0	0	2	1
KAI36_00683	5	1	0	2	0	2
KAI36_00684	44	41	28.274	11	21.291	11.2
KAI36_00685	121.263	158.145	160.726	69	87.719	39.8
KAI36_00686	73.899	89.553	58.601	35	39.559	39
KAI36_00687	533.839	606.301	677.399	231	334.44	207
KAI36_00688	27.008	38	40	47	56.004	49
KAI36_00689	4.992	10	10	13	20.337	8
KAI36_00690	23	36	26.367	49	52.659	50
KAI36_00691	70	82	92.633	87	77	63
KAI36_00692	2	8	11	7	19	22
KAI36_00693	69	121	99	58	73	42
KAI36_00694	43	47	48	45	46	42
KAI36_00695	483	649	598	905	953	699
KAI36_00696	23.013	19	38	82	78	62
KAI36_00697	143.987	231.029	218	93	113	86
KAI36_00698	815.001	888	934	49	48	25
KAI36_00699	483.775	550.521	653.436	1085.88	2438.04	1553.84
KAI36_00700	158.225	212.479	298.564	425.125	884.968	442.165
KAI36_00701	663	902	925	36	42	32
KAI36_00702	86.99	127.006	95.762	41	77.677	49.999
KAI36_00703	85.01	86.994	90.238	61	67.323	65.001
KAI36_00704	12.621	23	13	30	42.853	27.633
KAI36_00705	64.379	88	119	170	274.147	184.367
KAI36_00706	249	255.016	336	83	194	174
KAI36_00707	5608.59	7979.8	7965.73	1255	2023	2705
KAI36_00708	909	1032.2	1065.76	149	230	264
KAI36_00709	219	367	425	6927.98	6590.48	3189
KAI36_00710	136	149	138	18	19	21
KAI36_00711	3	9	2	2	2	5
KAI36_00712	0	2	0	1	1	0
KAI36_00713	1	4	4	17	18	16.998
KAI36_00714	2	3	7	10	18	12.002
KAI36_00715	65	98	89	271	308.987	206
KAI36_00716	6	16	14	9	16.013	12
KAI36_00717	13	12	17	4	14	7
KAI36_00718	14	18	31	29	40	43
KAI36_00719	455	540	630	670	1065	633
KAI36_00720	393	459	502.012	582	638.957	332
KAI36_00721	1390.37	1822.92	2461.45	2465.97	3570.51	2019
KAI36_00722	2448.63	3312.95	3216.54	3583.03	4377.53	3058
KAI36_00723	3562	4695	5098.4	2600.18	3519.11	1730
KAI36_00724	42.595	63.684	70.724	36	37	21.998
KAI36_00725	339.405	350.316	459.342	305	444.372	327.002
KAI36_00726	563.731	695	650	1199	1448	1182
KAI36_00727	352.778	430.859	449	498.006	582.727	292.514
KAI36_00728	856.223	1140.14	1110	1055.77	1317.27	624.486
KAI36_00729	46	56	49	95	142.996	87
KAI36_00730	27	41	44	63	118.004	38
KAI36_00731	40	22	32	40	94	58
KAI36_00732	14	13.882	14	15	11.282	14
KAI36_00733	10	11.118	8	9	11.718	10
KAI36_00734	258.408	341	389.517	348	406	288
KAI36_00735	8278	10899.9	12613.3	9186	15474.4	12496.5
KAI36_00736	1905	2685	2910	2445	3347.78	2518
KAI36_00737	119	112	116	65	106	41
KAI36_00738	75.55	91	74.516	65	81.091	45
KAI36_00739	492.398	437	481.28	294	489.891	260
KAI36_00740	523.545	591.364	596.163	701.362	1004.07	771.721
KAI36_00741	1674.51	2008.64	2260.78	3034.64	4446.93	2829.26
KAI36_00742	113	132	183	112	264	113
KAI36_00743	7	9	15	14	32	63
KAI36_00744	630.047	611	549	327	472	297
KAI36_00745	165	217	244	157	221	204
KAI36_00746	60	82	93	86	92	55
KAI36_00747	188	271	168	18	6	16
KAI36_00748	67	45	80	86	186	131
KAI36_00749	7156	8822	10700	4573	6340	3672
KAI36_00750	697.106	876.849	972.042	511.451	723.827	414.404
KAI36_00751	1123.89	1226.15	1498.71	1629.55	2354.16	1262.6
KAI36_00752	131.999	154.756	169.007	147.842	214.703	99
KAI36_00753	777.23	844.623	957	711.158	870.308	378
KAI36_00754	1633.65	1701.19	1781.11	1968.99	2683.84	1499.44
KAI36_00755	403.167	428.814	430.889	493.005	712.158	430.563
KAI36_00756	40.002	27	46.622	63	89.003	50
KAI36_00757	19	36	19.378	21	19	14
KAI36_00758	3	1	5	5	20	9
KAI36_00759	6	6	2.252	4.216	6.239	6
KAI36_00760	2	7	4.748	8.784	13.761	8
KAI36_00761	12	12	6	13	12	9
KAI36_00762	12	6	9	17.089	25	13
KAI36_00763	7	11	5	14.911	16	21
KAI36_00764	42	40	51	36	56	48
KAI36_00765	1553	2107.41	2611.88	2652	3706.03	2340
KAI36_00766	2731	3484.59	3292.61	1524	1798.96	1319
KAI36_00767	356.147	378.067	448.494	612.102	787.725	390.518
KAI36_00768	130.249	140.312	145.037	237.034	255.089	140.495
KAI36_00769	185.917	205.621	225.12	322.539	424.295	251.686
KAI36_00770	195.687	217	246.348	491.325	536.891	349.301
KAI36_00771	2	4	7	2	3	3
KAI36_00772	0	0	1	0	2	0
KAI36_00773	4	3	5	7	6	8
KAI36_00774	2.192	6	10	4	21	14
KAI36_00775	7.808	9	8	4	9	3
KAI36_00776	10	20.006	13	12	13	14
KAI36_00777	155	230	230	93	111	68
KAI36_00778	3113.43	3578.01	4214	7679.04	11581	6334.2
KAI36_00779	22	36	34	61	76	53
KAI36_00780	51	70	68	108	128	80
KAI36_00781	125	127	151	93	121.999	52
KAI36_00782	77	115	102	122	173.001	112
KAI36_00783	74.558	89.636	81.219	27.511	50.995	25
KAI36_00784	270.709	285.364	261.789	104.489	142.005	87
KAI36_00785	65.303	57	76.008	25	38	25
KAI36_00786	385	273	288	1214	381	293
KAI36_00787	0	0	0	0	0	0
KAI36_00788	0	0	0	0	0	0
KAI36_00789	#N/A	#N/A	#N/A	#N/A	#N/A	#N/A
KAI36_00790	972.29	1326	1284	1063.03	1912.09	432
KAI36_00791	8257.35	10126.4	11316.3	6654.59	13183.8	3719
KAI36_00792	18	24	32.992	18	66	24
KAI36_00793	35	64	68	831.161	1150	3613
KAI36_00794	477.492	616.077	467.208	269.578	252.429	230.37
KAI36_00795	946.508	1273.92	1482.79	767.998	1046.57	667.63
KAI36_00796	675.062	646.087	788.603	147.719	120	53.734
KAI36_00797	1480.32	1445.54	1628.04	292.849	290.607	162.265
KAI36_00798	1728.62	1644.38	1850.29	349.432	436.392	233.001
KAI36_00799	1122.24	985.577	1061.14	179.756	203.42	111.118
KAI36_00800	190.451	179.836	223	35.795	35.484	22.882
KAI36_00801	475.32	440.532	453.39	87.498	119.379	46.362
KAI36_00802	2412.2	2094.35	2500.21	487.546	564.622	284.638
KAI36_00803	1717.78	1627.7	1669.26	273.405	361.095	197
KAI36_00804	1154.73	1026.21	1111.56	201.997	317.001	153
KAI36_00805	415.273	405.875	452.442	82.003	110.999	38
KAI36_00806	1421.41	1351.14	1377.64	330.599	420.586	183
KAI36_00807	1462.59	1322.88	1430.94	288.401	358.414	179
KAI36_00808	269	292	337	124	230	145
KAI36_00809	11	24	18	85	150	126
KAI36_00810	102	118	117	189	318	207
KAI36_00811	132	165	153.53	75	296.611	91
KAI36_00812	136.565	212.745	211.47	173	1086.09	186
KAI36_00813	76.913	87.917	114.687	59	296.67	50.054
KAI36_00814	95.522	128.08	129.313	67	393.711	88.946
KAI36_00815	52	88.003	81	90	445.714	91
KAI36_00816	303	343	388	174	182	110
KAI36_00817	382.38	396.056	545.091	310.972	256.298	143.689
KAI36_00818	436.414	419.944	634.474	437.554	376.203	167.34
KAI36_00819	1245.21	1242	1428.42	4625.47	4472.7	2001.97
KAI36_00820	129.564	121.689	157.024	52	102	48.463
KAI36_00821	288.436	384.311	383.985	143	220	142.537
KAI36_00822	962.025	1468.99	1624.23	865.07	1350.63	746.668
KAI36_00823	10459.6	15411.8	17696.5	9268.97	12628.5	7966.31
KAI36_00824	76.13	84.132	109.198	78.003	114.995	54.659
KAI36_00825	75.87	73.868	83.802	36.997	56.005	34.341
KAI36_00826	59	60.973	77	77.173	121	90
KAI36_00827	18	20.027	18	22.827	37	44
KAI36_00828	19	24	31.995	56.734	85.655	35.998
KAI36_00829	11	11.997	18.007	11.266	21.345	19.002
KAI36_00830	11	12.003	10.998	20	17	25
KAI36_00831	1803.75	2043	2197.67	2119	3035.51	1587
KAI36_00832	30	41	55	83	50	49
KAI36_00833	41	34	35.511	38	41	9
KAI36_00834	34	28	40.489	46	33	13
KAI36_00835	27	25	34	76	66	31
KAI36_00836	126	112	102	143	245	148
KAI36_00837	4	6	6	3	4	27
KAI36_00838	1077.96	1273.32	1318.68	288.126	6417.91	85
KAI36_00839	2782.04	3428.68	4009.32	1591.87	9797.01	1214
KAI36_00840	158	163	128	123	100	71
KAI36_00841	118	152	157	4554.29	4472.02	3802
KAI36_00842	422	517	589.401	529	518	359
KAI36_00843	450.092	440.977	554.725	1093.52	1179.56	1141.95
KAI36_00844	650.908	657.023	800.275	1406.48	1478.44	1377.05
KAI36_00845	255.315	217.283	262.999	1458.46	1883	1216.91
KAI36_00846	213.685	274.745	307.001	1166.54	1896	1445.09
KAI36_00847	113	95	134	595	767	685
KAI36_00848	238	288	289	39	50	25
KAI36_00849	5	3	8	6	2	1
KAI36_00850	331.461	377.451	402.656	611.894	689.029	450.473
KAI36_00851	508.758	668.549	785.349	793.945	1242.97	656.527
KAI36_00852	455.316	597	629	254.161	373	240
KAI36_00853	1505.45	1874	2011.18	716	1466	976
KAI36_00854	61	77	78	61	83	60
KAI36_00855	9	6	4	11	9	13
KAI36_00856	42	35	39.666	27	37	47
KAI36_00857	59.622	70.119	58.781	54.302	55.806	66.65
KAI36_00858	851.378	1138.88	1073.67	770.739	900.194	491.197
KAI36_00859	16	26	30	21	30	15
KAI36_00860	1	10	13	9	24	7
KAI36_00861	195	256	249.277	242	364.292	183
KAI36_00862	81	116	78.723	113	148.708	92
KAI36_00863	25	24	26	22	26	25
KAI36_00864	20	20	25	16	22	4
KAI36_00865	21	20	20	24	57	44
KAI36_00866	8	7	7	7	15	4
KAI36_00867	46	68	70	98	148.008	62.926
KAI36_00868	291.181	346.004	401.793	324	374.636	192.649
KAI36_00869	501.04	633.729	544.703	476.396	647.567	331.354
KAI36_00870	213.051	239.393	257.958	345.446	479.712	237.467
KAI36_00871	178.728	212.871	250.064	335.743	503.085	334.53
KAI36_00872	461	530	579.115	681	893	582
KAI36_00873	183	220.002	190	156	330	175
KAI36_00874	338	449.205	366.525	485	940.116	576.441
KAI36_00875	70.592	83.244	71.674	121.435	252.251	118.932
KAI36_00876	241.65	308.66	279.801	400.958	691.819	424.088
KAI36_00877	37.757	30.889	30	62.607	79.806	57.613
KAI36_00878	3	2	5	6	14	16
KAI36_00879	11	18	21	14	20	14
KAI36_00880	37	49.997	53.387	15	18.124	22
KAI36_00881	754	965.997	1227.61	644	1026.88	651
KAI36_00882	12.695	11	10	23	35.601	28
KAI36_00883	12.305	12.813	9	23.999	28.882	19.615
KAI36_00884	20.432	25.187	35	52.995	109.529	59.385
KAI36_00885	52.568	45.284	40.142	75.942	155.785	96
KAI36_00886	18	20.716	20.858	52.064	50.203	29
KAI36_00887	14	21	15	9	23	6
KAI36_00888	12	20	19	31	33.769	35
KAI36_00889	11	6	7	16	15.231	20
KAI36_00890	519	691	707	2874	3834	2117.03
KAI36_00891	98	118	127	273	356	371
KAI36_00892	280	245	239.912	2200.58	3282.78	2385
KAI36_00893	89	129	128	251	360	230.002
KAI36_00894	96	152	148	66	55	41
KAI36_00895	51	61	39	134	152	81
KAI36_00896	229	310	318	375	472	237
KAI36_00897	477.966	463.205	565.397	121.853	135.256	133.723
KAI36_00898	448.034	474.938	506.603	53.147	58.744	49.277
KAI36_00899	49	73	85	292	1193	509
KAI36_00900	21.594	18.393	18	12	21.348	16
KAI36_00901	16.406	20.607	18	23	37.652	12
KAI36_00902	724.553	916.869	915.853	361.669	544.994	340.347
KAI36_00903	494.447	629.131	693.147	203.331	329.006	186.653
KAI36_00904	79	84	70.493	112	189.995	111.47
KAI36_00905	143	151	155.507	392	689.005	453.53
KAI36_00906	1907.59	2566	2897	1814	2693.14	1217
KAI36_00907	740.964	982.432	890.171	168	2618.85	16
KAI36_00908	308.51	347.938	322.248	128.257	1774.84	0
KAI36_00909	975.516	1174.03	1226.02	793.048	7550.95	43.006
KAI36_00910	2569.01	3087.65	3578.38	3018.29	17389.4	101
KAI36_00911	26	21	39	37	150.823	37
KAI36_00912	19	37	20	37	59	80
KAI36_00913	22	17	28	29	34	36
KAI36_00914	0	4	0	10	4	7
KAI36_00915	28	37	39	29	35	43
KAI36_00916	19	18	21	81	98	96
KAI36_00917	177	253	242	324	391.93	264
KAI36_00918	477	607	593	2385	2516.25	1566
KAI36_00919	321	344	320	956	1050	707
KAI36_00920	137	140.84	185	64	108	66
KAI36_00921	154	151.16	182	107	178	130
KAI36_00922	65	78	68	146	309	275
KAI36_00923	154	171	219	107	389	80
KAI36_00924	128	174	196	170	312.925	111
KAI36_00925	204	270	323	251	397.075	181
KAI36_00926	115.599	143	150.712	97.569	197.323	100.718
KAI36_00927	223.401	246	250.288	112.431	201.677	81.282
KAI36_00928	54	43.143	48	60	68	74
KAI36_00929	88.352	88.861	103.997	60.022	57.657	55
KAI36_00930	384.239	391.999	400.837	240.501	267.657	144
KAI36_00931	1647.89	1723.44	1732.2	531.977	756.789	424.444
KAI36_00932	670.518	768.556	896.971	315.5	382.897	267.556
KAI36_00933	35	21	23	53	39.004	33.746
KAI36_00934	76.916	82	78.434	154.249	147.09	79.792
KAI36_00935	23.084	11	29.566	44.751	40.906	20.462
KAI36_00936	328.687	369.029	375.566	136	310.31	221.343
KAI36_00937	123.313	139.971	131.434	58	162.69	85.657
KAI36_00938	266	294	255.203	227	389	382
KAI36_00939	340.088	361	335.736	33	59	65
KAI36_00940	3205.91	3906	4256.09	1093	1557.11	1155
KAI36_00941	22	44	41	22	25	16
KAI36_00942	93	127	141	107	180	108
KAI36_00943	0	0	0	2	0	1
KAI36_00944	13	12	11	1	6	3
KAI36_00945	51	51	51	36	87	38
KAI36_00946	14	17	22	24	28	28
KAI36_00947	81	56	91	84	100	85
KAI36_00948	4	7	3	9	17	6
KAI36_00949	624	566.748	655	420	445	215
KAI36_00950	242.54	208.252	252.195	88	70.52	25
KAI36_00951	281.457	210.35	266.508	57.505	72.48	32
KAI36_00952	245.536	259.022	310.297	53.077	62.001	29
KAI36_00953	162.466	145.628	153	23.418	26.999	11
KAI36_00954	239	222	263	115	70	23
KAI36_00955	377.77	325.152	385.55	188	119.994	55
KAI36_00956	341.869	319.848	332.712	279	144.823	63
KAI36_00957	102.574	85.547	79.913	86.572	50.184	22
KAI36_00958	121.012	123.028	117.307	154.727	72.001	45.062
KAI36_00959	300.983	309.425	359.518	355.701	272.999	172.938
KAI36_00960	141	173	201	222	324	199
KAI36_00961	55	69	75	19	30	16
KAI36_00962	44	38	44	18	28	20
KAI36_00963	0	0	0	0	0	1
KAI36_00964	4770.14	5905.46	7485.15	5069.19	8828.46	7627.81
KAI36_00965	521.206	597.537	634.853	761.814	778.574	741.192
KAI36_00966	356	446.003	477.195	310.996	420	211
KAI36_00967	255	386.997	399.805	592.004	887.142	535
KAI36_00968	681	920	982	173	181	159
KAI36_00969	19	24	17	17	15.347	13.176
KAI36_00970	133	160	172	158	209.653	189.824
KAI36_00971	387.923	523.09	539.185	667.391	795.786	376.962
KAI36_00972	1419.63	1714.72	1873.97	1658.69	2478.11	1112.06
KAI36_00973	1480.62	1762.39	2023.61	2910.7	4135.17	1960.24
KAI36_00974	2380.68	2928.55	2791.24	3795.95	5464.53	3119.01
KAI36_00975	1700.23	1934.04	2111.43	2209.07	3382.93	1429.54
KAI36_00976	349.921	436.091	502.139	675.184	883.656	420.549
KAI36_00977	200.824	261.458	242.545	168.494	242	107
KAI36_00978	280.176	333.542	307.876	218.506	340.536	180.889
KAI36_00979	183.414	224.556	225.234	183	296.978	119.479
KAI36_00980	226.264	260.468	172.795	159	201.19	107.118
KAI36_00981	185.26	218.082	259.05	210.164	284.997	173.514
KAI36_00982	735	1019.89	1033.5	480.836	639.551	464
KAI36_00983	1526	1986	2115	1760.27	2174.75	1521.72
KAI36_00984	0	0	0	0	0	0
KAI36_00985	753	925.609	977.999	1001	975.638	756.294
KAI36_00986	678	764.391	803	1358	1449.38	1245.71
KAI36_00987	146.787	169.68	246.857	719.031	1353.59	20.823
KAI36_00988	1480.21	1801.28	2139.14	6468.98	13908.2	116.177
KAI36_00989	0	0	1	0	0	0
KAI36_00990	259.563	231.309	301.84	93.616	1502.28	6
KAI36_00991	305.437	311.691	367.161	57.384	1263.72	4
KAI36_00992	271.339	360.142	351	303	892.919	846.616
KAI36_00993	172.975	249.6	289.842	304.444	537.417	555.541
KAI36_00994	466.686	545.258	599.158	548.492	1016.66	1052.84
KAI36_00995	4	2	2	1	3	2
KAI36_00996	12	13	17	15	25	10
KAI36_00997	0	0	0.893	0	0	0
KAI36_00998	20	17	28.107	10	9	9
KAI36_00999	4	4	5	2	0	0
KAI36_01000	93	79.419	109	23.568	18	21
KAI36_01001	11	29.581	19	7.432	4	3
KAI36_01002	9	12	16	1	3	1
KAI36_01003	1	2	2	5	5	1
KAI36_01004	1	0	2	1	1	0
KAI36_01005	22	20	34	11	27	21
KAI36_01006	60	85	89	114.036	134	95
KAI36_01007	330	425	432	330	647.545	469
KAI36_01008	12	32.32	26	20	38.051	25
KAI36_01009	9.921	6.209	9	24.65	31.322	16
KAI36_01010	1.079	4.471	2	11.35	15.627	11
KAI36_01011	63	65	68	56	51	39
KAI36_01012	33.481	46	50.438	28	26.998	16
KAI36_01013	37.519	34	51.562	22	23.007	12.001
KAI36_01014	17	27.329	24	5	19	11
KAI36_01015	18	33.671	32	11	14	10
KAI36_01016	6	4	2	1	4	2
KAI36_01017	8	12	6	6	4	1
KAI36_01018	3	6	4	2	5	4
KAI36_01019	18	21	20	23	23	10
KAI36_01020	13	17	19	10	13.612	12
KAI36_01021	14	14	13	11	13.388	9
KAI36_01022	9	6	12	9	10	7
KAI36_01023	17	17.192	18.498	25	17	14.999
KAI36_01024	2	3.808	1.502	0	1	1.001
KAI36_01025	0	0	2.001	5	5.826	4
KAI36_01026	13	13	25.877	18	21.174	15
KAI36_01027	56	56	70.122	52	55	38
KAI36_01028	39	64	50.882	151.947	224.88	96.024
KAI36_01029	27	42	36.118	51.053	84.12	39.976
KAI36_01030	20	32	34	14	15	12
KAI36_01031	38	48	66	12	28	18
KAI36_01032	24	29	46	18	25	15
KAI36_01033	13	15	17	3	19	19
KAI36_01034	64.113	73.297	63.64	96.642	103.435	115.585
KAI36_01035	181.419	260.405	253.313	164.126	296.386	158.047
KAI36_01036	175	264	236	359	437	368.001
KAI36_01037	3	0	2	0	5	4
KAI36_01038	96	90	70	99	143	106
KAI36_01039	17	20	22	623	422.997	360.431
KAI36_01040	8	9	13	238	189.003	205.569
KAI36_01041	30.482	15	34	504.492	386.997	345.997
KAI36_01042	37.518	19	34	639.508	495.003	449.003
KAI36_01043	18	20	31	390.378	371.536	339.055
KAI36_01044	13	20	24	422.622	341.705	289.945
KAI36_01045	6	4	8	67	59.759	40
KAI36_01046	18	11	14	293.325	217.995	172.33
KAI36_01047	22	27	30	363.675	303.005	235.67
KAI36_01048	485.542	505.811	653.309	270.399	344.52	148.57
KAI36_01049	709.458	841.189	985.752	406.601	491.48	268.43
KAI36_01050	1744	2522	2595.67	34	56	27
KAI36_01051	6	11	6	0	0	0
KAI36_01052	883.769	1188.25	1312.91	25	25.111	16.084
KAI36_01053	821.236	1077.59	1147.21	92	118.9	91.916
KAI36_01054	1455	1808.33	2028.5	174	252	190
KAI36_01055	19	19	20	6	12	7
KAI36_01056	53.993	91	89	71	91.465	69
KAI36_01057	197.311	266.762	246.36	109.358	165.544	101
KAI36_01058	261.696	273.238	365.64	154.642	212.992	96
KAI36_01059	279	312	362	227	308	187
KAI36_01060	34	34	37	49	68	47.019
KAI36_01061	0	0	0	0	0	0
KAI36_01062	34	46	46.728	43	70	60
KAI36_01063	692	918	1010	685	1077	485
KAI36_01064	1247.06	1451	1526	1309	1810	767
KAI36_01065	39.808	48.851	39.867	83.795	82.999	47.604
KAI36_01066	59.192	70.965	76.133	166.205	221.972	99.396
KAI36_01067	160	218.181	225	612	788.029	426
KAI36_01068	3	3	2	2	1	0
KAI36_01069	310	319	338	226	251.005	145
KAI36_01070	670.71	690.842	759.813	369.76	501.607	281.39
KAI36_01071	404.17	468.678	561.4	278.786	430.057	239.95
KAI36_01072	294.12	327.481	317.787	175.454	264.332	159.66
KAI36_01073	156	139	157	913	1840	684
KAI36_01074	18	24	29	110	92	83
KAI36_01075	4628.61	5827	5849	13032.3	24367.4	17157.3
KAI36_01076	85	92	102	124	185	107
KAI36_01077	263	311	324	113	151.255	103
KAI36_01078	26	50	54	49	79	58
KAI36_01079	230.997	289.574	338.767	162.876	203.985	113
KAI36_01080	536.003	612.426	644.233	77.124	140	81
KAI36_01081	396	424	402	3345	5450.47	2979
KAI36_01082	211	293	222	192	174	171
KAI36_01083	40	71	87	35	53	27
KAI36_01084	1164.32	1386	1536	19	25	14
KAI36_01085	160	149	198	58	129	93
KAI36_01086	215	203	246	13	21	19
KAI36_01087	1155	1397	1842	1877	2661	1858
KAI36_01088	1	4	1	0	1	2
KAI36_01089	389	460	422	365	519.586	331
KAI36_01090	220.005	335	302	49	83	51
KAI36_01091	47	81	58	60	69	95
KAI36_01092	22	22	30	24	28	27
KAI36_01093	163	236	273	254	350	259
KAI36_01094	10	20	25	68	167	249.05
KAI36_01095	1143	1411	1700	4391.98	7486.35	4250
KAI36_01096	529.707	647.784	684.535	630.512	861.397	409.95
KAI36_01097	388.252	434.296	486.567	460.734	664.115	314.191
KAI36_01098	462.064	537.92	601.899	696.754	956.541	626.858
KAI36_01099	1309.09	1433.97	1079.22	40	28.957	30.898
KAI36_01100	443.914	513.034	413.836	13	12.043	7.102
KAI36_01101	33	47.287	35	17	14	5
KAI36_01102	284	336	358	642.015	683	378
KAI36_01103	3667.82	4876.52	5579.9	11010	10911.9	6599.02
KAI36_01104	3559.24	4045.52	4223.09	3564.44	5136.08	2179.55
KAI36_01105	37	28	42	105	246	221
KAI36_01106	25	25	29	17	45	50
KAI36_01107	74	98	121	49	83	36
KAI36_01108	87	95	117	152	156	39
KAI36_01109	33	35	32	37	48	49
KAI36_01110	234	304	324.992	1393.99	1466	740.796
KAI36_01111	40	40	23.008	59.005	30.003	34.204
KAI36_01112	16	13	15	20	24	21
KAI36_01113	2253.12	3265.52	3852.55	69	57	39
KAI36_01114	39	29	21	21.772	31.698	10
KAI36_01115	82	76.737	91	14.228	24.302	15
KAI36_01116	83	87.263	82	16	30	19
KAI36_01117	178	214	305	269	290	76
KAI36_01118	15	14	23	42	52	57
KAI36_01119	6	5.962	10	14	14	8
KAI36_01120	36	46.038	41	20	30	26
KAI36_01121	1	2	3	0	1	3
KAI36_01122	0	1	1	0	1	0
KAI36_01123	1	0	0	1	4	0
KAI36_01124	42	42	54	58	61	32
KAI36_01125	34	41	42	15	39.002	20
KAI36_01126	49	56	54	54	111	37
KAI36_01127	123	152	164	213	255	219
KAI36_01128	464	550	668	701	1220	552
KAI36_01129	98	146	129	212	342	232
KAI36_01130	35	59	50	49	71	56
KAI36_01131	12.265	21	13	18	18	10
KAI36_01132	45.735	58.465	65.532	32	43.348	33.587
KAI36_01133	52	64.535	80.468	38	63.652	31.413
KAI36_01134	96	90	99	120	166	94
KAI36_01135	180	176	175	48	75	82
KAI36_01136	509.617	504.454	590.815	214.131	276.7	317.818
KAI36_01137	168.389	167.422	212.276	71.41	110.548	99.86
KAI36_01138	386.994	372.124	416.909	178.46	224.752	232.321
KAI36_01139	289.286	330.295	391.298	190.694	256.535	219.548
KAI36_01140	269.714	307.705	304.702	115.306	175.466	122.452
KAI36_01141	12	23	16	6	7	0
KAI36_01142	36.523	57.271	50.676	81.003	94.222	56
KAI36_01143	56.477	52.729	49.324	81.997	103.778	46
KAI36_01144	270.023	279	312	441	580	264
KAI36_01145	807	1016	1081	2132	3545	1853
KAI36_01146	116.859	106.629	129.589	38	61.415	41
KAI36_01147	179.141	126.371	186.411	64	68.585	34
KAI36_01148	46	60	77	65	63	70
KAI36_01149	1264.8	2157.22	2323.56	715.132	1523.3	3006.53
KAI36_01150	93.203	132.024	98.444	67.871	110.722	236.727
KAI36_01151	591	929.936	1003.46	932.392	1953.7	3558.74
KAI36_01152	64	101.525	65.506	84.076	131.033	233.029
KAI36_01153	54.537	120.475	97.998	110.529	188.47	307.974
KAI36_01154	698.463	1019.19	875	431	770.491	1226
KAI36_01155	100.526	163.986	158.897	81.525	103.348	188.825
KAI36_01156	318.982	416.395	449.283	189.925	329.826	561.524
KAI36_01157	113.881	170.93	146.926	68.544	116.675	235.762
KAI36_01158	126.52	192.111	151.412	110.858	153.672	278.265
KAI36_01159	220.084	366.578	339.742	262.553	539.295	900.581
KAI36_01160	192.008	263	229.417	138.598	267.393	476.335
KAI36_01161	634.739	954.307	989.315	752.574	1335.44	2254.79
KAI36_01162	225.676	321.34	296.093	172.416	365.86	704.022
KAI36_01163	29.585	72.353	57.397	48.006	61	93.899
KAI36_01164	21	36	27	26	39	80
KAI36_01165	109	164	148	128	206	414
KAI36_01166	133	147	177	196	297	174
KAI36_01167	5	21	32	57	79	18
KAI36_01168	18	19	23	31	41	9
KAI36_01169	7	10	12	16	20	8
KAI36_01170	10.997	9.413	17	18.374	20	15
KAI36_01171	6.003	13.103	7	18.626	27	10
KAI36_01172	110	129.48	155.198	164	212.291	79
KAI36_01173	83	100.004	144.802	125	138.709	84
KAI36_01174	15	21	32.714	44	61	45.792
KAI36_01175	15	28	30.286	44	41	31.208
KAI36_01176	36	62	60	82	80	45
KAI36_01177	18	24	28	32	43	30
KAI36_01178	105.384	114	125	154.549	179	109
KAI36_01179	16.616	10	19	35.451	23.536	18
KAI36_01180	135	176	201.033	181	280.464	135
KAI36_01181	140	135	174	95	137	66
KAI36_01182	135.003	152.512	177	1922.26	3852.86	1569.06
KAI36_01183	83.577	97.488	132	1268.9	2472.74	1119.09
KAI36_01184	90.42	81	92	1062.5	1875.41	956.85
KAI36_01185	350	387	391	889	1363	700.802
KAI36_01186	110.002	117.718	159.495	263	396.819	239.199
KAI36_01187	133.998	123.35	151.505	368	642.181	340.234
KAI36_01188	776	926.932	1119.09	894	1117	622.765
KAI36_01189	132.416	188.487	183.48	144	219.54	131.69
KAI36_01190	456.584	534.513	585.52	151.077	361.46	250.31
KAI36_01191	3115.57	4568	4770.01	1053	1408	933
KAI36_01192	10387	11691	13186.6	8786	16745.2	8532.7
KAI36_01193	7577.3	9538.5	10484.1	2684.04	3031	1632
KAI36_01194	1086	1515.5	1674.07	789	925	530
KAI36_01195	1384.67	1608.04	1945.96	1002.39	842.118	496
KAI36_01196	918.065	1083.03	1396.29	558.924	453.984	192.516
KAI36_01197	2306.14	2798.92	3274.97	1422.68	1440.06	877.493
KAI36_01198	855.074	931.878	1240.2	763.784	685.225	373.261
KAI36_01199	1531.3	1670.4	2272.54	1235.62	1004.35	544.314
KAI36_01200	1341.13	1389.43	1742.24	1009.29	690.947	435.814
KAI36_01201	820.881	913.636	921.722	392.741	346.937	214.381
KAI36_01202	1686.5	1894.56	2400.86	1083.82	827.893	479.278
KAI36_01203	1286.27	1297.96	1642.53	769.309	579.425	340.944
KAI36_01204	730.288	765.421	845.495	389.311	350.286	224.763
KAI36_01205	1429.64	1519.09	1684.38	609.616	549.34	310.223
KAI36_01206	1558.73	1662.73	2048.01	883.118	696.28	475.608
KAI36_01207	854.812	989.518	1039.45	589.477	445.312	263.407
KAI36_01208	1457.58	1602.18	1929.74	1122	826.44	627
KAI36_01209	2344	2684.48	2779.48	1188.01	1091	859
KAI36_01210	1309.76	1376.65	1416.16	634.662	538	329
KAI36_01211	1012.24	960.339	1077.36	408.345	368.001	210
KAI36_01212	9	5	14	19	28	11
KAI36_01213	162	212	197	143	206	153
KAI36_01214	367.676	355.699	388.582	149	198.006	187.003
KAI36_01215	114.324	123.301	123.418	56	69.994	79.997
KAI36_01216	95.472	100.628	119	110.687	100.237	97.776
KAI36_01217	164.692	137.372	192.413	211.313	237.77	203.224
KAI36_01218	304.835	277	345.157	340.022	448.993	466
KAI36_01219	144.526	180.109	208.63	136.001	214.381	158.481
KAI36_01220	192.475	193.002	207.8	180	197.619	176.519
KAI36_01221	186.751	182.768	214.704	156	171.245	175.303
KAI36_01222	169.249	155.752	191.778	148.261	160.832	150.068
KAI36_01223	118	104.092	115.518	79.739	113.398	124.624
KAI36_01224	219.966	216.003	231.611	209	243.538	257.082
KAI36_01225	80.439	88.385	95.389	94	122.987	116.923
KAI36_01226	16.595	15	5	6	15	11.012
KAI36_01227	1378.58	1819.82	1859.74	1189.64	1517.22	743.641
KAI36_01228	613.416	831.18	953.262	1060.36	1337.7	582.359
KAI36_01229	167	207	205	38	36	34
KAI36_01230	4	4	3	4	4	11
KAI36_01231	0	0	2	8	18	37
KAI36_01232	46	64	57	34	42	30
KAI36_01233	328	418	454	231	314	197
KAI36_01234	3	4	4	2	2	1
KAI36_01235	529.794	507.811	593.019	226.998	286.322	245.361
KAI36_01236	439.206	398.189	520.981	320.002	442.679	348.639
KAI36_01237	70	65	40	43	42	68
KAI36_01238	176.343	181.357	192.107	208.001	252.975	257.269
KAI36_01239	44.657	38.333	36.893	34.999	30.782	46.5
KAI36_01240	85.603	74.127	77	83.676	70.519	74.232
KAI36_01241	253.397	237.182	257	187.324	345.723	267
KAI36_01242	181	136	181	119	178	133
KAI36_01243	39	44	47	64	82	76
KAI36_01244	291	319	319	276	323	289
KAI36_01245	2	5	2	0	4	4
KAI36_01246	2	1	2	1	2	2
KAI36_01247	4957.16	6136.79	6184.39	4565.11	3304.47	3289.36
KAI36_01248	5066.73	6578.86	5686.23	5165.49	3464.74	3287.64
KAI36_01249	5527.34	7145.72	7316.2	5260	4184.16	4642.04
KAI36_01250	8952.44	11338.6	12205.8	7869.16	6379.89	6434.78
KAI36_01251	359	437	476	448	590	383
KAI36_01252	456.746	458.271	516.206	160.343	165.89	86.173
KAI36_01253	733.404	816.693	928.034	412.306	732.39	298.581
KAI36_01254	454.465	500.518	484.097	285.66	468.148	225.689
KAI36_01255	1296.38	1795.52	1862.73	1213.69	2033.57	1116.46
KAI36_01256	2063	2803	2794.48	1099.54	1911.24	1171
KAI36_01257	1521.56	1819.38	1864.57	951.005	1062.79	484.452
KAI36_01258	639.44	700.619	620.435	409.995	451.208	229.548
KAI36_01259	754.388	907.65	971.596	851.958	1271.92	625.989
KAI36_01260	157.61	175.35	206.404	202.042	266.036	145.011
KAI36_01261	242.001	274	301	153	249.047	107
KAI36_01262	1757.04	2009.92	1736.19	4055.44	5538.75	3214.37
KAI36_01263	15042.7	18031	21222.6	61503.7	92892.9	52096.5
KAI36_01264	2	3	5	3	3	2
KAI36_01265	9	1	2	4	6	2
KAI36_01266	2	4	4	4	3	9
KAI36_01267	0	0	0	0	0	0
KAI36_01268	0	0	0	0	0	0
KAI36_01269	1478	1795	2027.02	6561	6279.45	3960.79
KAI36_01270	33	36	52	250.993	431	377
KAI36_01271	251	275	255	621	730	448
KAI36_01272	1.908	2	5	1	7	0
KAI36_01273	2.092	3	3	1	3	4
KAI36_01274	0	1	0	0	0	0
KAI36_01275	215	282	332	898	1076	674
KAI36_01276	11	25	18	31	31	16
KAI36_01277	519	835	758	3998.98	3715	1390
KAI36_01278	24	38	19	116	120.01	86.241
KAI36_01279	94.638	122.279	100	433.214	476.55	310.992
KAI36_01280	68.362	76.721	86	390.786	425.441	254.767
KAI36_01281	122	181	172	188	380	304.046
KAI36_01282	9	15	11	12	19	19
KAI36_01283	3	1	4	3	4	3
KAI36_01284	3	7	8	9	9	8
KAI36_01285	1	3	2	1	8	7
KAI36_01286	107	132	126	22	25	33
KAI36_01287	0	0	0	0	0	2
KAI36_01288	4	5	4	0	3.45	6
KAI36_01289	3	5	4	0	3.55	1
KAI36_01290	16	15	19	23	27	17
KAI36_01291	323.019	342.956	353.915	486.439	316.488	266.165
KAI36_01292	2471.88	3313	3905.15	3897.34	4080.18	3588.11
KAI36_01293	2085.11	2981.04	3677.35	2593.22	3136.41	2996.13
KAI36_01294	1303.45	997.185	1226.39	105	168.817	140
KAI36_01295	408.919	319.815	405.614	35	55.183	40
KAI36_01296	391	429	380	191	276	216
KAI36_01297	1726	2181	2512	575	752	441
KAI36_01298	64	68	66	71	113	81
KAI36_01299	1499	1914	2150.67	1130	2017.32	1013
KAI36_01300	42.576	45.781	46.488	83.609	175.672	106.667
KAI36_01301	66.424	59.798	88.512	125.391	221.329	139.333
KAI36_01302	53.274	61.421	73.368	135	189.003	99
KAI36_01303	46.726	50	52.632	70	97.997	52
KAI36_01304	28	51.084	45	68	62.125	33
KAI36_01305	17	16.916	18	65	90.875	56
KAI36_01306	409	512	594	450	660	243
KAI36_01307	242	283	320.026	158	156	82
KAI36_01308	13	11	18	28	32	20
KAI36_01309	5	4	5	1	2	3
KAI36_01310	51	55	47	30	53	43
KAI36_01311	3161	3635	4180.7	1950	2790	1390
KAI36_01312	1678.24	2160.18	2449.06	2461.35	3548.43	1731
KAI36_01313	1506.38	1930.73	2211.95	2408.66	3410.6	1728
KAI36_01314	3058.02	3823	4374	3409	5062	2951.02
KAI36_01315	147	225	188	57	51	54
KAI36_01316	#N/A	#N/A	#N/A	#N/A	#N/A	#N/A
KAI36_01317	3	6	3	1	0	1
KAI36_01318	118	131.455	139	206.407	286.602	173
KAI36_01319	109	108.545	137	137.593	132.398	82
KAI36_01320	#N/A	#N/A	#N/A	#N/A	#N/A	#N/A
KAI36_01321	#N/A	#N/A	#N/A	#N/A	#N/A	#N/A
KAI36_01322	0	0	0	0	0	0
KAI36_01323	115	139	182	329	455	345
KAI36_01324	81	112	74	35	38	19
KAI36_01325	86	101	67	30	20	22
KAI36_01326	1831	2629	2315.09	5094	5039.8	3014
KAI36_01327	38	43	61	302	169	440
KAI36_01328	0	4	1	0	1	0
KAI36_01329	244	353	315	150	236.999	145
KAI36_01330	286	223	238	763	791	661
KAI36_01331	1	2	0	11	8	6
KAI36_01332	1143.82	852.842	914.65	3739.01	4133.29	3226.85
KAI36_01333	2056.26	1506.03	1837.22	5261.94	6891.28	6514.19
KAI36_01334	824.042	612.132	868.175	2121.35	2970.81	3144.95
KAI36_01335	119.243	176.15	149	907.413	1352.99	379.59
KAI36_01336	53.757	55.85	62	771.587	851.006	419.41
KAI36_01337	1	4	3	82.765	42.424	40.399
KAI36_01338	8	6	8	136.235	96.576	63.601
KAI36_01339	37	51	55	231	289.282	162
KAI36_01340	86	98	91	222.496	325.69	177
KAI36_01341	510	637.704	626.051	947.546	1257.03	675
KAI36_01342	3725	4977	6300.56	4795	6449	4742
KAI36_01343	4847.75	6387.23	6458.92	173	179	128
KAI36_01344	667.494	731.737	811.227	1842	1407.69	1097
KAI36_01345	104.049	155	215.111	45	78	35
KAI36_01346	68	77	106.001	63	94	61
KAI36_01347	239	323	331	898.69	1149.1	621
KAI36_01348	151.737	203.135	198.2	167.812	270.421	196.784
KAI36_01349	115.307	151.214	186.919	74.232	93.825	108.216
KAI36_01350	165.957	220.652	222.881	87.266	80.657	122
KAI36_01351	392.109	454.997	457	333.007	322.009	253.002
KAI36_01352	23.891	34.003	41	333.993	402.991	591.011
KAI36_01353	9	5	10	10	8	3
KAI36_01354	6	8	7	2	7	4
KAI36_01355	2	1	3	1	1	0
KAI36_01356	6	12	3	8	5	8
KAI36_01357	0.893	1	1	0	1	2
KAI36_01358	2.107	4	6	1	1	1
KAI36_01359	6	9	9	7	6	5
KAI36_01360	4	3	2	7	4	2
KAI36_01361	6	4	4	1	4	3
KAI36_01362	27	27	37	28	30	24
KAI36_01363	268	331	381	150	354	162
KAI36_01364	1970.74	2220.78	2354.31	1937.21	2776.91	1480.15
KAI36_01365	1468.38	1742.96	1785.67	1550.79	2444.09	1403.85
KAI36_01366	9457.3	11470.7	12428.6	12258.2	17704.5	7066.82
KAI36_01367	652.023	811.712	790	834.803	833.999	352
KAI36_01368	1400	2126	2473.99	1602.02	2492.19	1445
KAI36_01369	10436.3	14525.7	16217.8	17149.5	26988.8	14591.5
KAI36_01370	948.073	1085.09	1072.06	835.953	1063.84	643.383
KAI36_01371	382.222	467.047	447.063	463.047	545.294	331.617
KAI36_01372	408.03	473	417	188	245	141
KAI36_01373	597	733	645.002	305	1341.06	98
KAI36_01374	320	321	347.998	119	214	96
KAI36_01375	170	198	216	123	237	99
KAI36_01376	45	39	48	37	73	33
KAI36_01377	2055.07	2686.57	2836.33	4778.91	8146.89	6122.89
KAI36_01378	2186.13	2963.98	3173.41	1812.09	2534.76	1788.11
KAI36_01379	325.026	358.475	393.504	301	377.308	161.547
KAI36_01380	241.358	311.468	316.368	226.023	302.083	155.179
KAI36_01381	164.616	251.056	252.129	227.977	288.609	148.273
KAI36_01382	1	0	0	0	1	1
KAI36_01383	495.931	574.231	609.513	429.912	632.237	284.153
KAI36_01384	285.434	335.768	379.804	272.397	352.762	170.847
KAI36_01385	352.134	404.577	375.315	297.69	389.729	184.998
KAI36_01386	474.185	573.26	676.864	539	784.409	368.392
KAI36_01387	164.551	200.19	236.87	170.006	251.516	112.807
KAI36_01388	205.529	206.352	254.208	157.557	268.827	106.271
KAI36_01389	401.237	495.621	488.259	445.437	761.52	347.634
KAI36_01390	152	168	159	4746	9135.97	4131.66
KAI36_01391	54	67	62	147	352	133
KAI36_01392	460	564	624.246	435	698	532
KAI36_01393	44	62	83	98	151	132
KAI36_01394	323.007	458	500.526	886	10603	186
KAI36_01395	87	65	100	53	144	72
KAI36_01396	4587.9	6643.01	6967.11	3215.54	4202.11	2648.45
KAI36_01397	1118.1	1536.99	1650.11	444.479	416.633	283.379
KAI36_01398	272	335	443	143	240	163
KAI36_01399	33	60.536	53.741	91	120.53	81.802
KAI36_01400	146.731	199.464	222.259	116	111.47	63.198
KAI36_01401	229.269	276	320	148	167	116
KAI36_01402	410.532	567.212	549	182	210.448	157
KAI36_01403	731	1047	1315	657	872.554	747
KAI36_01404	192	216	231	315	517	376
KAI36_01405	391	461.197	430	38	35	46
KAI36_01406	686	1029	1019	312	345	262
KAI36_01407	285	309	339	695	1037	620
KAI36_01408	2135.69	2695.71	3180.12	1036	1416.55	681.632
KAI36_01409	2055.41	2538.6	2586.88	2081	2886.45	1429.37
KAI36_01410	44	58	74	53	53	39
KAI36_01411	37.074	72.166	81.83	94.367	126.751	81.543
KAI36_01412	97.926	132.834	159.17	193.633	271.275	201.458
KAI36_01413	8	13	12	6	19	7
KAI36_01414	5	7	5	9	11	11
KAI36_01415	101	165	159	53	62	37
KAI36_01416	88.557	115.342	108.027	87.541	82.671	49.872
KAI36_01417	214.895	230.807	196.973	158.254	170.013	90.128
KAI36_01418	186.061	221.838	244.326	240.64	323.444	113.52
KAI36_01419	322.487	444.013	474.67	350.566	458.998	245.48
KAI36_01420	40	62.959	56	50	47.531	23
KAI36_01421	11	11.041	5	5	4.469	4
KAI36_01422	33	50	52	53	51	24
KAI36_01423	8.169	31	20	25	17	7
KAI36_01424	32.831	39	27	29	29	14
KAI36_01425	747	741	776	300	298.006	112
KAI36_01426	62.001	105.572	79	27	63	34
KAI36_01427	71	69.428	88	61	81	66
KAI36_01428	19	16	20	12	21	18
KAI36_01429	8	21	16	17	28	30
KAI36_01430	241	250	228	6	7	12
KAI36_01431	323	328	341	104	172	76
KAI36_01432	27.924	28	27	8	18.382	4
KAI36_01433	51.076	34	47	27	13.618	12
KAI36_01434	139	140	143	63	77	28
KAI36_01435	17	22	10.712	14	9	5
KAI36_01436	263.727	360.534	319.952	160	211.764	86.319
KAI36_01437	271.273	305.727	307.336	162	242.244	119.681
KAI36_01438	15.001	5	16.314	8.697	10.998	2.412
KAI36_01439	103.356	104.011	110.3	84.303	118.863	40.113
KAI36_01440	188.643	219.989	293.386	127	220.139	106.475
KAI36_01441	214	252	248	111	196	118
KAI36_01442	158.38	202.652	213.307	71	82.266	70
KAI36_01443	179.62	226.348	216.693	168	228.734	109
KAI36_01444	31.633	49.606	48.175	71.252	109.829	91.513
KAI36_01445	155.367	215.394	197.825	133.748	230.171	202.487
KAI36_01446	8	22	14	10	19	13
KAI36_01447	19	12.576	13	31	30.999	24
KAI36_01448	14	19.424	10	16	16.052	12.012
KAI36_01449	2	6	7	5	15.949	7.988
KAI36_01450	42	42	40	48	43	52
KAI36_01451	12	9	14	3	7	7
KAI36_01452	5.477	1	6	12	8.283	4
KAI36_01453	160.523	137	170	357	460.717	158
KAI36_01454	8379.81	9408.27	10365.4	3092.84	8400.67	1374.11
KAI36_01455	5056.46	6417.66	7873.83	3413.33	9047.5	1159.89
KAI36_01456	973	1310.52	1174.07	728.213	844	582
KAI36_01457	971.282	1155.73	1387.32	1942.68	2960.82	1362.84
KAI36_01458	1385.22	1733.27	1866.68	2664.95	3886.96	1868.16
KAI36_01459	332.509	400.576	445.796	280.381	475.394	220.458
KAI36_01460	612.988	722.424	882.207	395.619	717.884	315.542
KAI36_01461	85.89	119	155	48	197	162
KAI36_01462	262.11	275	274	396	870	724.988
KAI36_01463	1280.76	1571.13	1618.7	1082	1555.1	945.998
KAI36_01464	250.238	299.931	331.301	186.996	184.902	138.002
KAI36_01465	2833	2986.01	3691.32	3087	4647	3022
KAI36_01466	5828.34	6951	7635.73	8882.37	15854.2	11259.7
KAI36_01467	1718.79	2075.07	2385.24	3919.71	7383.73	6547.93
KAI36_01468	1704.87	2160.93	2592.84	8083.51	11120.6	12386.4
KAI36_01469	1403	1527	1557.11	8529.03	12677.6	8300.92
KAI36_01470	488.887	438.516	477.103	1954.13	2552.28	1633.13
KAI36_01471	137.39	157.046	179.87	939.618	1076.68	720.968
KAI36_01472	234.723	259.438	234	1375.18	1583.12	1465.96
KAI36_01473	3	1	1	14	15	23
KAI36_01474	1	2	0	1	1	1
KAI36_01475	2537.08	3056.73	3204.78	4912.91	6782.95	2762.97
KAI36_01476	486.891	627.281	622.692	1310.09	1750.22	828.032
KAI36_01477	2654.01	3508	3604.19	12026	17611.5	11041
KAI36_01478	1523.34	1924.38	2103.99	4018	5581.44	2686
KAI36_01479	196	243	253	246	346	168
KAI36_01480	7920.37	10264	11565	14296	20700.1	18382.3
KAI36_01481	1344	1682	1545	2232	2646.91	1842
KAI36_01482	595	754	787	1048	1214	533
KAI36_01483	451	518	521	542	826	415
KAI36_01484	1	0	0	1	0	0
KAI36_01485	569	794	738	336	376	350
KAI36_01486	527	589	617	645	885	602
KAI36_01487	485.319	484.003	535.974	1007	1727.85	715.216
KAI36_01488	1597.68	1808	1981.03	4106.02	6118.05	2984.78
KAI36_01489	4724.95	6147	6236	10194	14700.2	8961
KAI36_01490	3	3	0	9	25	52
KAI36_01491	3640.79	4220.34	4458.06	2250.2	3498.47	1768.57
KAI36_01492	175.794	170.011	157.177	76.796	107.77	71.016
KAI36_01493	1212.36	1574.56	1641.15	937	1461.95	813.419
KAI36_01494	162.059	205.092	225.013	75	122	79
KAI36_01495	83	119	119	8	11	20
KAI36_01496	2	1	5	12	34.474	65.775
KAI36_01497	14	18	14	38	47.526	115.225
KAI36_01498	1436.33	1928.68	2004.38	2173.56	2629.46	1414.78
KAI36_01499	2726.28	3614.9	4147.45	4019.7	5759.01	2929.43
KAI36_01500	328.393	421.744	408.584	722.752	688.049	368.792
KAI36_01501	130.463	149	120	81	93	59
KAI36_01502	112.889	138.383	133.783	102.322	117.721	89.775
KAI36_01503	414.47	499.816	486.659	308.678	421.855	270.225
KAI36_01504	60.641	85.756	66.793	50.267	66.221	37
KAI36_01505	766.003	908.045	978.287	571	827.203	498
KAI36_01506	237	301	273	856	945	514
KAI36_01507	3	7	7	21	28	12
KAI36_01508	435.017	564	696	760	1315	616
KAI36_01509	4212.26	4831.08	5092.13	631	4036.4	203
KAI36_01510	3830.96	4080.45	4320.21	1366.01	8586.46	218.198
KAI36_01511	3569.8	3939.55	4588.18	1986.99	10612.1	324.802
KAI36_01512	1632	2070	2276	3544	5998	4462.78
KAI36_01513	7	9	11	6	6	10
KAI36_01514	4	6	8	8	8	4.125
KAI36_01515	3	0	2	5	4	2.875
KAI36_01516	75	98	83	21	16	16
KAI36_01517	11	21	19	12.327	18	27
KAI36_01518	7	14	8	13.673	17	33
KAI36_01519	5	4	12	26	54	185
KAI36_01520	50002.6	71045	74437.7	4424	2974.21	2947
KAI36_01521	2120.95	2765.24	2554.09	303.883	266.336	155.379
KAI36_01522	3300.03	3960.31	3891.81	557.117	483.666	282.621
KAI36_01523	2829.19	3217.68	3741.19	892	1062	658.15
KAI36_01524	164	192	230	3543	2902	1986
KAI36_01525	1619	1506	1673.99	60957.3	79017.7	54573.9
KAI36_01526	1829.27	2063	2185.45	4289	6913	4239
KAI36_01527	28	31	35	37	65	47
KAI36_01528	42	40	37	327	261	246
KAI36_01529	550.734	654.013	802.619	365.496	479.657	265.433
KAI36_01530	294.266	385.987	351.381	169.504	171.343	115.567
KAI36_01531	229.49	388.315	377.134	345.892	530.561	276.181
KAI36_01532	517.51	628.685	763.866	567.108	908.439	356.819
KAI36_01533	259	261	362	63	167	81
KAI36_01534	57	73	73	49	101	175
KAI36_01535	186	190	207	52	87	75
KAI36_01536	31	25	42	44	48	20
KAI36_01537	1	4	1	6	2	1
KAI36_01538	2	2	5	3	5	1
KAI36_01539	100	136	137.261	62	74	54
KAI36_01540	82	65	92.549	52	88	67
KAI36_01541	107.852	126.311	129.19	94.021	133.509	108.826
KAI36_01542	52.148	73.689	58	53.979	84.491	49.174
KAI36_01543	449.302	564.003	647.453	204.794	282.714	117
KAI36_01544	442.085	511.532	655.274	298.441	421.7	182.345
KAI36_01545	325.613	447.465	429.273	211.765	303.587	144.655
KAI36_01546	74	79	99	84	125	59
KAI36_01547	43.541	44	57	29.529	64.463	61
KAI36_01548	71.459	81	96	59.471	149.96	57
KAI36_01549	144	159.836	160	78	146.476	74
KAI36_01550	35	42.164	42	8	16.101	10
KAI36_01551	7	11.001	7	13	21	48
KAI36_01552	5	2	1	6	9	28
KAI36_01553	124.782	136.72	173.481	85.488	104.491	55.527
KAI36_01554	95.218	124.28	125.519	99.512	124.509	57.473
KAI36_01555	580.085	858.435	786.695	6105.36	7250.19	4781.58
KAI36_01556	246.923	394.95	447.628	3594.41	3899.33	2394.41
KAI36_01557	206.966	237.615	268.676	1942.23	2011.73	1240.01
KAI36_01558	79	110	84	709	1058	429
KAI36_01559	66	90	90	8035	4582	2118.67
KAI36_01560	108.446	128.38	144.994	709	743.299	457.343
KAI36_01561	49.568	62.148	69.768	298.725	297.428	136.989
KAI36_01562	132.336	171.979	192.787	738.892	768.382	462.343
KAI36_01563	99.651	121.494	138.452	548.383	541.282	301.657
KAI36_01564	158.66	204.93	242.657	15.877	37.746	20.937
KAI36_01565	239.34	275.07	346.343	22.123	24.254	10.063
KAI36_01566	7	3	2	1	0	2
KAI36_01567	0	0	1	2	2	0
KAI36_01568	0	1	2	0	1	0
KAI36_01569	37	45	48	65	71	49
KAI36_01570	67	90	65	363	685	655
KAI36_01571	54	68	62	26	34	34
KAI36_01572	369	415	494	684	936.339	407
KAI36_01573	22	23	25	26	33	7
KAI36_01574	2	1	3	0	1	2
KAI36_01575	216.009	222.186	242	169	239	147
KAI36_01576	2	1	1	5	3.572	8.004
KAI36_01577	2	0	5	2	11.755	6.996
KAI36_01578	5	8	3	4	14.673	7.001
KAI36_01579	6	7	8	15	18	16.999
KAI36_01580	1	2	5	2	0	2
KAI36_01581	1	2	0	3	0	2
KAI36_01582	1	2	3	2	1	3
KAI36_01583	0	0	2	0	0	0
KAI36_01584	157	177	205	46	52	27
KAI36_01585	91.128	105.602	115.666	66	97.395	48
KAI36_01586	93.872	82.398	108.334	83	89.605	38
KAI36_01587	86	81	100	45	47	38
KAI36_01588	10.651	14	19	12	18.062	14.922
KAI36_01589	5.349	1	2	3	2.938	1.078
KAI36_01590	104.95	137	150	132	148.001	117
KAI36_01591	366.782	467.654	467.643	518.513	754.034	508.637
KAI36_01592	237.427	280.003	288.357	628.476	783.97	646.365
KAI36_01593	15	18	15	44.754	60	91.342
KAI36_01594	5	3.204	7	14.791	25	17.924
KAI36_01595	10	25.796	17	43.455	63	93.735
KAI36_01596	27	26	44	36	87	119
KAI36_01597	0	0	0	4	3	1
KAI36_01598	56	67	80	84	168	133
KAI36_01599	90	129	115	68	94	48
KAI36_01600	59	108	86	74	91	48
KAI36_01601	399	584	637	601	973	524
KAI36_01602	33	36	56	22	46	21
KAI36_01603	231	316.716	327	325.002	365.279	212.471
KAI36_01604	734	897.284	854	829.998	1100.72	579.529
KAI36_01605	22	23	20	26	37	19
KAI36_01606	262.126	311.077	397.35	299.806	441.966	282.534
KAI36_01607	72.874	115.923	99.65	68.194	94.034	66.466
KAI36_01608	83	144	135	62	72	46
KAI36_01609	527	674	666.59	884	1440	877.004
KAI36_01610	68	123	156.157	188.488	273	126
KAI36_01611	128	184	264.843	209.512	318	189
KAI36_01612	230.685	244	244.509	785	729.161	330.4
KAI36_01613	234.315	242	296.491	400	350.839	232.6
KAI36_01614	27	32	28	49	42	42
KAI36_01615	3	2	3	10	5	1
KAI36_01616	203.055	296.586	273.277	149	164	77
KAI36_01617	182.403	247.414	253	124.998	201	98
KAI36_01618	57.36	70	64	43.002	43	21
KAI36_01619	136.217	161	132.004	364	358	188
KAI36_01620	7	5	3	17	13	13
KAI36_01621	121	183	154	228	235	150
KAI36_01622	41	51	41	280	448	393
KAI36_01623	1.777	0	0	0	1	0
KAI36_01624	5.225	12	9	10	13	12
KAI36_01625	85	119.014	94	12	26	27
KAI36_01626	6	6.986	7	10	5	8
KAI36_01627	224.459	274.534	340.624	45	48.054	46.194
KAI36_01628	23.412	33.849	33.813	22	25.95	16
KAI36_01629	1	1	4	0	0	0
KAI36_01630	45.686	42.788	91.174	50.466	102.074	42.428
KAI36_01631	12.314	28.212	34.826	30.544	44.926	16.572
KAI36_01632	13	19	15	21.991	30	13
KAI36_01633	57.786	61.701	53.808	116	151.544	93.999
KAI36_01634	12.201	16.824	16.192	18	17.56	22.001
KAI36_01635	5.013	2.475	3	24	11	4
KAI36_01636	6730.14	9200.59	9738.85	27649.6	32732.8	19585
KAI36_01637	742.484	975.377	955.331	1568.06	1668.7	794.072
KAI36_01638	145.448	156.539	205.419	301.877	372.161	200.195
KAI36_01639	269.405	343.556	340.139	759.065	871.206	486.203
KAI36_01640	285	338	239	37	25	34
KAI36_01641	59	48	46	111	129	85
KAI36_01642	46.239	67	69	198	205	140
KAI36_01643	1016	1367	1421.62	4472.67	4593	2388.47
KAI36_01644	1	3	2	2	0	1
KAI36_01645	7	12	5	22	20	23
KAI36_01646	213.129	294.617	332.563	53	45.996	51.828
KAI36_01647	45	44	51	75	65	64.978
KAI36_01648	29	30	26	18	18	14
KAI36_01649	413.008	397.439	437.738	380.004	3884.16	16
KAI36_01650	342.992	309.561	348.262	149.996	2285.87	7
KAI36_01651	4966.62	6946.06	8378.11	705	956	535
KAI36_01652	1351.48	1244.16	1297.39	1014.3	1533.82	600.312
KAI36_01653	3597.53	3518.37	4004.34	3329.94	5226.06	2056.24
KAI36_01654	2989.64	2788.1	3015.01	2582.12	3609.72	1660.9
KAI36_01655	852.725	791.625	757.968	651.488	762.588	420.954
KAI36_01656	4293.38	4214.19	4742.23	5149.15	6701.81	4071.59
KAI36_01657	9	21	6	11	28	26
KAI36_01658	334.936	329	384	1304	2075.19	740
KAI36_01659	357.727	350	369.474	402	523.263	201.446
KAI36_01660	167.672	176	207.526	274.153	384.246	138.554
KAI36_01661	1246.49	1304.27	1481	906.847	1444.49	737
KAI36_01662	841.917	863.73	889	903	1275	641
KAI36_01663	1	0	1	1	3	9
KAI36_01664	1	1	1	2	5	36.493
KAI36_01665	3	4	2	2	3	14.507
KAI36_01666	0	0	0	0	0	0
KAI36_01667	6	3	11	7	9	23
KAI36_01668	42	46.154	52	39	72.647	77.002
KAI36_01669	7	16.846	22	8	22.353	25.998
KAI36_01670	357	430	395	708	794	483
KAI36_01671	121.58	132.261	127.221	51	91.446	42
KAI36_01672	45.936	67.358	76.912	21	36.768	25.727
KAI36_01673	187.354	178.393	193.591	63	103.778	47.904
KAI36_01674	45.13	45.987	51.276	34	49.008	33.369
KAI36_01675	5	5	10	3	5	6
KAI36_01676	19	16	16	11	12	14
KAI36_01677	423.374	471.317	530.281	327.287	413.988	276.747
KAI36_01678	212.72	266.683	281.719	109.713	175.012	92.253
KAI36_01679	286.906	300	303	507	679	577
KAI36_01680	2	2	2	0	0	1
KAI36_01681	2	0	2	2	0	0
KAI36_01682	1838	2438.17	2958.68	1213	1965.25	818
KAI36_01683	233	279.826	279.739	147	209.749	112
KAI36_01684	266.047	295.931	332.925	118.956	159	65.857
KAI36_01685	2345.99	2647.39	3059.77	1709.4	2616.42	1249.9
KAI36_01686	2342.7	2905.53	2778.88	2526.73	3525.41	1772.24
KAI36_01687	5947.28	7316.02	8815.23	24199.3	35735.9	20640.3
KAI36_01688	47	43	68	74	108	87
KAI36_01689	4	12	8	318	359.942	440
KAI36_01690	12	11	12	31	26.058	21.34
KAI36_01691	16	18	21.382	40	46.153	44.66
KAI36_01692	22	17	21.618	49	69.847	73
KAI36_01693	451	477.09	585.543	1136	1400	716
KAI36_01694	555.323	697.322	763.938	208.078	257.626	174.305
KAI36_01695	328.673	423.678	452.062	167.922	213.374	137.695
KAI36_01696	11.004	11	7	8	16	6
KAI36_01697	1734.36	2204.67	2503.44	1754.68	3169.06	1961.99
KAI36_01698	6289.24	7917.58	8417.1	7270.16	10562.2	4672.79
KAI36_01699	5382.43	6724.98	7533.46	5453.74	8460.55	3447.03
KAI36_01700	183	263	275	387	531	427
KAI36_01701	3852	3957	3608.01	89	73	111
KAI36_01702	387.306	432	365	258	349.111	167.083
KAI36_01703	224.694	305	313	369	524.889	333.917
KAI36_01704	1	1	1	11.604	2.893	0
KAI36_01705	30	33	44	82.396	40.107	27
KAI36_01706	13	21	20	73.653	47.801	36
KAI36_01707	11	23	20	55.347	60.199	34
KAI36_01708	1396.71	1623.34	1734.77	1372.34	1864.46	797.001
KAI36_01709	752.524	851.554	1019.78	785.27	1099.95	460.59
KAI36_01710	267.543	320.974	403.357	317.051	455.292	152.92
KAI36_01711	362.496	392.092	448.17	359.072	513.102	197.279
KAI36_01712	294.761	261.043	324.157	272.266	387.308	175.21
KAI36_01713	79	114	122	173	234	703
KAI36_01714	599	752	808	694.979	1081	676.072
KAI36_01715	3	0	1	0	0	0
KAI36_01716	0	0	0	0	0	0
KAI36_01717	23.935	17.01	15	127	118.9	38
KAI36_01718	54.065	79.99	81	400	320.47	136
KAI36_01719	31	42	61.011	94	131.63	72
KAI36_01720	37	62	61	92	127	67
KAI36_01721	4	8	13	12	10	11.702
KAI36_01722	11	6	12	9	6	8.298
KAI36_01723	11	4	10	4	6	7
KAI36_01724	0	0	1	1	1	0
KAI36_01725	7.996	5.14	10.235	7	6	3
KAI36_01726	4.004	5.86	7.765	4	4	3
KAI36_01727	10	8	9	14	12	6
KAI36_01728	221	271	302	137	197	87
KAI36_01729	142	170	162	215	225	184
KAI36_01730	103	83	124	35	41.241	30
KAI36_01731	513	578	610.053	255	220.759	111
KAI36_01732	34	37	40	49	69	35
KAI36_01733	24	22	31	18	41	15
KAI36_01734	204	280	298	143	164	155
KAI36_01735	46	30	46	35	38	6
KAI36_01736	69	84	80	186	186	157
KAI36_01737	1710.28	2062.73	2236.96	988.474	1822.85	866.665
KAI36_01738	2589.27	3214.28	3414.31	1984.94	3367.01	2080.68
KAI36_01739	3052.45	3938.74	4521.41	2999.59	5166.93	3942.65
KAI36_01740	27	29	62	57	107	52
KAI36_01741	13.004	9.543	8.327	15	18.604	12.116
KAI36_01742	8.996	6.457	13.673	17	25.396	7.884
KAI36_01743	17.015	21	14	6	15	10
KAI36_01744	3	7	4	7	6	4
KAI36_01745	39	43	44	26	53	39
KAI36_01746	149	184	176	80.017	102	45.97
KAI36_01747	920	861.38	954	13385	14638.6	939.03
KAI36_01748	3	1	4	9	8	1
KAI36_01749	211	237	209	2300.08	1896	973.28
KAI36_01750	28	23	9	1658	761	1009
KAI36_01751	18	19	26	347.995	207	110
KAI36_01752	62	71	68	261	168	112
KAI36_01753	13	22	14	24	30	16
KAI36_01754	0	0	2	0	0	0
KAI36_01755	0	0	0	0	0	0
KAI36_01756	259	383	318	86	84	52
KAI36_01757	14	11	7	131	194	157
KAI36_01758	31	48	38.71	11	16	9
KAI36_01759	402	504	442.442	204	276.02	122
KAI36_01760	223	286.621	313	272	243.035	111
KAI36_01761	3158.34	3897	4241.01	13200.4	18742.6	14283.6
KAI36_01762	27	21	30	34	41	18
KAI36_01763	1642.94	1552.11	1883.73	3913.41	6822.9	4034.37
KAI36_01764	1363.06	1337.89	1745.33	4540.01	8312.48	5552.63
KAI36_01765	2615.74	3384.89	3680	9345.31	8636.78	5498.63
KAI36_01766	157	254.796	205.994	72	144.822	67
KAI36_01767	75	85.204	70.321	36	43.178	27
KAI36_01768	82	104	129.696	62	111	47
KAI36_01769	0	2	1	1	0	0
KAI36_01770	28	30	29	68	69	86
KAI36_01771	35	62	58	28	55.001	29
KAI36_01772	1680.99	2163	2308.26	3366	5530.81	3468
KAI36_01773	0	0	0	1	0	0
KAI36_01774	107.502	114.001	105	137.002	187.386	94
KAI36_01775	200.498	237.999	228	171.998	264.614	119
KAI36_01776	1	0	0	10	18.951	8
KAI36_01777	15	25	40	70	107.049	55
KAI36_01778	2416.98	3348.99	3734	1190.69	1517	1071
KAI36_01779	40	37	45	50	71	39
KAI36_01780	3	2	5	7	6	2
KAI36_01781	7	7	5	11	12	6
KAI36_01782	7	23	18	30	20	12
KAI36_01783	13	14	12	28	46.55	22
KAI36_01784	50	67	61	130	189.45	126
KAI36_01785	15	21	18	4	9.993	8
KAI36_01786	29	36	37	27	29.007	17
KAI36_01787	159	181	158.389	279	180	280
KAI36_01788	121	149	145	134	142	139
KAI36_01789	92	101	89	174	284	342
KAI36_01790	80	115	66	62	29	29
KAI36_01791	1510	1559	1674	1699	2475	2181.09
KAI36_01792	0	0	0	21	24	17
KAI36_01793	236.901	244.953	255.352	321.675	459.894	196.43
KAI36_01794	366.9	413.284	353.174	466.405	644.883	302.745
KAI36_01795	711.211	874.032	847.433	842.109	1264.88	586.827
KAI36_01796	236.977	275.731	274.041	300.38	484.303	199.998
KAI36_01797	193	244	230	224.342	431.045	229
KAI36_01798	13	23	21	19	19	8
KAI36_01799	108	113	117	35	51	47
KAI36_01800	382.124	481.603	482.374	597.517	1021.37	597.695
KAI36_01801	307.34	338.284	438.617	465.506	1104.25	628.248
KAI36_01802	513.536	557.112	810.008	1074.98	2020.38	1349.06
KAI36_01803	876	1095	1101	1766	2286	1239
KAI36_01804	1072	1160	1314	782	1746	855
KAI36_01805	149	165	219	429	596	300
KAI36_01806	249	320	387	320	590	328
KAI36_01807	598.894	828.554	784.861	355.166	400.536	212.215
KAI36_01808	751.223	815.243	873.315	431.957	512.273	265.258
KAI36_01809	1583.89	1771.06	1889.82	836.877	1139.21	698.527
KAI36_01810	595.36	695.052	702.997	421	611.594	260
KAI36_01811	222.706	312.674	318.248	225.17	319.225	161.241
KAI36_01812	675.934	859.325	953.755	769.491	1033.18	650.759
KAI36_01813	383	486.64	515.561	196.332	315.6	167
KAI36_01814	134.526	132.36	144.439	80.668	103.4	72
KAI36_01815	1166.47	1422	1569	958	1608	798
KAI36_01816	47	41	41	80	76	49
KAI36_01817	36.669	42	63.202	43	76.232	40.048
KAI36_01818	406.298	531.962	582.381	916.595	1520.67	955.28
KAI36_01819	77.033	58.038	108.412	153.405	258.935	145.672
KAI36_01820	5147.99	6583.44	7113.14	5153.8	8145.29	4266.36
KAI36_01821	448.429	621.828	745.116	253.763	414.608	201.852
KAI36_01822	486.576	639.564	765.651	298.268	410.274	220.846
KAI36_01823	810.027	878	870	5658.96	5527.35	5054.13
KAI36_01824	99	112	146	84	75	35
KAI36_01825	2449.07	2920.49	3309.07	2950.01	3990.87	2084.35
KAI36_01826	2363.56	3001.51	2976.13	4522.55	6129.71	4023.65
KAI36_01827	36.386	36	33	56	49.407	52
KAI36_01828	160	158	161	75	107	79
KAI36_01829	573	622	662	823	1155.97	861
KAI36_01830	169	175	180	182	165.783	153
KAI36_01831	62	61	84	62	116	73
KAI36_01832	6636.82	7661.3	8892.83	7976	15059.8	10731
KAI36_01833	138	179	193.009	196	269	159
KAI36_01834	103	121	130	184	200	121
KAI36_01835	1939	2670.66	3399.8	3702	5357.11	3405
KAI36_01836	533.241	688.377	808.012	468.752	477.499	232.632
KAI36_01837	775.149	1004.62	1123.99	554.248	821.549	401.368
KAI36_01838	917.448	1185.78	1337.14	1331.06	1606.22	1253.21
KAI36_01839	422.191	502.222	596.862	348.936	354.599	303.089
KAI36_01840	17.994	10.359	14.994	1958.27	1351.66	3417.2
KAI36_01841	21.006	26.641	40.006	407.085	532.182	1402.51
KAI36_01842	16	20	16	161.001	254.159	819.284
KAI36_01843	10	12	16	8	5	7
KAI36_01844	1142	1298	1340	3475	5733.89	2061
KAI36_01845	349	376	417.134	313	424	271
KAI36_01846	367	487	399	1451	1232	1241
KAI36_01847	0	0	0	0	0	0
KAI36_01848	98	132	127	184	345	201
KAI36_01849	152	168	148	143	152	123
KAI36_01850	1055.54	1352.45	1377.39	1572.57	1841.89	891.457
KAI36_01851	687.338	807.091	759.261	971.864	1206.02	551.015
KAI36_01852	427.13	567.478	743.322	836.562	1173.09	483.527
KAI36_01853	567	815	905	878	1501	1011
KAI36_01854	505.43	564	616.002	133	280.147	168
KAI36_01855	189.57	214	203.998	96	123.853	98
KAI36_01856	227	271	313	207	394	231
KAI36_01857	559	718	762	208	372.992	172
KAI36_01858	4	7	8	1	3.008	5
KAI36_01859	224	295	281.194	104	110	79
KAI36_01860	550.22	725.788	842.049	810.817	1196.93	785.122
KAI36_01861	1927.78	2449.86	2265.97	3286.96	2892.18	2556.88
KAI36_01862	60	98	72	31	54.324	35
KAI36_01863	213	268	307	170	239.266	243
KAI36_01864	1691.26	1892	1791	1648.02	2056	1654.7
KAI36_01865	1	0	0	0	0	0
KAI36_01866	2	9	9	7	11	9
KAI36_01867	60.145	67	68	52	87.18	51
KAI36_01868	144.746	136	140	185	321.82	187
KAI36_01869	62.109	67	78	31	55	25
KAI36_01870	0	5	6	3	13	20
KAI36_01871	1	2	3	2	1	1
KAI36_01872	16.526	11	6	6	19.762	10.225
KAI36_01873	12.474	8	18	12	11.238	21.548
KAI36_01874	16	9	13	13	18	20.226
KAI36_01875	34	43	33	35	55	28
KAI36_01876	496	589	669	746	911.004	661
KAI36_01877	27	49.607	25.587	36	30.675	23
KAI36_01878	75	88.393	98.413	113	127.325	75
KAI36_01879	28	22	33	36	45	25
KAI36_01880	14	14	11	15	12	9
KAI36_01881	17.722	15.342	31	14	13	8
KAI36_01882	4.278	16.658	19.217	5	15	9
KAI36_01883	117.542	104.447	123.823	181.513	201.426	78
KAI36_01884	101.582	139.553	140.96	214.487	256.574	98
KAI36_01885	122	135	142	507	624	510
KAI36_01886	26	41.58	57	149	149.745	97
KAI36_01887	18	29.42	22	39	69.255	30
KAI36_01888	20	22	21	34	47	33
KAI36_01889	61	75	84	186	286	233
KAI36_01890	19.362	32	35.08	17	32	20.001
KAI36_01891	27.638	25	32.92	17	33.461	21.999
KAI36_01892	55	72	66	40	53.076	34
KAI36_01893	27	49	41	35	47.463	31
KAI36_01894	43	46	71.001	33	33	23
KAI36_01895	15	32	48	21	27	14
KAI36_01896	1209.12	1480	1383	941.147	1071	723
KAI36_01897	10	17	16.052	23	27	10.289
KAI36_01898	47	54	42.831	53.036	62.027	53.711
KAI36_01899	416	601.196	784.117	363.964	529.026	431
KAI36_01900	119	128	105	109	141	70
KAI36_01901	7	14	20	11	15	12
KAI36_01902	719	946	1022	646	1616.96	747
KAI36_01903	5402.21	6856.47	7832.16	2482.52	7927.52	2817.01
KAI36_01904	273.794	351.773	318.487	75.996	226.302	57
KAI36_01905	43	48.48	49	36	26	19
KAI36_01906	93	140.812	138.999	126.918	123	72.764
KAI36_01907	130	179.708	205.006	195.082	265	95.236
KAI36_01908	10	19	14	6	14	16
KAI36_01909	437.973	457	541	231	315	145
KAI36_01910	36.027	55	57	41	58	50
KAI36_01911	57	63	59	113	89	144
KAI36_01912	14	21	23.017	7	6	2
KAI36_01913	14	23	24.983	10	8	8
KAI36_01914	4	6	10	7	14.033	11.999
KAI36_01915	2	5	5	2	2.967	2.001
KAI36_01916	1	7	4.001	9	6	5.007
KAI36_01917	10	11	19.999	9	17	6.993
KAI36_01918	93	96	154	87	144.002	76
KAI36_01919	165.154	203.242	241.308	55.257	63.176	41.042
KAI36_01920	78.71	77.886	119.31	21.743	36.723	21.961
KAI36_01921	125.136	169.872	198.379	62	89.101	48.998
KAI36_01922	25	19	21	17	26	19
KAI36_01923	90	146	150	96	176	94
KAI36_01924	323	392	406	214	416	280
KAI36_01925	667.277	654.297	831	179	246	140
KAI36_01926	1177.72	1508.7	1894.76	489	958	578
KAI36_01927	1	3	1	0	0	0
KAI36_01928	86	96	109	133	183.086	120
KAI36_01929	30	39	44	36	59	50
KAI36_01930	89	94	99	89	166	108
KAI36_01931	5	8	10	6	13	6
KAI36_01932	33	45	58	110	129	55
KAI36_01933	69	79	98	48	62	28
KAI36_01934	26	44	48	41	61	38
KAI36_01935	101	86	115	136	188	110
KAI36_01936	31	23	34.511	88.601	116	145
KAI36_01937	22	28	23.489	46.399	97	96
KAI36_01938	85	99	104.294	119	170.997	155.584
KAI36_01939	33	39	39.706	34	36.003	29.416
KAI36_01940	11897	18225.6	20724.1	9217.83	12880.5	7782.03
KAI36_01941	327.46	472.395	449.647	58.343	77.877	57
KAI36_01942	161.54	207.605	243.353	41.657	52.123	47
KAI36_01943	286	283	282	383	494	318
KAI36_01944	363	361	406	768	1180	800
KAI36_01945	246	289	327	962	1573	1271
KAI36_01946	75	91.384	62.337	73.997	73.573	54
KAI36_01947	277.963	301.502	335.026	397.117	533.932	254.105
KAI36_01948	90.037	116.114	107.637	133.887	144.494	66.895
KAI36_01949	268	315	309.126	477	545.422	403
KAI36_01950	296.132	359.616	358	153	132	75
KAI36_01951	654.937	700.972	695.365	282.544	378.171	203.521
KAI36_01952	359.32	317.227	391.099	129.503	211.451	101.887
KAI36_01953	159.179	160.19	191.534	62.954	120.378	63.592
KAI36_01954	90.432	84.995	94.123	20.532	48.458	21
KAI36_01955	155	180	169.879	82.468	196.542	129
KAI36_01956	178.387	203.279	254.178	169.753	199.913	108.001
KAI36_01957	298.007	387.721	383.822	194.247	193.985	156.999
KAI36_01958	158	174	189	58	83.147	60
KAI36_01959	487.002	555	645	640	1007	644
KAI36_01960	5	11	9	4	9	6
KAI36_01961	17	25	13	10	11	3
KAI36_01962	21	21	20	23	25	22
KAI36_01963	3	11	12	51	64	76
KAI36_01964	129	168	181	157	201	180
KAI36_01965	64	78	79	150	220	169
KAI36_01966	0	0	0	0	0	0
KAI36_01967	157.898	170.001	159.684	74	88.563	89
KAI36_01968	42.102	55.999	57.316	114	140.437	138
KAI36_01969	34	53	59	334	347	236
KAI36_01970	16	25	15	24	20.314	28.603
KAI36_01971	35	37	37	62	49.686	37.397
KAI36_01972	13	19	30	9	21	19
KAI36_01973	29	44	43.999	32	49	31
KAI36_01974	55	76	82.001	80	100	57
KAI36_01975	46	47	46	36	61	33
KAI36_01976	877	982	1133	827	1329.94	947
KAI36_01977	164	206	217	77	86	84
KAI36_01978	89.454	107.328	116.789	129	166.549	105.526
KAI36_01979	55.546	81.672	90.211	89	167.451	122.474
KAI36_01980	7	6	7	28	14	28
KAI36_01981	199.28	233	262.188	149	184	89
KAI36_01982	235.711	252	258.812	191	298	158
KAI36_01983	21.008	26	38	12	30	20
KAI36_01984	206	245	248	103	131	117
KAI36_01985	169	217	280	89	135	109
KAI36_01986	3570	4506	5540	2356	4072	2633
KAI36_01987	235.424	212	230.494	111	246.992	109.352
KAI36_01988	984.378	988.569	1232.97	1035.3	2474.67	924.295
KAI36_01989	1609.75	1608.4	1793.43	2370.49	4771.3	2036.84
KAI36_01990	2016.92	2239.97	2560.24	3520.49	5739.12	2518.78
KAI36_01991	1402.91	1734.11	1882.12	3428.68	5651.98	3089.69
KAI36_01992	955.9	1091.93	1000.53	6278.05	7048	7061.21
KAI36_01993	2351.34	2748.91	3139.07	2875.92	5051.03	2467.29
KAI36_01994	992.458	1036.11	1196.78	1286.12	2096.13	1009.71
KAI36_01995	2278.32	2432	2478.45	1833.38	2976	1557
KAI36_01996	849.56	944	1015.78	609.624	986.001	585.998
KAI36_01997	1470.77	1961.68	2116.23	1105	1144	788.749
KAI36_01998	161.118	196.365	237.154	76.334	78	53.183
[truncated: 3,438 more rows]

## Sheet: S25
Supplementary Table S10b. Transcript quantification (raw reads count) results for samples used in the N-fixation activity assay (strain S25)
gene_ID	S25_ctrl_1	S25_ctrl_2	S25_ctrl_3	S25_treated_1	S25_treated_2	S25_treated_3
KAI37_00001	392	984	668	711	654	1138
KAI37_00002	103	326	205.395	490.179	442.133	744.411
KAI37_00003	16	37	20.605	79.579	55.867	105.589
KAI37_00004	614.925	2091.25	1206.72	671.068	526.571	985.715
KAI37_00005	133.929	518.059	300.638	209.242	153.355	276.122
KAI37_00006	1166.14	3735.69	2388.64	2668.93	2054.07	3851.57
KAI37_00007	22	50	42	2	5	13
KAI37_00008	3305	8997	5718.12	3188.88	2241	4653
KAI37_00009	388	1094	729	528	532	857
KAI37_00010	0	0	0	0	0	0
KAI37_00011	0	0	0	0	0	0
KAI37_00012	0	0	0	0	0	0
KAI37_00013	1474	4412	2688	2427	1164	3238.85
KAI37_00014	14	38	22	49	50	68
KAI37_00015	16	48	25	16	7	13
KAI37_00016	297.994	1000.36	572	402	256	584
KAI37_00017	95	258.641	179	192	135.033	283
KAI37_00018	493	1285.7	860	1736.91	992.74	2302.38
KAI37_00019	331	656.298	443	1032.09	656.227	1406.62
KAI37_00020	1134.97	3416.14	2203.98	1354.92	899.859	2022
KAI37_00021	829.922	1987.06	1314.02	1021.34	742.141	1415.67
KAI37_00022	176.104	521.134	318	376.705	245	515.194
KAI37_00023	45.994	122.686	88.569	70.116	60.002	100.291
KAI37_00024	83.006	258.314	177.431	103.917	120.998	157.709
KAI37_00025	3389.8	10740	6798.67	5370	3306	9567.98
KAI37_00026	12.057	44	38	32.2	33.169	53.27
KAI37_00027	72.943	184	128	96.8	84.831	141.73
KAI37_00028	588	2277	1138	266	195	384
KAI37_00029	49	167	96	84	62	118.54
KAI37_00030	47	186	133	122	127.58	168.336
KAI37_00031	59	215	145	147	104.42	229.124
KAI37_00032	8394	34121	19862.5	9345.98	3652	12987.2
KAI37_00033	354	653.639	468.48	134.025	96	182.751
KAI37_00034	544	1651	1015.05	295.257	225.992	484
KAI37_00035	660	1519	1099	1091.74	830.008	1473
KAI37_00036	115	269	157	172	148	284
KAI37_00037	1710.72	6017.82	3294.17	3015.28	2227.31	4145.94
KAI37_00038	704.467	2397.9	1391.85	1671.62	1247.69	2362.99
KAI37_00039	16	56	31	17	16	34
KAI37_00040	80	269.002	148	195.508	174.259	275
KAI37_00041	36	101.998	53	46.492	34.741	54
KAI37_00042	389.036	794.011	527.512	760.105	615.631	991.981
KAI37_00043	3120.96	8167.98	5454.91	2176.89	1363.37	3041.02
KAI37_00044	609	2161	1393.58	1090.01	433	1328
KAI37_00045	401	1149.91	697	401.225	207	506
KAI37_00046	492	1314	830.231	724.775	450	954
KAI37_00047	747.831	2309.56	1340.03	1855.21	1360.48	2768.76
KAI37_00048	526.169	1517.19	886.929	1313.79	1091.65	1819.24
KAI37_00049	5	15	7	8	7.091	12.001
KAI37_00050	422.437	1138.11	669.281	237.76	136.959	275.782
KAI37_00051	1230.96	2911.12	1943.72	631.24	546.408	906.853
KAI37_00052	3492.6	11548.8	6782.64	6079	4290.49	8417.74
KAI37_00053	22	46.004	31	35	33	44
KAI37_00054	593.239	1893.91	1215.07	51.988	29	58
KAI37_00055	1377.76	4498.09	2633.95	609.015	298	832
KAI37_00056	714.541	2000.69	1162.23	720.562	574.988	1065.88
KAI37_00057	236.459	922.688	534.239	504.255	376.016	680.387
KAI37_00058	3567	10586.5	6586.53	6608.18	4257	9157.73
KAI37_00059	1092.96	3104.91	2050.55	1316.77	919.837	1849.65
KAI37_00060	472.055	1200.06	763.026	855.046	652.747	1229.76
KAI37_00061	153.994	485.026	297.349	609.182	512.49	969.587
KAI37_00062	123.005	495.458	278.348	307.561	143.461	379.182
KAI37_00063	182.995	526.542	351.652	370.439	245.539	539.818
KAI37_00064	1035.9	2813	1821.99	1909	1153	2539
KAI37_00065	480.773	952.309	693.643	476.399	373.711	657.592
KAI37_00066	890.227	2930.5	1670.38	921.601	576.289	1446.35
KAI37_00067	253	739.506	518.614	291.828	278.381	450.115
KAI37_00068	102	311.682	194.359	142.172	129.619	255.949
KAI37_00069	38	77.529	34	57.371	46	64.378
KAI37_00070	130.333	419.588	230.32	298.822	245.185	417.56
KAI37_00071	33.667	109.886	52.68	82.184	98.815	127.103
KAI37_00072	375	1343	779	760.734	472	1010.91
KAI37_00073	525	1946.94	1147	1301.22	982.83	1955.44
KAI37_00074	664	2346.03	1297	2244.97	2009.75	3146.98
KAI37_00075	115	475.978	266	393.265	381.416	612.191
KAI37_00076	21	50	30	6	10	14
KAI37_00077	9	15	11	5	1	3
KAI37_00078	3	8	8	4	5	10
KAI37_00079	4	4	4	7	6	11
KAI37_00080	0	4	2	3	5	10
KAI37_00081	0	2	0	5	4	4
KAI37_00082	1	0	0	2	1	4
KAI37_00083	196	687	424	495	375	676
KAI37_00084	167	492	318	15	3	17
KAI37_00085	0	0	0	1	0	0
KAI37_00086	247.646	43.01	60.435	108.259	146.554	94.928
KAI37_00087	#N/A	#N/A	#N/A	#N/A	#N/A	#N/A
KAI37_00088	1406	5077	2911	5332.61	3846.12	8482.2
KAI37_00089	490	1512	858	1165.98	1037	1762
KAI37_00090	2709.69	8245.14	4851.8	2270.34	1750.92	3287.98
KAI37_00091	719.539	1946.34	1352.84	976.777	965.506	1540.81
KAI37_00092	848.774	2439.53	1685.36	2264.9	1803.57	3293.07
KAI37_00093	9	12	1	2	1	7
KAI37_00094	11.849	17	11	1	5	8.397
KAI37_00095	1.151	4	2	1	2	4.603
KAI37_00096	128	377	231	120	62	149
KAI37_00097	2	2	1	3	1	1
KAI37_00098	1	0	1	0	1	2
KAI37_00099	0	4	2	0	1	1
KAI37_00100	463	1724	947	1607	2182	3138
KAI37_00101	94.342	333.3	227.305	188	115	266
KAI37_00102	169.658	578.7	347.695	172	132	274
KAI37_00103	476.99	1119.98	647.112	385.306	273	565.178
KAI37_00104	334.01	1048.02	674.888	314.694	179	394.822
KAI37_00105	165	558.42	306.234	669.577	838.225	1113.65
KAI37_00106	349	1177.58	679.766	711.23	807.775	1166.35
KAI37_00107	212	465.427	255	47	51	84
KAI37_00108	217	469.573	327	69	41	130
KAI37_00109	153	514	289	62	64	138
KAI37_00110	317	808	468	574	375	726
KAI37_00111	5	9	8	5	2	9
KAI37_00112	3	5	6	7	0	7
KAI37_00113	1177	4323	2353	814	426	1011
KAI37_00114	13	65	51	16	32	70
KAI37_00115	36	128	82	36	20	50
KAI37_00116	167	618	351	368	241	527
KAI37_00117	11	46	20	7	11	20
KAI37_00118	11	62.281	48	30.754	38	63.341
KAI37_00119	7	47.719	17	20.246	15	29.659
KAI37_00120	43	94	59	45	35	76
KAI37_00121	1	1	0	0	0	1
KAI37_00122	22	68	43	54	21	61
KAI37_00123	94	401	220	70	71	130
KAI37_00124	134	401	219	88	73	128
KAI37_00125	1776	4615.69	2952	1138	636	1551
KAI37_00126	3	11	8	11	6	4
KAI37_00127	635.452	1390.68	1087.17	400.561	268.229	538.003
KAI37_00128	823.548	1891.87	1384.83	290.439	168.771	419.997
KAI37_00129	43.942	110	70	19	29.067	33
KAI37_00130	285.696	961.212	522.091	324.343	240.839	422.366
KAI37_00131	1002.36	2860.79	1806.91	1523.66	997.161	2150.03
KAI37_00132	0	2	4	7	3	9
KAI37_00133	2	15	9	4	3	2
KAI37_00134	5	5	7	18	7	19
KAI37_00135	212	631.415	396.692	49	31	51
KAI37_00136	41	158.096	100.094	14	12	20
KAI37_00137	34	91.488	51.214	21	11	31
KAI37_00138	9	17	15	5	3	8
KAI37_00139	1473	3800	2231	2518	2174	3790.21
KAI37_00140	915	3317	1822	3652	2873	5358.02
KAI37_00141	25	60	33	45	28	64
KAI37_00142	9374.93	30842.8	18793.6	17363	13840.9	26331.7
KAI37_00143	312	1175.01	651.018	1123	898	1565.37
KAI37_00144	447.999	1461.78	852.37	848.004	561.05	1125.43
KAI37_00145	233.001	671.427	411.657	886.492	551.95	1178.57
KAI37_00146	363	1259.79	793	729.504	318	894
KAI37_00147	4192.1	13143.5	7806.1	5252.14	3060.15	6901.12
KAI37_00148	1771.74	4139.39	2883.76	1618.92	1196.38	2342.16
KAI37_00149	1231.15	3572.14	2449.05	1893.93	1123.47	2838.78
KAI37_00150	10	28.618	17.654	14	6	13.735
KAI37_00151	4	13.382	7.346	3	3	4.265
KAI37_00152	#N/A	#N/A	#N/A	#N/A	#N/A	#N/A
KAI37_00153	#N/A	#N/A	#N/A	#N/A	#N/A	#N/A
KAI37_00154	1	1	1	0	0	0
KAI37_00155	6	7	2	4	8	2
KAI37_00156	0	0	0	0	0	0
KAI37_00157	4	4	3	9	4	5
KAI37_00158	0	0	0	2	7	6.78
KAI37_00159	3.667	1.667	2.333	0.667	0.333	0.333
KAI37_00160	7	5	1	0	0	1
KAI37_00161	2	11	2	1	7	0
KAI37_00162	0	0	0	3	2	1
KAI37_00163	20	49	17	38	16	21
KAI37_00164	0	0	0	0	0	0
KAI37_00165	131	319	193	101	66	124
KAI37_00166	2435	8662	4935.05	4088	2137	5662
KAI37_00167	346.005	931.617	581.433	771.25	579.002	1017.24
KAI37_00168	187.39	493.136	297.262	631.826	504.351	987.012
KAI37_00169	76.101	221.707	133.442	374.343	266.272	505.143
KAI37_00170	47.504	153.54	93.863	259.581	188.375	347.602
KAI37_00171	108	367	249	123	94	189
KAI37_00172	2496.77	5297.44	3999.57	2396.96	1906.93	3665.03
KAI37_00173	781.234	1628.18	1214.58	1224.71	927.312	1919.57
KAI37_00174	1482.78	3134.54	2584.93	4518.8	3126.61	6548.52
KAI37_00175	693.914	1510.31	1168.77	2487.46	1722.16	3757.27
KAI37_00176	417.357	872.534	733.882	1596.07	1029.99	2333.29
KAI37_00177	555.298	1210.07	1062.45	2681.56	1753.88	3640.27
KAI37_00178	446.997	1031.79	861.393	2270.47	1430.09	3340.48
KAI37_00179	378.581	927.185	734.767	2133.64	1123.79	2928.26
KAI37_00180	681.125	1131.95	1042.76	1690.33	1071.71	2569.24
KAI37_00181	1369.99	3921.95	2509.34	1831.94	1209.42	2570.45
KAI37_00182	712.005	1786.27	1274.66	1037.06	740.583	1517.55
KAI37_00183	291.741	931.786	550.423	846.771	715.014	1278.65
KAI37_00184	103.259	276.158	191.667	476.669	328.104	677.268
KAI37_00185	107.002	357.056	203.29	417.557	398.396	680.114
KAI37_00186	93.998	303	180.621	265.003	250.486	405.965
KAI37_00187	214	700	410	162	103	262
KAI37_00188	167	460	289	296	218	450
KAI37_00189	621	1924	1105	13896	7007	20658.5
KAI37_00190	9765	26837.7	19057.3	3106	1748	4786
KAI37_00191	0	1	1	1	1	0
KAI37_00192	4343.94	14443.4	8865.63	5162.06	4006.89	7861.71
KAI37_00193	5024.54	15676.6	10278.1	13114.8	9035.92	20387.9
KAI37_00194	1400	4483.17	2961.89	5266.09	4589.48	8013.86
KAI37_00195	787.813	2260.42	1582.22	3125.67	3146.56	4691.93
KAI37_00196	1779.31	5512.15	3628.47	7047.92	6218.55	10432
KAI37_00197	2825.8	9287.24	5744.71	12788.9	9407.37	19174.4
KAI37_00198	188	492	302	164	114	233
KAI37_00199	1077	2892	1878	1219	841	1719
KAI37_00200	653	2102	1275	421	259	564
KAI37_00201	58596.2	249419	141363	183304	56525	211791
KAI37_00202	17	29	27	33	40	59
KAI37_00203	227	719.543	420	246.35	188	328
KAI37_00204	13	55.457	44	59.65	39	82
KAI37_00205	7	28	14	22	21	32
KAI37_00206	0	0	0	0	0	0
KAI37_00207	18	36	28	25	25	30
KAI37_00208	49.536	187.445	112.794	58.087	51.472	92.666
KAI37_00209	12.464	81.149	47.9	25.913	16.849	49.115
KAI37_00210	46	167.406	89.307	48	25.678	74.219
KAI37_00211	1	1	1	0	0	0
KAI37_00212	17	41	21	63.018	66	101
KAI37_00213	19	64	33	104.982	91	170
KAI37_00214	0	2	1	1	0	1
KAI37_00215	0	2	0	9	5	5
KAI37_00216	2	6	2	23	11	20
KAI37_00217	49	90	70	20	11	26
KAI37_00218	125	344	211	62	31	94
KAI37_00219	1	5	2	4.675	2	14
KAI37_00220	9	18	29	23.325	15	30.304
KAI37_00221	152.045	577	350	139	63	209
KAI37_00222	1	7	7	5	0	4
KAI37_00223	30	98	59	77	54	121
KAI37_00224	302	874	550	960	495	1267
KAI37_00225	2208	5640	3922	956	551	1301.23
KAI37_00226	106	252.902	179.803	118.798	153.027	185
KAI37_00227	39	83.098	48.197	77.202	62.974	94
KAI37_00228	31	78	38	59.996	89.999	102
KAI37_00229	57	125	89	136.004	118.006	170
KAI37_00230	125	322	191	249	126	318
KAI37_00231	6	16	7	24	20	16
KAI37_00232	5	8	10	2	1	4
KAI37_00233	4	30	12	7	7	8
KAI37_00234	2	7	4	3	2	7
KAI37_00235	135	445	254	867	420	1226
KAI37_00236	36	113	62	36	16	45
KAI37_00237	73	265.79	121.746	57	52.111	106
KAI37_00238	37	137.21	53.254	36	45.889	59
KAI37_00239	8	40	24	44	29	53
KAI37_00240	43	118	52	29	24	49
KAI37_00241	0	3	3	1	1	3
KAI37_00242	0	0	2	2	2	4
KAI37_00243	1	6	5	7	2	10
KAI37_00244	16	35	19	28	28	43
KAI37_00245	16	81	37	21	30	42
KAI37_00246	330	867	610	142	88	197
KAI37_00247	8	41.574	22	13	6	24
KAI37_00248	86	250.426	174	68	50	99
KAI37_00249	13	54	41	39	25	78
KAI37_00250	2	3	3	4	5	7.679
KAI37_00251	2	9	0	7	6	6.321
KAI37_00252	6	8	7	24	7	18
KAI37_00253	10	40.233	27	29	29	39
KAI37_00254	28	88.767	66	41	41	65
KAI37_00255	6	9	2	29	27	49
KAI37_00256	66	156.294	90	111.506	83.998	164.375
KAI37_00257	114	370.706	205	205.494	140.002	307.625
KAI37_00258	22	52	32	36	14	54
KAI37_00259	179	892	462	689	426	964
KAI37_00260	5	12	6	5	3	13
KAI37_00261	36	112	73	48	41	80
KAI37_00262	5	28	25	19	10	22.789
KAI37_00263	246	700.002	464.646	343.781	268	535.653
KAI37_00264	177	582.998	386.354	151.219	153	266.558
KAI37_00265	43	120	84	84	74	131
KAI37_00266	282.664	764.749	471.957	283.769	160.953	420.154
KAI37_00267	219.336	494.251	372.043	210.231	142.047	236.846
KAI37_00268	10	13	17	8	9	11
KAI37_00269	28	81	49	30	37	48
KAI37_00270	529	1653	1112	471	261	623
KAI37_00271	122.989	339.431	218	90.374	53	123.066
KAI37_00272	177.011	463.569	338	193.626	114	305.934
KAI37_00273	107	393	247	106	44	170.793
KAI37_00274	1163.91	3606	2215	585	263	809.017
KAI37_00275	108	329	199	59	43	95
KAI37_00276	32.999	108	63	81.551	58	123.69
KAI37_00277	59.001	211	132	100.449	74	127.31
KAI37_00278	75	235	146	784	485	1200
KAI37_00279	0	0	0	0	0	0
KAI37_00280	93	222	155	584.228	556	820.128
KAI37_00281	64	228	127	99.772	66	147.872
KAI37_00282	1636	4270.95	2843	2873	2074	4152
KAI37_00283	64.668	161.104	113.337	102.705	112.718	177.011
KAI37_00284	89.164	196.942	123.663	143.073	181.282	216.958
KAI37_00285	131.167	392	282	512.018	408.752	623.997
KAI37_00286	154.192	460.469	291.358	591.629	478.087	671.434
KAI37_00287	72.808	141.531	97.642	149.575	138.164	206.601
KAI37_00288	2	0	0	1	1	0
KAI37_00289	5	4	1	7	7	11
KAI37_00290	3	5	3	8	3	11
KAI37_00291	305	646.865	468	233	237	316
KAI37_00292	1	0	0	0	1	1
KAI37_00293	2	3	4	0	3	0
KAI37_00294	3	7	2	2	1	3
KAI37_00295	21	34	27	11	15	20
KAI37_00296	4	12	11	3	5	13
KAI37_00297	33	108	56	17	17	24
KAI37_00298	1597	5181	3049	5636	5009	8955.39
KAI37_00299	14	46	24	14	20	26
KAI37_00300	24	97	37	20	18	49
KAI37_00301	18	76	60	52	30	83
KAI37_00302	224	623	380	205	122	278
KAI37_00303	609	2101.65	1172	2397.58	1961.47	3292.44
KAI37_00304	204	763.278	507.003	1891.42	1485.53	2829.56
KAI37_00305	109	404	229	66	46	90
KAI37_00306	760	2483	1686	2221	1465	3455.02
KAI37_00307	1169	3642	2157	876	270	1076
KAI37_00308	2	6	4	2	2	2
KAI37_00309	0	1	2	1	0	1
KAI37_00310	3	8	4	1	2	1
KAI37_00311	13	35	21	8	3	3
KAI37_00312	1594	6949	3629.97	808.995	690	1802
KAI37_00313	70	189	116	31	39	77
KAI37_00314	856.813	3022.51	1624	1820.28	1086.84	3324.53
KAI37_00315	217.187	488.493	350.003	387.72	294.162	554.465
KAI37_00316	5	17	10	8	9	12
KAI37_00317	111	449	249	278	153	437
KAI37_00318	6	31	18	9	7	7
KAI37_00319	11	38	16	71	26	82
KAI37_00320	33	101.999	76.998	31	36.764	50
KAI37_00321	65	152.001	113.002	63	46.236	79
KAI37_00322	37	98.409	63	70	48	94
KAI37_00323	20	49.591	37	28	23	69
KAI37_00324	0	0	0	0	0	0
KAI37_00325	758.002	2492.09	1427	228	133.436	305.319
KAI37_00326	273.998	717.907	423	129	74.564	174.681
KAI37_00327	559	1305	925	221	116.748	315
KAI37_00328	179	571	346	257	175.252	371
KAI37_00329	72	274	135	48	25	70
KAI37_00330	95	268	191.575	127.393	51.378	171.137
KAI37_00331	29	101	63.774	93.659	47.432	134.754
KAI37_00332	38	115	84.651	134.948	49.19	176.246
KAI37_00333	1	2	0	4	4	7
KAI37_00334	3	18	13	3	2	7
KAI37_00335	0	1	1	2	5	7
KAI37_00336	8	17.998	13	7	6	15
KAI37_00337	4	8.002	11	12	13	14
KAI37_00338	2	2	0	0	1	0
KAI37_00339	11	34	17	7	3	8
KAI37_00340	3	6	2	3	4	2
KAI37_00341	42	160	81	709	334	1103
KAI37_00342	119	360	229	82	44	104
KAI37_00343	47	73	48	50	15	58
KAI37_00344	51	137	87	191	117	221
KAI37_00345	567	2043	1166	1047	394	1292
KAI37_00346	22.412	106.224	59	288.577	96.066	368.413
KAI37_00347	17.127	39.447	16	98.068	41.086	113.174
KAI37_00348	67.87	211.329	134	469.787	173.846	647.775
KAI37_00349	277.59	1053	599	1792.57	645.002	2162.64
KAI37_00350	48	129.232	92.694	80.274	58.729	123.011
KAI37_00351	70	235.768	155.347	201.726	150.271	318.989
KAI37_00352	71	222	122	196	252	320
KAI37_00353	1828	6835	3762	2466	1544	3419.16
KAI37_00354	48.424	143.393	92.307	68.916	91.322	112.3
KAI37_00355	63.576	129.607	99.693	29.084	40.678	60.7
KAI37_00356	4	6	4	1	3	6
KAI37_00357	119	234	172	10	8	11
KAI37_00358	198	593	335	313	228	452
KAI37_00359	353.332	1218.18	658.635	173	205	292.813
KAI37_00360	62.668	163.239	110.403	31.276	32.437	53.187
KAI37_00361	31	112.75	61.961	15.724	33.568	24.001
KAI37_00362	87	224	168	63	87.995	101.442
KAI37_00363	47	121.909	91.684	51.995	61.28	78.171
KAI37_00364	37	92.771	69.92	37.005	47.72	55.385
KAI37_00365	19	65.32	45.396	22	45	39
KAI37_00366	13	57.002	35	30	26	44
KAI37_00367	27	100.998	73	47	48	67
KAI37_00368	0	0	0	0	0	0
KAI37_00369	0	46.085	19.82	0	0	0
KAI37_00370	#N/A	#N/A	#N/A	#N/A	#N/A	#N/A
KAI37_00371	0	0	0	1	0	0
KAI37_00372	0	2	0	2	1	0
KAI37_00373	3	3	1	1	0	1
KAI37_00374	8	2	4	0	0	1.22
KAI37_00375	0	5.889	0	1	0	0
KAI37_00376	1	1	0	0	0	0
KAI37_00377	3.667	1.667	2.333	0.667	0.333	0.333
KAI37_00378	2	1	1	0	0	0
KAI37_00379	#N/A	#N/A	#N/A	#N/A	#N/A	#N/A
KAI37_00380	#N/A	#N/A	#N/A	#N/A	#N/A	#N/A
KAI37_00381	#N/A	#N/A	#N/A	#N/A	#N/A	#N/A
KAI37_00382	#N/A	#N/A	#N/A	#N/A	#N/A	#N/A
KAI37_00383	1	3	0	1	0	1
KAI37_00384	15	11	10	7	4	7
KAI37_00385	0	0	0	0	0	0
KAI37_00386	0	0	1	2	1	0
KAI37_00387	0	0	0	0	0	0
KAI37_00388	0	0	0	0	0	0
KAI37_00389	1	0	2	1	1	0
KAI37_00390	0	0	1	0	0	1
KAI37_00391	2	0	1	1	0	0
KAI37_00392	465.685	1500.11	896.53	913.521	604.904	1211.32
KAI37_00393	527.315	1691.89	987.47	772.479	481.46	1009.98
KAI37_00394	16	77	43	635	261.636	757.701
KAI37_00395	139	372	277	1170.99	728	1610
KAI37_00396	#N/A	#N/A	#N/A	#N/A	#N/A	#N/A
KAI37_00397	#N/A	#N/A	#N/A	#N/A	#N/A	#N/A
KAI37_00398	#N/A	#N/A	#N/A	#N/A	#N/A	#N/A
KAI37_00399	69	116	89	16	18	21
KAI37_00400	3	8	9	3	5	8
KAI37_00401	5	16	10	4	0	6
KAI37_00402	33	128	63	18	6	25
KAI37_00403	14	32	15.235	10	6.166	13
KAI37_00404	5	40	16.765	18	13.834	28
KAI37_00405	39	144	82	37	42	66
KAI37_00406	147	456	270.843	49	17	48.842
KAI37_00407	67.312	174.121	117.157	47	26	50.158
KAI37_00408	2.688	13.88	5	4	2.118	3
KAI37_00409	200	425.999	306	98	67.882	104
KAI37_00410	22	92	49	27	21	48
KAI37_00411	247	733	443	1054	1030	1533
KAI37_00412	165	618.393	328	930.234	591.481	1190.47
KAI37_00413	168.623	633.607	355	672.766	473.519	819.528
KAI37_00414	28	138	76	143	106	183
KAI37_00415	149	518.277	290.505	448.111	379.458	701.249
KAI37_00416	35	166.467	99.495	199.895	195.24	282.206
KAI37_00417	2	32.608	12	57.994	83.302	111.17
KAI37_00418	4	26.649	11	67.059	65.15	92.698
KAI37_00419	39	133	93	351.941	373.85	591.703
KAI37_00420	2	10	11	28	21	41
KAI37_00421	4	14	7.998	29.405	37.004	60.525
KAI37_00422	4	20	9.002	52.595	49.996	93.475
KAI37_00423	36	94	54	176.001	221.998	335
KAI37_00424	33	107	81	154.999	161.002	244
KAI37_00425	1249	4292	2501.64	1368	794	1742
KAI37_00426	4	11	4	1	2	4
KAI37_00427	13	25	15	9	7	13
KAI37_00428	31	80	56	30	18	48
KAI37_00429	481	1459.19	881.083	355.352	210.346	485.177
KAI37_00430	119	321.814	186.008	117.648	63.654	139.823
KAI37_00431	128	356	201	127	66	180
KAI37_00432	52	104	65	18.578	17	35
KAI37_00433	253	814	442	224.422	237	376
KAI37_00434	147	432	262	216	254	317
KAI37_00435	66	204	136	137	123	215
KAI37_00436	26	82	51	107	80	145
KAI37_00437	1	1	1	0	0	3
KAI37_00438	70.137	229	132	162	119	236
KAI37_00439	128	402	248	119.016	72	178
KAI37_00440	2355.07	5234.08	3335.72	458.902	243.926	615.578
KAI37_00441	739.839	1564.81	1079.45	255.053	100.074	255.474
KAI37_00442	5314.1	11702.1	8949.17	1620.03	869	2285.95
KAI37_00443	1724	5562	3479	1257	583	1555.49
KAI37_00444	44.424	187.993	146	192.719	246.491	304.972
KAI37_00445	104.576	359.003	264	283.281	356.506	494.472
KAI37_00446	103	366.364	243.195	241.011	224.34	417.675
KAI37_00447	181	500.64	330.805	522.989	461.663	774.721
KAI37_00448	533	1682	1069	1549	984.399	2319.7
KAI37_00449	1677.86	3666.23	2649	402	191	474
KAI37_00450	2672	8934	5518	2384	1910.12	3586
KAI37_00451	107	398	234	290	362	510
KAI37_00452	3	5	6	11	10	17
KAI37_00453	2.001	7	3	14	16	15.31
KAI37_00454	4.999	19	20	13	7	18.69
KAI37_00455	84	255.991	137	192	125	235
KAI37_00456	81	154	81	11	6	28
KAI37_00457	128	529	297	150	137	231
KAI37_00458	1	15	9	1	2	7
KAI37_00459	91.591	317.998	182.473	57.996	57	75.328
KAI37_00460	56.409	153.002	95.551	30.004	34	55.672
KAI37_00461	7.003	7	14	15	8	7
KAI37_00462	58	205	131	139	96	223
KAI37_00463	356	1015	547	450	321	565
KAI37_00464	50	93	53	74	54	100
KAI37_00465	116	337	214	623	543	974
KAI37_00466	7	6	8	5	3	9
KAI37_00467	7	14	9	3	4	4
KAI37_00468	160	442.468	312	37	19	69
KAI37_00469	36.009	124.826	65.842	75.784	70	102.76
KAI37_00470	29.991	99.174	47.158	79.216	65	130.437
KAI37_00471	98.164	355.853	158.776	273.343	141.031	348.641
KAI37_00472	39.361	126.147	106.224	179.663	92.227	189.163
KAI37_00473	35.475	143	79	145.995	75.741	162
KAI37_00474	106	406	242	492	301	633
KAI37_00475	32	81	51	67	38	87
KAI37_00476	24	91	51	18	24	41
KAI37_00477	0	0	0	0	1	0
KAI37_00478	71	150.406	109	125	107	159.99
KAI37_00479	308	1009.6	622	311	184	375.011
KAI37_00480	24	64	48	31	16	30
KAI37_00481	63	210	104	14	9	31
KAI37_00482	3140	9830	5805.51	2572.68	1490	3385
KAI37_00483	240	881	494	239	152	281
KAI37_00484	28	95	68	48	37	87
KAI37_00485	574	2146	1151.6	1576.06	873	2409.09
KAI37_00486	400	1206	745	655	400	936
KAI37_00487	0	0	0	1	0	0
KAI37_00488	66	165	85	31	12	64
KAI37_00489	47	228	115	215	196	395
KAI37_00490	455	1290	780	99	37	124
KAI37_00491	304	897	582	202	115	259
KAI37_00492	527	2091	1241	388	293	602.195
KAI37_00493	452.524	1188.47	744.189	165.002	87	231.692
KAI37_00494	1293.48	3803.12	2367.79	701.998	397	847.308
KAI37_00495	10	6.025	4.025	2	0	1
KAI37_00496	183	477	281	79	51	89
KAI37_00497	127	385	212	350	334	559
KAI37_00498	90.488	314.584	205.007	310.719	319.996	552.992
KAI37_00499	280.512	920.416	515.993	730.281	780.004	1170.01
KAI37_00500	207	610	349	166	83	214
KAI37_00501	2	0	0	2	0	1
KAI37_00502	25	71	49	56	19	59
KAI37_00503	0	1	2	2	5	4
KAI37_00504	2	12	18	5	4	6
KAI37_00505	1	7	10	5	1	8
KAI37_00506	19	46	27	3	2	15
KAI37_00507	3	21	7	9	10	15
KAI37_00508	0	0	0	0	0	0
KAI37_00509	10	33	23	40	24	42
KAI37_00510	2	3	4	9	5	28
KAI37_00511	31	65	51	96	80	181
KAI37_00512	51	195	94	108.264	89	144
KAI37_00513	1	4	0	0	1	1
KAI37_00514	25	142	101	70	65	125
KAI37_00515	17.409	35.296	23	16.509	9.998	20.486
KAI37_00516	48.591	139.704	76	52.491	42.002	58.514
KAI37_00517	16	71.563	51.803	24	14	42
KAI37_00518	2	7.437	4.197	0	5	5
KAI37_00519	42	165	100	59	40	96
KAI37_00520	37	114	85	55	24	65
KAI37_00521	322	834	609	451.286	407	667
KAI37_00522	78	190	101	312	198	395
KAI37_00523	261	885	474	515	217	749
KAI37_00524	100	193	115	141	82	191
KAI37_00525	172	492	308.586	174	118	248
KAI37_00526	13	61	40	108	129	164
KAI37_00527	47.467	165	86	90.589	88	136
KAI37_00528	24.533	128	78	131.411	115	197
KAI37_00529	7	57.001	28	46	45	62
KAI37_00530	3	18.999	15	16	17	20
KAI37_00531	597	2095	1294	1256	809	1824.99
KAI37_00532	1	11	3	15	8	26
KAI37_00533	30	148	101	12	10	17
KAI37_00534	16	61	38	32	32	51
KAI37_00535	393	1570	903	474	289	624
KAI37_00536	46	159	112	25	19	36
KAI37_00537	40	123.474	93.001	65.176	46	95.26
KAI37_00538	180	579.526	357.999	194.824	125	279.74
KAI37_00539	14	60	27	25	16	44
KAI37_00540	8	23	16	10	9	25
KAI37_00541	0	12	4	6	7	4
KAI37_00542	17	42	22	12	9	13
KAI37_00543	24	101	46	34	23	56
KAI37_00544	493	1565	966	661	444.977	1018.53
KAI37_00545	63	212.998	140	231	140.023	297.944
KAI37_00546	297	994	599	537	368	700.526
KAI37_00547	67.48	250.719	116	68.186	68.178	130.116
KAI37_00548	18.386	81.281	50.002	57.823	54.853	101.68
KAI37_00549	135.134	351	214.998	374.098	291.969	457.202
KAI37_00550	24	84	54	119.894	99	135.002
KAI37_00551	1	0	3	7	2	5
KAI37_00552	15	52	26.657	34	47	64
KAI37_00553	47	170	103.343	75	47	96
KAI37_00554	71	249	130	50	27	51
KAI37_00555	110	343	233	96	71	126
KAI37_00556	3	10	4	12	9	20
KAI37_00557	5	10	5	9	3	9.379
KAI37_00558	13	44	35.032	27	17	26.621
KAI37_00559	544	1904	1184	2384	2182	3566.01
KAI37_00560	638	2081	1229	718	415	975
KAI37_00561	726.714	2001.06	1261.29	287.625	244.969	424.447
KAI37_00562	998.242	2550.45	1720.89	443.999	441.902	716.34
KAI37_00563	1335.04	3255.49	2227.8	852.376	789.13	1266.21
KAI37_00564	37	96	52	47	33	63
KAI37_00565	83	222	130	250	144	327
KAI37_00566	37	100	89	37	32	58
KAI37_00567	8	21	8	15	11	16
KAI37_00568	3	8	10	17	13	27
KAI37_00569	486	1636	917	531	526	760
KAI37_00570	339.524	989	604	589.533	431.563	825.113
KAI37_00571	289.476	705	385	439.467	326.437	570.887
KAI37_00572	326	903	618	301	245	406
KAI37_00573	50.724	99	60.029	61.342	50.615	85
KAI37_00574	192.276	679	383.971	509.658	308.385	723.15
KAI37_00575	189	705	405	303	287	467
KAI37_00576	215.538	612.807	372.508	252.464	109.509	412.458
KAI37_00577	208.462	679.193	402.492	353.536	172.491	473.542
KAI37_00578	0	0	1	0	1	0
KAI37_00579	0	0	0	0	0	1
KAI37_00580	2	10	8	7	11	16
KAI37_00581	38	115	104	63	46	87
KAI37_00582	193	611	392	91	76	128
KAI37_00583	272	966	544	408	183	489
KAI37_00584	48	155	79	22	11	20
KAI37_00585	5	23	22	13	8	22
KAI37_00586	20	39	21	18	16	31
KAI37_00587	14	59	24.983	156.884	57	160
KAI37_00588	5	10	12.017	12.116	9	19
KAI37_00589	8	16	15	10	13	22
KAI37_00590	1	9	12	16	9	13
KAI37_00591	20	48	47	28	39	59
KAI37_00592	27	89.92	64.533	43	58.686	64
KAI37_00593	33	152.08	85.467	113	105.314	167
KAI37_00594	105	332	193	116	71	179
KAI37_00595	8	23	23	14	12	39
KAI37_00596	9	37	15	37	10	38
KAI37_00597	0	0	0	2	1	0
KAI37_00598	0	0	0	0	0	0
KAI37_00599	251	819	452	199	118	277
KAI37_00600	77	268	168	289	226	466
KAI37_00601	3	8	8	7.346	2	4
KAI37_00602	1	4	1	2.654	6	3
KAI37_00603	3	3	1	4	3	5
KAI37_00604	37	151	87	64	20	65
KAI37_00605	72	336	186	80	66	141
KAI37_00606	34	71	45	48	32	62
KAI37_00607	20	85	63	40	28	60
KAI37_00608	7	13	7	11	4.176	16
KAI37_00609	33	52	30	49	29.824	48
KAI37_00610	1	6	2	1	0	7
KAI37_00611	95	345	202	188	114	235
KAI37_00612	5	8	4	6	5	8
KAI37_00613	11	29	17	8	13	21
KAI37_00614	9	28	27	3	7	10
KAI37_00615	21	58	29	12	5	14
KAI37_00616	27	48	25	29	12	37
KAI37_00617	2	7	3	3	0	8
KAI37_00618	1479.01	3908.76	2752.85	1123	1408	1745.61
KAI37_00619	308.988	872.235	612.152	513	575	847.392
KAI37_00620	174	470	278	261	221	386
KAI37_00621	8	15	7	5	2	11
KAI37_00622	7	21	6	5	2	5
KAI37_00623	7	15	15	6	4	11
KAI37_00624	94	233	166	98	69	131
KAI37_00625	5	9	6	37	25	63
KAI37_00626	0	21	8	37	13	39
KAI37_00627	5	32	16	86	44	129
KAI37_00628	10.998	27	12	42.995	33	70
KAI37_00629	2.002	5	3	11.005	8	10
KAI37_00630	28	81	65	929.147	727.497	1401.39
KAI37_00631	0	3	4	93.853	64.503	139.607
KAI37_00632	15	45	25	53	49	83
KAI37_00633	267	956.185	566.993	1889.15	2313.84	3294
KAI37_00634	17	80.815	55.007	131.849	110.579	225
KAI37_00635	1	10	5	7	5	6
KAI37_00636	2	6	5	6	0	7
KAI37_00637	3	15	9	15	5	14
KAI37_00638	31	140	103	30	24	46
KAI37_00639	105	449	264	187	106	260
KAI37_00640	129	489	288	275	200	396
KAI37_00641	1302	3489.66	2122	479	273	752
KAI37_00642	37	100	42	22	11	15
KAI37_00643	53	118	79	206	101	267.015
KAI37_00644	72	179	127	403.536	196	558.261
KAI37_00645	10	20.333	13	43.464	16	58.152
KAI37_00646	12.155	30.666	17	47.339	38	77.48
KAI37_00647	46.845	101.273	59.609	64.594	60.001	137.747
KAI37_00648	157	512.728	302.391	620.067	385.999	936.344
KAI37_00649	0	0	0	0	0	0
KAI37_00650	380	1001	630	81	41	89
KAI37_00651	450	1153.95	766	199	99	261
KAI37_00652	12	40	15	3	2	2
KAI37_00653	188.79	471.998	329.656	94.998	87.603	160
KAI37_00654	214.651	681.081	441.939	408.703	252.842	613.246
KAI37_00655	471.56	1303.92	831.405	1294.3	739.555	1678.75
KAI37_00656	252	823	500	638	443	859.696
KAI37_00657	149	459	294	253	146	363
KAI37_00658	119	455	261	157	103	280
KAI37_00659	16	67	46	25	12	41
KAI37_00660	47	108	70	56	48	76
KAI37_00661	6	26	7	8	11	12
KAI37_00662	0	8	8	6	3	9
KAI37_00663	2	5	5	6	2	8
KAI37_00664	3	7	3	4	2	7
KAI37_00665	0	0	0	0	1	0
KAI37_00666	6	23	15	6	3	5
KAI37_00667	10	24	12	14	11	24
KAI37_00668	19	33	33	8	8	27
KAI37_00669	45	158	84	90	71	127
KAI37_00670	0	1	1	0	1	5
KAI37_00671	260	647	381	153	58	212
KAI37_00672	1	0	0	1	1	0
KAI37_00673	6	10	0	1	2	2
KAI37_00674	34	90	65	54	27	85
KAI37_00675	89.159	207.152	139.14	165.995	109	195.645
KAI37_00676	42.831	127.945	80.31	55.005	18	59.353
KAI37_00677	286.01	781.903	536.551	248	164	383.002
KAI37_00678	5	22.001	10	17	3	21
KAI37_00679	0	6.999	2	7	2	8
KAI37_00680	7	18	8	7	4	14
KAI37_00681	23	99	52	17	15	31
KAI37_00682	30	88	57	105	76	148
KAI37_00683	3	3	5	3	2	0
KAI37_00684	26	69	35	11	15	25
KAI37_00685	12	26	15	31	20	45
KAI37_00686	132	345	213	51	22	56
KAI37_00687	8	17	8	9	4	5
KAI37_00688	26	39	39	21.353	17	33.408
KAI37_00689	471	1022	725	107.647	71	137.592
KAI37_00690	116.989	448.446	249	240.27	175	332.076
KAI37_00691	98.011	401.554	221	161.73	150	292.924
KAI37_00692	750	1934	1277.73	105	38	140
KAI37_00693	91.834	207.138	140.419	37.999	44.392	62.031
KAI37_00694	63.166	164.862	126.581	36.001	31.608	50.969
KAI37_00695	7	8	7	9	11	14.999
KAI37_00696	33	87	57	44	49	50.001
KAI37_00697	66	198	150	213	132	278
KAI37_00698	915	3384.78	1796.49	170	99	262
KAI37_00699	315	1018	560	89	55	167
KAI37_00700	41	115	79	849	721	1339
KAI37_00701	31	65	41	3	1	0
KAI37_00702	1	8	2	1	2	3
KAI37_00703	2	8	2	2	2	0
KAI37_00704	2	11.012	5	20	7	23
KAI37_00705	4	1.988	1	11	4	6
KAI37_00706	55	225	122	42	33	69
KAI37_00707	1	4	7	1	2	8
KAI37_00708	4	2	6	5	1	5
KAI37_00709	6	10	11	8	7	10
KAI37_00710	76	296	190	103	106	215
KAI37_00711	19	83	63	53	51	76
KAI37_00712	2560.78	9317.06	5289.96	2363.01	988.073	3051.14
KAI37_00713	3963.22	8986.56	5908.04	2973.99	2024.93	3761.86
KAI37_00714	885	3025	1845.78	461	372	707
KAI37_00715	24	49	49	77	40	79.569
KAI37_00716	161	378	238	356	161	454.431
KAI37_00717	13	57	19	291	194	503
KAI37_00718	166	591	324	437	208	561
KAI37_00719	132	400	246	114	71	157
KAI37_00720	16923.7	61849	35162.9	8331	4383	11089
KAI37_00721	452	1458	833	1096	859	1540
KAI37_00722	20	89	63	53	51	100.996
KAI37_00723	22	67.862	42	64	49.747	83.003
KAI37_00724	110	348.138	240	387	323.253	525.729
KAI37_00725	284.094	959.696	570.503	649.572	386.063	910.457
KAI37_00726	833.906	2858.21	1597.5	2562.43	1364.94	3292.82
KAI37_00727	84	268	181	105	96	132
KAI37_00728	29	61	34	27	15	25
KAI37_00729	281	627	402	191	123	261
KAI37_00730	115	263	182	87	55	129
KAI37_00731	214	671	387	1195	662	1540
KAI37_00732	72	112	61	7	3	6
KAI37_00733	24	64	27	74	34	100
KAI37_00734	1179	3119	2245	1549	1148	2023.16
KAI37_00735	445.996	1417	810.087	346.655	208.536	441.175
KAI37_00736	482.998	1490.25	931	1532.35	817.677	1927.83
KAI37_00737	49.007	144.752	81	142.015	87.785	182
KAI37_00738	144	510.338	319.001	630.374	419.37	848
KAI37_00739	224.134	711.566	417.959	840.269	541.017	1077.33
KAI37_00740	50.866	170.189	102.041	181.439	148.614	244.675
KAI37_00741	22	63	28	19	8	16
KAI37_00742	18	27	29	11	5	19
KAI37_00743	13	31	11	15	8	37
KAI37_00744	4	5	3	1	0	4
KAI37_00745	2	3	4	4	2	1
KAI37_00746	1	7	2	3	4	10
KAI37_00747	1	4	10	15	6	10
KAI37_00748	3	22	10	8	10	16
KAI37_00749	1	5	3	6	7	4
KAI37_00750	20	37	29	15	9	34
KAI37_00751	1532	4688	2906.99	1750	1108	2446.48
KAI37_00752	1562	4013	2460.01	1074	684	1440.52
KAI37_00753	420.486	1424.58	788.358	381.552	209.193	525.254
KAI37_00754	62.513	185.464	92.642	154.279	107.803	224.834
KAI37_00755	56.253	203.956	110.243	214.169	157.003	318.223
KAI37_00756	40.749	104	69.757	138	104.001	176.69
KAI37_00757	2	4	3	3	3	10
KAI37_00758	0	0	0	2	1	4
KAI37_00759	2	11	5	8	2	12
KAI37_00760	14	22.999	12	11	7	18
KAI37_00761	7	20.001	8	15	6	17
KAI37_00762	2	8	0	1	1	1
KAI37_00763	123	395	230	96	52	135
KAI37_00764	1758	6216.62	3714	3904.85	2814.05	5868
KAI37_00765	30	66	46	45	56	66
KAI37_00766	42	90	63	101	56	143
KAI37_00767	99	463	247	69	44	94
KAI37_00768	5.794	6	4	3	4	1
KAI37_00769	9.206	27	13	6	4	16
KAI37_00770	58.577	157.656	120.247	41.026	23.003	69.672
KAI37_00771	202.234	483.344	331.354	182.545	131.997	226.838
KAI37_00772	36.19	112	83.4	38.429	17	57.49
KAI37_00773	217	698.754	430	4000	2232.62	5721
KAI37_00774	0	0	0	0	0	0
KAI37_00775	#N/A	#N/A	#N/A	#N/A	#N/A	#N/A
KAI37_00776	1	0	0	0	0	0
KAI37_00777	101	274.989	196	2373	1302	3275.22
KAI37_00778	1821	5819.01	3812.31	7205.02	4172	9525.34
KAI37_00779	2	13	6	16.987	6	14
KAI37_00780	86	261	177	1192	1462	2196
KAI37_00781	290.378	882.061	578.84	267	154	362.696
KAI37_00782	475.622	1126.94	800.16	533	259	727.304
KAI37_00783	119.223	367.159	240.183	559.068	416.63	728.818
KAI37_00784	271.753	690.219	462.207	1280.41	1021.33	1643.19
KAI37_00785	312.443	877.622	631.062	1721.61	1397.01	2320.99
KAI37_00786	29.58	79	64.549	154.917	84.026	216.004
KAI37_00787	180.159	487.399	378.233	1073.99	799.585	1412.38
KAI37_00788	40.841	86.367	61.569	234.552	176.567	282.201
KAI37_00789	58.837	203.229	163.766	473.159	416.736	710.329
KAI37_00790	256.163	850.604	523.894	2234.26	1428.55	2786.2
KAI37_00791	210	650.401	404.796	1273.04	882.558	1603.9
KAI37_00792	0	0	1	0	0	0
KAI37_00793	99	286.588	186.428	804.825	450	895.651
KAI37_00794	17.436	76.412	64.572	193.175	104	218.349
KAI37_00795	101.564	304	205	623	402	766
KAI37_00796	79	306.054	167	715	382	751
KAI37_00797	315	963	535	161	72	163
KAI37_00798	10	32	21	18	21	27
KAI37_00799	41	148.126	87	70	29.069	102
KAI37_00800	6	18.874	7	9	6.931	18
KAI37_00801	43	141	80	138	81	167
KAI37_00802	150.999	502	302	83	73.603	120.402
KAI37_00803	68.001	172.435	133	112	75.395	201.598
KAI37_00804	45	125.144	86.008	82	66.55	110
KAI37_00805	90	152.421	100.992	105	95.452	122.087
KAI37_00806	59	138	92	132	79	149.913
KAI37_00807	15	68	38	24	9	24
KAI37_00808	190.948	543.966	387.919	405.194	289.785	545.384
KAI37_00809	278.334	745.324	467.855	356.458	272.347	481.584
KAI37_00810	745.718	2081.71	1366.23	1096.35	874.868	1622.03
KAI37_00811	10	39	33	42	43	62.738
KAI37_00812	52	165	75	127	101	158.262
KAI37_00813	713.585	1698.2	1163.51	562.204	316.045	637.591
KAI37_00814	6130.77	16678.2	10622.5	6285.14	3040.95	8335.06
KAI37_00815	58.218	197	147	213	98.991	292.618
KAI37_00816	64.782	195	130	149	95.009	237.382
KAI37_00817	67.14	186.019	104	63	34	98
KAI37_00818	20.86	40	26	11	14	24
KAI37_00819	5	34	14.307	12.442	4	10
KAI37_00820	5	20	8.693	11.558	4	15
KAI37_00821	7	28	20	33	11	28
KAI37_00822	1003	2994.2	1828	1283	854	2037.81
KAI37_00823	21	52	33	44	38	66
KAI37_00824	87	248	140	55	16	75
KAI37_00825	17	60	32	33	24	66
KAI37_00826	17	40	25	39	34	61
KAI37_00827	33	132	61	72	65	123
KAI37_00828	1	0	2	1	1	7
KAI37_00829	138	337	198	105	58	126
KAI37_00830	2718	11084.8	6509	4637	1709	5777
KAI37_00831	115	361	247	169	94	272
KAI37_00832	161	578	304	6181	7217.58	12764
KAI37_00833	116	350	205	39	49	83
KAI37_00834	286.812	1046.47	636.961	296.582	307.247	492.943
KAI37_00835	186.287	585.45	403.039	458.418	395.753	651.057
KAI37_00836	105	433.003	238.006	449.001	556.162	765.995
KAI37_00837	51	119.997	99.994	288.999	345.838	473.005
KAI37_00838	104	207	146.015	38	27	91
KAI37_00839	6	2	5	0	2	0
KAI37_00840	403.709	1187.38	768.242	229.696	213.816	446.51
KAI37_00841	480.291	1070.9	712.758	355.307	233.184	452.49
KAI37_00842	212	578	356.644	262.997	186	369
KAI37_00843	248	658.674	423	563.997	401.989	699.669
KAI37_00844	6	23.326	19	19.003	15.011	23.331
KAI37_00845	63	252.412	116	101	50	135
KAI37_00846	12	68	37	51	31	64
KAI37_00847	15	22	17	13	12	21
KAI37_00848	1	6	3	4	3	8
KAI37_00849	1	4	3	1	2	5
KAI37_00850	3	4	3	4	9	3
KAI37_00851	47	175	89	72	42	110
KAI37_00852	3	1	0	0	0	1
KAI37_00853	4	23	6	5	8	6
KAI37_00854	12.258	27	11.195	2	2	10
KAI37_00855	342.742	1107	640.805	568	445	816
KAI37_00856	0	1	0	2	0	4
KAI37_00857	0	0	0	2	2	1
KAI37_00858	7	9	7	14.585	8	6
KAI37_00859	4	16	18	15.415	20	18
KAI37_00860	4	8	5	3	1	11
KAI37_00861	7	13	7	2	1	5
KAI37_00862	2	15	7	11	12	21
KAI37_00863	1	5	2	3	4	4
KAI37_00864	226	755	447	680	634	1162
KAI37_00865	6	24	18	4	0	4
KAI37_00866	79	216	149	82.193	57	127
KAI37_00867	53	170	98	497	508	793
KAI37_00868	140	476	256	161	85	179
KAI37_00869	110	223	151	59	33	95
KAI37_00870	23	31	25	33	38	43
KAI37_00871	81	206.849	144.608	155.999	209.308	273.557
KAI37_00872	67	234.151	176.392	202.001	156.692	233.443
KAI37_00873	13	46	19	156	62	240
KAI37_00874	3	5	1	4	1	10
KAI37_00875	1	8	6	5	4	5
KAI37_00876	2	4	3	1	0	3
KAI37_00877	314	823.782	512.207	357.402	259.265	554.974
KAI37_00878	271	795.218	500.793	373.598	191.735	605.026
KAI37_00879	24	82	45	66.32	73.002	147
KAI37_00880	33	123	72	156.68	149.998	231
KAI37_00881	683	1865	1217	877	561	1283.05
KAI37_00882	132	403	291	165	99	219
KAI37_00883	0	4	1	2	6	5
KAI37_00884	43	155	77	183	138	246
KAI37_00885	15	47	20	53	44	88
KAI37_00886	2	7	2	29	17	51
KAI37_00887	40	108	62	26	18	42
KAI37_00888	10	33	18	14	19	29
KAI37_00889	84	171	118	126	95	187
KAI37_00890	1577	4080.18	2590.01	1043	599	1606
KAI37_00891	3	8	6	14	8	12
KAI37_00892	0	0	0	0	0	0
KAI37_00893	12	74	41	49.32	36	81
KAI37_00894	36	112	63	91.68	57	105
KAI37_00895	14	51	38	44	28.022	70
KAI37_00896	56	118	92	127	132.978	163
KAI37_00897	92	297	192	219	176	283
KAI37_00898	113	418	229	239	210	389
KAI37_00899	27.002	63.783	50	32	31	60.762
KAI37_00900	70.998	233.217	141	40	56	76.238
KAI37_00901	44	109	58	121	103	132
KAI37_00902	33	138.9	76.998	67.001	37	89.496
KAI37_00903	90	251.1	161.327	200.385	141	265.149
KAI37_00904	435.797	1096.1	755.675	573.876	377.287	769.26
KAI37_00905	235.203	578.897	348	291.737	193.713	422.245
KAI37_00906	69.999	240.773	190.797	275.977	185.687	487.536
KAI37_00907	116.419	433.726	261.631	613.303	409.365	913.569
KAI37_00908	30.582	148.501	78.572	195.721	114.948	277.895
KAI37_00909	167.525	512.585	299.079	573.972	439.477	779.604
KAI37_00910	49.475	206.484	120.921	236.028	159.523	391.396
KAI37_00911	113	387	200	401	378	697
KAI37_00912	1751.02	5102.15	3126.56	386.902	188.916	550.949
KAI37_00913	2303.98	5808.84	3839.44	2126.1	1049.08	2749.05
KAI37_00914	7	16	17	29	7	24
KAI37_00915	31	112	52	50	36	66
KAI37_00916	9	35	22	10	18	32
KAI37_00917	139	412.11	238	46	21	51
KAI37_00918	8	12	11	27	39	55
KAI37_00919	14	65.131	45	95.373	79	112
KAI37_00920	9	9.869	5	21	19	20
KAI37_00921	234	617.932	373	147	102.749	256
KAI37_00922	13	43.068	31	50	32.251	75.562
KAI37_00923	37	70	52.414	47	23.131	78.206
KAI37_00924	25	65	56.586	51	49.869	77.232
KAI37_00925	21	74	35	48	25	40
KAI37_00926	5	2	5	5	3	2
KAI37_00927	1	25	10	20	20	18
KAI37_00928	4	17	11	18	11	19
KAI37_00929	5	10.999	1	7.565	5	6
KAI37_00930	10	17.437	16	17.437	14	24
KAI37_00931	22	52.564	35	29.998	29	68
KAI37_00932	39	162	120	126	55	195
KAI37_00933	48	95	60	37	22	50
KAI37_00934	19	74	38	34	21	42
KAI37_00935	0	1	0	0	0	0
KAI37_00936	2427.12	10464.6	5717.36	10386.3	5317.09	13062.7
KAI37_00937	548.877	1946.39	1177.65	1819.44	788.319	2631.32
KAI37_00938	173.958	441	305	95	85.307	133
KAI37_00939	300.006	913	549	241	198.693	379
KAI37_00940	1119	2453.09	1716	637	326	931
KAI37_00941	67	140.786	101.997	146.441	94	195.987
KAI37_00942	135.938	416.256	259.845	359.698	222.355	567.98
KAI37_00943	166.6	507.806	309.158	584.365	354.884	831.225
KAI37_00944	212.463	707.173	400	812.495	581.719	1059.81
KAI37_00945	164.999	627.93	365.815	948.15	549.897	1210.04
KAI37_00946	45.001	158.049	96.219	240.85	125.103	335.16
KAI37_00947	19	90	56	179.489	102.003	238.998
KAI37_00948	31	119	62	251.112	152.997	333.004
KAI37_00949	24.598	75.336	50	219.794	119.996	297.669
KAI37_00950	15.402	59.664	30	193.605	107.004	229.94
KAI37_00951	22	82.17	41	199.235	111.983	274.389
KAI37_00952	371.12	991.312	568.373	303.765	168.585	416.122
KAI37_00953	373.242	996	684.627	541	330.433	662.878
KAI37_00954	0	0	0	0	0	0
KAI37_00955	68	231	123	68	25	75
KAI37_00956	4.003	23	14.999	15.014	13.548	20
KAI37_00957	65.997	194	154.001	133.986	200.452	161
KAI37_00958	0	0	0	0	0	0
KAI37_00959	26	73	52.725	29.996	20	41.998
KAI37_00960	36	127	76.275	46.004	25	42.002
KAI37_00961	316.514	903.216	549.018	784.368	749.821	1324.35
KAI37_00962	190.04	455.859	346.528	689.74	652.103	1128.25
KAI37_00963	297.446	569.925	473.454	1054.89	941.076	1777.43
KAI37_00964	114.028	252.987	183.529	157.649	97.483	205
KAI37_00965	102.972	252.013	171.471	74.351	39.517	108
KAI37_00966	21	35	14	20	17	29
KAI37_00967	17	42	29	17	7	19
KAI37_00968	316	947	561	384	261	574
KAI37_00969	6.898	14	7.976	12.998	4.003	23.008
KAI37_00970	3.102	19	20.024	29.002	9.997	29.992
KAI37_00971	7	47	28	65	20	79
KAI37_00972	13	32	23	28.001	17	42
KAI37_00973	6	19	11	21.999	3	23
KAI37_00974	0	0	0	0	0	0
KAI37_00975	13	33	21	27	17	36
KAI37_00976	1	5	2	4	1	4
KAI37_00977	11	38	11	5	7	11
KAI37_00978	153	518	309	91	68	149
KAI37_00979	53	172	106	114	63	167
KAI37_00980	4	30	19	13	9	25
KAI37_00981	5	4	3	8	0	10
KAI37_00982	9	28	21	15	17	28
KAI37_00983	4	17	8	12	14	23
KAI37_00984	7	19	6	11	9	10
KAI37_00985	100	319.029	189	133	78	218
KAI37_00986	30.522	130.564	79	111.267	82.558	210.334
KAI37_00987	19.478	64.108	26	159.306	69.116	202.216
KAI37_00988	36	101.328	73	413.426	238.329	630.807
KAI37_00989	29	75	66	300.091	201.026	527.968
KAI37_00990	70	131	115	526.033	308.971	801.675
KAI37_00991	9	27	16	39	25	70
KAI37_00992	5	14	2	19.997	17	36
KAI37_00993	9	24.998	17	42.003	21.199	44
KAI37_00994	12	26.002	13	32	20.801	58
KAI37_00995	8	29	24	31	26	44.069
KAI37_00996	12	22	19	23	28	36.567
KAI37_00997	1	6	2	1	3	7.364
KAI37_00998	4	15	7	16	8	15
KAI37_00999	10	45	23	15	11	22
KAI37_01000	189.982	553.42	366.105	153.508	121.996	247.008
KAI37_01001	187.018	383.58	264.314	212.492	146.004	307.992
KAI37_01002	1135	3369	2115	175	99	256
KAI37_01003	421.619	1162.81	893.278	70.239	38	101
KAI37_01004	228.381	537.195	420.719	59.761	40	96
KAI37_01005	205	514	393.001	112	56	168
KAI37_01006	9	31	18	24	9	34
KAI37_01007	21	77	53.197	50	32	89.354
KAI37_01008	91.165	275.175	219.803	108.993	83.428	135.932
KAI37_01009	300.835	823.825	533.013	147.007	97.572	283.714
KAI37_01010	181	514	324	387	219	491
KAI37_01011	19	25	15	20	14	28
KAI37_01012	6	24	9	5	5	7
KAI37_01013	388	1413	786	767	463	1031
KAI37_01014	343	893	560.005	813	650	1119
KAI37_01015	48.953	152.94	109	27	38	63
KAI37_01016	33.047	89.06	66	42	50	70
KAI37_01017	67	157	105	145	151	218
KAI37_01018	1	4	6	1	0	1
KAI37_01019	113	438.5	231	144	85.271	180
KAI37_01020	207.174	669.959	442	527.514	286.732	603.08
KAI37_01021	101.256	345.665	186.697	244.22	116.612	312.864
KAI37_01022	42.57	179.877	120.303	94.267	61.385	162.057
KAI37_01023	83	282	187	258	105	293
KAI37_01024	5	28	13	29	12	39
KAI37_01025	574	1777	1037	934	1032	1551
KAI37_01026	25	103	53	116	74	179
KAI37_01027	291	850	496	169	118	225
KAI37_01028	12	65	54	33	24	50
KAI37_01029	147	366	286	40	23	76
KAI37_01030	61	154	101	237	266	369
KAI37_01031	41	119	82	86	55	93
KAI37_01032	71	262	149	74	44	102
KAI37_01033	1033	2632	1742	353	131	426
KAI37_01034	40	176	104	60	42	102
KAI37_01035	109	351	228	41	14	47
KAI37_01036	588	2150	1345	726.05	450	1046
KAI37_01037	1	0	0	1	0	0
KAI37_01038	563	1741	930	296	169	364
KAI37_01039	164	555	323	117	64	175
KAI37_01040	22	52	30	13	9	23
KAI37_01041	4	18	23	3	5	14
KAI37_01042	113	307	194	267	130	383
KAI37_01043	7	26	9	51	102	89
KAI37_01044	233	947	505	837	746	1183
KAI37_01045	970.626	1944.85	1445.56	314.982	141	393
KAI37_01046	200.374	552.152	327.44	13.018	9	23
KAI37_01047	27	89	41	26	21	33
KAI37_01048	31	62	37	55	38	84
KAI37_01049	161	655	411	376	166	647
KAI37_01050	8	15	8	3	7	6
KAI37_01051	20	43	36	11	16	25
KAI37_01052	7	32	20	4	6	19
KAI37_01053	2	10	2	7	5	12
KAI37_01054	32	92.919	62	102	68	172.965
KAI37_01055	1	9.081	8	3	2	7.035
KAI37_01056	0	1	1	2	0	2
KAI37_01057	53.005	155.004	98	111.847	76.895	218.004
KAI37_01058	73.995	135.996	99	209.153	91.105	280.996
KAI37_01059	0	0	0	1	0	1
KAI37_01060	405	1585	818	444	173	616
KAI37_01061	8	17	11	8	4	16
KAI37_01062	12	49.002	29	14	12.472	17
KAI37_01063	21	47.998	53	23	13.528	31
KAI37_01064	140	517	284	523.009	213	624
KAI37_01065	8	10	10	7	5	8
KAI37_01066	1	3	1	2	0	2
KAI37_01067	50	114	92	28	25	38
KAI37_01068	63	158	97	240.987	279.987	467.116
KAI37_01069	20	45.837	21.003	149.256	111.61	278.099
KAI37_01070	121	342.163	231.997	558.757	573.403	979.309
KAI37_01071	2	8.476	11.697	13.999	11.009	16.666
KAI37_01072	35	124.524	74.303	142.001	118.991	242.81
KAI37_01073	85.001	195.35	135.472	167.001	113.261	278.238
KAI37_01074	20.731	50.291	44.991	58.607	47.491	110.851
KAI37_01075	165.267	422.786	285.325	333.144	218.2	507.763
KAI37_01076	247.693	533.015	410.125	290.792	184.706	437.61
KAI37_01077	205.307	526.561	360.073	160.456	109.342	257.537
KAI37_01078	2	1	1	0	1	2
KAI37_01079	2	0	1	2	0	0
KAI37_01080	0	2	3	6	1	3
KAI37_01081	22	54	29	54	28	91
KAI37_01082	32	67	61	31	15	36
KAI37_01083	18	80	41	38	30	44
KAI37_01084	15	71	28	106	77	167
KAI37_01085	92	278	175	167	196	296
KAI37_01086	21	51	30	72	84	118
KAI37_01087	3	11	7	17	20	39
KAI37_01088	4	8	5	12	6	16
KAI37_01089	27	60.411	46.997	43	28	77
KAI37_01090	15	58.589	27.003	35	16	42
KAI37_01091	31	85	68	78	55	116
KAI37_01092	30	98	73	182	142	264
KAI37_01093	92.925	407.684	297.402	670.125	451.683	923.75
KAI37_01094	26.952	143.196	81.762	190.385	111.937	261.545
KAI37_01095	177.122	535.12	357.837	462.49	289.512	661.705
KAI37_01096	84.836	269.678	165.814	163.113	113.439	235.383
KAI37_01097	99.164	235.322	155.186	123.887	91.561	143.617
KAI37_01098	49	108	57	10	3	13
KAI37_01099	11	39	19	20	13.996	35
KAI37_01100	5	12	15	25	21.004	28
KAI37_01101	238	784.999	474	374.635	251	543
KAI37_01102	156	587	327	654	834	905
KAI37_01103	35.347	127.054	65.951	23.701	19	30.291
KAI37_01104	106.653	363.946	208.049	72.299	55	88.709
KAI37_01105	41	120	91	252	151	357
KAI37_01106	1480.88	3769.43	2415.96	54983.8	45690.3	65282.4
KAI37_01107	246.954	419.828	313.726	5250.71	6658.11	6928.53
KAI37_01108	1801.75	4921.94	2978.31	84739.6	69218.6	102771
KAI37_01109	417.418	1060.8	670.367	15450.2	15873.5	20512.4
KAI37_01110	153	380	277	9366.64	8459.28	11788.7
KAI37_01111	572	1447.43	956.498	27084.5	28947.4	36636.5
KAI37_01112	117.998	323.171	214.502	6542.55	7018.61	9209.58
KAI37_01113	291.174	813.636	471.868	16520.1	17644	21704
KAI37_01114	107.158	298.618	188.702	6275.18	6455.18	8143.78
KAI37_01115	95.166	231.285	130.458	4506.19	5232.14	5720.88
KAI37_01116	315.504	729.869	519.613	14366.4	16933.5	19416
KAI37_01117	205.989	386.855	262.766	7287.03	9519.23	9772.5
KAI37_01118	740.283	1687.54	1182.98	25156.7	32506.2	35445.6
KAI37_01119	101.728	200.618	138.609	3690.27	4872.9	5137.47
KAI37_01120	17	50	25	846.747	1009.15	1063.79
KAI37_01121	1	2	3	34	30	42
KAI37_01122	108.128	246.184	145	3924.63	4110.41	5284.37
KAI37_01123	65.872	110.959	84.586	1737.59	2347.02	2289.36
KAI37_01124	146.477	311.856	221.669	4292.73	6364.47	6167.55
KAI37_01125	45.523	91	80.745	1420.58	1860.11	2077.62
KAI37_01126	3	30	22	270.461	251.997	350.577
KAI37_01127	47	135	87	1311	2000.77	1924.64
KAI37_01128	127	310	189	3186.98	4424.23	4361
KAI37_01129	0	0	0	15.016	14	16
KAI37_01130	4	23	8	10	11	19
KAI37_01131	1	7	2	2	4	7
KAI37_01132	4	10.28	8	13	7	11
KAI37_01133	2	8.72	8	10	4	8
KAI37_01134	3	5	5	9	13	7
KAI37_01135	1	4	3	6	4	13
KAI37_01136	24	47	39	75	63	74
KAI37_01137	4	22	22	38	25	44
KAI37_01138	0	4	0	7	0	9.772
KAI37_01139	2	4	4	6	5	10.228
KAI37_01140	7	22	12	21	14	28
KAI37_01141	0	10	7	10	8	15
KAI37_01142	19	68	37	69	62	103
KAI37_01143	7	6	2	17	9	17
KAI37_01144	35	128	69	147	127	220
KAI37_01145	15	43	31	71	54	92
KAI37_01146	7	11	6	21	11	36.002
KAI37_01147	0	6	5	17	8	21.998
KAI37_01148	1	9	9	17	13	24
KAI37_01149	578	1657	972	563	400	868.998
KAI37_01150	58	195.613	111	182.36	113	235.657
KAI37_01151	47.954	133.387	80.054	139.64	105	196.345
KAI37_01152	1356.05	4242.71	2890.95	410	246	516
KAI37_01153	8	12	23	28	20	33
KAI37_01154	436	1365	810	122	107	134
KAI37_01155	4186	10320	7059.49	2918	1221	3669
KAI37_01156	3106	9153	5991.09	5117	6076	7720
KAI37_01157	1687	3879	2715	1264	631	1590
KAI37_01158	234	626	424	260	136	369
KAI37_01159	15	51.004	26	10	5	8
KAI37_01160	2	46	23	5	5	13
KAI37_01161	28	79.996	48	20	16	32
KAI37_01162	1	12	13	8	1	9.337
KAI37_01163	8	55.606	28	10	7	19.663
KAI37_01164	6	45.394	16	7	4	13
KAI37_01165	2	18	12	1	4	6.012
KAI37_01166	7	31.304	18	16.256	10	23.988
KAI37_01167	16	57.698	23	19.744	4	11
KAI37_01168	7	27.998	12	4	3	15
KAI37_01169	14	64	35	19.998	7.388	18
KAI37_01170	15	50	14	18.002	11.612	22
KAI37_01171	4	16	7	12.201	7	6
KAI37_01172	105	259	147	36.799	13	40
KAI37_01173	142	274	223	34	24	47
KAI37_01174	123	299	205.016	387	335.848	562
KAI37_01175	63	178	100.984	148	116.152	221
KAI37_01176	1	2	1	2	1	5
KAI37_01177	80	228	135.009	75	58	96
KAI37_01178	1	3	3	3	1	2
KAI37_01179	1	6	3	3	0	1
KAI37_01180	0	0	0	0	0	0
KAI37_01181	0	0	2	2	1	2
KAI37_01182	0	6	4	1	2	4
KAI37_01183	0	6	2	0	1	3
KAI37_01184	1	7	9	4	3	1
KAI37_01185	2	10	3	9.999	2	4
KAI37_01186	3	8	2	4.001	3	10
KAI37_01187	0	4	0	2	4	4
KAI37_01188	4	18	6	19	6	16
KAI37_01189	2	27	15	12	9	12
KAI37_01190	1	1	1	1	0	7
KAI37_01191	130	421	253.757	85.358	46	93.01
KAI37_01192	23	102	57.243	60.642	35	77.99
KAI37_01193	129	330	261	43	26	69
KAI37_01194	7	2	3	0	1	2
KAI37_01195	1	7	4	1	2	2
KAI37_01196	13	30	22	14	16	34
KAI37_01197	296	789	496	280	173	417
KAI37_01198	1	3	1	1	0	1
KAI37_01199	1	8	4	4	4	3
KAI37_01200	0	7	7	2	2	6
KAI37_01201	0	0	0	0	0	3
KAI37_01202	1	8	5	1	5	5
KAI37_01203	0	0	0	4	0	1
KAI37_01204	1	7	1	1	0	4
KAI37_01205	5	10	8	8	10	12
KAI37_01206	4	7	8	6	4	8
KAI37_01207	4	14	9	3	6	14
KAI37_01208	40	101	55	32	32	54
KAI37_01209	0	1	0	0	0	0
KAI37_01210	2	4	2	0	0	1
KAI37_01211	5	19.692	8	8	13	16
KAI37_01212	0	8.308	6	4	3.997	9
KAI37_01213	1	6	4	6	4.594	15.83
KAI37_01214	5	13	7	13	8.409	15.17
KAI37_01215	169	498	327	278	150	349
KAI37_01216	155.999	428.186	322.999	187.927	160.108	260.598
KAI37_01217	159.621	484.032	291.061	540.999	342.423	654.832
KAI37_01218	140.035	331.424	230.677	298.835	223.537	408.105
KAI37_01219	266.345	716.422	464.263	707.239	440.932	911.464
KAI37_01220	456	1346	917	602	407	841
KAI37_01221	755.667	2111.57	1288.65	666	470.997	963.384
KAI37_01222	298.333	597.427	445.357	337.001	276.018	525.228
KAI37_01223	248.001	691	476	502.596	323.403	709.44
KAI37_01224	64.999	154	94.941	91.403	59.582	144.498
KAI37_01225	64	186	119.059	126	62	191.062
KAI37_01226	861.781	2214.8	1428.09	836.653	901.231	1278.31
KAI37_01227	2698.22	9127.2	5477.91	10393	8546.77	14080.3
KAI37_01228	0	0	0	2	0	3
KAI37_01229	2	5	3	8	3	9
KAI37_01230	87	213	125	131	75	189
KAI37_01231	7	21	2	11	3	14
KAI37_01232	4	14	11	5	2	1
KAI37_01233	4	26.311	10.182	7	4	10
KAI37_01234	33	107.689	90.818	41	35	65
KAI37_01235	1	7	6	1	5	2
KAI37_01236	5	9	3	3	6	5
KAI37_01237	102	399	214	144	92	188
KAI37_01238	36	99	46	40	16	36
KAI37_01239	0	1	4	4	2	2
KAI37_01240	0	0	0	0	0	0
KAI37_01241	137	455	255	168	46	224
KAI37_01242	0	5	2	0	0	0
KAI37_01243	0	0	2	2	0	1
KAI37_01244	0	2	2	1	0	2
KAI37_01245	3	3	8	10	2	8
KAI37_01246	268.511	488.007	388.505	303.033	129.001	363.384
KAI37_01247	2048.04	4809.8	3822.86	3671.27	1744.82	4691.35
KAI37_01248	1432.44	3475.19	2629.63	2865.7	1332.18	3870.02
KAI37_01249	383.314	1350.55	774.223	56.55	40.485	95
KAI37_01250	390.682	1315.45	763.777	19.45	15.515	37
KAI37_01251	88	213	130	63	41	103
KAI37_01252	1300	3654	2272	885	446	1135
KAI37_01253	33	162	85	376	425	527
KAI37_01254	735	2610	1556	2991.93	1569	4252
KAI37_01255	6	14.386	15	35.424	30	68.61
KAI37_01256	26	50.614	41	82.576	77.22	129.39
KAI37_01257	8	30	20	45.002	50.78	66
KAI37_01258	3	26	17	36.998	28	53
KAI37_01259	3	17	9	4	3	13
KAI37_01260	23	29	16	11	26	35
KAI37_01261	123	383	263	269	312	413
KAI37_01262	134	504	258	152	99	181
KAI37_01263	4	21	10	19	14	16
KAI37_01264	6	9.487	8	15	6	14.754
KAI37_01265	23	87.513	51	74	56	72.246
KAI37_01266	2008	5780	3767	1485	992	2008
KAI37_01267	540.217	1697.79	1007.81	674.261	447.092	1015.35
KAI37_01268	458.783	1319.21	837.433	639.739	424.908	927.622
KAI37_01269	1425.81	4214.05	2549.28	2608	1703	3708.03
KAI37_01270	97	338	224	85	48	116
KAI37_01271	#N/A	#N/A	#N/A	#N/A	#N/A	#N/A
KAI37_01272	2	1.111	2	0	1	3
KAI37_01273	78	234	138	85	54	121.999
KAI37_01274	88	344	200	72	55	108.001
KAI37_01275	#N/A	#N/A	#N/A	#N/A	#N/A	#N/A
KAI37_01276	#N/A	#N/A	#N/A	#N/A	#N/A	#N/A
KAI37_01277	0	0	0	1	0	0
KAI37_01278	180	524	338	201	96	317
KAI37_01279	39	86	76	44	28	59
KAI37_01280	40	60	53	48	35	50
KAI37_01281	14	80	46	363	198	586
KAI37_01282	0	5	0	1	0	1
KAI37_01283	180	578	352	116	45	162
KAI37_01284	84	328	198	104	64	140
KAI37_01285	1	6	2	3	0	0
KAI37_01286	378	1233	716	174	125	231
KAI37_01287	550.997	2204.79	1180	162.298	123	294
KAI37_01288	213.035	839.281	418.998	63.702	41	113
KAI37_01289	48.995	110.168	93	81	71	130
KAI37_01290	27.005	75.832	47	34	33	79
KAI37_01291	4	13	13	15	13	15.037
KAI37_01292	1	4	4	4	4	2.963
KAI37_01293	10	26	17	13	14	29
KAI37_01294	15	42	30	12	26	19
KAI37_01295	111	307	175	161	111	246
KAI37_01296	3332	9511.71	6267.92	1415	540.962	1830
KAI37_01297	56	99	99.435	4	0	1
KAI37_01298	3611.46	11471	6895.46	850	285.139	1080
KAI37_01299	1159.64	3804.99	2179.54	746	374.861	1158
KAI37_01300	91.904	238.021	174	48	37	75
KAI37_01301	71	166	97	23	32	41
KAI37_01302	1426.07	3997.52	2566.85	48	21	43
KAI37_01303	314.271	690.076	558.75	8	7	31
KAI37_01304	176.047	374.403	280.126	14	16	28
KAI37_01305	95.67	222	165.27	19	14	40
KAI37_01306	170	538	300	268	154	366
KAI37_01307	9	35	8	21	17	31
KAI37_01308	4	13	6	4	6.576	7
KAI37_01309	1	7	2	4	5.424	7
KAI37_01310	0	2	0	2	2	3
KAI37_01311	5	15.19	7	14	8	9
KAI37_01312	0	1.81	1.99	1	1	0
KAI37_01313	0	1	1.01	0	0	2
KAI37_01314	0	5	2	3	6	7
KAI37_01315	1	6	2	0	0	1
KAI37_01316	2	3	1	1	0	2
KAI37_01317	15	35	15	10	3	18
KAI37_01318	23.376	36.895	31.189	11.011	7.995	14.002
KAI37_01319	0	0	2	0	0	0
KAI37_01320	4	27	27	8	9	6
KAI37_01321	177	628	383	38	17	41
KAI37_01322	483.549	1454.9	976.677	1082.82	842.888	1572.51
KAI37_01323	291.451	955.103	587.36	901.176	661.112	1204.49
KAI37_01324	8249.45	29743	18175.9	7691	6033.29	11047.2
KAI37_01325	231.552	677.547	409	440	317.707	640
KAI37_01326	569	1908	1123	1000	629	1390
KAI37_01327	2457	7306.52	4588.64	6579.01	5039	9343.5
KAI37_01328	411.997	914.799	639.814	665.952	505	896
KAI37_01329	170.003	401.531	290.544	340.038	235	448
KAI37_01330	744	1997.95	1345	261	149	297
KAI37_01331	320	770	583	168	157	228
KAI37_01332	88	240	161	149	110	202
KAI37_01333	274	1013	568	211	123	300
KAI37_01334	14	42	25	13	8	32
KAI37_01335	899	2470	1668	1380	1074.29	2036
KAI37_01336	731	2115.01	1273	971.021	764.713	1513
KAI37_01337	162.005	490.398	290.645	229	158.046	378
KAI37_01338	68.995	182.251	149.355	164.555	121.954	282.003
KAI37_01339	17	74.351	45	79.445	56	118.997
KAI37_01340	4	1	5	1	0	0
KAI37_01341	265.007	867.384	489.22	438.771	357.174	673.729
KAI37_01342	70.46	306.616	160.782	272.254	187.348	425.801
KAI37_01343	60.534	153	103.998	212.959	156.477	307.47
KAI37_01344	79	299	141.528	409.809	270.306	555.332
KAI37_01345	28	127.681	46.973	126.998	71.164	159.654
KAI37_01346	27	126.418	50.065	132.213	82.536	191.876
KAI37_01347	63	208.901	102.433	330.996	237.994	452.138
KAI37_01348	33	109	61	541	540	1007
KAI37_01349	8	22	8	15	7	13
KAI37_01350	343	917	549	334	254	551
KAI37_01351	11	30	13	37	26	49
KAI37_01352	67	175	126	136	103	202
KAI37_01353	39	106	63	88	62	122
KAI37_01354	2073.97	6801.73	4479.42	2951.23	1636.89	3914.02
KAI37_01355	515.03	1848.2	1040.15	646.541	285.111	834.784
KAI37_01356	155	328	217	254	159	342
KAI37_01357	22.078	63	50.997	50	25.998	48.631
KAI37_01358	130.922	372	231.003	84	68.002	156.369
KAI37_01359	88	308	198	51	33	76
KAI37_01360	300.555	679	420.996	191.16	138	309.455
KAI37_01361	218.445	672	436.004	516.84	323	723.545
KAI37_01362	28	67	47	46	32	64
KAI37_01363	114	370	223	26	12	36
KAI37_01364	117	452	245	183	105	252
KAI37_01365	194.846	610	301	252	178	283
KAI37_01366	744	2161.61	1297.56	1243.48	657.945	1535.82
KAI37_01367	280	838.394	567.442	993.521	615.055	1409.18
KAI37_01368	9	25	22	12	12	25
KAI37_01369	14.243	34.161	23.279	57.744	35.31	58.987
KAI37_01370	33.757	150.839	85.721	76.256	34.69	74.013
KAI37_01371	12	52	17	9	11	16
KAI37_01372	1	7	3	7	4	7
KAI37_01373	4	19	7	2	2	6
KAI37_01374	7	16	10	6.561	5	6
KAI37_01375	6	29	13	14.439	4	15
KAI37_01376	24	72	38	34	29	49
KAI37_01377	28	72	51	14	13	36
KAI37_01378	3	11	4	2	2	7
KAI37_01379	14	52	26	19.007	14	45
KAI37_01380	4	9	1	8.993	3	10
KAI37_01381	4	16	8	16	14	24
KAI37_01382	148	418	283	108	94	157
KAI37_01383	28	49	37	37	20	48
KAI37_01384	39	68	41	45	41	52
KAI37_01385	94.53	219	146.599	874.265	595.549	1334.73
KAI37_01386	49.47	115	101.401	787.735	417.451	1193.27
KAI37_01387	503	821	555	131	63	138
KAI37_01388	89	293	168	52	39	82
KAI37_01389	7	24	11	3	2	5
KAI37_01390	9	32	17	3	2	15
KAI37_01391	50	111	69	49	39	56
KAI37_01392	9.901	12.001	18.874	5.745	4	6.673
KAI37_01393	80.46	206.43	162.126	71.401	62	118.325
KAI37_01394	62.639	126.569	91.999	37.855	34	70.002
KAI37_01395	1	2	3	1	0	1
KAI37_01396	6	25	19	13.955	11	13.135
KAI37_01397	30	76	50	38.045	18	57.865
KAI37_01398	28	77	46	39	40	53
KAI37_01399	7	29	14	13	6	19
KAI37_01400	12	17	16	6	4	19
KAI37_01401	1	23	17.766	17	10.676	26.39
KAI37_01402	30	75	42.234	39	23.324	61.61
KAI37_01403	4	19	12	1	1	3
KAI37_01404	25	81	69	45	21	67
KAI37_01405	2	8	7	8	4	11
KAI37_01406	3	4	1	3	3	12
KAI37_01407	1	3	0	8	6	6
KAI37_01408	17	29	32	7	13.84	11
KAI37_01409	1	2	2	3	2.16	3
KAI37_01410	0	5	5	0	0	0
KAI37_01411	0	3	0	0	1	1
KAI37_01412	0	0	0	0	0	0
KAI37_01413	13	44	37	20	6	39
KAI37_01414	726	1977	1491.83	5945.26	4190.97	8054.41
KAI37_01415	349	1059	648.43	4269.74	2970.03	5703.12
KAI37_01416	136	302	212	195	186	333
KAI37_01417	444.058	1353.97	884.102	646.384	627.974	993.659
KAI37_01418	779.738	1981.44	1334.9	743.616	773.026	1060.34
KAI37_01419	145.95	582.33	325.942	205.777	121.447	252.327
KAI37_01420	355.05	1199.67	757.058	386.223	222.553	510.673
KAI37_01421	20	92	59	43	18	52
KAI37_01422	86	258	144	222	161	332
KAI37_01423	431	1646.31	950.36	666.816	442.463	1020.01
KAI37_01424	48	214.694	108.64	119.184	65.47	177.99
KAI37_01425	992	3807.89	2140	2017	1086	2720.25
KAI37_01426	3592.43	9409.42	6046.96	3162.7	2852.86	4360.87
KAI37_01427	945.417	2655.84	1686.45	1305.22	1103.52	1660.79
KAI37_01428	1040.15	3534.02	2003.56	1898.56	1255.62	2958.93
KAI37_01429	631	2040	1159	4393.03	3974.91	6307
KAI37_01430	86	291.004	160	892.36	853.573	1216.38
KAI37_01431	28	100.325	64.349	325.058	326.934	449.965
KAI37_01432	37	191.672	115.651	454.523	506.586	740.654
KAI37_01433	0	0	1	2	0	4
KAI37_01434	1	1	1	0	0	0
KAI37_01435	578	1753	1094.99	1109.42	1112.97	1633.04
KAI37_01436	87	240	154.009	189.578	244.033	272
KAI37_01437	578	1921	1171	1605	1940.6	2656
KAI37_01438	323	939	596	619	749	972
KAI37_01439	97	345	238	380	180	478
KAI37_01440	5581	18781	11242	5814.29	2933	7724.68
KAI37_01441	434.005	1002	621	693.109	435	926
KAI37_01442	0	10.006	3.113	5	1	2
KAI37_01443	45	129.994	87.887	111	67	115
KAI37_01444	124	464	269	295	193	406
KAI37_01445	1	0	1	0	1	0
KAI37_01446	17	47	34	6	11	15
KAI37_01447	148	441	291	728	386	945
KAI37_01448	99.004	367.138	207.048	498.966	362.563	680.173
KAI37_01449	188.996	901.862	498.952	1410.03	1049.44	1851.83
KAI37_01450	552	1471	925	2146	1464	3053
KAI37_01451	0	0	1	1	0	0
KAI37_01452	894.576	2750.48	1697.57	2093.33	1211	2727
KAI37_01453	30.695	122.912	79.131	135.788	69.461	193.007
KAI37_01454	215.729	631.605	414.869	576.878	308.495	757.996
KAI37_01455	26	67	39	105	40.044	101
KAI37_01456	61	157	107	6	3	11
KAI37_01457	1	0	0	3	0	1.076
KAI37_01458	7	9	7	5	1	3.924
KAI37_01459	614.213	1705.61	1044.4	1027.63	746.579	1424.27
KAI37_01460	608.787	1910.48	1177.6	1726.63	1100.65	2514.89
KAI37_01461	76	216.916	121	189.741	112.766	293.844
KAI37_01462	71	175	117	98.993	85.337	192
KAI37_01463	58.63	147.654	69.441	160.711	109.89	204.924
KAI37_01464	65.37	225.346	134.559	311.298	214.208	433.076
KAI37_01465	13	33	26	37.378	39.565	63
KAI37_01466	206.77	726.763	473	642.081	462	917.812
KAI37_01467	187.231	371.237	257	336.539	314	554.188
KAI37_01468	7	32	12	5	6	14
KAI37_01469	197	679	429	609	361	856
KAI37_01470	518	1389	925	244	214	367
KAI37_01471	275.161	716.006	474.558	254.756	294.282	384.091
KAI37_01472	260.839	710.996	423.442	356.244	288.718	446.909
KAI37_01473	983	3181.46	1797	1265	717	1899
KAI37_01474	3	15	3	5	2	3
KAI37_01475	0	1	3	9	1	4
KAI37_01476	4	1	2	3	0	2
KAI37_01477	133	331	218	40	28	56
KAI37_01478	7	7	9	0	4	2
KAI37_01479	2	9	5	5	1	3
KAI37_01480	1	8	8	4	0	4
KAI37_01481	36647.7	105695	71551.9	28502	10218.5	35554.8
KAI37_01482	610.258	1500.07	1162.65	814.933	315	1006.33
KAI37_01483	506.742	1561.93	1153.35	1264.07	475.543	1616.79
KAI37_01484	645	2023	1241	1833	884.457	2371.01
KAI37_01485	1987	6511	3968.07	417	547	712
KAI37_01486	2556	8607.98	5287	29923	15947.4	44042.4
KAI37_01487	488	1643	949	2126	2003	3364
KAI37_01488	47	137	78	36	40	64
KAI37_01489	99	368	190	443.567	306	758
KAI37_01490	124.205	538.268	290.694	220.321	87.124	319.304
KAI37_01491	112.795	365.732	219.306	75.679	47.876	128.696
KAI37_01492	43.584	147	74	84	47	98
KAI37_01493	61.416	188	134	139	112	222
KAI37_01494	207	700	411	77	42	93
KAI37_01495	12	50	30	26	9	35
KAI37_01496	54	140	92	25	24	58
KAI37_01497	1	4	5	1	1	1
KAI37_01498	2	1	3	7	0	1
KAI37_01499	70	215	113	680	306	1058
KAI37_01500	19	49	33	37.009	38	60.451
KAI37_01501	24	80.545	47.996	68.306	58.999	127.508
KAI37_01502	20	77.455	36.004	55.684	32.001	74.041
KAI37_01503	212.693	830.996	507.428	233.779	137.316	324.324
KAI37_01504	109.307	352.67	216.596	289.553	140.684	383.676
KAI37_01505	69	185.334	113	175.668	106	258
KAI37_01506	41	147	103	42.391	27	54
KAI37_01507	18	45	45	19.04	25	30
KAI37_01508	22	65	46	57.569	30	61
KAI37_01509	71	248	158	273	131	332
KAI37_01510	9	37	33	14	7	13
KAI37_01511	1	5	3	1	2	3
KAI37_01512	0	2	2	1	0	1
KAI37_01513	16	15	17.005	3.345	5	12
KAI37_01514	8	26	12.995	9.655	6	11
KAI37_01515	1	12	6	3	7	11
KAI37_01516	2	12	4	3	1	5
KAI37_01517	0	3	0	1	1	3
KAI37_01518	20	45	25	18	9	20
KAI37_01519	2	1	2	4	0	4
KAI37_01520	3	8	3	5	0	6
KAI37_01521	1	5	1	2	0	4
KAI37_01522	4	13	4	10	8	8
KAI37_01523	5	21	15	9	7	10
KAI37_01524	81.17	228.761	119.731	33.999	12	42.498
KAI37_01525	241.83	799.239	508.269	70.001	36	73.502
KAI37_01526	78	254	185	92	61	93
KAI37_01527	10	46	37	23	25	42
KAI37_01528	108	419	223	187	118	258
KAI37_01529	11	77	38	17	10	16
KAI37_01530	188.732	646.026	366	238.548	141	297.461
KAI37_01531	336.268	1126.97	695	707.452	426	927.539
KAI37_01532	14	46	24	20	14	28
KAI37_01533	58	197.172	103.369	100.995	41	119.586
KAI37_01534	54	194.828	113.631	49.005	26	58.414
KAI37_01535	64	193	118	74	40	72
KAI37_01536	179	614	315	347	258	475
KAI37_01537	21	66	50	95.997	68.001	126
KAI37_01538	45	134	95	131.003	76.999	199
KAI37_01539	145	496	319.652	145	189	258.389
KAI37_01540	93	294	195.348	214	134	307.611
KAI37_01541	89	291.598	191	66	59	150
KAI37_01542	1	2	2.001	1	1	3
KAI37_01543	184.998	544	351.999	204.494	105	268
KAI37_01544	151.002	485	317.006	269.506	196.007	377
KAI37_01545	27	82	54	46	27.993	50
KAI37_01546	34	89	36	37	26	48
KAI37_01547	9	47	28	55	19	58
KAI37_01548	45	132	77	75	52	84
KAI37_01549	17	59	43	81	145	156
KAI37_01550	0	2.9	0	0	0	0
KAI37_01551	2	6.1	6	6	12	11
KAI37_01552	37.657	85.105	72.892	20.989	20.005	30.998
KAI37_01553	50.968	121	92.919	52	30	85
KAI37_01554	1	1	0	1	0	3
KAI37_01555	0	1	2	0	0	2
KAI37_01556	85.672	288.597	189	87	109.365	111
KAI37_01557	63.328	190.403	96	55	44.635	73
KAI37_01558	4706.95	17012.1	10412.1	5812.31	1634.03	7487
KAI37_01559	1753.71	4781.31	2954.69	708.856	458.905	958.296
KAI37_01560	2897.46	8293.1	5296.59	1937.81	1260.6	2655.68
KAI37_01561	1955.35	5127.44	3546.25	1693.9	1002.85	2270.99
KAI37_01562	517.199	1165.3	921.64	423.788	344.161	604.155
KAI37_01563	2386.7	5921.85	4113.52	2591.64	1759.6	3748.08
KAI37_01564	3	21	15	9	14	25
KAI37_01565	73	251	130	440	557	704
KAI37_01566	687	2039.76	1254	450.605	441.536	728
KAI37_01567	116	448.225	252.999	224.207	188.748	366.279
KAI37_01568	614	1761.01	1155	489.187	373.715	659.179
KAI37_01569	405	1031	658	463	401	678.542
KAI37_01570	0	3	0	2	1	2
KAI37_01571	1	4	2	3	0	3
KAI37_01572	6	8	1	3	0	2
KAI37_01573	0	2	2	1	0	3
KAI37_01574	8	27	10	11	12	24
KAI37_01575	3	7	1	6	3	6
KAI37_01576	175	400	227	347	258	410
KAI37_01577	9	25	14	11	5	25
KAI37_01578	3	6	7.003	7	5	17
KAI37_01579	10	23	18.997	11	5	26
KAI37_01580	2	19	18	7	4	7
KAI37_01581	0	5	2.111	2	1	8
KAI37_01582	22	36	21.889	9	12	10
KAI37_01583	178.32	538.228	350.999	320.168	191.511	421.257
KAI37_01584	58.68	143.772	107.001	116.832	53.489	146.743
KAI37_01585	2207.03	5844.08	3537.07	1507	875	2072.01
KAI37_01586	1	2	4	0	0	1
KAI37_01587	3	9	4	0	0	1
KAI37_01588	1442	4149	2686	1547	900.103	1998
KAI37_01589	124	248.002	188	137	104	226
KAI37_01590	57.904	191.033	96.855	129.046	91.896	164
KAI37_01591	423.04	1227.81	829.586	1052.9	759.916	1554.43
KAI37_01592	680.056	2113.15	1294.56	1252.05	885.188	1694.86
KAI37_01593	2018	7614.32	4202	5539	3133	7639.01
KAI37_01594	19	57	40	22	13	35
KAI37_01595	3	16	9	405.906	247.855	548
KAI37_01596	2	13	6	86.614	40.145	82.997
KAI37_01597	1	6	2	47.386	40.092	78.896
KAI37_01598	5	22	18	99	50.908	118.106
KAI37_01599	0	0	2	1	1	0
KAI37_01600	195.463	712.286	411.207	256.12	106.162	355.76
KAI37_01601	79.537	233.719	155.793	126.88	55.838	167.24
KAI37_01602	8	13	19	9	7	12
KAI37_01603	504	1711.91	1004.64	874.343	812.611	1309.39
KAI37_01604	873.638	2451.26	1508.28	2355.45	2175.16	3602.65
KAI37_01605	440.362	1433.74	833.72	1423.2	1415.45	2171.07
KAI37_01606	56	169	106	126	93	185
KAI37_01607	1560	3806.97	2595	298	129	388
KAI37_01608	84	266	154	209	175	305.992
KAI37_01609	82	289	182	310	169	436.008
KAI37_01610	8	15	10	9	13	19
KAI37_01611	0	6	5	26	11	48.377
KAI37_01612	5	7	10	24	30	43.623
KAI37_01613	577.437	1669.3	1112.24	972.828	690	1378.19
KAI37_01614	358.563	1216.52	743.758	762.809	481.586	1047.45
KAI37_01615	116.512	252.955	203.934	253.393	202.414	369.968
KAI37_01616	98.967	244.79	165.621	259.276	214.43	367.611
KAI37_01617	78.521	203.427	134.446	174.695	157.57	314.779
KAI37_01618	28	101	68	74	33	107
KAI37_01619	171	563	321	329	288	532
KAI37_01620	1	0	0	0	0	0
KAI37_01621	1	0	0	0	0	0
KAI37_01622	2	9	3	5.996	2	6
KAI37_01623	11	35	8	15.004	9	25
KAI37_01624	0	10.06	11	13	8	13.99
KAI37_01625	3	8.94	2	2.995	1	6.468
KAI37_01626	1	3.002	2	2.005	2	4.541
KAI37_01627	13	38.998	19	10	4	17
KAI37_01628	94	288	161	104	68	144
KAI37_01629	120	523	289	85	50	140
KAI37_01630	29	127	71	157	72	208
KAI37_01631	110	399	232	205	107	278
KAI37_01632	6	37	19	23	17	26
KAI37_01633	3	14	5	6	9	13.996
KAI37_01634	18	74	37	46	36	96.568
KAI37_01635	6	29	19	33	26	44.436
KAI37_01636	349	1099	679	748	393	997.222
KAI37_01637	14	32	16	33	19	55
KAI37_01638	417.011	1091.27	764.504	262.43	214.562	388.414
KAI37_01639	789.478	1878.94	1247	516.779	521.62	762.282
KAI37_01640	695.512	1755.79	1194.45	956.791	826.817	1401.3
KAI37_01641	52	130	93	35	25	55
KAI37_01642	41	88.994	63.381	71.736	50.517	115
KAI37_01643	32	69.006	51.357	67.254	35.483	58
KAI37_01644	358	1193	650	329	177	426
KAI37_01645	0	0	0	2	0	0
KAI37_01646	2	1	0	4	2	0
KAI37_01647	0	1	2	3	0	7
KAI37_01648	26	61	49	38	41	65
KAI37_01649	4	14	3	15	14	22
KAI37_01650	20	60	37	28	20	40
KAI37_01651	52	186	94	81	54	151
KAI37_01652	151	518	318	1232.01	1335	1758
KAI37_01653	2	1	0	0	0	1
KAI37_01654	0	0	0	0	0	0
KAI37_01655	5	13	15	3	8	14
KAI37_01656	5	6	5	3	3	7
KAI37_01657	7	10.687	3	7	4	15.779
KAI37_01658	3	2.313	3	8	5	3.221
KAI37_01659	2	7	2	3	4	9
KAI37_01660	11	23	16	10	9	14
KAI37_01661	32	122	71	35	25	53
KAI37_01662	26	43	32	31	17	39
KAI37_01663	20	50	41	34	25	62
KAI37_01664	1	0	0	0	0	1
KAI37_01665	1	4	2	1	0	1
KAI37_01666	1	3	1	5	10	9
KAI37_01667	50	116	84	40	59	51
KAI37_01668	0	0	1	1	0	0
KAI37_01669	100	213	122	128	71	166
KAI37_01670	13	58	33	44	66	78
KAI37_01671	6	21	22	22	16	38
KAI37_01672	16	71	38	109	69	172
KAI37_01673	14	30	17	39	29	56
KAI37_01674	476	1616	867.432	875	708	1267
KAI37_01675	6	14	5	16	13	12
KAI37_01676	429.101	1487.72	843.632	1866.72	1718.51	2760.76
KAI37_01677	252.899	891.347	484.368	1557.99	1278.49	2381.24
KAI37_01678	5	12	7	7	14	26
KAI37_01679	6	24	9	6	10	16
KAI37_01680	71.999	196	87	29	24	74
KAI37_01681	28.001	83	49	33	23	51
KAI37_01682	92	300	201	131	74	197.851
KAI37_01683	5	18	22	17	15	22
KAI37_01684	0	2	0	0	0	2
KAI37_01685	16	39	28	13	3	11
KAI37_01686	3	12	1	2	3	5
KAI37_01687	4	7.307	9	7	8	5
KAI37_01688	5	15.693	15	5	5	8
KAI37_01689	4	1	0	4	2	4
KAI37_01690	2.105	5	4	2	5.325	3
KAI37_01691	7.895	17	11	10	8.675	10
KAI37_01692	7	19	19	27	18	28
KAI37_01693	7	65	21	30	20	38
KAI37_01694	13	43	18	56	36	56
KAI37_01695	410	1208	745	911	642	1311
KAI37_01696	0	0	0	0	0	0
KAI37_01697	105	338	214	72	40	90
KAI37_01698	60	158	126	61	55	78
KAI37_01699	0	1	0	1	2	1
KAI37_01700	24	75	33	22	17	29
KAI37_01701	947	3395	1973.02	1628	901	2252.03
KAI37_01702	1	0	0	0	0	2
KAI37_01703	4	0	1	4	7	9
KAI37_01704	449	1319	779	2780	1713	4580
KAI37_01705	0	2	0	3	0	1
KAI37_01706	187.556	581.092	349.656	160.994	117.61	237.103
KAI37_01707	237.516	649.963	407.732	318.312	217.811	388.775
KAI37_01708	224.7	684.688	408.793	418.11	306.581	557.92
KAI37_01709	97.228	269.257	158.82	174.584	111.999	222.202
KAI37_01710	63	202	125	161	110	220
KAI37_01711	1	21	7	16	23	21
KAI37_01712	17	51	24	48	21	68
KAI37_01713	277.49	691.856	472.196	254.653	204.765	362.105
KAI37_01714	155.917	416.909	256.52	206.543	114.913	235.62
KAI37_01715	141.593	531.344	331.284	333.803	157.801	382.275
KAI37_01716	453	1624	1009	771	571	1214
KAI37_01717	226	809	493	803	391	934
KAI37_01718	110	364	197	257	159	349
KAI37_01719	266	925	509	129	81	171
KAI37_01720	365.185	1067.5	613.328	376.662	179.435	481.265
KAI37_01721	217.585	621.241	440.128	467.023	220.104	623.048
KAI37_01722	298.23	858.256	643.543	675.315	385.461	902.687
KAI37_01723	63	245	167	125	70	161
KAI37_01724	21	93	59.19	45	35.959	80
KAI37_01725	149	471	240.81	224	137.041	285
KAI37_01726	135	425.583	278	239.57	140.569	329
KAI37_01727	60	163.417	125	74.43	52.431	138
KAI37_01728	566	1508	988	852	457	1179
KAI37_01729	25	73	47	31	32	69
KAI37_01730	9	39	31	20	12	18.056
KAI37_01731	94.31	291.933	168.607	356.116	262.521	506.649
KAI37_01732	22.69	89.067	34.397	59.884	37.479	97.295
KAI37_01733	1419.07	4148.48	2571.04	1831.2	1300.14	2601.08
KAI37_01734	134.837	566.646	365.119	185.435	107.338	193.939
KAI37_01735	199.094	560.87	312.84	206.361	98.519	311.977
KAI37_01736	308	1067	574	1840	1062	2559
KAI37_01737	36	106	100	57	41	91
KAI37_01738	1330.27	4635.83	2678.52	2334.41	1206.37	3022.53
KAI37_01739	556.796	1642.17	1031.48	2435.59	1443.62	3139.59
KAI37_01740	15	15	15	26	19.001	29.321
KAI37_01741	37	137	70	28	28	39
KAI37_01742	217	652	404	369	219	508.007
KAI37_01743	168	520	288	208	116	301
KAI37_01744	27	70	42	66	56	74
KAI37_01745	2658	8961	5133.69	4581.98	2815	6551.51
KAI37_01746	77	188	134	94	58	157
KAI37_01747	56	206	104	109	65	115
KAI37_01748	1896	6729.98	3769	2490	1274	3510.83
KAI37_01749	239.017	841.434	514.013	369.046	189.61	467
KAI37_01750	185.983	654.566	356.987	400.954	206.39	502
KAI37_01751	397.863	1760.58	988.857	1428.6	766.519	2084.32
KAI37_01752	244.137	822.421	504.143	429.402	222.481	484.676
KAI37_01753	154.694	542.78	345.514	3640.21	2126.7	5393.86
KAI37_01754	66.306	146.22	90.486	1691.12	1187.27	2405.85
KAI37_01755	29	82	44	1033.68	687.032	1457.95
KAI37_01756	7	17	8	14	9	16
KAI37_01757	582	1829	1153	866	800	1296
KAI37_01758	153	523.114	338	299	160	453
KAI37_01759	440	1254	784	1008	575	1405
KAI37_01760	48	151	97	220	212	305
KAI37_01761	88	194	136	101	50	112
KAI37_01762	1161.83	4002.61	2421.57	1370.51	892.991	1979
KAI37_01763	568.242	1330.37	838.486	753.047	533.166	1038.26
KAI37_01764	398.924	1195.02	749.959	900.442	497.843	1146.74
KAI37_01765	102	356	212	285	194	463
KAI37_01766	101	324	220	323.82	195.838	395
KAI37_01767	39	106	85	115.18	67.162	144
KAI37_01768	32	119	74	78	50	113
KAI37_01769	120	410	282.003	194	122	284.995
KAI37_01770	3	9	5	1	3	3.005
KAI37_01771	80	289	162	94	47	127
KAI37_01772	173	602.039	316	343.982	241	496.896
KAI37_01773	3445	10088.3	6183	5330.02	2367.55	7434.1
KAI37_01774	25.66	50	42	54	30	55.588
KAI37_01775	58.34	129	90	100	81	160.412
KAI37_01776	1290	4781.3	2778.58	2178	1471	3102.61
KAI37_01777	0	4	0	1	0	0
KAI37_01778	257	769	449	152	114	254
KAI37_01779	23	63	50	47	21	43
KAI37_01780	0	1	0	2	0	1
KAI37_01781	2	3	1	0	0	1
KAI37_01782	0	5	2	3	5	4
KAI37_01783	1	4	5	9	3	6
KAI37_01784	2	9	6	6	10	15
KAI37_01785	16	78	55	16	20	22
KAI37_01786	4887.92	16959.3	10031.1	1263	541	1742
KAI37_01787	47	126.835	74.57	43.553	36	70.012
KAI37_01788	88	204.165	152.43	86.447	89	157.988
KAI37_01789	19	43	43	37	24	46
KAI37_01790	4	28	14	12	8	21
KAI37_01791	22	56	29	22	12.25	18.001
KAI37_01792	8	16	6	21	11.75	21.999
KAI37_01793	13	49	32.68	32	26	46
KAI37_01794	14	32	27.32	29	17	53
KAI37_01795	28	70	50	407	530	651
KAI37_01796	12	62	24	19	12	22
KAI37_01797	1	6	1	7	10	11
KAI37_01798	7	12	11	12	3	19
KAI37_01799	30	83	56	1571.78	828.08	2591.36
KAI37_01800	8	22.403	6	264.146	131.92	479.639
KAI37_01801	4	18.597	8	230.595	84.871	364.983
KAI37_01802	12	23	9	144.482	65.129	239.017
KAI37_01803	5	18	10	118	65	181
KAI37_01804	9	15	11	46	16	54
KAI37_01805	101	323	181	66	49	88
KAI37_01806	321.294	916	554	556	347	755
KAI37_01807	2	4.999	7	6	3	13
KAI37_01808	9	28.001	26	21	19	25
KAI37_01809	43	127	42	37	25	66
KAI37_01810	107	298	161	93	77	136
KAI37_01811	6	8	5	4	8	7
KAI37_01812	213	603	414	378	249	628
KAI37_01813	1282	3521.53	2448.98	1895.84	1255	3199
KAI37_01814	69	149.466	89.017	74.163	64	143.998
KAI37_01815	11	23	12	4	2	3
KAI37_01816	21	52	33	19	9	33.659
KAI37_01817	14	29	20	12	2	33.341
KAI37_01818	1	4	2	5	2	7
KAI37_01819	153	458	277	144	80	199
KAI37_01820	18	48	27	37	24	44
KAI37_01821	65	156	99	201	110	303
KAI37_01822	1	22	6	16	26	33.06
KAI37_01823	6	20	8	22	19	42.94
KAI37_01824	3	10	4	46	33	74
KAI37_01825	1	4	1	10	6	24
KAI37_01826	2	5	7	19	5	18
KAI37_01827	6	32	21	20.992	16	34
KAI37_01828	64	245	146	161.008	57	182.002
KAI37_01829	113.001	252.181	172	68	44	105
KAI37_01830	11.999	44.472	27	20	13.798	25.998
KAI37_01831	37	117.346	78	48	30.202	62.002
KAI37_01832	5	9	14	12	9	20
KAI37_01833	16	58	35	30	30	52
KAI37_01834	119	265	202	121	79	170
KAI37_01835	139	359	233	509	235.994	660
KAI37_01836	401	1266	808	1113	545.006	1376
KAI37_01837	0	1	2	0	0	1
KAI37_01838	3	27	13	5	2	1
KAI37_01839	4	9	12	10	14	17
KAI37_01840	12	40	18	36	24	39
KAI37_01841	7	17	11	57	18	64
KAI37_01842	13	35	21	32	42	74
KAI37_01843	90	293	161.027	52	37	98
KAI37_01844	22	78	43	28	17	35
KAI37_01845	41	164	91	73	30	95
KAI37_01846	20	47	33	128	155	198
KAI37_01847	4	37	17	54	54	113
KAI37_01848	17	69.219	36	87	48	114.237
KAI37_01849	20	72.781	44	41	30	55.763
KAI37_01850	7275.12	21922.3	13957.5	10217.7	5465	15302.8
KAI37_01851	204	601.431	393.433	189.312	131.448	289.002
KAI37_01852	103	416.569	264.567	140.688	74.552	207.998
KAI37_01853	114	302	204	341.4	324.645	493.003
KAI37_01854	96	318	200	1024.6	1279.36	1664.54
KAI37_01855	67	263	147	539	621	832.46
KAI37_01856	35	68	54	34	30	55
KAI37_01857	79.541	172.012	108.832	106.797	115.41	194.269
KAI37_01858	25.459	57.988	28.168	50.203	45.59	63.731
KAI37_01859	356	977	595	224	188	370.335
KAI37_01860	146.856	478.537	342	131.498	82.632	166
KAI37_01861	172.144	464.998	346.004	234.049	154.368	337
KAI37_01862	51.409	200.632	110.526	123.929	87.197	204.169
KAI37_01863	33.591	116.859	59.47	75.524	52.805	122.119
KAI37_01864	28.666	79.801	46	57	27.998	80.712
KAI37_01865	47.334	147.704	81	85	77	168
KAI37_01866	139	448	226	70	52	129
KAI37_01867	2	10	5	3	2	2
KAI37_01868	8	7	5	3	5	4
KAI37_01869	87	328	161	39	34	42
KAI37_01870	65	154	102	234	195	402
KAI37_01871	70	198.013	138	99	78	149
KAI37_01872	28	90	62	67	53	88
KAI37_01873	38	121	69	25	16	30
KAI37_01874	15	62	35	15	20	30
KAI37_01875	5	2	6	5	2	1
KAI37_01876	14	59	36	15	11	19
KAI37_01877	16	51	21	11	13	21.709
KAI37_01878	21	59	39	32	26	50.291
KAI37_01879	5	14	10	5	3	5
KAI37_01880	9	22	19	14	21	30
KAI37_01881	32	89	44	31	19	39
KAI37_01882	19	47	35	20	12	21
KAI37_01883	343	1135	658	440	318	685
KAI37_01884	5	4	5	2	9	1
KAI37_01885	17.007	37	24	49	31	88
KAI37_01886	3.993	10	5	16	13	26
KAI37_01887	1	0	1	6	6	7
KAI37_01888	99	253.539	148.354	198.477	132.276	298.002
KAI37_01889	48	168.461	98.646	164.523	129.724	263.998
KAI37_01890	7	35	21	23	16	14
KAI37_01891	50	165	97	172	105	224
KAI37_01892	48	180	95	99	46	101
KAI37_01893	1297	4249	2358	2292.13	1265	2960
KAI37_01894	651	1868	1042	1031.87	679	1472.71
KAI37_01895	44.341	102	76	155.825	139	197.334
KAI37_01896	190.093	600.265	338.568	921.161	771.341	1188.37
KAI37_01897	226.59	768.339	471.432	946.015	887.218	1438.81
KAI37_01898	277	854.395	479	1069.35	842.943	1449.15
KAI37_01899	268	903	519	768.709	571.086	1081.25
KAI37_01900	562.976	1371	804	917.941	642.914	1556.09
KAI37_01901	832.075	2448.78	1559.63	1049.42	849.115	1488.89
KAI37_01902	250.949	563.22	358.373	389.583	275.885	503.227
KAI37_01903	548	1494	968.279	1286.5	889	1848.71
KAI37_01904	163	370	251.722	471.631	341.142	667.366
KAI37_01905	512	1710	1084	1057.87	498.858	1447.92
KAI37_01906	138.611	445.483	235.798	192.435	98.607	262.112
KAI37_01907	1153.27	3434.32	2122.27	1471.38	809.156	2063.9
KAI37_01908	1311.53	4420.14	2678.39	3087.09	2516.99	4737.5
KAI37_01909	205.598	708.05	457.059	684.086	447.242	919.465
KAI37_01910	86.368	181.344	115.726	87.786	46.759	118.743
KAI37_01911	119.632	305.656	181.274	161.229	115.241	182.257
KAI37_01912	3248	12110.7	7231.29	3824.97	2544	5862.99
KAI37_01913	190.344	503	317.012	434.336	280	706.172
KAI37_01914	272.656	818	511	975.694	508	1187.83
KAI37_01915	13	23	12	33.896	29	62
KAI37_01916	173	591	337	571.305	480.416	813.985
KAI37_01917	13	21.998	15.049	36.141	33.472	58.501
KAI37_01918	12	37.002	25.951	97.553	91.896	127.513
KAI37_01919	119	287	211	124	93.216	188
KAI37_01920	11	28	17	13	7	18
KAI37_01921	37	79	63	117	87	174
KAI37_01922	157	542	323	318	154	430
KAI37_01923	127.608	323.584	194.405	806.976	870.847	1285.85
KAI37_01924	97.392	264.416	171.595	978.024	950.153	1448.81
KAI37_01925	170	433	295	125	107	202
KAI37_01926	1611.53	4088.25	2793.16	1815.94	1075.6	2426.56
KAI37_01927	526.18	1688.74	1023.87	1305.86	663.377	1760.03
KAI37_01928	248.309	760.305	477.263	686.252	341.045	846.689
KAI37_01929	767.982	2243.65	1317.71	1771.95	1015.73	2472.21
KAI37_01930	176.082	559.261	308.329	484.999	333.289	717.991
KAI37_01931	88.918	287.982	149.386	399.821	283.534	582.864
KAI37_01932	45	156.711	75.283	325.697	283.108	481
KAI37_01933	120	405.272	221.699	1087.71	859.002	1425.67
KAI37_01934	59.779	168.076	117.597	573.496	396.663	743.871
KAI37_01935	55.221	157.375	113.025	692.422	604.746	904.707
KAI37_01936	77	259.324	161.727	1107.96	911.451	1595.66
KAI37_01937	15.546	69	31	225.018	165.207	373.239
KAI37_01938	64.454	221.308	114.17	752	676.306	988.875
KAI37_01939	239	895.125	563.83	2260.37	2242.49	3452.2
KAI37_01940	38.773	134.337	78.099	437.357	418.786	596.355
KAI37_01941	21.864	49.23	31.096	182.603	171.398	286.184
KAI37_01942	82.364	305	181.805	762.463	673.914	1232.43
KAI37_01943	9.999	28.004	14.814	138.635	104.097	175.039
KAI37_01944	33.817	92.31	57.91	278.327	255.38	440.288
KAI37_01945	72.506	240.159	118.277	709.611	751.12	1154.46
KAI37_01946	205.677	645.592	389.51	1463.17	1580.64	2234.01
KAI37_01947	132.012	456.578	233.728	464.799	331.741	642.317
KAI37_01948	80.322	224.538	142.604	390.782	375.269	574.899
KAI37_01949	41.762	158.819	103.595	344.844	288.859	535.186
KAI37_01950	14.008	36	17	68.395	68.92	107.392
KAI37_01951	13	32	29	137.332	105.088	161.103
KAI37_01952	35	72	45	169.319	159	240.026
KAI37_01953	79	195.038	93	312.059	345.562	532.429
KAI37_01954	31.151	129.963	59	254.36	222.438	375.976
KAI37_01955	61.849	184.999	113.317	162.358	181.28	261.595
KAI37_01956	232	800.641	479.682	994.675	918.723	1463.63
KAI37_01957	141.001	485.359	262.002	939.844	901.19	1414.48
KAI37_01958	45.013	150.011	99.282	360.611	298.602	503.825
KAI37_01959	29.972	133.429	59.865	255.534	224.951	413.289
KAI37_01960	144.921	390.586	237.852	302.637	274.97	476.248
KAI37_01961	107.464	256.701	187.455	214.649	233.641	360.681
KAI37_01962	121.63	421.272	241.596	372.448	346.253	561.445
KAI37_01963	175	469.001	319.951	630.354	584.744	907.786
KAI37_01964	49	138	90	182.874	150.645	244.566
KAI37_01965	52.004	183.83	104.472	242.19	207.984	330.296
KAI37_01966	44.996	242.17	139.528	270.49	238.016	414.704
KAI37_01967	5046.65	16719.1	9482.79	7181	4707.49	10169.4
KAI37_01968	2479.17	7239.97	4657.89	4563.69	3460.43	6694.13
KAI37_01969	599.457	1876.93	1211.44	1466.4	1144.36	2041.96
KAI37_01970	406.406	1151.66	736.844	1273.2	844.274	1711.12
KAI37_01971	148.281	405.74	211.473	421.901	353.756	613.959
KAI37_01972	115.857	275.611	194.527	462.945	353.382	652.652
KAI37_01973	133.277	377.493	204	552.265	473.086	778.39
KAI37_01974	495.353	1673.18	1042.9	1337.85	889.132	1829.91
KAI37_01975	461.37	1421.33	915.093	1759.16	1394.73	2416.09
KAI37_01976	281	984	631	1324	770	1698
KAI37_01977	163	408	277.641	387.199	227.009	490.648
KAI37_01978	611.325	1826.81	1178.61	1892.06	1137.06	2607.09
KAI37_01979	61.289	239.348	157.158	253.062	126.931	360.489
KAI37_01980	211.988	459.858	307.498	386.216	260.01	530.292
KAI37_01981	3341.01	8843.32	5948.03	8410.71	5662.43	11327.3
KAI37_01982	157.391	422.607	273.974	354.781	200.561	509.103
KAI37_01983	85	258.061	164	442.462	258	525.085
KAI37_01984	46	183.119	127	376.303	239.499	505.473
KAI37_01985	659	2314.91	1300.85	1280.25	760.511	1751.53
KAI37_01986	2031	7426.97	4200.15	3168.96	1935.69	4207.62
KAI37_01987	1492	4574.73	2780.05	3822	3030	5365
KAI37_01988	12	30	10	37	21.077	57
KAI37_01989	253	779.371	439.48	569.695	315.135	811.183
KAI37_01990	133.989	396.629	174.52	228.373	182.788	377.817
KAI37_01991	164.223	644.12	387.925	105.382	31.137	134.017
KAI37_01992	435.777	1570.89	875.754	374.618	217.863	566.154
KAI37_01993	817.053	2731.08	1641.27	1881.76	1705.2	2918.16
KAI37_01994	367.578	1301.2	787.749	1549.24	1371.57	2248.87
KAI37_01995	387.368	1357.71	780.302	1403	1084.23	2039.97
KAI37_01996	3711	10507	6726	3011	1835	4353
KAI37_01997	37	86	51	44.118	30	60
KAI37_01998	6	12	7	15.882	5.998	8
[truncated: 3,308 more rows]
