# Supplementary material for: Transcriptomics differentiate two novel bioactive strains of Paenibacillus sp. isolated from the perennial ryegrass seed microbiome
Source: Sci Rep. 2021 Jul 30;11:15545. doi: 10.1038/s41598-021-94820-2 (PMC8324883; doi:10.1038/s41598-021-94820-2)
Supplement: Supplementary file 4 — Supplementary Information 4. [file 41598_2021_94820_MOESM4_ESM.xlsx]

## Sheet: S02
Supplementary Table S11a. Transcript quantification (raw reads count) results for samples used in the bacteria-pathogen interactions assay (strain S02)
gene_ID	S02_ctrl_1	S02_ctrl_2	S02_ctrl_3	S02_treated_1	S02_treated_2	S02_treated_3
KAI36_00001	545	601	907	848	1217.56	884
KAI36_00002	302.117	312.599	435.29	422.175	537.86	417.243
KAI36_00003	42.883	38.401	67.71	35.825	81.448	44.561
KAI36_00004	880.994	1020.88	1039.27	676.741	878.894	771.785
KAI36_00005	254.841	356.072	300.235	179.197	236.461	228.12
KAI36_00006	5651.21	7065.44	8878.16	5969.07	8047.27	6839.2
KAI36_00007	208	383	1496	597	125	497
KAI36_00008	5181.95	6540.47	6793.02	4452.86	5695	5231
KAI36_00009	750	840.645	968	847	1211	1003
KAI36_00010	0	0	0	0	0	0
KAI36_00011	9.219	10.409	14.365	8.167	24.877	22.507
KAI36_00012	0	0	0	0	0	0
KAI36_00013	1292	1673	2107.88	1664	3896.82	1846.64
KAI36_00014	165	195	195	334	520	273
KAI36_00015	859.028	1043.99	1220.04	867	1090	1120
KAI36_00016	831	969.006	979.209	577	810	755
KAI36_00017	249.347	293.695	347.905	183.399	252.009	264.066
KAI36_00018	1256.5	1754.05	2372.89	1961.73	5334.44	1899.03
KAI36_00019	1075.98	1653.25	2322.01	1353.67	4487.44	1487.91
KAI36_00020	2013.39	2654.04	3719.2	2573	4695.69	2704.51
KAI36_00021	1386.79	1808.22	2586.85	1580.57	2931.09	1810.22
KAI36_00022	530.805	675.346	924.356	743.429	1392.32	719.272
KAI36_00023	88.002	110.085	162	88.167	121	88.72
KAI36_00024	240.004	298.915	384	257.833	319	314.28
KAI36_00025	2448.03	3207.94	4202.18	4144.64	7291.07	4018.06
KAI36_00026	233.597	286.936	353.499	231.278	260.176	281.015
KAI36_00027	291.403	332.064	402.025	254.722	315.824	277.985
KAI36_00028	8688	11088	12453.4	5442.53	8104.04	9140.59
KAI36_00029	246.77	297.136	268.492	142	202.764	209
KAI36_00030	271.676	333.169	280.874	161.022	280.103	188.466
KAI36_00031	418.554	491.695	620.634	352.978	453.133	416.602
KAI36_00032	14532.8	17459.2	23529.7	22335.4	35001.6	18005.5
KAI36_00033	39	49	70	41	50	71
KAI36_00034	206	260	228.282	172	253	196
KAI36_00035	286	359	376.718	264	380	359
KAI36_00036	35570	28177.7	36450.9	27919.4	50253.6	37769.1
KAI36_00037	6056.64	7307.16	8002.7	5203.82	7374.3	6690.37
KAI36_00038	4761.87	5423.84	6214.34	4165.22	5820.77	5117.57
KAI36_00039	4	1	3	6	8	2
KAI36_00040	188.837	217.063	271.023	158.004	209.832	182.003
KAI36_00041	762.234	1028.71	1192.43	719.191	819.187	865.07
KAI36_00042	4878.18	6027.76	6554.63	3432.41	4350.62	4873.76
KAI36_00043	5017.98	5766.51	6625.83	3606.39	5098	5432.85
KAI36_00044	2184.77	2581	3310.49	2170.6	2961.08	2561.01
KAI36_00045	467	564	493	305	523	438
KAI36_00046	895	1056	975	569	982	953
KAI36_00047	6312.64	6657.84	6836.06	5064.15	7308.16	6270.03
KAI36_00048	3721.6	3813.44	4054.93	3267.85	4653.97	3630.42
KAI36_00049	3375.67	4982.5	6700.04	3505.11	2834.35	5279.86
KAI36_00050	2196.16	3224.68	4038.5	2076.31	2043.14	2547.47
KAI36_00051	5346.49	7781.83	9887.28	4211.93	4862.38	6160.23
KAI36_00052	9537.25	12422.8	14641.4	8575.83	10732.3	10939.8
KAI36_00053	10727.3	7796.11	9447.4	5252.52	11673	12379.1
KAI36_00054	8889.49	9702.58	10853.6	5449.99	9171.59	9171.31
KAI36_00055	4469.91	4953.93	5269.03	2988.51	4840.27	4537.68
KAI36_00056	1417.31	1627.08	1741.01	1162.43	1395.77	1412.27
KAI36_00057	1491.23	2003.65	2198.78	1389.18	1517.85	1588.74
KAI36_00058	17770.5	21091.2	24287.1	15355.9	22555.9	18909.3
KAI36_00059	418.11	499.763	528.956	322.968	522.119	486.354
KAI36_00060	263.229	363.473	416.439	223.39	395.063	335.359
KAI36_00061	261.25	321.907	364.605	256.642	320.818	304.287
KAI36_00062	254.852	354.622	323.31	222.545	292.759	285.492
KAI36_00063	485.148	600.378	638.69	406.985	537.038	474.508
KAI36_00064	798	945	1260	904	1326	973
KAI36_00065	443.873	584.325	611.267	336.835	527.228	518.383
KAI36_00066	599.275	614.61	760.988	499.635	846.715	642.617
KAI36_00067	229.543	229.046	276.748	187.824	253.058	227.498
KAI36_00068	207.31	248.019	234.997	183.705	250	226.503
KAI36_00069	25.002	33.32	27.092	23.97	30.642	20
KAI36_00070	198.136	282.613	271.939	154.288	187.209	198.627
KAI36_00071	114.862	155.068	114.807	51.742	90.149	99.192
KAI36_00072	660	827.999	796.163	624.003	817	754.181
KAI36_00073	2413	2675.27	2966	2210.01	2425.32	2630.77
KAI36_00074	1838.85	2390.32	2003.87	1583	1960	1852.13
KAI36_00075	295.153	433.685	296.131	240	326	282.226
KAI36_00076	2533.01	2696.99	4050	2621.01	3053.38	3070
KAI36_00077	2329.14	2625.93	3282.65	1785.61	2185.96	2216.54
KAI36_00078	6537.95	7322.03	7141.76	3959.67	5825.65	5695.42
KAI36_00079	4649.39	4976.57	5390.93	3066.7	3968.16	4299.36
KAI36_00080	4223.19	4727.73	4445.01	2414.34	3481.67	3454.99
KAI36_00081	2663.08	3091.42	2738.89	1459.24	2116.14	2075.44
KAI36_00082	1068.25	1216.75	1059.87	573.543	899.077	829.318
KAI36_00083	70595.1	83070.6	68183.1	37691.6	62945	54148.4
KAI36_00084	780.565	878	849	387	719	599
KAI36_00085	0	0	0	0	0	0
KAI36_00086	0	0	0	0	0	1.533
KAI36_00087	#N/A	#N/A	#N/A	#N/A	#N/A	#N/A
KAI36_00088	3423	3190	4145.05	4269.02	6213.02	5137.1
KAI36_00089	506	565	564.003	529	621	674
KAI36_00090	631.101	761.271	815.212	747.827	902.352	774.758
KAI36_00091	315.41	329.732	470.323	426.94	475.495	476.793
KAI36_00092	924.488	1038	1282.46	1448.23	1670.15	1270.45
KAI36_00093	2	7	0	10	9	10
KAI36_00094	967.298	1030.42	1564.1	823.347	1800.81	998.038
KAI36_00095	160.624	219.434	292.798	166.351	341.288	156.521
KAI36_00096	218.077	222.009	289.782	207.302	399.905	214.44
KAI36_00097	5900	6123	8078.15	7705.06	9656	8336.01
KAI36_00098	263.644	297.787	392.548	232.487	366.575	299.938
KAI36_00099	226.356	250.213	362.452	196.554	332.425	253.062
KAI36_00100	571.469	646	751.52	578	860	682.513
KAI36_00101	406.523	494	452.816	294.534	457	379.574
KAI36_00102	1380.5	1640.86	1523.87	1967.41	3513.11	1988.93
KAI36_00103	425.701	501.143	470.131	1128.59	1978.89	941.067
KAI36_00104	32	30	50	35	56	45
KAI36_00105	50	56	55	69	100.012	83
KAI36_00106	99	125	94	69	111	106
KAI36_00107	318	322	416	633.68	612	485
KAI36_00108	6222.14	9407.85	13109.8	6695.69	5917.95	7892.96
KAI36_00109	18161.4	26944.1	32842.9	14125.3	15037.5	20077.9
KAI36_00110	461	596	542.125	356	560	488
KAI36_00111	271	328.384	539.999	305	399	373.001
KAI36_00112	205	232.616	380.001	167	270	204
KAI36_00113	292	405	512	351	515	397.221
KAI36_00114	137	190	234	133	206	175
KAI36_00115	51.104	61.498	64.124	52.004	38.225	57.097
KAI36_00116	65.896	103.502	124.876	73.996	68.775	106.903
KAI36_00117	204	227.139	304.97	174	208.138	234
KAI36_00118	411	480.861	579.076	388	491.862	483
KAI36_00119	129.051	181	146	59	69	105
KAI36_00120	409.949	482	713	486	414.018	552
KAI36_00121	6871	8729	9097.35	4530	8196	6370.35
KAI36_00122	3751.56	4030	5538.26	3362	5321	4059
KAI36_00123	115	141	137	107	174	143
KAI36_00124	100	95	163.623	108	123	126
KAI36_00125	16	19	22.377	19	20	17
KAI36_00126	163.459	257.317	260.477	124	197.114	194.239
KAI36_00127	115.541	143.683	137.523	84	122.886	102.761
KAI36_00128	50	92	66	45	60	52
KAI36_00129	314.606	453.305	401.937	231.485	341.092	323.42
KAI36_00130	1405.39	1625.69	1776.56	1240.52	1722.91	1595.58
KAI36_00131	236	391	604	250	236	344
KAI36_00132	143	184	142	81	117	116
KAI36_00133	6	11	9	3	11	5
KAI36_00134	41.453	47.465	58.289	32	41	41
KAI36_00135	43.547	46.535	36.711	35	47	23
KAI36_00136	35	55	55	26	28	39
KAI36_00137	64	76	248.01	98	58	83
KAI36_00138	6172.67	6572.02	8257.94	4968.03	6746.82	6963.93
KAI36_00139	896	1132	1163.98	1018	1018	987.076
KAI36_00140	645	584	636.628	524	784.185	619.145
KAI36_00141	25982.9	29745.6	36829.8	28680.6	36230.8	30813.7
KAI36_00142	1781	2214.04	2155.28	1285	1694.69	1637
KAI36_00143	5075.57	6358.41	6252.22	3330.2	4326	4782.92
KAI36_00144	3863.16	4813.71	5021.97	2897.1	3286.73	3747.75
KAI36_00145	871.172	913.47	958.172	1092.81	1356.8	998.864
KAI36_00146	3618.1	4519.05	4655.08	3009.11	4795.32	3737.53
KAI36_00147	1404.34	1568.55	2146.45	1337.99	1944.59	1598.68
KAI36_00148	2554.54	2917.73	3896.28	2626.02	3836.11	2981.69
KAI36_00149	0	0	0	0	0	0
KAI36_00150	1790.54	2998.77	3916.57	1588.34	1608.14	2412.48
KAI36_00151	433.592	647.95	759.529	348.661	315.395	522.477
KAI36_00152	#N/A	#N/A	#N/A	#N/A	#N/A	#N/A
KAI36_00153	#N/A	#N/A	#N/A	#N/A	#N/A	#N/A
KAI36_00154	0	0	0	0	0	0
KAI36_00155	2	2	0	1	0	3
KAI36_00156	8.723	4.001	7.487	16.59	4.762	9.711
KAI36_00157	4	7	3	2	6	4
KAI36_00158	0	0	0	2	0	5
KAI36_00159	1	1.5	0	3.472	2.733	0
KAI36_00160	0	1	0	1	0	0
KAI36_00161	4	0	2	1	5	2
KAI36_00162	0	0	0	0	2	3
KAI36_00163	21	13	5	16	20	17
KAI36_00164	0	0	0	0	0	0
KAI36_00165	91	90	101.005	74	107	87.018
KAI36_00166	20989.1	22195	31711.4	24287.3	35508.4	23926.4
KAI36_00167	392.071	487.021	532.489	373.532	583.056	528.498
KAI36_00168	487.359	547.295	626.626	425.154	723.996	594.131
KAI36_00169	257.286	303.443	354.031	293.575	398.81	348.985
KAI36_00170	223.284	258.241	260.029	253.276	308.139	268.386
KAI36_00171	162	230	298	170	200	214
KAI36_00172	188.138	191.08	274.551	116.431	193.718	178.263
KAI36_00173	76.886	103.623	103.909	40.453	97.282	65.737
KAI36_00174	340.316	475.533	534.316	221.08	415.82	377.655
KAI36_00175	180.411	213.213	227.97	146.921	226.058	170.951
KAI36_00176	127.249	167.551	175.254	119.114	146.125	128.429
KAI36_00177	204	335.002	377.548	182	262.466	231.008
KAI36_00178	176.247	251.15	252.073	145.533	205.54	184.42
KAI36_00179	192.775	238.249	248.054	145.673	254.36	182.502
KAI36_00180	246.997	275.599	313.324	168.795	297.029	228.07
KAI36_00181	2876.93	3430.26	3395.19	1945.93	3255.69	2624.89
KAI36_00182	2281.07	2663.04	2890.81	1810.17	2758.39	2498.11
KAI36_00183	909.18	1064.86	1303.3	802.161	1108.52	1064.12
KAI36_00184	471.115	566.66	728.243	478.441	598.834	617.783
KAI36_00185	588.425	652.427	827.974	536.169	656.582	734.443
KAI36_00186	1208.28	1397.09	1944.48	1157.35	1499.08	1523.65
KAI36_00187	729	824	1104.91	980	1518	1054
KAI36_00188	775	997	1266	568	950	870
KAI36_00189	6543.42	8712.01	10256.4	5636.9	7375.86	8403.43
KAI36_00190	7105.81	7686.2	9500.17	6660.82	9418.45	7078.71
KAI36_00191	0	0	0	0	0	0
KAI36_00192	7247.7	7965.06	11879.9	8081.08	15143.8	8384.91
KAI36_00193	27398.7	31056.1	42967.1	30476.6	46943.2	30018.5
KAI36_00194	7005.68	7489.97	9244.45	6819.67	10919.4	7478.74
KAI36_00195	4167.78	4687.45	5926.21	3581.38	6243.88	4450.09
KAI36_00196	9905.23	10988	13030.7	9661.46	15322.7	11043.8
KAI36_00197	18316.8	19159.6	23299.9	19981.7	31410.4	21057.3
KAI36_00198	159	167	182	172	199	214
KAI36_00199	4850.65	5745	6764.07	3906.04	5540	5219
KAI36_00200	850	997.006	1082	946	1334	979
KAI36_00201	164783	196000	240252	235069	331520	239565
KAI36_00202	5	9	9	5	8	1
KAI36_00203	4	4	4	2	4	2
KAI36_00204	18	12	20	14	19	19
KAI36_00205	101	107.151	147	79	92	102
KAI36_00206	29	36	49	41	73	61
KAI36_00207	22.267	14.9	34.403	23.791	30.748	22.727
KAI36_00208	108.733	137.1	195.597	124.209	172.252	131.273
KAI36_00209	41	54	64	46	61	56
KAI36_00210	233	420	1989.94	822	120	521
KAI36_00211	99	125	139	160	174	168
KAI36_00212	204	297	368	227.002	229	247
KAI36_00213	1588.01	1917	2716	1666	2007	1977
KAI36_00214	46.008	43.796	81.512	88.999	122	120.346
KAI36_00215	37.383	43.319	67.455	89.004	91.84	80.411
KAI36_00216	46.604	46.869	78.571	74.997	107.981	92.69
KAI36_00217	122.005	132.015	176.462	119	217.179	178.553
KAI36_00218	175	179	227	198	254.005	202
KAI36_00219	3288.12	4651.8	6143.8	2811	2860.45	4052.52
KAI36_00220	3622	4782.2	5825.01	2688.01	3091.55	3917.26
KAI36_00221	108.535	109.355	220.36	133	176	143.327
KAI36_00222	60.465	86.645	141.64	67	109	114.673
KAI36_00223	126	162	200	137	145	165
KAI36_00224	139	185.008	216	85	162	140
KAI36_00225	58.281	71	83.584	51	78	65
KAI36_00226	59	87	82.416	45	44	64
KAI36_00227	178	188	364	190	294	231
KAI36_00228	93	96	147	76	129	109
KAI36_00229	128.748	175.066	225.268	204.233	181.556	202.615
KAI36_00230	42.252	77.737	77.75	76.767	40.455	75.385
KAI36_00231	271.434	330.197	453.492	322.223	271.449	336.001
KAI36_00232	803.566	967.496	1366.12	996.445	895.541	941.999
KAI36_00233	678	801.679	939.372	787.332	709.998	757
KAI36_00234	774.432	1026.81	1233.44	752.062	789.852	894.555
KAI36_00235	361.575	496.432	678.576	331.938	389.148	402.445
KAI36_00236	124	139	175	153	270	195
KAI36_00237	29	31.9	51.321	27.116	56.061	40.485
KAI36_00238	250	243.1	416.679	210.884	326.939	294.515
KAI36_00239	1760.08	2217.45	3584.84	2170.56	3290.26	2557.97
KAI36_00240	340.859	434.808	666.352	457.859	719.856	498.337
KAI36_00241	208.251	293.739	521.328	284.763	425.887	331.806
KAI36_00242	1977.86	2412.71	4276.01	2680.82	4268.34	2695.89
KAI36_00243	441.914	487.689	646.796	468.519	681.323	600.331
KAI36_00244	639.086	659.311	910.204	700.481	973.677	866.669
KAI36_00245	626.998	771.264	679.896	529	659	628.998
KAI36_00246	235.002	279.736	265.124	148	245	256.002
KAI36_00247	1498.9	1447	1562	982	1751	1681
KAI36_00248	255	458.994	3297	1825.22	143.95	964
KAI36_00249	321.361	416.006	370.963	322.002	491.959	343.36
KAI36_00250	129.639	192	166.037	135.998	220.091	145.64
KAI36_00251	53	62	70	44	66	64
KAI36_00252	276.169	330.74	455.111	372.293	673.845	387.404
KAI36_00253	400.831	430.26	640.889	445.707	828.155	461.596
KAI36_00254	31	50.512	59.559	39	60.748	52
KAI36_00255	109	130.488	183.441	118	134.252	128
KAI36_00256	228	225	246	221	376	269
KAI36_00257	268.01	259.657	323.276	235.444	351.807	312.619
KAI36_00258	609.99	645.351	735.724	582.556	772.73	613.381
KAI36_00259	173	203	300	178	167	191
KAI36_00260	207	259	308	178	251	221
KAI36_00261	1432	1931.27	2235	1804.24	3802.01	1760.01
KAI36_00262	150	148	226.999	141.647	160.998	186
KAI36_00263	162	202	211.001	138.353	176.002	177
KAI36_00264	193	225	233	365	408.51	280
KAI36_00265	268	339	302.001	1038	1959	810
KAI36_00266	32	39	53	29	32	24
KAI36_00267	322	391	626.4	481	950	525
KAI36_00268	3	11	5	17	12	10
KAI36_00269	9	11	31.983	18	24	19
KAI36_00270	43.284	40.714	51.618	42	85	41.039
KAI36_00271	54.716	87.286	72.399	46	110.999	63.961
KAI36_00272	13	10	13	15	34.001	18
KAI36_00273	2.26	4.259	6	4	1.051	3.151
KAI36_00274	34.74	30.741	27	23	36.949	27.849
KAI36_00275	51	61	61	38	49	58
KAI36_00276	174	197	224	173	220	206
KAI36_00277	877	1003.06	1128	682	1394	1003
KAI36_00278	820	1200	2206	936	1156	1285
KAI36_00279	51	74	74	44	69	58
KAI36_00280	1891.97	2715.24	3930.39	1968	1963	2125.96
KAI36_00281	0	0	0	0	0	0
KAI36_00282	95	102	106	56	65	85
KAI36_00283	103	106	192	74	107	91
KAI36_00284	98	120	154	88	151	110
KAI36_00285	5019	5831.15	7379.12	4165	6847.76	5350
KAI36_00286	30	30	46	17	27	24
KAI36_00287	40	59	72	55.046	87	50
KAI36_00288	429	529	827	458.954	589	580.999
KAI36_00289	185	237	302	151	266	223
KAI36_00290	33	31	61	38	49.468	39
KAI36_00291	57	70	99	47	96.532	52
KAI36_00292	0	1	0	0	0	1
KAI36_00293	365	394	674	439	589	513
KAI36_00294	194	222	258	166	189	164
KAI36_00295	284	376	522	642	486	332
KAI36_00296	341	407	339	221	276.009	285
KAI36_00297	398.615	465.459	597.185	284.175	385.451	415.252
KAI36_00298	613.805	780.452	932.878	438.344	635.947	678.457
KAI36_00299	126.58	172.594	178.174	80.482	118.756	121.929
KAI36_00300	1300.33	1612.45	1831.68	832.851	1114.65	1314.49
KAI36_00301	3495.67	4413.78	4839.08	2182.63	3365.1	3593.02
KAI36_00302	780	708	1144.25	1673	2498	1334
KAI36_00303	2368	2719.07	4464	2444	4323	3288
KAI36_00304	4209.03	4634.29	5726.6	6919.09	7495.35	5445.84
KAI36_00305	783.975	898.209	804.123	879.028	971.019	922.164
KAI36_00306	2545	3401	5063	2653	3401	3272
KAI36_00307	99	144	174.79	188	167	168
KAI36_00308	15	38	33	22	32	35
KAI36_00309	58	46	40	28	33	39
KAI36_00310	33	28	52.836	25	30	26
KAI36_00311	70	77.457	93.143	44	51	68.703
KAI36_00312	62	90.062	99.59	53.7	84	90.706
KAI36_00313	37	45.48	58.43	29.3	26	40.592
KAI36_00314	202	227.006	233	163.234	207.001	153.282
KAI36_00315	150	141.994	178	117.766	180.999	131.718
KAI36_00316	288	307	428	231	331	286
KAI36_00317	421	482	606.639	340	488	452.752
KAI36_00318	117	136	142.361	78	145	125.248
KAI36_00319	270.49	266.923	414.663	255.483	389.855	285.829
KAI36_00320	133.897	143.617	235.377	151.397	218.905	154.346
KAI36_00321	246.614	256.46	370.959	224.126	382.239	234.825
KAI36_00322	22	25	31	16	16	23
KAI36_00323	33	31	41	31	27	26
KAI36_00324	9	16	9.905	6	13.984	15
KAI36_00325	27	35	39.095	31	37.016	40.575
KAI36_00326	13	21	28	17	18	24.425
KAI36_00327	0	1	2	0	0	0
KAI36_00328	912.01	1024	1263	649	966	1068
KAI36_00329	33	38	37	16	23	35
KAI36_00330	5689.79	5709.16	9010	6945.35	12370.9	8059.98
KAI36_00331	392.996	425.248	438.447	284	422	353
KAI36_00332	193.39	259.37	241.197	139	236	215
KAI36_00333	151.614	150.382	186.288	114.022	162	127
KAI36_00334	697.659	916.56	1048.88	647	1014.68	789.96
KAI36_00335	63.275	86.198	54.117	29	40.32	57.553
KAI36_00336	19.326	22.848	26.844	14	11.83	15.488
KAI36_00337	79.491	98.393	87.67	45	43.951	65
KAI36_00338	208.25	300	224.486	102	123.219	157
KAI36_00339	33.318	26	41	14	23	32
KAI36_00340	316.682	449	380	215.001	354	303
KAI36_00341	4984	4339.85	5587	3741	7102.66	6002
KAI36_00342	7970	7398.92	9601	7817	12984.3	9606
KAI36_00343	116.805	115.979	140.34	109.378	128.569	105.281
KAI36_00344	37.195	45.511	66.66	45.799	56.738	66.719
KAI36_00345	123	144.51	266	148.822	195.693	195
KAI36_00346	114	139	172	99	174	149
KAI36_00347	552	736	921	854	693	695
KAI36_00348	1316.16	1351.84	1948.88	1413.79	2031.78	1713.97
KAI36_00349	304.198	348.437	553.793	367.03	533.473	509.905
KAI36_00350	275.663	305.977	433.989	303.364	504.242	424.203
KAI36_00351	576.254	691.59	877.262	673.822	1049.51	879.465
KAI36_00352	332.073	372.714	570.013	347.591	584.876	492.035
KAI36_00353	277.128	361.891	463.064	281.112	465.622	400.753
KAI36_00354	315.528	369.603	474.13	336.297	491.503	437.671
KAI36_00355	179	199.479	276.997	137	237	237.001
KAI36_00356	491	588.472	768.005	524	736	667.999
KAI36_00357	0	0	0	0	0	0
KAI36_00358	0	0	0	7.929	0	0
KAI36_00359	#N/A	#N/A	#N/A	#N/A	#N/A	#N/A
KAI36_00360	0	0	0	0	0	0
KAI36_00361	0	0	0	1	0	0
KAI36_00362	1	4	0	0	3	1
KAI36_00363	2	0	0	0	2	0
KAI36_00364	#N/A	#N/A	#N/A	#N/A	#N/A	#N/A
KAI36_00365	0	0	0	0	0	0
KAI36_00366	#N/A	#N/A	#N/A	#N/A	#N/A	#N/A
KAI36_00367	0	0	0	1	0	0
KAI36_00368	#N/A	#N/A	#N/A	#N/A	#N/A	#N/A
KAI36_00369	#N/A	#N/A	#N/A	#N/A	#N/A	#N/A
KAI36_00370	#N/A	#N/A	#N/A	#N/A	#N/A	#N/A
KAI36_00371	#N/A	#N/A	#N/A	#N/A	#N/A	#N/A
KAI36_00372	5	4	2	3	7	0
KAI36_00373	5	4	6	4	2	3
KAI36_00374	0	0	0	0	0	0
KAI36_00375	3	1	1	4	1	0
KAI36_00376	0	0	1	0	1	0
KAI36_00377	0	0	0	0	0	0
KAI36_00378	0	0	0	1	0	1
KAI36_00379	0	0	0	0	0	0
KAI36_00380	0	0	0	0	0	0
KAI36_00381	596.721	559.448	628.678	511.372	775.795	642.532
KAI36_00382	671.281	506.101	692.004	458.628	604.654	590.468
KAI36_00383	460	238.451	268.317	249	414.589	253
KAI36_00384	5289.03	3043	3568.13	3003.06	5023	3315.59
KAI36_00385	0	0	0	0	0	1
KAI36_00386	0	0	0	0	0	0
KAI36_00387	#N/A	#N/A	#N/A	#N/A	#N/A	#N/A
KAI36_00388	37	68	80	61	189	72
KAI36_00389	85	99	146	82	146	128
KAI36_00390	55.045	45	111.089	59	111	94.949
KAI36_00391	716.35	691.602	1001.88	681.839	915.289	744.052
KAI36_00392	529.618	543.452	843.991	526.933	690.87	640.246
KAI36_00393	1504.99	1729.94	2605.37	1529.23	1924.84	1872.03
KAI36_00394	15	24	49	21	25	29
KAI36_00395	4	3	8	8	2	11
KAI36_00396	9	9	11	10	16	13
KAI36_00397	1	0	0	2	3	2
KAI36_00398	72	76	74	88	148	109.015
KAI36_00399	354	291	494	366.18	542	442
KAI36_00400	2429	2323	3269	4089	6729	4068
KAI36_00401	431.663	476.134	709.62	591.843	785.091	596.451
KAI36_00402	108.337	178.866	164.38	160.157	202.909	177.549
KAI36_00403	3564.01	2684	3182	2249.02	3971	3264
KAI36_00404	3738.64	5163.19	5977.12	3066.02	2839.58	4121.19
KAI36_00405	1112.43	1401.32	1540.17	688.938	739.276	1025.28
KAI36_00406	291.104	385.672	378.927	185.59	208.869	294.908
KAI36_00407	396.075	564.891	595.345	285.954	309.179	432.856
KAI36_00408	2536.79	3894.47	5403.47	2294.5	2123.09	3283.17
KAI36_00409	175	226	183	109	116	159.199
KAI36_00410	383.761	541.198	737.972	421.72	321.616	461.583
KAI36_00411	560.456	748.961	1011.49	510.281	408.386	648.717
KAI36_00412	2898.24	4193.92	6172.58	2953.92	2438.19	3949.91
KAI36_00413	1816.54	2537.92	3372.04	1479.99	1513.09	2028.59
KAI36_00414	504	557	579	692	739	599
KAI36_00415	2310.09	3145.26	4109	1889.46	1703.81	2661.56
KAI36_00416	47787.8	69192	83541.2	37370.4	39063.4	51786.2
KAI36_00417	430	401	540	386	596	395.001
KAI36_00418	339	412.001	420.372	291	491.214	395.386
KAI36_00419	75	61.999	62.628	48	82.786	80.614
KAI36_00420	201	236	296	159	212	252
KAI36_00421	163	237	281	141	139	219
KAI36_00422	1238	1148	1176.17	823	1402	1342
KAI36_00423	1257.59	2130.36	3024.84	3002.69	1695.28	1455.14
KAI36_00424	894.406	1394.58	1737.16	1915.2	1132.72	1013
KAI36_00425	914	1047	1409	857	1108	929
KAI36_00426	19	54	28	37	39	26
KAI36_00427	518	598	810.007	584	779	541
KAI36_00428	966.001	1208.11	919.058	595	1065	792
KAI36_00429	447.699	555.653	617.801	465.108	639.602	424.726
KAI36_00430	154.301	198.044	214.14	167.892	241.398	164.274
KAI36_00431	399	487	550	307	409	305
KAI36_00432	815	953	1022	723	950	827.929
KAI36_00433	146.449	232.091	167.117	80	141.073	117.349
KAI36_00434	159.551	219.909	212.883	97	139.927	126.651
KAI36_00435	65.081	93.122	93.049	58.035	55.155	58.111
KAI36_00436	185.919	264.878	263.951	165.965	194.845	208.889
KAI36_00437	204.019	265	290	155	210	199.02
KAI36_00438	1696.12	1766.9	2230.81	1247	1883.74	1380
KAI36_00439	6230.16	6468	9650.53	6696.73	10207.2	7832
KAI36_00440	558	786	889	942	1735	934
KAI36_00441	22	13	20	12	25	15
KAI36_00442	13.24	17.997	32.008	14	24.62	22
KAI36_00443	12.76	15.003	8.992	16	15.38	17
KAI36_00444	1224	1555	2613	1179	1417	1335
KAI36_00445	2269.65	3112.1	3499	1495	1685	2361
KAI36_00446	58.435	79.742	118.082	60.234	85.431	70.443
KAI36_00447	86.565	82.258	97.918	111.766	132.569	103.557
KAI36_00448	345	326	742	452	641	514
KAI36_00449	18	23.992	42.365	12	9.195	27
KAI36_00450	17	22.016	24.635	12	18.805	10
KAI36_00451	9	27	37.991	6	12	15
KAI36_00452	911	1070	1665.01	1006.99	1101	1072.02
KAI36_00453	1367	1626	1463.03	983	1736	1264
KAI36_00454	115	180	145	77.086	110	147
KAI36_00455	274	282	314	384.914	614	400
KAI36_00456	313	373	368	205	281	296
KAI36_00457	59.405	84	47.845	30.603	66	56.891
KAI36_00458	85.595	113	139.155	58.397	112	114.109
KAI36_00459	90.615	94.554	94.305	65.096	78.036	97.44
KAI36_00460	51.385	51.089	46.934	44.906	59.146	64.635
KAI36_00461	69	89.357	81.761	55.999	90.818	82.925
KAI36_00462	641	877	1187	662	742	719
KAI36_00463	8942.4	6446.82	7572.73	3775	7522.31	8427.07
KAI36_00464	121.891	95	105	79	112	101
KAI36_00465	36	64	127	104	4	95
KAI36_00466	671.956	841.36	722.927	552.894	766.612	893.204
KAI36_00467	1462.04	1860.64	1865.04	1009.03	1700.39	1383.8
KAI36_00468	34	45	57.036	25.04	29	17
KAI36_00469	149	123	135	146.96	168	143
KAI36_00470	1077	1323	1534	983	1590	1207
KAI36_00471	140	196	203	110	122	139
KAI36_00472	1606.05	1962	2361.1	1472	1809.09	1821.43
KAI36_00473	432	474	624.99	353.002	541	562.45
KAI36_00474	5277	5442.12	7207.3	4654	6025.01	5718.01
KAI36_00475	1391.13	1754	1762	988	1583	1390
KAI36_00476	172	236	233	132	201	214
KAI36_00477	215	256	228	217	236	204
KAI36_00478	903	925	1217	679	903	760
KAI36_00479	468	612	642	538	738	606
KAI36_00480	550	544	720	444	678	605
KAI36_00481	0	2	0	0	0	1
KAI36_00482	118.002	140.374	172.832	87.312	107.356	118.177
KAI36_00483	946.7	1150.56	1397.17	1010.69	1516.64	1134.82
KAI36_00484	28.298	39	61	45	26	53
KAI36_00485	256	262	407	229	318	267
KAI36_00486	58	64	76	40	53	58
KAI36_00487	37	54	68	58	72	70.015
KAI36_00488	31	27	42	29	40	24.985
KAI36_00489	209	291	362	205	178	228
KAI36_00490	984.548	921.286	1136.09	978.242	1200.02	1026.99
KAI36_00491	917.452	992.714	1029.91	773.758	1027.98	936.006
KAI36_00492	291	298.227	278	261	357	322.002
KAI36_00493	0	0	0	0	0	0
KAI36_00494	1072.84	1051.96	1330.93	835.989	1255.9	1271.24
KAI36_00495	11	20	19	13	25	23
KAI36_00496	2859.01	4511.99	6139.91	3044.07	1932	3630
KAI36_00497	85.613	117.155	135.602	65	82.004	73.001
KAI36_00498	18.387	24.845	37.4	13.002	27	30.999
KAI36_00499	3075	2987	4268	2122.05	4514.94	2781
KAI36_00500	74	105	113	60.975	77	87.889
KAI36_00501	4996.4	6087.24	8208.44	4886.27	6522.98	6234.6
KAI36_00502	186	324	307	236	262	296
KAI36_00503	10	13	13	9	10	19
KAI36_00504	10	12	17	14	18	14
KAI36_00505	985	1163	1773	1052	1663	1143
KAI36_00506	596	648	836.643	440	710	613
KAI36_00507	641	969	1438	639.016	418	809
KAI36_00508	0	3	7	7	2	1
KAI36_00509	64	89	84	98.184	159	90
KAI36_00510	122	155	223	124	184	177
KAI36_00511	972	1026.83	1130	2134.16	2947.02	1809
KAI36_00512	2	4	4	1	1	2
KAI36_00513	8852.24	12384.1	17693.5	8125.9	7473.83	11293
KAI36_00514	110	82	81	93	115	125
KAI36_00515	52	54	53	50	102	47
KAI36_00516	98.843	126.908	135.774	50.621	81.937	117.952
KAI36_00517	40.851	70.092	73.983	39.04	38.671	51.048
KAI36_00518	163.306	175.129	233.243	131.941	103.392	166
KAI36_00519	28	32	50	34.399	47	47
KAI36_00520	19	33	24	18	13	25
KAI36_00521	205	271	292	215	368	272
KAI36_00522	78	93	88	63	107	71
KAI36_00523	342	409	481	446	568.001	417
KAI36_00524	59	44	71	50	69	63
KAI36_00525	20	31	27	27	27	31
KAI36_00526	133	153	174	141	205	153
KAI36_00527	173.999	213.241	254.153	149.982	251.117	197.864
KAI36_00528	158.001	166.759	154.847	91.018	181.883	139.136
KAI36_00529	70.004	94	98.592	58	73	61.561
KAI36_00530	6.996	8	5.408	7	6	6.439
KAI36_00531	903	955.998	1150	1057	1610	1205
KAI36_00532	53	66	91	51	35	64
KAI36_00533	533	743	896.125	475	644.024	566
KAI36_00534	69	73	79	46	45	50
KAI36_00535	1678	2047.31	1968	1190.4	1716	1594
KAI36_00536	121	157	162.998	107	132	152
KAI36_00537	1036.76	1118.2	1718.25	1004.11	1565.79	1270.15
KAI36_00538	498.244	478.802	695.099	521.887	784.211	626.848
KAI36_00539	51.339	68.486	65.437	51.051	90.999	76.787
KAI36_00540	76.661	68.514	107.563	51.949	140.001	94.213
KAI36_00541	250	275	414	274	437	359
KAI36_00542	145	149	229	148	198	214
KAI36_00543	35	39	74	45	69	54
KAI36_00544	562.836	729.024	670.302	414	643.424	522
KAI36_00545	148.16	175.976	151.698	119	144.576	128
KAI36_00546	245.004	272.001	226	209	255	221
KAI36_00547	93.528	130.949	131.649	78.525	92.792	108.002
KAI36_00548	104.19	156.373	148.596	79.475	108.673	130.78
KAI36_00549	372.283	420.678	367.589	227	269.535	328.218
KAI36_00550	119	157	155.166	99	122	127
KAI36_00551	249	260	267	151	256	210
KAI36_00552	30	26	36	28	43	43
KAI36_00553	20	40	36	27	33	15
KAI36_00554	70	68	88	68	85	76
KAI36_00555	348	376	459	395.506	466	430
KAI36_00556	26	20	28	16	23	15
KAI36_00557	22	17.008	22.001	21	26.652	17
KAI36_00558	33	36.992	40.999	27	44.348	35
KAI36_00559	2349	2483	3090.1	2616	3585	2939.36
KAI36_00560	653	697	795	655	826	749.997
KAI36_00561	47	45	50.661	47	52.511	51
KAI36_00562	75.856	93.371	110.007	51	77.377	74.563
KAI36_00563	126.144	160.629	194.331	118	223.113	177.437
KAI36_00564	58	70	91	39	62	55
KAI36_00565	700	890	936	573	752	727
KAI36_00566	117	134	186	134	168	172
KAI36_00567	395.969	354.324	583.674	558.932	864.175	617.513
KAI36_00568	74.031	81.844	116.326	86.068	128.825	128.487
KAI36_00569	284	314	404	327	508	330
KAI36_00570	284.239	356.198	340.32	347.699	384	321
KAI36_00571	168.761	194.802	159.68	132.301	212	198
KAI36_00572	114	152	180	109	135	167
KAI36_00573	68.211	100.924	104.943	67.404	87.683	109.364
KAI36_00574	685.789	856.076	757.086	509.596	740.317	656.636
KAI36_00575	418	430	611	378	471	515
KAI36_00576	157.224	179.861	252.26	118.038	190.579	204.566
KAI36_00577	687.776	729.139	1027.74	603.962	811.421	794.434
KAI36_00578	2340	3239	4067.5	2425.01	1959	3225
KAI36_00579	622.597	771.614	991.841	561.384	1185.48	685.512
KAI36_00580	874.882	1183.7	1384.09	663.702	916.559	888.95
KAI36_00581	3094.04	4458.79	6042.78	3451.78	3855.57	4051.54
KAI36_00582	2836.05	3375	4706	2599	3470	3295
KAI36_00583	759	1033	1742	749	698	1119
KAI36_00584	66	70	84	65	118	85
KAI36_00585	30	38	45	25	33	32
KAI36_00586	28	32	43	24	31	29
KAI36_00587	0	0	1	0	0	0
KAI36_00588	7	15	10	12	14	7
KAI36_00589	10	5	7.978	8.86	6.629	6.351
KAI36_00590	29.679	60.885	56.019	23.14	28.371	41.146
KAI36_00591	28.854	36.713	38.238	33.862	44.14	40.61
KAI36_00592	159.467	151.401	187.765	151.138	182.86	134.893
KAI36_00593	5	19	25	11	13	10
KAI36_00594	1841.01	2204.91	2805.3	2267	3022.4	2070
KAI36_00595	0	0	0	0	0	0
KAI36_00596	12	6	10	10	3.121	6.435
KAI36_00597	13	34	40	27	22.879	15.565
KAI36_00598	355.824	431.651	528.627	285.001	386.287	329.372
KAI36_00599	180.173	259.05	330.444	143.139	199.279	215.29
KAI36_00600	426.005	494.299	557.928	331.86	433.434	425.323
KAI36_00601	58	41.798	65.782	38.543	34	32.446
KAI36_00602	21	36.202	48.662	18.457	38	30.554
KAI36_00603	36	40	52.556	36	55	56
KAI36_00604	22	27	34	16	36	31
KAI36_00605	81	110	125	83	113	80
KAI36_00606	0	1	0	1	2	0
KAI36_00607	43	49	70	55	78	57
KAI36_00608	14	14	21	14	17	17
KAI36_00609	1	3	5	3	2	6
KAI36_00610	254	268.49	403	302	484	266
KAI36_00611	176	169.315	203	157.925	214	185
KAI36_00612	69	81.685	88	63	80	70
KAI36_00613	145.193	158	202	131.12	166	153
KAI36_00614	94.198	84	143.454	84.88	129.816	121.428
KAI36_00615	215.609	265.006	328.546	210	261.184	300.589
KAI36_00616	621.052	636.001	1088.04	667	654	780
KAI36_00617	191	253.284	303	224	275	251.999
KAI36_00618	473.988	598.996	726.404	394.044	485.795	498.722
KAI36_00619	4400.7	5319.72	7464.73	3694.96	4733.2	5171.28
KAI36_00620	26	36.429	29	15	33	21
KAI36_00621	42	62.571	58	29	52	51
KAI36_00622	107	123	162	109	135	109
KAI36_00623	276	344.003	533	238	314	283
KAI36_00624	95	125	151	95	104	105
KAI36_00625	2	1	5	3	3	6
KAI36_00626	3199.41	3762.12	2649.05	1673.7	3006.28	2482.86
KAI36_00627	2752.97	2916.25	2417.5	1575.55	3338.82	2352.47
KAI36_00628	932.657	1058.24	922.48	720.749	1427.36	956.829
KAI36_00629	179.096	188.727	280.117	152.053	184.837	189.252
KAI36_00630	102.549	147.868	180.44	104.388	152.494	111.748
KAI36_00631	159.355	197.367	271.503	153.559	214.67	172
KAI36_00632	681	638	898.031	566	953	698
KAI36_00633	10	8	8	4	7	8
KAI36_00634	39	40.45	63.802	21.629	52	43
KAI36_00635	130	150.55	153.198	70.371	115	112
KAI36_00636	53	55.184	94	43	72	80.99
KAI36_00637	23	22.816	20	14	25	15.01
KAI36_00638	138	118	148.015	206.558	113.197	120.226
KAI36_00639	16	6	8.985	13.442	10.803	12.774
KAI36_00640	342	454.004	885	582	455	571
KAI36_00641	3018.26	2866.14	4280.61	3414.39	7493.89	5042.63
KAI36_00642	58.742	69.859	125.388	69.87	176.106	145.635
KAI36_00643	238.006	248.004	374.347	248	340	268
KAI36_00644	66.391	71.148	105.416	57.991	76.033	62.405
KAI36_00645	121.602	143.849	172.236	99.009	156.967	122.595
KAI36_00646	48	42	60	46	66	62
KAI36_00647	144	129	194	142.813	195	181
KAI36_00648	60	135	141	63	88	86
KAI36_00649	636.991	754	998.874	589	895	755
KAI36_00650	82.009	103	161.126	100	133	123
KAI36_00651	127	154.752	144.735	78	112.741	122
KAI36_00652	279	375.171	335.265	161	250.259	243
KAI36_00653	31.362	39.077	35.373	19	30.259	30.339
KAI36_00654	67.635	68	72.727	50	51.115	59.329
KAI36_00655	74.624	157.592	190.95	117.386	136.407	143.831
KAI36_00656	828.38	1053.44	1436.96	1006.61	1059.22	1044.5
KAI36_00657	49	50	57	27	53	47
KAI36_00658	63	89	105	87	117	86
KAI36_00659	198.99	215.058	237.192	135.098	231.719	189.849
KAI36_00660	237.01	342.942	263.808	134.902	227.281	199.992
KAI36_00661	84.02	80	92.833	67	90	71
KAI36_00662	106.668	143.998	184.403	116.612	235.003	134.534
KAI36_00663	330.311	373.002	393.764	295.388	666.997	351.466
KAI36_00664	652	793	879	599	850	749
KAI36_00665	951	991	1305	825	1450.08	1180
KAI36_00666	237.026	240	349	248	402	318
KAI36_00667	695	682	1003	692	1139	728
KAI36_00668	19.963	29.644	27.363	21.717	36.796	27.751
KAI36_00669	566.037	598.356	961.637	617.283	867.204	777.281
KAI36_00670	514.415	757.076	900.156	440.399	623.933	588.559
KAI36_00671	198.585	257.923	395.844	228.601	300.067	256.441
KAI36_00672	2091.96	2164.4	4013.17	2768.39	5728.46	3701.32
KAI36_00673	979.142	1045.61	1849.93	1221.45	2799.2	1747.76
KAI36_00674	1063.9	1143.19	2193.9	1575.17	3177.97	2027.31
KAI36_00675	5	6	3	6	5	6
KAI36_00676	211	405	890	414	247	449
KAI36_00677	460	665	1070	488	461	724
KAI36_00678	74	86	118	87	134	112
KAI36_00679	171	198	299	190	307	260
KAI36_00680	23	28	36	17	23	23
KAI36_00681	61	84	80	49	68	74
KAI36_00682	1	4	11	16	2	11
KAI36_00683	0	5	9	8	2	7
KAI36_00684	6	9	8	6	5	7.377
KAI36_00685	38.102	65.107	57.284	54.255	41.846	55.877
KAI36_00686	43.898	65.109	77.055	33.745	41.154	76.747
KAI36_00687	387	511.784	618.662	346	461	407
KAI36_00688	44	72	90.003	49.985	63.995	63
KAI36_00689	12	23	16.997	21.015	11.005	17
KAI36_00690	53.896	41	65.618	62	79	51
KAI36_00691	61.104	60	107.382	66	100	66
KAI36_00692	158	81	81	46	65	53
KAI36_00693	48	74	206	106	51	90
KAI36_00694	32	31	32	23	35	27
KAI36_00695	453	414	461	341	431.005	421.003
KAI36_00696	31	45	54	45	44	37
KAI36_00697	77	74	101	78	107	103.028
KAI36_00698	392	508	547.001	225	406.002	367
KAI36_00699	4653.31	4544.62	6356.11	4146.51	8050.89	4840.71
KAI36_00700	200.22	252.375	282.947	260.195	336.151	272.287
KAI36_00701	87	68	79.564	62	81	72
KAI36_00702	23	23.531	28	20.725	23.001	25.783
KAI36_00703	43	39.469	58	23.275	36.999	36.217
KAI36_00704	8	17	18.218	9	10	15
KAI36_00705	92	119	115.782	66	95	100
KAI36_00706	205	272	258	145	197	179
KAI36_00707	18	27	26	19	19	16
KAI36_00708	161	234	268	121	232	176
KAI36_00709	192	100	122	127	186	104
KAI36_00710	2573.59	3363	4816.89	2116.41	2549.01	3170
KAI36_00711	90	125	122	51	81	63
KAI36_00712	492	669	971.001	454	352	596
KAI36_00713	574.899	558.935	750.19	383.429	1969.93	1050.08
KAI36_00714	329.104	349.065	485.816	265.571	1255.61	675.925
KAI36_00715	392.996	386	503.994	340	1196.52	612.939
KAI36_00716	302.248	299.004	329.305	240	1232.94	537.823
KAI36_00717	157.752	152.996	186.695	131	632.256	322.239
KAI36_00718	682	810	1158.01	571	1237	793
KAI36_00719	257	357	464	304	424	387
KAI36_00720	474	568	591	330	428	458
KAI36_00721	1102.09	1241.17	1391.08	1018.88	1337.01	1135.31
KAI36_00722	1384.97	1366.3	1657.85	1186.12	1654.99	1600.69
KAI36_00723	4429	4783	6738	3932.94	6243.99	5009.81
KAI36_00724	13	30	17	12	20	18
KAI36_00725	182	231	207	148	225	173
KAI36_00726	384	534	561	515	818.069	628.002
KAI36_00727	328.999	394.837	498.421	359	458.677	282.667
KAI36_00728	727.001	875.309	1194.58	887.004	996.323	617.333
KAI36_00729	86	91.592	102.446	77	89	102
KAI36_00730	55	72.408	75.554	52	66	63
KAI36_00731	135	138	143	84	105	106
KAI36_00732	77.721	87.821	126	81	145	94
KAI36_00733	60.279	89.179	114	66	85	86
KAI36_00734	199	192	246.046	205	273	192
KAI36_00735	20415.5	21459	30175.6	21289.5	36874.2	25413.8
KAI36_00736	385.995	428	583	651	927.821	616
KAI36_00737	41.005	67	80	42	62	78
KAI36_00738	28.048	49	44.215	38	41.807	36
KAI36_00739	173	293	304.791	177	265.193	229
KAI36_00740	434.796	488.423	573.917	369.871	496.806	486.226
KAI36_00741	1296.2	1528.58	1542.94	1266.23	1691.19	1367.63
KAI36_00742	92.62	129.011	118.011	114	122.016	108
KAI36_00743	16645.3	24066.5	29942.2	13341.9	15218.4	18661.2
KAI36_00744	233	349	414	218	321	318
KAI36_00745	100	138	120	83	116	94
KAI36_00746	52	78	82	43	66	60
KAI36_00747	96	114	98	86	122	92
KAI36_00748	50	70	81.893	45	61	78
KAI36_00749	11502	9262	13791.8	11160	17134	15442
KAI36_00750	2984.08	4370.5	6156.49	2762.62	3112.14	3730.53
KAI36_00751	3635.46	5288.11	6679.44	3373.49	3523.94	4282.23
KAI36_00752	345.769	470.407	648.272	267.293	350.038	361.266
KAI36_00753	1551.01	2107.84	2364.19	1195.71	1474	1571.19
KAI36_00754	2648.7	3239.5	3468.66	2005.25	2320.87	2664.88
KAI36_00755	658.241	841.98	977.111	530.754	616.132	778.125
KAI36_00756	761.551	865.921	1257.57	752.622	1169.69	1007.52
KAI36_00757	431.504	473.366	837.429	428.378	671.311	699.48
KAI36_00758	1954.49	2013.52	3602	2307.04	3957.96	3295.23
KAI36_00759	222.233	247.773	386.509	258.607	483.333	417.865
KAI36_00760	163.415	141.417	288.252	223.393	402.479	255.135
KAI36_00761	228.85	238.439	499.184	341	622.328	450.002
KAI36_00762	274.502	286.729	499.724	309.999	567.232	431.196
KAI36_00763	102	130.832	181.333	111.001	214.668	146.802
KAI36_00764	43	52	66	48	63	68
KAI36_00765	427	566.001	547	426	569	491.396
KAI36_00766	977	1241	1398.19	767	1007.11	1150
KAI36_00767	237.066	308.682	288.594	257.34	301.735	262.404
KAI36_00768	86.934	70.39	102.409	59.66	70.265	72.609
KAI36_00769	94.545	135.551	120.249	77	90.515	108.74
KAI36_00770	114.455	120.378	152.749	115	142.485	126.247
KAI36_00771	38	43	69	36	88.543	42.144
KAI36_00772	10.905	16.786	12.543	15.656	18.28	10.856
KAI36_00773	83.119	122.586	142.8	77.661	131.301	115
KAI36_00774	233.976	313.005	359.708	208.683	374.557	259.15
KAI36_00775	422	537.622	605.948	314	607.319	399.85
KAI36_00776	165	231	210	104	195	139
KAI36_00777	114	147	148	86	133	139
KAI36_00778	2113	2477	2322	1651	2261	2018
KAI36_00779	143	196	204	116.013	201	157
KAI36_00780	451	616.464	890.252	469	756	606
KAI36_00781	63	74	107	43	74	73
KAI36_00782	55	64	73	61	55	52
KAI36_00783	43	40.284	53.938	25	59.725	49.62
KAI36_00784	133	174.852	182.062	109.139	182.344	151.361
KAI36_00785	83	101.864	125	89.861	112.931	84.019
KAI36_00786	191	256	291	256	257	220
KAI36_00787	0	0	0	0	0	0
KAI36_00788	0	0	0	0	0	0
KAI36_00789	#N/A	#N/A	#N/A	#N/A	#N/A	#N/A
KAI36_00790	151	185	191	118.006	139	137
KAI36_00791	1762	2005	2299	1594	2324	2067
KAI36_00792	37	59	72	41	81	53
KAI36_00793	976	1213	2000.06	1041	979	1259
KAI36_00794	210.941	275.719	337.842	223.762	341.419	288.433
KAI36_00795	1391.06	1916.28	2502.16	1609.73	2258.09	1705.57
KAI36_00796	99.485	116.12	156.25	85	122.626	132.912
KAI36_00797	199.517	249.61	301.423	209.508	301.392	268.691
KAI36_00798	275.998	318.27	345.327	248.492	378.983	353.397
KAI36_00799	146.723	177.009	187.381	116.249	181.664	168.929
KAI36_00800	30.934	29.685	45.62	28.219	38.261	39.051
KAI36_00801	64.021	85.212	73.986	51.478	77.466	54.741
KAI36_00802	287.742	312.769	354.329	297.485	453.375	365.504
KAI36_00803	211.58	267.326	275.684	231.57	370.234	286.775
KAI36_00804	406.739	454.325	372.386	248	464.914	263.04
KAI36_00805	125.261	182.532	140.614	87	158.086	130.96
KAI36_00806	432	493.681	443	313.646	498.357	406.682
KAI36_00807	333	378.319	323	206.354	399.643	293.318
KAI36_00808	190	272	268	172	231.04	249
KAI36_00809	18	18	20	25	29	29
KAI36_00810	161	175	206	162	153	202
KAI36_00811	66	76	53	36	55	45.366
KAI36_00812	132	177	218	151	172	159.634
KAI36_00813	38.087	50.965	42	28	35.325	26.582
KAI36_00814	103.913	140.035	93.999	65	101.675	76.418
KAI36_00815	47	52	60.001	41	39	34
KAI36_00816	420	431	529	303	459	459
KAI36_00817	62.777	59.636	50	46.454	72.875	68
KAI36_00818	47.224	58.706	51.999	47.546	80.125	45
KAI36_00819	372.999	440.947	511.001	284	626.048	450
KAI36_00820	412	529.71	642.262	266	462	451
KAI36_00821	211	252	271.248	136	170	199
KAI36_00822	598.541	727.837	1000.04	565.679	841.759	582.662
KAI36_00823	6453.71	6865.16	8771.28	6559.96	9539.57	7014.35
KAI36_00824	70.251	86.711	99.247	73	106.735	103
KAI36_00825	52.749	50.289	85.753	48	65.265	54
KAI36_00826	135.003	158.079	211.045	119	190.016	145.009
KAI36_00827	796.997	902.921	1199.51	558	1220.15	911.991
KAI36_00828	1013.8	1001.43	1714.12	1027.13	2012.49	1507.24
KAI36_00829	703.311	683.808	1257.6	834.599	1640.09	1109.94
KAI36_00830	1024.89	946.611	1646.51	1130.28	2335.42	1474.38
KAI36_00831	598	669	818	602	940	616
KAI36_00832	970	917	1641	979	1643	1294
KAI36_00833	11	29	16	27	23.832	19
KAI36_00834	18	24	13	10	26.168	10
KAI36_00835	21	28	25	21	35	28
KAI36_00836	149	204	229	142	156	181
KAI36_00837	2189.97	2900.57	3375.89	1921.17	3038	2495
KAI36_00838	484	631.981	592.136	267	546	429
KAI36_00839	3204	3872.02	4309.01	2574	5060.62	3554.03
KAI36_00840	662	715	1112	454	809	737
KAI36_00841	2718	1903	3198	2864.39	4973.22	2792.68
KAI36_00842	337	297	449.142	273	387	376
KAI36_00843	317.11	388.87	512.982	739.696	780.876	565.746
KAI36_00844	231.89	289.13	332.977	500.304	407.124	348.223
KAI36_00845	278	357.24	386.334	276.521	336.364	275.404
KAI36_00846	216	251.76	250.666	170.479	218.636	201.772
KAI36_00847	81	87	111	87	104	86
KAI36_00848	35	52.051	73	30	36	45
KAI36_00849	183	306	814	342	83	344
KAI36_00850	257.116	268.863	313.938	233.767	431.839	273.979
KAI36_00851	540.884	637.137	722.297	530.233	801.209	632.021
KAI36_00852	296	391	416.027	243	282	358
KAI36_00853	1970	2628.95	2815.01	1402	1996	1813.08
KAI36_00854	99	140	130	115.048	136	115
KAI36_00855	6	5	5	2.952	5	3
KAI36_00856	41	49	50	36	45	44
KAI36_00857	32.782	42.756	52.519	41.012	64.27	49.411
KAI36_00858	567.218	671.244	746.481	597.988	642.73	622.589
KAI36_00859	37	40	49	39	49.285	35.356
KAI36_00860	7	9	18	9	13.715	12.644
KAI36_00861	439.241	569	473.032	234	380.993	362
KAI36_00862	164.759	183	170.968	110	155.007	139
KAI36_00863	44	41	79	92	75	54
KAI36_00864	52	44	97	86	65	67
KAI36_00865	330	276	400	289	412	351
KAI36_00866	88.394	83.993	191.776	93.128	130	143.348
KAI36_00867	426.648	536.013	755.224	478.872	706.016	563.66
KAI36_00868	328	345.322	411.478	315.009	419.858	300.715
KAI36_00869	191.488	181.738	257.107	201.039	220.273	246.739
KAI36_00870	135.203	136.338	180.997	168.727	206.724	165.305
KAI36_00871	117.309	92.584	153.418	144.228	194.146	164.241
KAI36_00872	238	241	323	253	259	302.795
KAI36_00873	352.75	371.701	443.403	445	599.004	576.993
KAI36_00874	658.02	634.813	888.007	1072.71	1363.83	1195.11
KAI36_00875	141.561	144.351	180.649	273.88	361.58	239.929
KAI36_00876	395.86	413.336	517.041	599.407	750.167	668.898
KAI36_00877	36.808	50.798	55.9	64	79.01	66.975
KAI36_00878	4	26	634	279	7	39
KAI36_00879	15	17	20	13	14	23
KAI36_00880	49.462	60.549	75.237	41.715	61.315	37
KAI36_00881	866.538	1007.45	1186.76	704.285	1127.68	910
KAI36_00882	72.969	71.254	74.887	51.004	57.939	85.862
KAI36_00883	60.098	76.136	70.388	41.996	65.065	48.765
KAI36_00884	165.353	220.574	218.821	140	191.431	172.767
KAI36_00885	310.982	358.867	380.388	239.35	293.156	360.904
KAI36_00886	100.598	114.169	128.541	110.667	93.408	115.728
KAI36_00887	26	35	50	32	32	41
KAI36_00888	31	32.839	33.87	25	24	25
KAI36_00889	8	9.161	17.13	6	7	5
KAI36_00890	233	287	375	256	442	379
KAI36_00891	73	83	94	105	119	105
KAI36_00892	3074	2789.04	4613.87	5962.02	15366.6	7229
KAI36_00893	342	360	588	355	500.141	428
KAI36_00894	82	101	150	76	85	106
KAI36_00895	130	151	187	77	175	120
KAI36_00896	629	603	797.001	475.982	875	817
KAI36_00897	118.914	140.6	218.264	124.753	160.2	142.502
KAI36_00898	56.086	50.4	107.736	68.247	65.8	53.498
KAI36_00899	1170	1297	2543	3799.47	3779.63	4771.89
KAI36_00900	8.084	18.292	23.342	14.313	14.368	9.984
KAI36_00901	83.916	121.708	164.658	64.687	92.632	93.016
KAI36_00902	970.132	1160.62	1378.33	853.873	1386.12	1009.36
KAI36_00903	531.868	585.383	771.67	471.599	760.877	559.638
KAI36_00904	22	51	29	35	30	43
KAI36_00905	57	56	65	75	68	66
KAI36_00906	641	575	662	791.11	1073	811
KAI36_00907	7	2	1	3	5	1
KAI36_00908	1	7	2	1	0	0
KAI36_00909	15.261	19.613	23	9	16	9
KAI36_00910	65.739	76.387	59	56	65	77
KAI36_00911	16	28	22	13	8	22
KAI36_00912	37	49	56	27	53	52
KAI36_00913	34	43	57	30	45	41
KAI36_00914	9	9	32	19	16	22
KAI36_00915	24	20	29	33	29	26
KAI36_00916	45	48	78	59	73	66
KAI36_00917	120	141	157	128	155	134
KAI36_00918	310	338	422	320	421	371.101
KAI36_00919	11936	17590.8	30885.2	21948.7	15802.2	12731.3
KAI36_00920	144	134	180	129	132	115.994
KAI36_00921	284	379	346	204	263	242.006
KAI36_00922	93	115	966	352.027	106	504
KAI36_00923	62	78	66	34	68	59
KAI36_00924	197	288	217	107	176	187
KAI36_00925	782	849	959	781	1467	940
KAI36_00926	83	96	135.442	72	90.562	77.706
KAI36_00927	80	112	148.558	105.003	103.438	126.294
KAI36_00928	105	109.991	113.192	75	115.001	107.762
KAI36_00929	143.003	177.01	167.9	102.422	149.999	125.238
KAI36_00930	560.424	653.544	583.941	306.576	506.808	491.996
KAI36_00931	1588.57	2017.36	2044.36	1044.91	1720.23	1534.41
KAI36_00932	795.993	989.127	1145.66	614.09	936.965	844.59
KAI36_00933	6	8	9.998	6	6.18	6.411
KAI36_00934	23.743	28.002	35.002	17	32.636	22.785
KAI36_00935	7.257	10.998	13	8	13.184	14.805
KAI36_00936	1070.29	1167.32	1068.88	579.616	1118.85	872.989
KAI36_00937	506.714	634.676	505.122	279.384	504.149	427.011
KAI36_00938	988	1153	1095.02	676	971	819
KAI36_00939	38	32.607	37	27	43	29
KAI36_00940	1002	1016.39	1337	995	1588	1077
KAI36_00941	25	19	39	29	38	28
KAI36_00942	689	627	875	980.998	1343.36	946
KAI36_00943	1	0	1	1	1	0
KAI36_00944	8	13	8	6	8	6
KAI36_00945	1501	2011.49	1988.36	931	1668	1459
KAI36_00946	34	32	28	27	64	33
KAI36_00947	109	140	145	100	224.157	127
KAI36_00948	17	9	13	12	26.843	17
KAI36_00949	389.704	507.397	600.555	383.635	797.785	498.478
KAI36_00950	236.242	318.577	380.665	217.123	473.482	283.533
KAI36_00951	120.172	176.078	247.045	131.242	285.731	169.288
KAI36_00952	251.221	303.993	381.638	243.118	426.54	289.376
KAI36_00953	176.661	207.96	293.105	155.882	304.462	227.326
KAI36_00954	248	275	266	131	230	204
KAI36_00955	313.53	365.501	317.213	161.558	350	275.74
KAI36_00956	300.079	428.237	422.443	205.442	443.006	313.737
KAI36_00957	72.949	106.262	102.145	58	116.564	86.525
KAI36_00958	106.478	108.949	96.412	58	107.24	110.926
KAI36_00959	363.965	460.051	379.786	221	444.192	365.074
KAI36_00960	160	199	240	144	197	214
KAI36_00961	28	19	38	27	17	28
KAI36_00962	7400.33	6232.07	11964.4	5336.24	11217	10287.9
KAI36_00963	67	72.995	76.943	19	68.991	55
KAI36_00964	5386.21	5974.1	7105.06	5520.1	12238.5	7390.77
KAI36_00965	5035.61	6020.86	8265.99	5983.68	9435.59	6547.82
KAI36_00966	186	208	264.105	260	318.571	248
KAI36_00967	316	386	373.895	388	472.429	401
KAI36_00968	287	316	367	186	317	259
KAI36_00969	5	6	10	8.001	14	15
KAI36_00970	90	100	131	81.999	110	111
KAI36_00971	94.256	119.132	128.075	215.418	271.244	227
KAI36_00972	461.341	443.006	464.831	864.865	931.752	682.321
KAI36_00973	534.456	536.196	588.672	1050.13	1213.14	960.181
KAI36_00974	966.972	949.377	1168.26	1538.91	2085.37	1617.5
KAI36_00975	772.236	798.294	877.392	1171.45	1708.64	1252.49
KAI36_00976	213.764	227.996	255.811	525.153	628.423	451.511
KAI36_00977	103	107	100.441	178	235	205.996
KAI36_00978	140.157	167.576	175.046	229.747	335.319	247.566
KAI36_00979	98.809	109.243	96.877	163.511	207.68	159.78
KAI36_00980	95.034	108.679	93.145	112.123	173.001	153.66
KAI36_00981	149.306	169.881	156.392	265.559	367.845	248.735
KAI36_00982	344.694	408.61	438.446	350.059	448.668	409.48
KAI36_00983	1335	1456.01	1753.65	1380.07	1908.49	1597.78
KAI36_00984	0	0	0	1	0	1
KAI36_00985	2426.2	2536.78	3249.13	1755.59	2104.08	2218.69
KAI36_00986	1689.01	1786.22	2150.22	1227.15	1426.93	1588.31
KAI36_00987	14.956	19.977	19.254	4.151	27.77	19.822
KAI36_00988	123.044	191.023	176.746	98.849	135.23	88.178
KAI36_00989	0	0	0	0	0	0
KAI36_00990	21	25	17	18	15	15
KAI36_00991	22	16	18	13	11	15
KAI36_00992	207.194	270	219.875	109	191.322	186
KAI36_00993	117.081	143.865	131.978	71.765	117.118	87.395
KAI36_00994	284.721	359.135	258.147	133.235	261.56	204.605
KAI36_00995	13	18	18	15	18	12
KAI36_00996	20	30	37	23	41	24
KAI36_00997	10	6.279	16	5.44	20	21
KAI36_00998	899	862.721	1542.42	810.725	1174	1057
KAI36_00999	15	21	27	20	25	18
KAI36_01000	36.67	46.998	68.007	26.997	37	32
KAI36_01001	6.33	11.003	13.993	11.003	11	9
KAI36_01002	1	1.998	3	1	5	2
KAI36_01003	6	11	10	15	10	13
KAI36_01004	14	30	32	22	31	32
KAI36_01005	125	282	2297.01	939	90	491
KAI36_01006	533	656	958.211	502	663	621
KAI36_01007	845	1016	1371	829	1197	886
KAI36_01008	136	120.719	174.358	87	132	107
KAI36_01009	49.72	80.971	79.334	36.063	53.458	66.72
KAI36_01010	26.28	34.31	21.307	20.937	34.542	33.28
KAI36_01011	7317	10348.9	12437.3	5613.49	7230.8	7868.68
KAI36_01012	1566.23	2213.38	2912.87	1301.94	1539.05	1849.69
KAI36_01013	995.746	1488.64	1913.49	840.271	986.79	1266.28
KAI36_01014	325.027	479.274	472.675	233.301	268.162	367.211
KAI36_01015	102.318	188.953	240.898	107	163	136.332
KAI36_01016	72.682	87.925	93.235	62	82.92	73
KAI36_01017	51	58.488	72.584	42	74.081	72.668
KAI36_01018	52	65	86	46	59	49
KAI36_01019	114.597	169.242	249.952	120.005	142	167
KAI36_01020	69.403	96.918	115.892	46.332	69.351	78
KAI36_01021	91.736	153.84	163.696	79.663	110.649	106
KAI36_01022	52.659	89.002	116.744	59	68	76.359
KAI36_01023	140.604	173.998	191.916	121.39	182.52	146.336
KAI36_01024	16.648	20.553	20.732	8.61	20.48	20.305
KAI36_01025	23.107	15.545	19.17	16.834	23.892	15.281
KAI36_01026	111.245	169.902	207.852	99.166	185.108	174.719
KAI36_01027	313	404	561.007	265	367	399
KAI36_01028	39	43	41	17	28	35
KAI36_01029	88	141	145	59	75	79
KAI36_01030	9	6	14	12	13	9
KAI36_01031	11	23	18	11	20	12
KAI36_01032	12	12	16	22	14	10
KAI36_01033	917	864	1485.26	854	1398	1425.22
KAI36_01034	39.218	39.209	41.729	37.155	44.867	47.52
KAI36_01035	128.28	206.374	221.432	128.033	174.522	167.364
KAI36_01036	313	337	501	601	506	432
KAI36_01037	21	32	74.269	211.824	93	112
KAI36_01038	611	789	1532.73	4718.18	1855.13	2112
KAI36_01039	28	26	21	16	30	20
KAI36_01040	31	43	36	33	37	33
KAI36_01041	67.861	95.696	98	52	72	82
KAI36_01042	129.139	135.304	160.994	100	121	102
KAI36_01043	85.346	106.404	106.176	62.422	99.966	101
KAI36_01044	89.654	136.596	133.852	72.578	102.034	114
KAI36_01045	9	17	30	5.999	14	8
KAI36_01046	68.668	82.433	81.687	42	65.473	56.182
KAI36_01047	115.332	125.567	120.313	53	103.527	111.818
KAI36_01048	320.929	448.968	510.488	231.553	354.58	345.345
KAI36_01049	810.071	1069.03	1171.51	656.447	873.42	829.655
KAI36_01050	76	96	132	95	133	90
KAI36_01051	1	0	0	0	0	1
KAI36_01052	72.634	73.332	88.035	52.436	87.443	80.379
KAI36_01053	185.366	241.668	291.965	177.564	257.557	222.621
KAI36_01054	315	409	411.096	248	367	389.123
KAI36_01055	63	87	115	61.016	109	101
KAI36_01056	380	401.961	639.982	424.81	452.897	488.727
KAI36_01057	363.952	464.042	615.018	323.263	409.103	484.828
KAI36_01058	179.051	201.998	274	173.927	195.031	193.509
KAI36_01059	233	267	416	297	370	324
KAI36_01060	292	336	492	305	497	375
KAI36_01061	0	0	0	0	0	0
KAI36_01062	201099	197636	359391	215777	311072	232049
KAI36_01063	350	409	493	361	487	389
KAI36_01064	470	587	643.382	422	698	561
KAI36_01065	29.683	35.058	38	33.923	24	22
KAI36_01066	40.317	50.942	46	38.077	38.26	45.115
KAI36_01067	127	177	211	167	181.74	187.885
KAI36_01068	3	1	2	1	0	0
KAI36_01069	196	236	316	163	234	228
KAI36_01070	489.038	552.381	582.17	361.323	643.871	504.021
KAI36_01071	407.174	487.811	555.535	342.469	549.954	419.136
KAI36_01072	275.788	295.064	351.296	236.208	402.174	300.843
KAI36_01073	929	1134.56	1682	933	1294	1049
KAI36_01074	8730.36	13058.5	15434.8	7000.91	6053.35	9349.6
KAI36_01075	20441.7	21025.4	31683	20359.1	28273.9	26436.5
KAI36_01076	662	601	803.248	589	998.639	791.718
KAI36_01077	285	314.042	425.752	251	443	334.282
KAI36_01078	267	352	378	239	203	279.063
KAI36_01079	1074.87	1002.17	1467.48	964.235	1439.34	1428
KAI36_01080	2122.14	1899.84	2839.66	1666.59	2517.91	2573
KAI36_01081	4094.41	3722	5109	3478	5380.13	5076
KAI36_01082	188.412	178	219	170	224	216
KAI36_01083	68.576	69	99	58	84	62
KAI36_01084	124	120	163.035	66	117	77
KAI36_01085	1228	1609	2164	1059	1379	1478
KAI36_01086	289	414	611	297	436	357
KAI36_01087	1382	1714	2266	1572.35	2186	1579.01
KAI36_01088	27	18	33	25	35	27
KAI36_01089	489	592.234	802	513	743	551
KAI36_01090	118.993	134	146	105	152	143
KAI36_01091	21.007	41	47	39	43	38
KAI36_01092	11	14	18	14	18	13
KAI36_01093	309	370.059	506	324	453.633	364
KAI36_01094	967.98	1146	1420	937	1747	1217
KAI36_01095	1302	1367.11	1577	1535	2082	1486.13
KAI36_01096	514.876	627.624	517.231	367.545	453.271	472.235
KAI36_01097	320.766	407.107	409.413	259.758	345.843	318.818
KAI36_01098	471.358	546.269	556.356	413.697	672.886	543.947
KAI36_01099	1112.81	1272.68	1581.98	1216.88	2275.77	1082.03
KAI36_01100	189.188	165.328	260.016	112.117	225.234	184.969
KAI36_01101	18	19	31	26	32	14
KAI36_01102	198	197	245	188	249.202	201
KAI36_01103	38368.2	37631	58175.8	39207.4	46496.6	49565.2
KAI36_01104	3763.6	3810.87	5010.86	2924.61	4416.11	4131.67
KAI36_01105	9911.12	12447.1	19452.8	11920.3	20689	11646.7
KAI36_01106	763	1033	1130	630	1087	816
KAI36_01107	114	142	133	94	130	121
KAI36_01108	36	43	53	31	49	44
KAI36_01109	52	84	92	77	67	83
KAI36_01110	1034.41	1057.5	1195.24	700.648	888.108	1158.08
KAI36_01111	90.585	100.501	79.759	103.352	124.892	131.924
KAI36_01112	2	2	3	4	8	5
KAI36_01113	123	172	154	82.012	117	114
KAI36_01114	161.52	194.92	289.242	199.282	321.088	222.619
KAI36_01115	412.673	405.212	673	330.638	597.105	523.755
KAI36_01116	340.807	445.867	640.759	390.08	619.82	583.627
KAI36_01117	454	515	820	495	815	591.134
KAI36_01118	110.058	131	101	74	138	121
KAI36_01119	33.166	9.02	15.647	32	39.999	18
KAI36_01120	46.834	42.98	27.353	21	46.001	30
KAI36_01121	990.748	1159.1	2021.8	955.611	1319.11	1410.99
KAI36_01122	1175.72	1506.76	2786.91	1260.95	1832.99	1726.61
KAI36_01123	582.528	743.147	1339.92	734.099	986.97	868.397
KAI36_01124	37	55	71	47	73	46
KAI36_01125	23	21	18	14	20	15
KAI36_01126	76	77	79	69	82	92
KAI36_01127	355	458	392	179	300.851	339
KAI36_01128	155	201.371	206	153	190	209.025
KAI36_01129	317	481	346.046	231	288	342
KAI36_01130	63	74	89	49	44	51
KAI36_01131	57.638	67	91	75	76	53
KAI36_01132	118.945	106.586	131.804	61.246	152.993	118.734
KAI36_01133	127.417	144.414	212.196	125.754	147.007	165.279
KAI36_01134	155	143	185	142	198	161
KAI36_01135	227	306	291	105	203	235
KAI36_01136	721.37	914.513	825.189	319.698	690.701	698.052
KAI36_01137	199.582	304.026	214.434	99.916	202.153	173.775
KAI36_01138	401.048	552.461	527.377	246.386	395.146	372.173
KAI36_01139	286.42	335.695	309.092	189.896	286.487	260.827
KAI36_01140	223.58	287.305	271.444	192.104	256.513	228.173
KAI36_01141	5	8	15	9	10	10
KAI36_01142	22.396	17.998	17	24	22.386	23
KAI36_01143	55.604	43.003	64	36	69.614	70
KAI36_01144	186	242	305	232	314	250
KAI36_01145	2060.89	2264.03	3472	2967.97	4596.02	3596.43
KAI36_01146	54.408	80.704	92.705	57.166	85	73.301
KAI36_01147	75.592	99.296	115.295	60.834	98	98.699
KAI36_01148	77	107	142	80	78	85
KAI36_01149	1049.29	1303.55	1551.41	957.69	3677.75	1233.42
KAI36_01150	92.536	126.207	189.543	83.206	276.79	132.887
KAI36_01151	1319.17	1563.24	1829.25	1202.11	4193.21	1398.69
KAI36_01152	95.603	138.582	201.451	109	301.301	108.596
KAI36_01153	149.397	152.421	195.339	117	312.703	134.41
KAI36_01154	854.021	1069	1468.02	671	1804	995
KAI36_01155	84.447	111.333	164.404	80.56	208.935	107.587
KAI36_01156	272.675	364.162	369.999	217.417	630.613	260.4
KAI36_01157	117.193	148.094	134.394	96.457	268.102	130.013
KAI36_01158	144.608	137.408	163.563	92.566	312.774	132
KAI36_01159	299.056	345.144	398.64	250	888.81	308.653
KAI36_01160	161.008	188.226	203.657	114.475	426.653	154.141
KAI36_01161	1000.55	1240.39	1371.18	866.327	2438.12	1007.31
KAI36_01162	284.768	361.626	487.742	285.555	909.131	323.908
KAI36_01163	53.669	63.59	77.423	42.644	111.866	51
KAI36_01164	22	30.027	40	23	59	18
KAI36_01165	194	243	269	179	438	212
KAI36_01166	616	783	727	400	648.001	550
KAI36_01167	57	90	98	27	37	56
KAI36_01168	30	90.932	62	23.296	36	52.366
KAI36_01169	25	35.068	29	17.704	18	29.637
KAI36_01170	36	66	57.428	17	31	29.997
KAI36_01171	33	50.433	26.572	9	29	30
KAI36_01172	495	706.261	526.745	256.443	410.555	384.339
KAI36_01173	283	425.513	368.005	160.557	213.445	231.664
KAI36_01174	52.709	68.746	60.036	34	50	52.879
KAI36_01175	63.291	97.344	68.96	28	55.456	49.121
KAI36_01176	121	178.704	143.004	70	116.544	94.15
KAI36_01177	90	108.387	86	51	85.293	70.85
KAI36_01178	590.123	850.602	755.83	381.489	562.286	503.998
KAI36_01179	78.877	129.978	110.759	66.511	67.421	74.002
KAI36_01180	641.561	836.033	694.411	347	565	522
KAI36_01181	394.439	574.005	470	231	399	390
KAI36_01182	313	355	420.353	221	297.166	354.451
KAI36_01183	262.489	307.511	316.727	202.049	275.574	257.612
KAI36_01184	221.511	281.49	262.92	143.951	213.259	223.937
KAI36_01185	422	546	577.337	332	398.805	433.727
KAI36_01186	100.572	136.993	127.828	65.335	85.718	104.907
KAI36_01187	139.428	169.007	197.836	91.665	148.477	154.366
KAI36_01188	474.122	581	740	522	605	517
KAI36_01189	250.997	280.113	349.84	212.49	259.471	239.595
KAI36_01190	390.003	424.887	485.221	302.51	415.529	378.405
KAI36_01191	1431	1654	2289	1445	2476	1714
KAI36_01192	1770	1997	2524	2239	3318	2316
KAI36_01193	1276.12	1559.43	1759.65	971.031	1378	1221
KAI36_01194	272	358.566	421.651	282	285.012	228.998
KAI36_01195	172	172.21	116	80	94	94
KAI36_01196	129.994	146.341	63.311	57.278	85.264	56.464
KAI36_01197	383.091	486.071	249.569	114.722	212.736	223.877
KAI36_01198	171.397	200.066	113.628	61.998	116.15	90.033
KAI36_01199	296.321	329.342	181.067	114.002	152.661	122.915
KAI36_01200	233.218	237.489	167.954	90.654	132.275	129.419
KAI36_01201	99.388	125.171	64.261	37.346	62.745	70.707
KAI36_01202	360.62	376.866	199.949	114.613	212.167	156.159
KAI36_01203	269.971	280.681	158.262	75.847	142.002	133.425
KAI36_01204	167.17	190.997	111.28	52.198	118.839	95
KAI36_01205	386.526	437.784	233.903	113.03	214.983	187.522
KAI36_01206	716.07	666.263	386.128	193.312	450.177	366.145
KAI36_01207	246.969	267.058	172.878	89	180.999	154.332
KAI36_01208	390.265	466.661	288.821	156	300.001	247
KAI36_01209	895.67	1091	861	462.729	704	708
KAI36_01210	589	721.622	777.667	535.634	1084.28	579.004
KAI36_01211	596	760.378	660.333	467.366	834.722	548.996
KAI36_01212	136	165	190.755	86	101	126.763
KAI36_01213	239	270	363.245	264	422	259.237
KAI36_01214	3675.42	4455.84	5957.31	3458.22	4210.1	3879.92
KAI36_01215	766.577	922.705	1180.21	571.613	626.495	838.364
KAI36_01216	473	586.691	616.017	332	313	467.565
KAI36_01217	1295.43	1596.26	1942.48	899.509	973.96	1282.23
KAI36_01218	2614.57	3639.1	4166.5	2096.19	2261.45	2896.27
KAI36_01219	1183.85	1529.95	1894.66	932.516	1073.77	1268.37
KAI36_01220	1100.15	1497.64	1752.59	839.769	938.358	1177.27
KAI36_01221	1082.24	1378.42	1716.53	779.91	846.121	1155.65
KAI36_01222	898.726	1108.88	1398.92	585.406	713.063	1013.94
KAI36_01223	601.204	741.278	984.596	450.739	469.334	671.43
KAI36_01224	1479.89	1921.92	2269.52	1044.38	1230.96	1541.37
KAI36_01225	732.553	955.496	1155.44	527.561	663.523	774.281
KAI36_01226	507.381	713.546	1048.28	428	443.712	694.182
KAI36_01227	1366.42	1725.7	2150.19	968.789	1213.27	1434.59
KAI36_01228	433.947	491.755	537.533	318.211	475.021	511.234
KAI36_01229	327.009	404.704	438	227	296	312
KAI36_01230	7703.45	12380.3	20443.4	8433.8	8769.36	10823.9
KAI36_01231	21844.8	33749.1	53283.7	24456.2	23690.2	29513.4
KAI36_01232	410	536	626	294	442	461
KAI36_01233	653	688	780	613	644	619
KAI36_01234	105	138	194	103	147	153
KAI36_01235	3917.32	4591.49	5986.24	3142.17	3368.09	4205.66
KAI36_01236	2304.68	2865.6	3574.39	1889.61	2145.95	2688.84
KAI36_01237	837	1143.98	1295	979	979.961	1329
KAI36_01238	1032.53	1293.78	1782.35	858.561	914.629	1317.1
KAI36_01239	158.184	201.739	272.29	111.439	123.756	173.688
KAI36_01240	343.1	455.083	523.405	266.725	303.36	364.437
KAI36_01241	1682.19	2366.45	2705.95	1227.28	1462.26	1904.55
KAI36_01242	1490	1900.01	2352.84	1146	1366	1649
KAI36_01243	100	166	182	94	128	138
KAI36_01244	414	426	562	363	564	525
KAI36_01245	26.6	37.038	49.243	51	53.997	47
KAI36_01246	24.4	25.962	60.757	31	53.003	29
KAI36_01247	118.56	146.933	198.959	108.542	140.722	146.195
KAI36_01248	70.44	85.028	99.217	53.502	50.278	78.398
KAI36_01249	62	88.037	86.823	55.76	58.691	61.397
KAI36_01250	70	118.003	118.002	59.24	79.309	71.01
KAI36_01251	404	433.111	486	365	596	507
KAI36_01252	90.143	93.042	104.39	56	54.5	77.016
KAI36_01253	139.492	201.204	145.16	92.052	143.029	130.477
KAI36_01254	67.856	115.099	111.47	65.854	71.844	89.858
KAI36_01255	313.509	406.654	371.981	264.094	358.627	345.649
KAI36_01256	1194	1272	1684	1077	1842	1472
KAI36_01257	602.96	647.092	843.277	586	778.391	682.305
KAI36_01258	278.04	282.908	440.05	214	326.609	345.848
KAI36_01259	538.558	628.403	828.108	514.222	726.689	597.771
KAI36_01260	94.442	119.597	155.565	124.778	149.311	141.602
KAI36_01261	144	167	172	114	169	168
KAI36_01262	2862.7	3527.01	2848.82	1622.34	2471.24	2407.76
KAI36_01263	34575.9	42526.3	34166.4	21182.7	35222.9	26825.3
KAI36_01264	5	8	17	5	12	13
KAI36_01265	7	14	21	10	12	10
KAI36_01266	15	22	29	10	12	13
KAI36_01267	0	0	0	0	0	0
KAI36_01268	0	0	0	0	0	0
KAI36_01269	705.028	620.443	850	707	957	877
KAI36_01270	135	184	254	174	259	161
KAI36_01271	422	401	608	365.97	623.005	534.987
KAI36_01272	1	3	3.774	1.981	3	3.013
KAI36_01273	4	0	3.226	1.019	2	0
KAI36_01274	0	0	0	0	0	0
KAI36_01275	227	258.629	366	296	311	279
KAI36_01276	17	20	17	24	4	16
KAI36_01277	684	630	881	548.006	730	763
KAI36_01278	19.051	14	22	9	21.003	15.997
KAI36_01279	51.949	65	70	51	67.997	61.003
KAI36_01280	59	64	92	58	53	55
KAI36_01281	65	65	87	66	113	88
KAI36_01282	53	44	78	40	54	81
KAI36_01283	11	6	14	10	19	10
KAI36_01284	113	143	168	108	178	120
KAI36_01285	139	157	201	121	176	136
KAI36_01286	70	78	83	64	113	63
KAI36_01287	40	39	93	56	49	57
KAI36_01288	13	8	15.554	9	4	12
KAI36_01289	3	7	12.446	2	13	8
KAI36_01290	68	96	83	41	78	69
KAI36_01291	16	38	72.132	64.968	23.344	42
KAI36_01292	424.649	693.45	1383.8	1000.75	512.536	678.193
KAI36_01293	498.351	923.55	1878.07	1488.28	661.121	887.781
KAI36_01294	850.887	1015.9	1034.24	637.179	751.896	766.011
KAI36_01295	324.113	340.102	369.759	179.821	282.104	246.989
KAI36_01296	188	253	255	135	186.753	222
KAI36_01297	976.248	1135	1264	765.997	1307	1087
KAI36_01298	431	538	491	668	1735	702
KAI36_01299	279	410	653	532	589	498
KAI36_01300	141.777	215.186	307.51	123	181.698	209.194
KAI36_01301	142.223	180.814	260.49	116	140.302	201.806
KAI36_01302	129.419	178.069	260.525	115	129	157.897
KAI36_01303	105.581	153.931	196.475	93	125	143.103
KAI36_01304	54.264	50	49	51	60.311	46
KAI36_01305	24.736	16	23	46	64.689	43
KAI36_01306	126	153	140	101	172	150
KAI36_01307	156.011	198	238	161	187	189
KAI36_01308	31	66	74	35	57	52
KAI36_01309	3	8	5	2	7	1
KAI36_01310	42853.6	61387.2	74703.8	34173	41152.8	47951.1
KAI36_01311	4537	6236	6273.13	2907	3659	4228.36
KAI36_01312	6776.95	8888.82	11340.5	5729.43	6536.73	7703.9
KAI36_01313	4799.98	6704.93	7923.76	3960.56	5261.58	5209.39
KAI36_01314	2975	3580.01	2991.01	1852	3234.1	2521
KAI36_01315	80	84	109	65	112	87
KAI36_01316	#N/A	#N/A	#N/A	#N/A	#N/A	#N/A
KAI36_01317	0	4	1	7	1	4
KAI36_01318	196	195	223	146	183	153
KAI36_01319	132	166	154	125	118	136
KAI36_01320	#N/A	#N/A	#N/A	#N/A	#N/A	#N/A
KAI36_01321	#N/A	#N/A	#N/A	#N/A	#N/A	#N/A
KAI36_01322	0	0	0	0	0	0
KAI36_01323	546	619	698.895	529	826.005	609
KAI36_01324	55	60	73.382	71	87	79
KAI36_01325	39	44	40.618	23	35	48
KAI36_01326	1	2	1	1	4	5
KAI36_01327	149	192	267	122	139	163
KAI36_01328	0	0	0	0	0	0
KAI36_01329	264	297	465.125	254.001	284	281
KAI36_01330	40	67	77	37	58	65
KAI36_01331	0	0	0	1	0	0
KAI36_01332	101.388	124.363	166.991	91	129.001	134.997
KAI36_01333	181.609	279.632	293.01	140	268.999	254.003
KAI36_01334	99.003	103.005	131	95	139	156
KAI36_01335	14702.9	15642.1	22367.6	16814.7	24486.1	18085.7
KAI36_01336	4629.93	5122.86	8412.39	5685.82	10345.3	6765.76
KAI36_01337	2182.61	1987.94	2688.85	1603.83	2597.04	2574.94
KAI36_01338	6647.82	5813.01	8320.57	5531.53	8419.64	7411.88
KAI36_01339	22695.8	20695.7	31719.5	20343.3	35528.8	27639.7
KAI36_01340	25057.4	22158.6	33341.1	20612.3	36175	30133.7
KAI36_01341	102795	92840.7	133991	84961.9	140464	120611
KAI36_01342	2201	2544	4559.06	3527.42	4360	3169
KAI36_01343	4467.51	5271.72	6128.23	3505.73	5581.7	4684.61
KAI36_01344	356.5	366.285	456.757	330.271	368.245	385.99
KAI36_01345	26	31	25	19	19	27
KAI36_01346	62	85	101	50	77	89
KAI36_01347	298	355.508	616.729	466.137	666.19	455.959
KAI36_01348	185.407	242.694	309.469	226.689	290.583	234.757
KAI36_01349	104.99	133.897	220.165	151.245	180.22	151.285
KAI36_01350	206.603	264.901	394.638	318.929	360.007	314.999
KAI36_01351	107	100.025	163.001	88	150.12	115
KAI36_01352	2756.98	5232.84	30844.5	15911	1464.88	8820.5
KAI36_01353	2	4	6.35	2	3	7
KAI36_01354	7	16	21.65	10	11	7
KAI36_01355	2	4	3	1	1	3
KAI36_01356	8	2	21	3	3	1
KAI36_01357	1	3	7	3	1	1
KAI36_01358	1	2	5	1	0	5
KAI36_01359	26.417	32	40	17	15	18.988
KAI36_01360	17.583	19	22	6	20	19.012
KAI36_01361	11	13.025	22	9	14	17
KAI36_01362	102	122.975	150	75	84	100
KAI36_01363	458	639.275	773	395.315	600	479
KAI36_01364	933.266	1132.04	1197.86	818.302	1142.99	1061.31
KAI36_01365	741.734	837.961	951.142	683.698	990.014	861.686
KAI36_01366	4697	5607.78	5832	3887	4871	4490
KAI36_01367	173	171	224	179	228	243
KAI36_01368	1844.01	1832	2365	1875	3188	2165.17
KAI36_01369	10511.8	10809.9	13660.2	10998.7	15947	13183.6
KAI36_01370	454.224	515.921	636.279	373.616	689.2	643.441
KAI36_01371	230.982	241.079	341.721	223.392	343.112	337.563
KAI36_01372	264	292	484	216	267	347
KAI36_01373	65	105	111	73	89.607	107.003
KAI36_01374	84	107	127	99	113	99
KAI36_01375	258	354	376	295	395	338
KAI36_01376	31	35	34	31	50	34
KAI36_01377	804	894.885	885.242	769	906	885
KAI36_01378	1540	1709.12	1924	1550	2572	1796
KAI36_01379	81.274	138.256	124.576	71.597	121.367	107
KAI36_01380	115.31	136.249	132.182	93.593	143.307	118.545
KAI36_01381	159.416	152.495	162.242	118.81	185.326	155.455
KAI36_01382	0	0	0	0	0	0
KAI36_01383	155.823	200.292	238.401	154.863	211.597	257.45
KAI36_01384	115.177	113.704	122.274	83.137	142.402	145.502
KAI36_01385	109	162.003	165.325	99	166.753	138.049
KAI36_01386	133	168.779	167.005	165.002	205.244	189.29
KAI36_01387	57	61.373	78.995	56.998	74.025	36.71
KAI36_01388	47.822	70.444	48.23	59.543	70.183	56.008
KAI36_01389	142.178	146.406	146.77	140.457	181.796	174.992
KAI36_01390	259	341	478	591	566	502.005
KAI36_01391	87	134	158	81	89	107
KAI36_01392	2354	2686.33	3176	2405.01	3807.04	2572.04
KAI36_01393	122	128	168	120	194	142
KAI36_01394	163	211	236	165	221	216
KAI36_01395	48	59	58	26	37	41
KAI36_01396	2815.17	2891.36	3869.72	2608.29	3676.87	3367.07
KAI36_01397	424.832	538.383	564.281	400.149	421.126	496.198
KAI36_01398	125	162	224	134	208	179
KAI36_01399	37	38.003	52.722	40.8	45	31.333
KAI36_01400	59	81.997	93.654	64.2	81	91.667
KAI36_01401	84	124	175.624	105	90	114
KAI36_01402	155	220	189.985	118.118	158	177
KAI36_01403	880.012	992	1100	634.883	904.002	802.001
KAI36_01404	21186.8	20758.9	31785.3	19727.8	29738.6	23925
KAI36_01405	1141	1507.01	2019.01	963	1429	1268.48
KAI36_01406	435	561.107	536	316	491	483
KAI36_01407	478	606	564	388	532	536
KAI36_01408	508	639	698.001	510.225	652.222	586
KAI36_01409	1119	1174	1607	1254.78	1616.78	1456
KAI36_01410	51	39	55	28	62	40
KAI36_01411	149.074	149.198	113.134	120.543	132.096	128.952
KAI36_01412	316.926	274.802	230.866	230.457	305.904	295.075
KAI36_01413	69	89	101.975	56	74	66
KAI36_01414	91	143	176.025	100	111	113
KAI36_01415	200	214	360	127	207	247
KAI36_01416	171.516	170.948	211.277	106.585	134.877	166.029
KAI36_01417	308.33	334.056	404.006	185.412	272.76	317.854
KAI36_01418	237.331	309.114	363.655	186.054	304.037	269.806
KAI36_01419	457.823	529.877	580.063	339.949	394.786	453.415
KAI36_01420	9	13	13	10	15	17
KAI36_01421	0	0	0	2	1	1
KAI36_01422	170	198.62	236.75	120	85	203.897
KAI36_01423	34	40.38	50.25	27	13	27.103
KAI36_01424	31	40	36.994	20	18	30
KAI36_01425	374	501	405.02	242	402	345.003
KAI36_01426	31	37	37.211	31	40	32
KAI36_01427	50	45	78.789	38	64	66
KAI36_01428	27	46	33.787	29	41	41
KAI36_01429	34	44	40.5	22	37	25
KAI36_01430	1088	1354	1663	922	1689	1217
KAI36_01431	931	1393	1433	755	958	1096
KAI36_01432	61	76.539	95.185	38.001	75.291	47.998
KAI36_01433	95	87.461	114.815	55.999	74.709	79.002
KAI36_01434	17	30	34	20	16	23
KAI36_01435	11.644	19	22.888	8	10.758	21.021
KAI36_01436	193.386	218.623	308.834	138.799	157.552	211.263
KAI36_01437	205.97	208.377	315.278	176.201	167.689	227.716
KAI36_01438	19.582	17.593	25.994	21.582	20.047	20.503
KAI36_01439	1098.15	1463.96	2472.98	1392.14	1610.35	1619.28
KAI36_01440	1778.82	2308.47	3689.36	2109.38	2397.61	2438.59
KAI36_01441	560.442	617	1049.86	577	684	686.616
KAI36_01442	79.338	102.638	125.603	77.001	100.399	95.902
KAI36_01443	165.662	169.417	300.397	168.999	194.601	190.098
KAI36_01444	81.271	98.063	109.309	79.833	136.867	106.171
KAI36_01445	271.729	270.937	347.691	196.167	269.133	243.829
KAI36_01446	37	32.998	50	21	32	24
KAI36_01447	19	33.839	48	16	28	30.905
KAI36_01448	22	32.163	22	18	25.312	20.172
KAI36_01449	5	8	16	15	12.688	12.923
KAI36_01450	61	57	75	71	92	85
KAI36_01451	25	47	57	37	30	40
KAI36_01452	83.689	90.043	154.899	79.934	88.01	114
KAI36_01453	245.311	207.031	288.101	214.082	322.99	323
KAI36_01454	10261	9246.81	13377	7983.85	14665.9	12033.7
KAI36_01455	9849.73	9100.7	13107	9162.88	15525.2	12389.9
KAI36_01456	892.834	921	1431	752	1142	1079
KAI36_01457	1456.9	1684.02	1979.34	1492.56	1982.26	1601.28
KAI36_01458	1129.1	1492.74	1660.83	1257.44	1593.75	1418.73
KAI36_01459	265.815	290.198	361.468	219.708	304.052	270.558
KAI36_01460	547.934	662.802	758.532	466.292	655.948	568.444
KAI36_01461	7473.96	7991.96	11197.4	8050.81	12492.2	8773.89
KAI36_01462	2477.92	2531.68	3531.56	1943.49	3022.68	2879.12
KAI36_01463	2081.63	2346.57	2753.38	1644.13	2271.18	2165.66
KAI36_01464	271.497	331.425	329.828	199.87	287.821	325.34
KAI36_01465	3038	3631.12	4301	2531	3582	3486
KAI36_01466	4217.57	5131.65	6145.51	4755.24	4732.22	4975.53
KAI36_01467	1884.83	2195.95	2784.38	2273.48	2360.55	2467.31
KAI36_01468	2156.75	2176.22	2752.99	3294.52	3366.92	2740.16
KAI36_01469	2978.36	3328	4478	5029.98	5393.13	5013.06
KAI36_01470	452.539	481.31	570.759	794.688	855.171	767.454
KAI36_01471	122.549	128.086	138.859	253.959	295.282	203.381
KAI36_01472	219.88	202.605	277.381	411.354	547.548	425.119
KAI36_01473	15	38	396	169	18	70
KAI36_01474	113	132	256	144	115	140
KAI36_01475	904.247	1082.55	1102.27	722.242	895.167	993.267
KAI36_01476	131.797	187.453	170.73	121.758	157.833	152.733
KAI36_01477	2248.01	2500.74	2388	2013.44	2303	2276
KAI36_01478	2069	2531	2586	1515	1955	1943
KAI36_01479	288	382	479.045	273	278	334
KAI36_01480	14783	17127.3	26931	22381.1	24109.1	18406.7
KAI36_01481	4514.06	5063.99	6635.02	3966.03	6179.11	4801.68
KAI36_01482	5113.64	5606	8137.01	3891.06	4794.99	5594.44
KAI36_01483	333	380	547	407.382	645	467
KAI36_01484	0	0	0	0	0	0
KAI36_01485	430	376	388	228	419	428.007
KAI36_01486	420	483	550	317.769	577	457
KAI36_01487	207	268.992	211.49	198.254	236.996	229
KAI36_01488	861	1040.2	935.51	785.746	1031	886
KAI36_01489	7936.3	7032	9745	5855.44	10272	8056.42
KAI36_01490	1281	1340	2123	1207.28	2106	1350
KAI36_01491	2047.57	2427.06	2813.51	1800.19	2532.52	2157.29
KAI36_01492	77.327	90.251	96.533	44.138	71.407	69.116
KAI36_01493	675.046	825.436	934.977	663.667	872.048	796.591
KAI36_01494	69.056	68.095	78	50	66.023	63
KAI36_01495	1033	1330.36	1137.72	466	941	887
KAI36_01496	1127.41	1116.04	1855.14	1069.39	2017.32	1422.03
KAI36_01497	2000.48	2038.96	3141.01	1907.62	3562.68	2256.6
KAI36_01498	1114.05	1137.87	1383.86	813.173	1054.6	1223.95
KAI36_01499	1911	1988.97	2450.32	1491.92	2054.53	2177.08
KAI36_01500	327.95	312.839	360.825	337.896	426.876	337.966
KAI36_01501	96	106	201.999	67.478	143.998	126
KAI36_01502	129.269	138.295	177.795	113.585	162.005	149.812
KAI36_01503	408.703	513.237	557.091	373.19	585.956	509.838
KAI36_01504	76.029	99.467	107.23	61.748	89.041	97.914
KAI36_01505	712	859.038	1011.88	670.041	968	853.436
KAI36_01506	171	230	302	297	230.004	297
KAI36_01507	25	29	37	21	28	34
KAI36_01508	828	1018.26	1714	1155	1336	1067
KAI36_01509	213	330.69	236	128	180	189.432
KAI36_01510	177.526	236.697	147.854	76.965	110.484	120.406
KAI36_01511	236.474	319.614	238.146	147.035	175.516	193.162
KAI36_01512	3928	4158.8	6132	3590.01	6691.44	4653.01
KAI36_01513	114	147.848	198	110	146	106
KAI36_01514	71.845	75.634	106.486	50.321	58	65
KAI36_01515	47.155	66.517	115.514	51.679	70	60
KAI36_01516	80	130	181	96	148	106
KAI36_01517	3573.34	5267.71	7263.66	3007.86	2902.1	4198.24
KAI36_01518	7317.77	9727.64	11345.2	5238.62	7316.1	8179.77
KAI36_01519	26231	28777.4	35810.9	20817	44733.1	26031.3
KAI36_01520	12090.1	15214.5	14757	8410.01	11282.4	11168
KAI36_01521	351.244	424.234	445.936	222.707	299.904	315.941
KAI36_01522	597.05	761.064	712.503	388.293	611.096	585.059
KAI36_01523	777.706	1042.9	995.57	626	903	834
KAI36_01524	87	81	111.131	85	101	82
KAI36_01525	1482.93	1402.31	2059	3579	3513.03	2813
KAI36_01526	2427	3138	3798	3354	2946.38	2866
KAI36_01527	57	62	71	45	85	71
KAI36_01528	518	681	755	1178	2271.71	842
KAI36_01529	271.138	316.394	367.322	192.526	325.176	333.792
KAI36_01530	248.862	240.457	298.678	179.474	323.824	276.208
KAI36_01531	245.586	352.978	474.693	282.206	395.998	385.963
KAI36_01532	558.414	638.022	932.306	574.794	656.012	631.037
KAI36_01533	79	118	121.001	82	113	92
KAI36_01534	29970.5	44152.7	58238.2	25446.6	26319.2	34665.3
KAI36_01535	396	545	572	296.043	426	400
KAI36_01536	52	40	53	22	58	56
KAI36_01537	776.946	887.9	1892.43	1042.64	850.155	1120.95
KAI36_01538	368.054	411.1	988.984	557.358	424.725	574.399
KAI36_01539	102	116	133	73	122	123.668
KAI36_01540	160	177.005	208	134	153.446	173.332
KAI36_01541	218.048	285.402	326.21	170.66	263.433	230.56
KAI36_01542	93.952	122.594	137.79	64.34	124.122	107.44
KAI36_01543	107.777	101	101	46	84	72
KAI36_01544	96.223	113.443	85	63	104	74
KAI36_01545	67	57.557	49	46	79	61
KAI36_01546	96	117	132	57	92	78
KAI36_01547	205.411	274.215	200.165	84	232.808	142.663
KAI36_01548	340.59	444.785	375.836	167	374.192	286.337
KAI36_01549	668.999	910.383	920.949	400.944	684	606
KAI36_01550	25	32	45.05	21.056	20	24
KAI36_01551	10845.2	15591.9	21293.6	9199.61	11582.7	12712.4
KAI36_01552	6622.8	9759.96	12149.2	5187.76	7159.19	7244.08
KAI36_01553	55	81.679	101	50.5	69.541	50.625
KAI36_01554	97	103.321	108	84.5	91.465	96.375
KAI36_01555	844.666	782.222	1150.41	866.776	1095.89	1036.12
KAI36_01556	779.762	624.977	1032.84	841.363	1080.43	865.36
KAI36_01557	513.575	480.336	756.756	594.93	770.679	639.523
KAI36_01558	1422	1244.46	1656	1187	1168	1507
KAI36_01559	73020.2	86549.3	103822	127165	86860.9	96311.8
KAI36_01560	3321.97	2718.63	3478.87	2679.94	2973.36	3124.69
KAI36_01561	1066.76	798.938	1102.14	770.573	894.971	958.52
KAI36_01562	2906.39	2341.7	3342.86	2239.01	2836.56	3084.73
KAI36_01563	4229.58	3450.43	4817.28	3650.9	4578.51	4260.56
KAI36_01564	77.468	113.102	130.834	85.193	89.203	81.531
KAI36_01565	107.532	120.898	152.166	63.807	82.797	108.469
KAI36_01566	23	30	46	21	22	25
KAI36_01567	17	20	29	8	15	21
KAI36_01568	2	7	8	4	1	2
KAI36_01569	56	63	70	66	82.001	69
KAI36_01570	362	358	449	342	579	410
KAI36_01571	123	153	183	121	144	173
KAI36_01572	767	837	1116.06	590	767	732
KAI36_01573	141	195	202	119	119	152
KAI36_01574	8.465	9	12	3	3	7
KAI36_01575	1229	1707	2158.14	975	1212	1480
KAI36_01576	49.134	72.508	136.299	91.975	83.395	105.213
KAI36_01577	42.058	68.514	110.596	71.025	50.608	86.188
KAI36_01578	60.395	89.973	163.968	113.612	108.057	90.235
KAI36_01579	129.414	155.005	306.138	187.388	194.94	235.426
KAI36_01580	80.343	116.449	189.706	64.186	74.892	124.783
KAI36_01581	69.657	81.777	200.726	79.814	54.467	103.217
KAI36_01582	68	82.774	190.711	80	75.641	87.232
KAI36_01583	14	19	28.879	11	15	15.768
KAI36_01584	982	1363	2516	1180	1187.7	1518.73
KAI36_01585	85	153.094	185.147	100.37	146	110.435
KAI36_01586	84	144.906	149.853	85.63	103	78.565
KAI36_01587	29	30	44	30	29	33
KAI36_01588	66.876	109.78	108.542	62.322	54.735	83.387
KAI36_01589	16.124	25.22	33.458	17.678	20.265	14.613
KAI36_01590	180	161	196	140	196	156
KAI36_01591	806.892	870.139	1427.76	1224.6	1282.53	1227.07
KAI36_01592	258.101	240	399.183	455.646	408.785	373.932
KAI36_01593	131.003	163.14	288.392	3400.28	1033.21	1459.57
KAI36_01594	93.997	77.86	191.591	2029.78	653.461	930.675
KAI36_01595	255	285	627.028	5235.59	1834.85	2354.85
KAI36_01596	338	392	709	6657.16	2070.49	2843
KAI36_01597	5	5	12	7	7	7
KAI36_01598	242	433.012	381	167	200	267
KAI36_01599	66	81	99	65	96	94
KAI36_01600	31	39	55.09	21	33	39
KAI36_01601	225	283	382.91	220	293	329
KAI36_01602	34336.5	37204.5	56058.9	28611.8	46828.5	35748.3
KAI36_01603	80.532	68.188	67.315	72.002	121	93
KAI36_01604	470.468	522.091	666.685	403.998	479	526
KAI36_01605	23	26	13	32	29	26
KAI36_01606	523.293	532.191	628.722	470.665	662.339	496.404
KAI36_01607	171.707	172.809	234.278	152.335	220.661	146.596
KAI36_01608	75	80	114	56	69	112
KAI36_01609	1511	1633	2028	1664	2416	1613
KAI36_01610	121	88	109	94.787	148	123
KAI36_01611	161	173	145	127.213	134	132
KAI36_01612	267.976	339.887	304	212	453.829	280
KAI36_01613	145.024	203.113	227	167	332.171	219
KAI36_01614	90	73.999	117	113	137	100
KAI36_01615	41	56.172	68	40	37	45.16
KAI36_01616	190	248.828	328	204	247.56	214.841
KAI36_01617	161.195	187	280.428	174.002	245.169	196
KAI36_01618	52.805	74	98.997	55.998	78.276	68
KAI36_01619	66	82	96.055	63	80	79
KAI36_01620	2	10	4	8	6	3
KAI36_01621	91	103	107	59	92	116
KAI36_01622	203	258	294	246.376	410	352
KAI36_01623	0	1	0	1	1	1
KAI36_01624	4	3	1	4	2	7
KAI36_01625	16	16	26	7	20	17
KAI36_01626	8	15	19	9	11	4
KAI36_01627	632.731	861.434	1074.88	495.999	555.62	751.721
KAI36_01628	50.005	67.604	69.811	43.382	63.397	55.016
KAI36_01629	1.42	1	3	4	2	6
KAI36_01630	159.802	168.225	257.391	137.267	229.544	189.254
KAI36_01631	83.093	77.502	83.63	51.996	112.791	63.757
KAI36_01632	31.105	37.273	41.997	22.738	30.665	33.989
KAI36_01633	101.999	86.557	124.006	108	134.847	105
KAI36_01634	24.001	15.443	21.306	13	31.153	17
KAI36_01635	4	1	3.688	1	3	1
KAI36_01636	81695	75572.7	105691	80772.8	118442	98606.6
KAI36_01637	1364.68	1603.96	2077.32	1336.66	1491.72	1704.02
KAI36_01638	375.256	432.974	535.634	375.935	464.384	412.514
KAI36_01639	903.071	996.947	1438.31	908.47	1166.26	1262.37
KAI36_01640	141	222.005	276	154	227	205
KAI36_01641	68	68	78	58	86	90
KAI36_01642	177	238	257	224	343	218
KAI36_01643	3194.87	3367.82	4794.99	2595	3578.77	3732.99
KAI36_01644	15	3	10	7	9	8
KAI36_01645	18	18	35	17	15	26
KAI36_01646	185.283	176.963	157.305	92.62	162.984	123.298
KAI36_01647	26	28	29	23	40	29
KAI36_01648	75.58	124	423	206	70	154
KAI36_01649	91	107	116.004	68.001	115.559	92.773
KAI36_01650	42	44	63.996	33	46.441	41.227
KAI36_01651	12179.8	11803.2	16120.4	11652.4	13881.1	8957.33
KAI36_01652	1363.49	1585.71	1935.35	1215.69	1820	1482.55
KAI36_01653	5423.78	6169.78	8269.88	5436.32	8427.29	6097.05
KAI36_01654	3910.89	4559.63	6246.58	3931.83	6593.24	4407.51
KAI36_01655	982.614	1205.46	1635.66	967.598	1666.99	1320.55
KAI36_01656	13321.3	14201.2	20866.8	14083.9	23562.2	15241.5
KAI36_01657	5486.96	8444.55	22098.5	11344.4	3024	10165.3
KAI36_01658	350	368	426	399	628	536
KAI36_01659	209	283	364.657	247	217.992	268.464
KAI36_01660	306	406.001	591.116	326	330.008	354.729
KAI36_01661	858.001	1064.44	1364.75	875	1065.38	1005.16
KAI36_01662	603	731.558	985.485	569	728.625	743.359
KAI36_01663	2749.6	4134.86	5840.85	2335.93	2624.61	3544.32
KAI36_01664	7441.35	11232.7	15213.2	6451.41	7295.2	9361.13
KAI36_01665	3004.08	4474.17	6126.57	2550.31	2479.13	3993.58
KAI36_01666	1	0	1	0	1	1
KAI36_01667	1168	1450	2183	1300	2048	1362
KAI36_01668	13976.6	19905.3	28467.6	12525.4	13333.8	17621.2
KAI36_01669	2974.58	4332.52	6398.95	2953.6	2959.53	3800.3
KAI36_01670	856.068	1090.7	1200.23	598.516	656	940.253
KAI36_01671	462.92	655.728	1582.85	809.689	468.132	884.197
KAI36_01672	158.994	210.592	499.858	264.5	186.802	260.836
KAI36_01673	413.331	527.267	1499.11	734.695	450.339	800.795
KAI36_01674	283.757	340.413	999.623	483.095	232.471	534.514
KAI36_01675	172.348	201.037	827.703	389.793	178.071	352.264
KAI36_01676	263.652	403.963	1171.85	601.227	227.185	622.545
KAI36_01677	324.354	392.254	402.752	262.27	292.166	313.099
KAI36_01678	2407.65	3065.59	3674.24	2174.73	2052.83	2743.93
KAI36_01679	423	541	565	335	477	385
KAI36_01680	1250.4	1898.08	2530.33	1170.08	1030.55	1502.17
KAI36_01681	774.587	1221.99	1667.67	818.921	621.459	1164.83
KAI36_01682	567	697.94	865.925	653	918	697
KAI36_01683	516	621.06	750.079	396	461	591
KAI36_01684	139.184	166.053	200.214	112	126.937	150
KAI36_01685	1473.32	1681.28	1713.81	1044.02	1380.04	1402.9
KAI36_01686	2133.77	2171	3035.25	1759.15	2486.31	2386.8
KAI36_01687	9964.73	9980.12	12964.5	10035.2	14073.2	11395.1
KAI36_01688	198	278	289	177	243	198.181
KAI36_01689	73	122	163	92	169	104
KAI36_01690	18	21.429	36.995	26.997	38	34.539
KAI36_01691	41	31.106	42.651	30.003	40.771	28.461
KAI36_01692	72	105.465	153.354	80	149.229	71
KAI36_01693	16286.2	14540.9	23152.8	12408.6	17075.9	17711.7
KAI36_01694	210.766	268.713	328.558	196.769	314.626	275.886
KAI36_01695	122.234	149.287	166.442	97.266	149.374	168.114
KAI36_01696	988	1448	1939.03	1025	882	1215
KAI36_01697	10492.4	10149.1	15252.7	10367	20027.4	13480.1
KAI36_01698	7232.66	7448.17	10135.6	8789.5	14698.9	10559.2
KAI36_01699	5221.11	4902.94	6699.67	6838.62	12021.9	7817.88
KAI36_01700	206	185	246	272	366	275
KAI36_01701	1099.01	1057	1591.09	885	1353	1037
KAI36_01702	152	149	145	108	173.117	171
KAI36_01703	194.889	249.382	275	198	299.883	267
KAI36_01704	1.111	0	1	0	0	1
KAI36_01705	146	197	176	76	157	133
KAI36_01706	76	83	74.177	38.336	80.97	53.352
KAI36_01707	61	70	114.823	45.664	60.03	62.648
KAI36_01708	1725.21	2252.23	2435.84	1487.32	2324.69	2012.38
KAI36_01709	5006.32	6742.35	8056.88	4471.82	5108.01	6064.7
KAI36_01710	2276.59	3348.01	3918.4	1812.14	1821.77	2451.97
KAI36_01711	2178.61	2906.51	3119.82	1574.19	1736.28	2154.41
KAI36_01712	1736.48	2554.08	3073.73	1421.08	1264.98	1852.55
KAI36_01713	17617	16837.3	21945.2	16137.2	38672.1	17481
KAI36_01714	2408	3158	3692	2179.96	2078.99	2747.86
KAI36_01715	0	0	0	0	0	0
KAI36_01716	0	0	0	0	0	0
KAI36_01717	22.005	18	25	14	21.999	13
KAI36_01718	99.996	107	133	83.003	117.001	120.009
KAI36_01719	140.999	135	190	108	127	128.992
KAI36_01720	246	280	395	237	312	294
KAI36_01721	131.202	130.934	158.521	75.865	120	94.73
KAI36_01722	108.137	118.066	224.043	90.135	173.34	152.27
KAI36_01723	62.661	94	145.436	93	136.66	114
KAI36_01724	3	4	3	1	5	8
KAI36_01725	54.734	54	104.311	53.211	52	51.001
KAI36_01726	19.886	16	25.689	14.789	10	22.999
KAI36_01727	24.381	39	45	18	30	29
KAI36_01728	119	127	126	86	120	119
KAI36_01729	147	174	210.983	125	183	160
KAI36_01730	30	33.102	42	38	49	40
KAI36_01731	289	348.898	418	217	368	309
KAI36_01732	24	38	23	19	23	24
KAI36_01733	39	46	51	37	53	37
KAI36_01734	109	120	140	61	106	91
KAI36_01735	27	42	58	25	43	43
KAI36_01736	83	78	161	98	153	128
KAI36_01737	230.631	362.864	514.024	488.87	288.631	316.365
KAI36_01738	552.414	754.551	974.842	772.398	652.369	662.259
KAI36_01739	1507.96	2063.59	2977.13	2584.73	2652	2126.38
KAI36_01740	104	123	127	97	84	107
KAI36_01741	11	23	14.867	9.349	10.84	10.327
KAI36_01742	11	9	26.133	9.651	8.16	20.673
KAI36_01743	17	37	48	24	53	29
KAI36_01744	15	18	26	19	45	27
KAI36_01745	77	109	132	77	104	93
KAI36_01746	113	138	175	125	165	110
KAI36_01747	530	580	552.995	410	613	479
KAI36_01748	4	3	4	3	2	3
KAI36_01749	413	466	737	462	597	443
KAI36_01750	37	53	45	61	51	57
KAI36_01751	41	33	57.54	35	53	46
KAI36_01752	107	133	164.46	101	126	128
KAI36_01753	15	18	26	9	20	23
KAI36_01754	3	7	7	4	1	4
KAI36_01755	3	9	22	18	3	9
KAI36_01756	110	130.008	144	105	160	124
KAI36_01757	85	107	87	101	86	77
KAI36_01758	6	15	29	6	12	12
KAI36_01759	105	152	103	86	118	132
KAI36_01760	202	203.155	277.001	189	254.169	228
KAI36_01761	5441.27	6476.86	8759.91	5623	7975.24	5949.09
KAI36_01762	17	27	23	12	23	28
KAI36_01763	2284.03	2775.55	2544.25	2208.76	2358.89	2384.36
KAI36_01764	1988.96	2277.45	2369.3	2236.24	2767.11	2500.31
KAI36_01765	1738	1350	1734	1585.28	2299	1956.01
KAI36_01766	93.851	104.551	110.678	74	73.287	84.991
KAI36_01767	41.149	50.449	54.322	35	45.713	45.009
KAI36_01768	56	69	62	48	76	68
KAI36_01769	0	0	0	0	0	0
KAI36_01770	80	78	122.21	59	72	72
KAI36_01771	76	84	111.757	53	61.998	85.454
KAI36_01772	1762.09	1783	2193.24	1598	2016	2085.55
KAI36_01773	105	151	134.075	114	149	143
KAI36_01774	881.628	894.77	1318.22	838.249	1475.61	978.297
KAI36_01775	746.393	799.23	1338.24	681.751	1228.39	989.703
KAI36_01776	15.996	29.001	34.618	17.332	25.926	36.326
KAI36_01777	413.004	431.999	698.382	447.668	692.074	536.674
KAI36_01778	7728	7302.13	9850.15	6874.99	9909.02	7913.74
KAI36_01779	42	36	34.073	31	56	38
KAI36_01780	5	1	12.927	5	7	5
KAI36_01781	52	80	120	61	73.057	61
KAI36_01782	33	40	39	31	55.001	36
KAI36_01783	91.414	113.499	160.992	86.001	113	101.993
KAI36_01784	483.585	627.501	968.008	438.721	552	555.704
KAI36_01785	120	177.428	272.351	92	126.541	132
KAI36_01786	108	162.529	201.65	109.063	113.459	119
KAI36_01787	707	784.411	1065	742.937	1160.2	823
KAI36_01788	268	322.632	405	273	526	340
KAI36_01789	158	164	180.975	160	261	194
KAI36_01790	46	50	53	56	71	72
KAI36_01791	3588.03	3279.11	3889.99	3055	6017.62	4355
KAI36_01792	8	10	96	31.014	7	37
KAI36_01793	90.871	112.553	138.927	93.697	164.719	97.127
KAI36_01794	134.734	134.845	170.803	138.344	166.247	171.657
KAI36_01795	238.629	281.583	374.903	249.357	424.711	356.159
KAI36_01796	229.767	219.02	313.531	270.603	443.323	305.338
KAI36_01797	342	404	609	366	377	435
KAI36_01798	292	417.065	628.038	309	346	387.037
KAI36_01799	133	164.935	193.962	103	177	142.963
KAI36_01800	524.721	627.854	757.32	394.658	619.884	521.758
KAI36_01801	463.567	547.101	670.858	364.907	526.255	451.941
KAI36_01802	1982.71	1951.12	2094.82	1816.42	3560.86	1695.3
KAI36_01803	1170	1355	1676	1083	1499	1339.87
KAI36_01804	1150.02	1560	1406	754	1094	1065
KAI36_01805	147	181	185	159	204	140
KAI36_01806	348	451	409	256	343	339
KAI36_01807	340.302	453.557	629.631	402.439	406.613	407.429
KAI36_01808	488.285	674.314	870.319	474.662	557.786	574.358
KAI36_01809	1349.41	1848.15	2369.05	1237.19	1566.6	1468.21
KAI36_01810	872	1066.49	1069.37	539.996	636.738	805
KAI36_01811	344.697	455.071	455.087	248.459	293.262	382.998
KAI36_01812	895.303	1051.44	1160.57	594.541	731	906.002
KAI36_01813	204	230.136	200.886	146.999	216	161
KAI36_01814	85	114.864	93.114	60.001	88	101
KAI36_01815	824	1028	1079	663	1071.09	892.612
KAI36_01816	245	248	317	182	237	221
KAI36_01817	45	65	89.276	52.195	78.203	67
KAI36_01818	328.067	420.822	450.353	351.465	485.474	456.065
KAI36_01819	72.933	88.178	98.371	106.341	125.323	85.935
KAI36_01820	7005.2	8219.33	10886.8	6541.45	9386.52	8769.4
KAI36_01821	343.994	494.411	476.983	292.795	404.363	419.071
KAI36_01822	278.807	342.375	382.121	268.758	401.897	344.946
KAI36_01823	628	665	1059.69	763	989	908.807
KAI36_01824	77	79	99	78	103	105
KAI36_01825	2765.1	3290.96	3727.85	2797.62	3749.79	3015.59
KAI36_01826	4651.13	4786.18	6538.76	4665.29	6533.75	5729.94
KAI36_01827	115.87	89.871	136.578	94.083	150.355	126.76
KAI36_01828	136	164.019	218	158	239	186
KAI36_01829	776	919.006	1132	636	865	946
KAI36_01830	1183	1468.98	1830.52	1197.89	1656.98	1280.98
KAI36_01831	591	919.017	1211.12	567.008	537.016	769.023
KAI36_01832	13220	14751.4	17715	12912.9	17594.4	15618.2
KAI36_01833	530	599	930.891	654	1100	791
KAI36_01834	389.136	412	591	473	795.01	510.483
KAI36_01835	1928	2116	2320	1755.12	2287.98	1939.83
KAI36_01836	758.074	797.99	974.289	781.303	1105.23	850.227
KAI36_01837	802.926	760.01	1038.71	837.697	1132.61	920.812
KAI36_01838	2113.04	2211.11	2621.59	1870.19	2671.58	2279.08
KAI36_01839	556.332	609.887	737.963	411.806	697.534	561.552
KAI36_01840	39	59	101.125	72	82	65
KAI36_01841	1515.32	2011.22	2544.64	1569.58	1345.9	1940.54
KAI36_01842	313.679	370.132	444.238	223.425	293.405	281.293
KAI36_01843	153	187	254	123	161	167
KAI36_01844	1582.94	1660	1842	1104	1721.04	1500
KAI36_01845	258	310	410	288	394	343
KAI36_01846	306	321.052	395	360	538	426
KAI36_01847	0	0	0	0	1	1
KAI36_01848	1424	2070	2661.91	1447.68	1662	1771
KAI36_01849	148	142	171	120	175	175
KAI36_01850	831.38	1129.83	1390.43	717	900.007	944
KAI36_01851	536.261	607.041	888.154	486.726	548.068	637.061
KAI36_01852	369.36	479.129	613.435	414.274	454.932	498.939
KAI36_01853	595	446	557	581.165	756.758	638
KAI36_01854	195.752	299	262.001	116	185.328	177
KAI36_01855	75.248	99	130.999	80	84.672	71
KAI36_01856	194	212	220	135	208	201
KAI36_01857	203	202.906	218	158.077	208	210
KAI36_01858	3559.01	5256.1	7081	3144.92	2971	4406
KAI36_01859	93	161	163	129.063	158.083	123
KAI36_01860	1146.03	1270.42	1661.38	1079.01	1485.33	1352.31
KAI36_01861	6876.33	8449.48	11349.1	8656.01	14133.7	8494.61
KAI36_01862	45.101	70.498	85.249	62	65	51
KAI36_01863	846.899	885.502	1280.75	653	1290	907
KAI36_01864	2012	2313	4155.72	2629	2845.45	2746
KAI36_01865	0	0	0	0	0	0
KAI36_01866	24	39	54	20	29	23
KAI36_01867	91	113.499	141	77.001	105.309	113.271
KAI36_01868	114	119.501	160	88.999	126.76	140.729
KAI36_01869	121	144	284	126	128	192
KAI36_01870	233	236	441	330	421	357
KAI36_01871	191	281	346	233	263	241
KAI36_01872	4542.97	5278.26	6770.95	3390.84	5511.54	5170.62
KAI36_01873	2852.45	3812.86	4599.18	2117.93	4045.55	3250.52
KAI36_01874	4565.59	6147.53	6822.99	3048.58	6073.81	4639.22
KAI36_01875	67	92	114	60	72	93.054
KAI36_01876	926	1111	1189	639	1101	1032
KAI36_01877	18	20	38	16	27	17
KAI36_01878	104	119	135	73	90	126.037
KAI36_01879	105	157	145	80	103	111
KAI36_01880	58	81	90	48	54	73
KAI36_01881	26	35	46.109	24.44	24	42.987
KAI36_01882	19.697	13	20.037	11.56	12	15.013
KAI36_01883	124.692	109.652	148.613	84.885	144.214	133.072
KAI36_01884	125.611	128.348	186.242	128.115	136.786	123.928
KAI36_01885	44	63	59	38	57	61
KAI36_01886	398.873	323.756	534.488	287.4	438.685	477.757
KAI36_01887	277.127	266.244	422.512	254.6	382.315	328.243
KAI36_01888	298	309	499.173	285	379	382.036
KAI36_01889	909.292	954.879	1641.86	1054	2636.93	1435.01
KAI36_01890	87.268	87.554	138.094	113.141	241.296	129.485
KAI36_01891	91.483	98.931	161.578	101.048	246.236	175.505
KAI36_01892	95.533	122.078	150.758	114.811	297.695	156
KAI36_01893	104	86.558	126.707	130	186	135
KAI36_01894	33	23	46	42	49	28
KAI36_01895	27	32	33	24	39	29
KAI36_01896	4692.79	4858	7417.04	3790.38	6360	5559
KAI36_01897	29.13	35.065	44.209	46.452	47.691	37.828
KAI36_01898	79.87	68.949	125.824	91.548	103.317	117.172
KAI36_01899	1261	1410.24	1821.97	1267.31	1711.86	1472.03
KAI36_01900	110	130	157	68	95	108
KAI36_01901	23	24	42	37	44	37
KAI36_01902	133	164	197	170.014	212	183
KAI36_01903	1152	1282.7	1958.96	1708.81	2089.38	1695
KAI36_01904	12	16.304	23.037	15.19	23.625	22
KAI36_01905	8	14	18	7	4	4
KAI36_01906	32	53.072	71	19	24	31.999
KAI36_01907	66	90.928	121	68	64	88.001
KAI36_01908	5789.87	5990.54	10881	4679	8484	7281.32
KAI36_01909	246	230	259	189	263	242
KAI36_01910	268	310	534	276	476	392
KAI36_01911	122	118	152	84	120	111
KAI36_01912	25	38	33	12	28	32
KAI36_01913	86	136	88	42	96	73
KAI36_01914	36	34	50	27	74	41
KAI36_01915	14	8.001	15	4	20	12
KAI36_01916	17	31.999	27.999	17	30.996	25.394
KAI36_01917	40	52.305	57.001	32.001	56.004	52.606
KAI36_01918	229	338.695	340	248.999	271	277
KAI36_01919	85.17	83.224	91.31	39.026	93.79	81.001
KAI36_01920	20.83	38.776	35.696	18.974	43.842	26.667
KAI36_01921	64	86	88.994	57	77.369	73.333
KAI36_01922	36	65	79	37	50	37
KAI36_01923	113	123	124	104	107	96
KAI36_01924	264	260	315.001	218	283	253
KAI36_01925	777	1010	929.08	491	792	698
KAI36_01926	1251	1702	1572	881.131	1387	1197
KAI36_01927	1	3	0	2	1	1
KAI36_01928	929	963	1359	739	1338	1046.02
KAI36_01929	74	116	125.344	85.184	89	93
KAI36_01930	245	264	386.656	334.816	402	371
KAI36_01931	33	40	60	35	67	42
KAI36_01932	39	43	63	47	53	54
KAI36_01933	185	269	336.015	221	331	250
KAI36_01934	520	748.001	1092	554	708	660.288
KAI36_01935	284	363	492.27	261	266	329
KAI36_01936	92	95	105.313	104	136.741	122.179
KAI36_01937	157	180	254.687	212	266.259	192.821
KAI36_01938	78	88.168	123.238	89.512	123.201	95
KAI36_01939	47	46.832	68.868	41.488	47.799	64
KAI36_01940	9410.72	9646.49	14011.5	11031.3	18795.9	11600
KAI36_01941	140.125	202.264	245.995	170.662	238.743	178.1
KAI36_01942	97.875	94.736	132.005	123.338	140.257	105.9
KAI36_01943	121	133	108.991	150	160	149
KAI36_01944	534	593	653.009	913	1222	888
KAI36_01945	382	442	609	997	1136	800
KAI36_01946	58.018	58	62	51	74.481	55
KAI36_01947	144.847	122.894	147.196	127.203	172.104	152.058
KAI36_01948	29.136	35.106	57.805	47.797	54.414	42.942
KAI36_01949	427	556	621	410	637	505
KAI36_01950	114	114.454	159.104	134	204.696	149
KAI36_01951	208.003	251.11	256.535	180.544	304.274	243.576
KAI36_01952	112.373	122.277	153.704	124.767	179.04	147.864
KAI36_01953	75.624	90.16	107.657	75.689	89.99	88.56
KAI36_01954	18	39	37	25	36	38
KAI36_01955	64	108	221	112	108	134
KAI36_01956	246.943	248.186	330.318	200.046	225.774	252.792
KAI36_01957	361.057	422.814	553.682	292.04	369.226	412.285
KAI36_01958	45	72	78	32	51	64
KAI36_01959	738	723.618	844.743	553	817.923	746
KAI36_01960	19	20	36.257	21	25.077	11
KAI36_01961	14	15	20	9	10	12
KAI36_01962	31	32	24	15	24	18
KAI36_01963	46	50	100	52	97	65
KAI36_01964	250	276	280	194.328	303	262
KAI36_01965	264	289	383	221	357	315
KAI36_01966	1	4	0	0	0	1
KAI36_01967	278.56	280.718	363.721	261.388	483.534	315
KAI36_01968	175.44	192.284	269.279	192.612	289.466	195
KAI36_01969	79	62	99	53	99.001	73
KAI36_01970	28.003	45.768	55.009	58.851	38	41
KAI36_01971	53.997	62.232	84.991	87.149	47	68
KAI36_01972	84	87	273	146	74	112
KAI36_01973	192	193.526	363.212	250	504	272
KAI36_01974	587	542.01	1005.79	550	1283.22	627
KAI36_01975	57	68	82	44	60	66
KAI36_01976	547	620	849.991	543	842	671
KAI36_01977	672	594.241	714	365	531	634
KAI36_01978	457.506	445.508	556.104	408.709	657.774	454.72
KAI36_01979	296.494	281.251	367.896	217.303	374.226	300.562
KAI36_01980	107	102	136	141	238	180
KAI36_01981	70.001	100	80	61.311	95.305	99.26
KAI36_01982	80.999	89.122	98	68.689	98.695	95.952
KAI36_01983	3390.36	4988.88	5533.16	2597	3262.03	3579.79
KAI36_01984	260	438.999	561	249	323	376
KAI36_01985	243	346.001	273	123	170	229
KAI36_01986	3625.02	4474.99	4894.76	3580.26	4007	4105
KAI36_01987	81.008	87	96.398	88	112	102.931
KAI36_01988	451.432	580.229	556.281	361.144	532.818	542.385
KAI36_01989	1171.56	1315.04	1374.32	952.277	1197.61	1336.68
KAI36_01990	1325.9	1598.63	1446.98	1057.8	1450.24	1450.42
KAI36_01991	2063.55	2383.16	2708.9	1773.97	2735.15	2364.21
KAI36_01992	2020.22	1943.94	2481.92	2321.05	4332.81	3120.8
KAI36_01993	2620.84	3341.86	3424.12	2133.34	3261.45	2822.87
KAI36_01994	961.905	1082.91	1121.58	722.674	1150.39	1024.77
KAI36_01995	1612	1922.49	2104.36	1412	2056.02	1863.04
KAI36_01996	599.068	684.514	832.644	550.074	856.985	819.071
KAI36_01997	1674.98	2148.41	2944.72	1947.93	2849	2427.89
KAI36_01998	123.682	143.772	182.524	140.998	165.977	139.002
[truncated: 3,438 more rows]

## Sheet: S25
Supplementary Table S11b. Transcript quantification (raw reads count) results for samples used in the bacteria-pathogen interactions assay (strain S25)
gene_ID	S25_ctrl_1	S25_ctrl_2	S25_ctrl_3	S25_treated_1	S25_treated_2	S25_treated_3
KAI37_00001	1010	946	1224	1872.06	1803.12	2357.91
KAI37_00002	715.567	654.986	781.725	708.465	706.416	965.059
KAI37_00003	82.265	72.014	79.057	110.056	78.36	116.794
KAI37_00004	874.951	869.439	1269.63	541.651	529.469	689.423
KAI37_00005	220.824	210.025	310.52	101.058	119.965	121.629
KAI37_00006	5187.32	5115.52	5589.19	6462.14	7361.79	8434.19
KAI37_00007	33	35	32	10	20	28
KAI37_00008	2285.86	2171	2548	2920	3223	3527
KAI37_00009	954	946	1634	528.005	605	608
KAI37_00010	0	0	0	0	0	0
KAI37_00011	0	0	0	0	2.319	0
KAI37_00012	0	0	0	0	0	0
KAI37_00013	7948	8723.92	11998.8	1892.11	2923	5288.98
KAI37_00014	212	151	160	679	908	611
KAI37_00015	16	7	11	6	10	19
KAI37_00016	248	254	311	174	195	249.096
KAI37_00017	123	134	105	92	91	92
KAI37_00018	8151.98	7636.52	8547.53	3577.34	6395.1	16564.7
KAI37_00019	3305.54	3141.49	3513.85	2172.24	3915.75	11159.1
KAI37_00020	3791.69	3905.91	5053.4	2360.97	3288.02	6005.98
KAI37_00021	2633.57	2431.07	3355.2	1700.48	1843.6	3043
KAI37_00022	2001.21	1915.68	2333.91	780.553	878.405	1664.25
KAI37_00023	93.869	80.198	144.454	63.629	63.918	93.853
KAI37_00024	287.131	264.802	334.546	179.447	191.082	140.147
KAI37_00025	6382	6375.82	7255.39	26259.7	25390.9	27905.3
KAI37_00026	43.188	37.981	40	123.253	140.8	105.453
KAI37_00027	67.812	94.019	87	136.747	139.2	123.547
KAI37_00028	174	145	131	1046	809	726
KAI37_00029	52	40	34	45	46.814	46.454
KAI37_00030	54	60	49.458	95.083	86.083	98.052
KAI37_00031	127	104	115.542	218.917	234.103	194.494
KAI37_00032	37224.7	37952.9	45614.2	8751.54	10168.5	25882.1
KAI37_00033	68	71	83.023	64	23	27.007
KAI37_00034	320	336	397.255	186	193	200
KAI37_00035	701.12	654	675	341.09	405.129	407.085
KAI37_00036	549.88	404	362	267.91	262.871	251.916
KAI37_00037	3227.07	3391.02	3999.34	4443.64	4696.71	7448.92
KAI37_00038	3706.95	3381.99	4211.48	4665.36	4950.04	6751.43
KAI37_00039	6	7	7	17	29	17
KAI37_00040	367.657	378.131	472.994	265.028	280.03	286.894
KAI37_00041	86.343	60.791	89.079	58.972	48.97	62.057
KAI37_00042	1027.22	929.953	1129.88	1498.19	1517.48	1409.19
KAI37_00043	3117.78	3057.25	3761.43	2820.12	2608.52	2571.86
KAI37_00044	1630	1633	1745.62	1344.69	1362.01	1991
KAI37_00045	576.008	791	1019.01	201	193	209
KAI37_00046	832.996	780	888	414	430	500
KAI37_00047	4817.43	4032.93	3888.76	1467.92	1460.46	1706.97
KAI37_00048	4390.57	4016.9	3467.29	1326.08	1689.54	1335.03
KAI37_00049	5	11	2.003	1	4.998	7
KAI37_00050	231.503	248.806	303.842	135.394	160.44	193.319
KAI37_00051	946.811	887.194	1272.72	453.273	461.565	654.681
KAI37_00052	4197.7	4299.36	6474.47	2553.33	2732	3223
KAI37_00053	70	74	78	30	19	28
KAI37_00054	61	46	66	43.478	38	32.107
KAI37_00055	1428	1654	2513	329.522	405.427	517.898
KAI37_00056	1836.58	2036.98	3976.47	483.125	528.051	568.816
KAI37_00057	893.551	1048.02	1994.46	346.01	418.221	348.396
KAI37_00058	19790.7	18666.1	21438.2	22450.6	25327.7	28247.9
KAI37_00059	824.973	782.96	842.248	423.314	429.781	561.853
KAI37_00060	698.24	660.092	701.163	426.048	384.763	528.316
KAI37_00061	535.787	473.948	456.589	492.641	425.968	488.831
KAI37_00062	130.752	127.677	149.938	100.186	81.024	108.62
KAI37_00063	238.248	232.314	250.062	219.814	226.976	242.38
KAI37_00064	1077	1044.01	1294	955	1174	1514
KAI37_00065	320.354	348.305	434.163	222.379	187.661	221.709
KAI37_00066	1129.65	1057.69	1166.73	572.255	720.287	1044.81
KAI37_00067	369	358.993	381.28	280.304	300.56	406.335
KAI37_00068	302	325.007	382.826	209.062	210.492	372.146
KAI37_00069	38.786	38.857	49.396	35.354	37.557	49.033
KAI37_00070	241.383	221.914	257.147	152.369	157.813	180.946
KAI37_00071	63.831	70.229	88.457	49.276	42.172	65.02
KAI37_00072	661	624	815.002	429	575.458	577.001
KAI37_00073	866.998	750.011	905.998	987	1207	1009.08
KAI37_00074	618.917	565	588	1774.8	1744.95	1269.97
KAI37_00075	90.085	120	91	236.203	255.05	302.031
KAI37_00076	17	14	18	7	7	11
KAI37_00077	3	1	5	4	2	2
KAI37_00078	8	9	7	7	6	5
KAI37_00079	4	8	10	2	3	11.74
KAI37_00080	9	5	14	1	3	12.26
KAI37_00081	6.995	11	4.976	1.058	4	3.016
KAI37_00082	4.005	2	2.024	0.942	0	1.984
KAI37_00083	1808	1796	2359	373	414	539
KAI37_00084	16	21	33	32	21	39
KAI37_00085	0	0	0	0	0	0
KAI37_00086	0	0	0	0	22.031	0
KAI37_00087	#N/A	#N/A	#N/A	#N/A	#N/A	#N/A
KAI37_00088	2362	2079.22	2338.92	5342.42	6649	10933.7
KAI37_00089	2332	2443	3455.89	1259	1392.54	1061.2
KAI37_00090	2641.49	2474.98	2947.8	1470.9	1769.79	2417.35
KAI37_00091	1059.52	1065.93	1147.74	1084.17	1184.13	1566.18
KAI37_00092	4240	3915.66	4434.5	2867.84	3422.92	4196.27
KAI37_00093	5	8	2	3	1	1
KAI37_00094	3	2	4	6	0	4
KAI37_00095	4	1	4	1	1	4
KAI37_00096	42	41	54	38	53	67
KAI37_00097	5	1	1	1	0	0
KAI37_00098	0	0	3	0	1	0
KAI37_00099	0	2	3	4	1	1
KAI37_00100	4203	4007	4590.02	17652.5	19654.4	10494.2
KAI37_00101	248.653	224	266.675	248	282.001	316.976
KAI37_00102	150.347	161	264.002	98	82.999	163.024
KAI37_00103	360.002	380	497.268	279.311	307	313
KAI37_00104	343	362	507.658	163.689	165	226
KAI37_00105	6346.84	5709.52	6997.97	6390.91	7876.3	8123.5
KAI37_00106	3754.56	3585.51	4997.1	3012.38	3771.19	3267.26
KAI37_00107	26	27	25	38	21	28
KAI37_00108	72.001	88.001	83	50	56	51
KAI37_00109	70	68	75	32	20	33
KAI37_00110	106	99	85	1137	1496	372
KAI37_00111	7	10	2	5	4	5
KAI37_00112	16	6	22	6	7	9
KAI37_00113	881	922	1254	251.002	250	273
KAI37_00114	78	90	94	284	316.703	320
KAI37_00115	57	49	78	63	54.297	78
KAI37_00116	457	394.819	511	299	279	453
KAI37_00117	31	31	35	125	103	242
KAI37_00118	49	33.996	70.125	23	27	27.238
KAI37_00119	29	19.004	24.875	6	12	13.762
KAI37_00120	12	11	11	42	54	69
KAI37_00121	0	2	1	1	6	1
KAI37_00122	82	94	122	21	19	30.031
KAI37_00123	133	115	179	98	72	109.969
KAI37_00124	406	380	493	175	154	287
KAI37_00125	2895.81	2583.94	2952.59	1253	1373.05	1770
KAI37_00126	4	5	3	12	11	9
KAI37_00127	785.008	833.955	1032.91	214	272.981	274.403
KAI37_00128	153.992	169.045	198.087	82	85.019	78.597
KAI37_00129	32	26	31	12.055	24	11
KAI37_00130	179.987	178.79	231.572	109.207	102.54	98.346
KAI37_00131	1960.01	1903.21	2194.45	1880.74	1930.22	2150.65
KAI37_00132	6	6	7	7	9	6
KAI37_00133	3	5	6	1	1	1
KAI37_00134	3	3	8	1	2	6
KAI37_00135	42	58	69	20	11	18
KAI37_00136	31	34.997	55.119	13	14	16
KAI37_00137	34	39.003	43.881	14	12	11
KAI37_00138	9	13	16	5	7	8
KAI37_00139	2389.01	2265	2993	1724	2348	920
KAI37_00140	1136	1133.07	1479.02	1717	1630	1900
KAI37_00141	68	55	66	27	36	29
KAI37_00142	70111.1	62735	60762.4	87864.7	104191	81894.5
KAI37_00143	1414	1354	1605	1352.83	1377.01	1443.35
KAI37_00144	536.388	529.218	574.657	1347.37	1163.97	1108.35
KAI37_00145	453.612	444.782	499.344	1531.66	1418.03	1278.1
KAI37_00146	2735.78	3074	2832.2	1758.97	1266	945.207
KAI37_00147	6445.97	6918.91	9997.06	2029.79	2113.73	3001.4
KAI37_00148	7387.03	6667.9	7829.51	1629.1	1873.19	2517.86
KAI37_00149	9182.88	8399.9	9610.99	1805.12	2182.16	3566.05
KAI37_00150	8	18.999	18.006	3	3	5.012
KAI37_00151	5	7.001	9.994	0	0	0
KAI37_00152	#N/A	#N/A	#N/A	#N/A	#N/A	#N/A
KAI37_00153	#N/A	#N/A	#N/A	#N/A	#N/A	#N/A
KAI37_00154	0	0	2	0	0	0
KAI37_00155	1	3	0	0	0	0
KAI37_00156	0	0	0	0	0	0
KAI37_00157	2	2	0	6.907	1	0
KAI37_00158	0	0	5	0	2	0
KAI37_00159	10	0	6	0.667	1	0.333
KAI37_00160	1	7	3	2	1	0
KAI37_00161	5	14	8	4	9	1
KAI37_00162	0	3	0	0	0	0
KAI37_00163	63	99	52	46	37	18
KAI37_00164	0	0	0	0	0	0
KAI37_00165	23	25	24	82	84.007	58
KAI37_00166	25176.3	23389.8	31512.3	16228.5	22129.3	28594.8
KAI37_00167	997.997	918.373	885.548	786.463	946.397	880.339
KAI37_00168	987.284	893.889	892.312	1191.16	1212.99	1631.9
KAI37_00169	660.731	570.175	561.252	706.749	653.701	971.236
KAI37_00170	714.988	657.02	531.888	498.844	504.927	751.685
KAI37_00171	156	157	222	147	150	173
KAI37_00172	175	205.354	226	130.345	81	121.537
KAI37_00173	135	146.082	167.371	73.097	68.537	82.977
KAI37_00174	841.339	793.746	904.047	283.578	263.469	400.971
KAI37_00175	444.658	513.844	502.289	163.453	170.156	244.562
KAI37_00176	294.003	335.974	368.293	111.527	116.838	192.953
KAI37_00177	598.659	708.086	680.252	275.146	214.148	305.592
KAI37_00178	506.064	582.817	636.622	257.581	216.246	326.905
KAI37_00179	441.86	499.817	530.002	230.637	201.071	335.787
KAI37_00180	616.417	642.505	782.155	220.636	194.535	267.716
KAI37_00181	1490.11	1457.63	1615.15	1184.92	1231.39	1761.49
KAI37_00182	1972.89	1866.37	2098.85	1094.08	1304.56	1515.51
KAI37_00183	609.129	585.442	726	752.385	765.431	963.95
KAI37_00184	429.35	401.658	438.295	670.163	672.024	1033.84
KAI37_00185	788.533	761.937	757.561	1438.54	1226.73	1848.84
KAI37_00186	1524.18	1302.96	1188.52	1174.91	1122.81	1672.37
KAI37_00187	792	801	742.999	982	921	1258
KAI37_00188	739	664	865	207	276	420.002
KAI37_00189	82491.9	90704.5	123170	7573	8428.77	19860.3
KAI37_00190	6405.91	5612.26	5902	2410.95	2891.18	3775.52
KAI37_00191	0	0	0	0	0	0
KAI37_00192	34326.7	35207.4	45022.6	7797.64	7609.94	21001.8
KAI37_00193	112993	103195	100285	26260.5	29454.9	70260
KAI37_00194	33971.6	30133.2	29119.5	10833.5	11047.6	37329.9
KAI37_00195	15085	13022.7	13187.7	6904.71	7211.73	24363.5
KAI37_00196	48322.1	41623.5	40493.9	17066.1	18079.1	65338.2
KAI37_00197	130728	112379	96057.3	39176	43716.4	106861
KAI37_00198	913.999	996.009	1335.09	160	125	114
KAI37_00199	960	908	977	1200.02	1319	1161.09
KAI37_00200	312	362	533	481	752	906
KAI37_00201	273581	282691	234957	232603	285977	561758
KAI37_00202	13	16	15	33	12	22
KAI37_00203	424	417.453	550.656	191.201	178.191	299.853
KAI37_00204	65	70.547	88.359	45.799	83.809	58.147
KAI37_00205	23	20	18	8	14	7
KAI37_00206	0	0	0	0	0	0
KAI37_00207	9	5	1	22	38	39
KAI37_00208	31.201	30.681	42.373	37.304	50.074	40.217
KAI37_00209	30.634	14.768	23.943	19.343	13.245	21.635
KAI37_00210	46.165	57.551	70.685	32.354	46.681	23.148
KAI37_00211	0	3	1	0	1	1
KAI37_00212	40.997	29.243	48.566	202.265	206.266	142
KAI37_00213	127.003	140.757	126.434	454.735	495.735	396
KAI37_00214	0	0	0	4	6	4
KAI37_00215	8.732	4	11.998	6.722	7	5.016
KAI37_00216	32.268	22	36.002	35.278	40	51.984
KAI37_00217	5	8	9	4	6	14
KAI37_00218	158	171	193	40	42	69
KAI37_00219	9.664	7	10	2	1	1.171
KAI37_00220	69.336	59	71	22	25	26.829
KAI37_00221	49	42	64	56	51	73
KAI37_00222	8	2	8	19	17	34
KAI37_00223	27	15	13	80	113	95
KAI37_00224	25	27	34	47	33	47
KAI37_00225	2094.05	1936.25	2111	718	700	1055
KAI37_00226	74.478	106.564	123.79	75	90.717	50.461
KAI37_00227	60.522	71.055	76.704	70.219	84.862	61.047
KAI37_00228	81	121.382	129.506	287.378	317.021	323.492
KAI37_00229	504	409	399	385.394	419.4	388.103
KAI37_00230	887	849	770	232	274	358
KAI37_00231	89	66	65	484.43	406	496
KAI37_00232	14	13	9	105.57	113	88
KAI37_00233	172.245	147.353	250	137	167.57	227.746
KAI37_00234	88.581	73.647	60	110	147.43	197.254
KAI37_00235	236	273	385.007	271.014	214	422
KAI37_00236	58	58	95	40	49	55
KAI37_00237	20.872	38.805	32.638	17	29	16
KAI37_00238	27.128	17.195	31.362	45	27	21
KAI37_00239	449	496	552	366	449	679.003
KAI37_00240	69	74	121	26	33	22
KAI37_00241	201.145	188.956	195.06	3009.14	550.199	113.356
KAI37_00242	211.855	177.044	137.936	2315.74	463.936	135.465
KAI37_00243	511.154	490.464	406.004	10601.3	2149.86	527.609
KAI37_00244	2731.94	2153.31	1896.03	43218.3	8692.03	2007.89
KAI37_00245	1844.09	1513.14	1376.97	27374.9	6073.65	1562.68
KAI37_00246	479	413	343	310	303	430
KAI37_00247	37.999	26.235	42.999	30.245	32.61	86.517
KAI37_00248	240.001	194.765	190.001	184.755	213.39	556.827
KAI37_00249	8748.02	8617.71	9849.8	8733.48	9281.49	13024.8
KAI37_00250	2205.06	2265.75	2491.81	1872.64	1932.81	3183.07
KAI37_00251	1640.21	1616.77	1980.01	1290.3	1429.38	2194.59
KAI37_00252	8902.66	9054.87	11553.5	11276.5	12659.1	19515.4
KAI37_00253	911.641	781.411	739	668.643	715.808	889.845
KAI37_00254	563.359	516.619	631	539.357	605.192	727.155
KAI37_00255	317	285	296.048	1016.09	1560	1356
KAI37_00256	101	97	119	236.989	310.674	206.302
KAI37_00257	55	76	110	94.052	132.326	132.406
KAI37_00258	46	31	50	76	118	51
KAI37_00259	504	477	635.965	336	322	346
KAI37_00260	24	34	60	31	16	20
KAI37_00261	119.997	140	189	221	182	291
KAI37_00262	21	32	28	23	22	11.787
KAI37_00263	384	377.858	358	425.687	425.279	558.034
KAI37_00264	114	85.142	117	148.313	132.721	143.179
KAI37_00265	123	110	174	32	42	47
KAI37_00266	241.04	269.368	309.937	267.377	314.696	439.753
KAI37_00267	437.96	398.632	411.063	272.623	321.306	482.262
KAI37_00268	155.37	132.003	141.596	37.078	49	48.93
KAI37_00269	556.63	527.997	519.404	232.922	246	156.07
KAI37_00270	169	181	186	228	258	364.071
KAI37_00271	584.589	534.08	528.138	251.233	244.378	275.378
KAI37_00272	1289.41	1237.92	1266.85	349.767	347.622	394.622
KAI37_00273	130	134	207	44	42	56
KAI37_00274	878	850	990	157	154	221
KAI37_00275	803	785.001	915	1273	1252	1891.02
KAI37_00276	160	175	253	146	177	293.982
KAI37_00277	73	92	117	111	117	159.018
KAI37_00278	97	102	119	468	472	722
KAI37_00279	0	0	0	0	0	0
KAI37_00280	3848.6	3607.02	4020.54	2498.78	3220.76	2301.42
KAI37_00281	121.401	124	207.765	64.216	69.236	68
KAI37_00282	515	549	694	881	913	1167
KAI37_00283	16.999	14	18	44.16	34.444	36.509
KAI37_00284	42.683	25	29	34.331	22.556	30.491
KAI37_00285	196.314	201.702	249	156.637	103	162.491
KAI37_00286	255.373	261.691	256	162.871	117.076	188.363
KAI37_00287	59.631	40.607	42	28	19.924	31.146
KAI37_00288	7	2	4	1	4.645	3
KAI37_00289	28	40	35	6	6.355	7
KAI37_00290	5	7	15	2	6	3
KAI37_00291	175	215	282	127	167	119
KAI37_00292	0	4	2	4	1	1
KAI37_00293	1	1	1.411	2	2	7
KAI37_00294	8	3.026	8.589	4	5	3
KAI37_00295	4	3	6	8	12	18
KAI37_00296	67	65	86	36	32	23
KAI37_00297	16	9	21	18	14	14
KAI37_00298	77354.2	64159.5	59230.8	14348.1	17245.8	17823.9
KAI37_00299	4	15	5	7	8	11
KAI37_00300	54	64	88	15	9	32
KAI37_00301	205	236	294	87	92	105
KAI37_00302	124	113	173	118	124	133
KAI37_00303	999.187	896.1	835	708.384	749.992	1527.92
KAI37_00304	871.813	772.997	822	1013.66	1089.01	2085.45
KAI37_00305	51	57	68	65	88	74
KAI37_00306	1338	1188.99	1179	1264.01	1326	1402
KAI37_00307	21	15	26	29	39	60
KAI37_00308	5	4	2	5	5	9
KAI37_00309	1	0	0	0	0	0
KAI37_00310	1	1	3	5	4	3
KAI37_00311	5	11	9	5	3	12
KAI37_00312	1651.13	1499	1484.58	5669.68	6347.85	3011.24
KAI37_00313	1438	1160	1151	1882	1913	3206
KAI37_00314	1483.73	1515.88	1476.93	4880.66	3843.34	2512.12
KAI37_00315	400.293	359.282	490.102	520.305	489.384	244.881
KAI37_00316	6	11	17	6	7	11
KAI37_00317	261	276	464.167	77	83	99
KAI37_00318	6	14	12	15	17	17
KAI37_00319	2	3	4	1	1	3
KAI37_00320	10	10	15	20	11	10
KAI37_00321	33	43	59	43	42.693	42
KAI37_00322	53	70	64	43.278	57.679	75
KAI37_00323	36	28	48	33.722	35.628	40
KAI37_00324	1	0	0	0	0	0
KAI37_00325	189	223	214	257	269.36	206
KAI37_00326	147	137	179	151.003	157.64	136
KAI37_00327	451	381	477	180	174	314
KAI37_00328	2104	1791.73	1716.93	746.006	813.9	982.351
KAI37_00329	306	277.265	247.065	129.994	135.1	199.559
KAI37_00330	719.992	645.398	720.577	1128.47	1153.67	1688.27
KAI37_00331	510.395	474.423	462.712	714.256	857.975	1433.23
KAI37_00332	979.613	938.179	916.711	1113.27	1160.36	1860.5
KAI37_00333	4	1	8	1	1	7
KAI37_00334	23	9	23	9	9	22
KAI37_00335	6	2	1	13	8	16
KAI37_00336	17	27	42.003	7.406	14.064	20
KAI37_00337	14	8	33.997	10.594	13	8
KAI37_00338	1	0	0	1	0	2
KAI37_00339	27	20	17	22	19	23
KAI37_00340	0	0	3	2	1	6
KAI37_00341	13470.7	11465.9	11263.1	15719	17897	28953.5
KAI37_00342	145	101	123	127	106	232
KAI37_00343	60	61	60	57	59	103
KAI37_00344	114	125	132	125	113	207
KAI37_00345	1017	997	1214	497	532	837
KAI37_00346	11	8	10	3.2	3	6
KAI37_00347	8	0	1.999	2.8	0	2
KAI37_00348	6	2	11.001	9	3	10.85
KAI37_00349	15	20	17	24	21	13.15
KAI37_00350	42.24	35.353	48.002	26	26.189	31.346
KAI37_00351	434.76	422.647	496.998	348	292.811	422.654
KAI37_00352	179	162	188	407	449	580
KAI37_00353	2520	2601	3730	7886.22	9357.6	8503.82
KAI37_00354	105.099	91.604	106.181	356.061	316.852	265.015
KAI37_00355	45.901	34.396	59.819	49.939	49.148	58.985
KAI37_00356	5	8	7	1	2	4
KAI37_00357	8	11	8	6	3	5
KAI37_00358	772	775	1129.99	602	470	499.041
KAI37_00359	252.001	252	297.008	895.222	889.892	1332.81
KAI37_00360	48.706	29.04	43.556	252.41	206.224	363.751
KAI37_00361	34.051	24.96	34.444	162.101	205.626	275.001
KAI37_00362	126.242	124	89.001	404.349	368.258	653.523
KAI37_00363	80.515	76	51.587	214.824	203.977	327.933
KAI37_00364	59.485	51	50.414	163.11	140.037	217.811
KAI37_00365	38	37	39.999	119.064	106.986	159.175
KAI37_00366	29	32	34	75	71	92.427
KAI37_00367	67	49	65	174	144	213.573
KAI37_00368	0	0	0	0	0	0
KAI37_00369	0	0.001	0	0.008	0	0
KAI37_00370	#N/A	#N/A	#N/A	#N/A	#N/A	#N/A
KAI37_00371	0	0	0	0	1	0
KAI37_00372	0	1	3	0	1	1
KAI37_00373	2	2	0	1	1	0
KAI37_00374	5	8	0	2	0	0
KAI37_00375	0	2	6	1.093	2	1
KAI37_00376	0	1	0	0	0	0
KAI37_00377	0	0	0	0.667	1	0.333
KAI37_00378	0	0	0	0	0	0
KAI37_00379	#N/A	#N/A	#N/A	#N/A	#N/A	#N/A
KAI37_00380	#N/A	#N/A	#N/A	#N/A	#N/A	#N/A
KAI37_00381	#N/A	#N/A	#N/A	#N/A	#N/A	#N/A
KAI37_00382	#N/A	#N/A	#N/A	#N/A	#N/A	#N/A
KAI37_00383	3	5	3	2	4	0
KAI37_00384	10	14	9	3	2	0
KAI37_00385	0	0	0	0	0	0
KAI37_00386	3	2	5	0	0	0
KAI37_00387	2	2	2	0	1	2
KAI37_00388	0	0	0	0	0	0
KAI37_00389	0	1	3	2	0	0
KAI37_00390	1	0	2	0	0	0
KAI37_00391	0	1	0	0	0	0
KAI37_00392	650.656	745.214	895.234	1065.44	960.805	1236.91
KAI37_00393	604.344	675.741	1183.21	508.56	453.496	437.877
KAI37_00394	455.694	445.038	713.552	225	168.699	311.217
KAI37_00395	2513	2830.11	4033.09	1926.98	1531	2843.07
KAI37_00396	#N/A	#N/A	#N/A	#N/A	#N/A	#N/A
KAI37_00397	#N/A	#N/A	#N/A	#N/A	#N/A	#N/A
KAI37_00398	#N/A	#N/A	#N/A	#N/A	#N/A	#N/A
KAI37_00399	32	29	25	191	187	104.885
KAI37_00400	129	98	109	168	182	236
KAI37_00401	38.642	28.001	37.182	75.003	79.522	125.003
KAI37_00402	66.358	53.999	110.828	134.997	146.002	199.023
KAI37_00403	52.105	49	44.118	146.994	127.915	219.93
KAI37_00404	95.895	100	64.872	184.006	198.561	255.044
KAI37_00405	49	61	69	30	32	32
KAI37_00406	9	4	4	2	5	4
KAI37_00407	14	27	27	16.063	9	21
KAI37_00408	2	2	4	2.982	2	5.653
KAI37_00409	255	244	252	280.954	220	339.347
KAI37_00410	592	465	487.992	529	541.364	974
KAI37_00411	5215.36	4654.01	4964.01	17796.2	17868.4	14558.2
KAI37_00412	1677.63	1595	1402.35	1086.72	1043.91	1300.97
KAI37_00413	281.37	264	264.653	240.507	197.087	242.03
KAI37_00414	105	116	125	252	236	225
KAI37_00415	11.913	12.002	18	28.754	15	18
KAI37_00416	2.087	7.998	7	18.246	5.472	18
KAI37_00417	4	0	0	12	6.528	7
KAI37_00418	4	6	5	13.646	7.517	12
KAI37_00419	53	56	66	144.354	102.483	123
KAI37_00420	10	15	16	17	12	15
KAI37_00421	7	9.682	3	6	15	11.99
KAI37_00422	5	3.318	7	12	9	17.01
KAI37_00423	18	13	6	17	20	35
KAI37_00424	3	3	9	4	8	12
KAI37_00425	1104	1138	1447	676	753	480
KAI37_00426	9	5	11	3	1	4
KAI37_00427	16	29	48	12	15	29
KAI37_00428	15	13	23	23	27	35
KAI37_00429	485.731	527.248	581.236	453.223	467.448	538.535
KAI37_00430	181.269	169.752	192.764	147.777	141.552	300.465
KAI37_00431	409	385	411	53	47	72
KAI37_00432	9	22	19	5	3	10
KAI37_00433	400.002	354	390	417	454	463
KAI37_00434	541	420	447.952	1504.67	1202.94	667.834
KAI37_00435	266	235	210.048	772.6	543.06	576.166
KAI37_00436	190	132	205	227	190	239
KAI37_00437	3	4	2	5	4	5
KAI37_00438	165	153	183	114	176	669
KAI37_00439	109	121.017	113	165	140	154
KAI37_00440	1415.29	1572.88	2336.87	314.494	324.341	245.331
KAI37_00441	357.708	412.102	559.899	97.506	86.659	70.669
KAI37_00442	1649.29	1614	2024.56	616	502	647
KAI37_00443	3027.95	3154.96	4381.01	651	742	1292
KAI37_00444	11	20	22.999	35.739	29	37.876
KAI37_00445	28	51	40.001	39.261	44	46.124
KAI37_00446	37.205	33	46.222	44.994	30	51.853
KAI37_00447	93.795	83	136.778	140.006	90	105.147
KAI37_00448	86	73	114	305	205	282.016
KAI37_00449	194	179	243	122	121	46
KAI37_00450	5949	5602.13	7053	11073	10680	12243
KAI37_00451	855	746	1023	1190	1536	1837
KAI37_00452	15	9	12	10	17	16
KAI37_00453	15	13	10	15	20.526	30.661
KAI37_00454	17	16	8	7	10.474	12.339
KAI37_00455	332	311	270	745	418	473.003
KAI37_00456	13	2	13	13	9	9
KAI37_00457	307	291	422	142	154	205
KAI37_00458	10	4	5	0	0	0
KAI37_00459	12	7	7	21.252	12	11
KAI37_00460	16	7	9	20.748	10	21
KAI37_00461	8	3	16	8	9	3
KAI37_00462	492	473	520	606.035	741	1124
KAI37_00463	1032	1079	1364	1032	1340	1792
KAI37_00464	114	101	138	137.018	114	151
KAI37_00465	1358.95	1352	1865	803.982	986.949	1095
KAI37_00466	5	5	3	3	7	8
KAI37_00467	15	12	20	7	9	7
KAI37_00468	14	16	16	22	32	24
KAI37_00469	16.002	32	31	13	28	30
KAI37_00470	74.998	82	96	68.638	86	109
KAI37_00471	135.735	148.279	139.444	142.652	114.383	169.565
KAI37_00472	121.797	121.269	118.557	73.042	72.281	108.002
KAI37_00473	152.468	163.452	197.999	85.668	83.336	98.433
KAI37_00474	168	143	160	167	197	185
KAI37_00475	47	39	40	17	36	29
KAI37_00476	18	12	21	9	8	12
KAI37_00477	0	0	0	0	0	0
KAI37_00478	192.069	199.416	274	114	95.933	184.922
KAI37_00479	592.792	545	539.843	332.838	392.067	549.078
KAI37_00480	62.154	46	63.157	13.163	23	29
KAI37_00481	113	111	124	96	121	109
KAI37_00482	1619	1670	2460	857	1088	1590.17
KAI37_00483	689	631	818	340.993	360	592
KAI37_00484	36	27	28	108	148	161
KAI37_00485	2497	2803	3892.04	1289	1268	1674
KAI37_00486	1167	1253	1554	1073	1054	2331
KAI37_00487	0	0	0	0	0	0
KAI37_00488	13	8	12	15	10	9
KAI37_00489	132	136	206	567	444	605
KAI37_00490	30	32	26	42	55	49
KAI37_00491	373	318	398	272	367	436
KAI37_00492	274	212.038	219	533	464	530
KAI37_00493	66.269	69	82.789	57.491	75.418	74.607
KAI37_00494	1557.73	1492	1477.21	585.509	649.582	953.393
KAI37_00495	1	2	0	0	1	0
KAI37_00496	184	208.015	327	126	77	172
KAI37_00497	555	627	1005	822.221	553	327
KAI37_00498	520.111	374.646	378.393	1738.1	1928.44	1913.73
KAI37_00499	688.889	571.354	617.607	1448.92	1565.56	1822.7
KAI37_00500	35	29	24	63	86	114
KAI37_00501	0	1	0	3	1	1
KAI37_00502	29	44	55	61	77	70
KAI37_00503	3	3	1	5	5	1
KAI37_00504	8	2	4.37	10	9	9
KAI37_00505	8	10	5.63	7	6	6
KAI37_00506	18	11	33	8	8	7
KAI37_00507	36	52	56	52	43	58
KAI37_00508	0	0	0	0	0	0
KAI37_00509	22	21	20	198	208	83
KAI37_00510	42	23	26	173	267	169
KAI37_00511	48	41	36	414	393.37	359
KAI37_00512	25	36	32	201	206	101
KAI37_00513	1	3	6	3	3	1
KAI37_00514	140	106	114	110	115	277
KAI37_00515	11.948	6	13.793	6	10.767	20.698
KAI37_00516	12.052	16	17.207	14	19.233	40.302
KAI37_00517	3	5	3	9.435	9.502	9
KAI37_00518	0	2	6	4.565	5.498	4
KAI37_00519	33	38	61	30	33	45
KAI37_00520	184	226	330.999	19	25	27
KAI37_00521	789	727	838.001	331	349	649
KAI37_00522	1470	1418.93	1627	384	400	336
KAI37_00523	731.22	687.074	873.999	520	531	782.017
KAI37_00524	238	203	229	140	100	67
KAI37_00525	102	92	118	29	37.102	63
KAI37_00526	156.043	159	181	464	450	327
KAI37_00527	86.308	95.27	157.965	74.5	59	81
KAI37_00528	106.692	112.73	183.035	88.5	110	95
KAI37_00529	79.013	77.39	102.998	30	43	49.998
KAI37_00530	6.987	21.61	27.002	5	5	6.002
KAI37_00531	4612	3817.98	3329.72	1777	2212.23	2616.72
KAI37_00532	6	3	1	21	19	6
KAI37_00533	5	10	8	13	18	26
KAI37_00534	8	5	7	16	14	27
KAI37_00535	862	811	877	414	399	621
KAI37_00536	21	17	23	19.997	23	28.101
KAI37_00537	1208.73	1067.94	1086.95	1508.09	1478.29	2372.46
KAI37_00538	805.27	755.098	896.064	891.911	896.713	1348.44
KAI37_00539	69.95	64	83.185	133.998	125.28	194.692
KAI37_00540	115.05	92	109.081	157.005	172.345	264.308
KAI37_00541	470.019	359	371.734	712	615.375	831
KAI37_00542	23	30	29	6	4	11
KAI37_00543	32	38	50	27	16	17
KAI37_00544	510	523.008	626.993	372	355.264	356.003
KAI37_00545	225	225.992	259.007	133	148.736	164.001
KAI37_00546	680.003	664	684.934	353	384	373
KAI37_00547	48.506	64.002	116.07	27	34.58	35.993
KAI37_00548	42.494	38.935	61.931	23	24.295	36.822
KAI37_00549	168	183.063	278.999	225.973	166.125	147.185
KAI37_00550	77	86	130	91.027	103	92
KAI37_00551	3	2	6	10	6	4
KAI37_00552	33	40	46	59	69	50.9
KAI37_00553	73	111	132	93	100	130.1
KAI37_00554	83	61	72	34	34	22
KAI37_00555	239	198	179	160	148	152
KAI37_00556	2	6	10	20	16	22
KAI37_00557	7	1	1	10.535	7	7
KAI37_00558	10	17	8	29.465	26	30
KAI37_00559	4670	4040.1	3886.98	3890	4490	4388.01
KAI37_00560	1168	1021	1225	541	609	643
KAI37_00561	31	25.484	29	40	55.358	94.099
KAI37_00562	52	77.516	101.995	117.993	128.597	164.901
KAI37_00563	260	274	293.005	369.007	360.045	556
KAI37_00564	13	10	19	31	18	42
KAI37_00565	590	580	701	245	300	381
KAI37_00566	57	65	60.003	111	127	153
KAI37_00567	115.187	95.767	145.99	591.947	782.983	1058.95
KAI37_00568	47.813	35.233	49.01	303.072	371.05	338.046
KAI37_00569	951	956	961	1066	1012	1339
KAI37_00570	485.728	441	606	290	374	431.584
KAI37_00571	864.272	926	1045	349	314	380.416
KAI37_00572	255	260	379	133	126	127
KAI37_00573	8	12	7	16.994	21.732	10.002
KAI37_00574	210	194	204	225.006	223.268	195.998
KAI37_00575	856	856	1101	342	328	317
KAI37_00576	178.327	136.574	177.007	141.586	168.64	251.042
KAI37_00577	386.673	381.426	403.993	260.414	397.36	625.958
KAI37_00578	2	1	1	0	0	0
KAI37_00579	0	1	0	1	0	0
KAI37_00580	19	14.011	11	35.877	25.874	43.931
KAI37_00581	101	88.989	66	115.123	122.126	186.069
KAI37_00582	95	89	127	47	56	110
KAI37_00583	808	937	1544	613	698	1041.73
KAI37_00584	28	18	32	3	3	6
KAI37_00585	8	6	15	37	25	16
KAI37_00586	12	12	16	6	7	7
KAI37_00587	51	46	61	31	35	29
KAI37_00588	1	3	2	3	1	2
KAI37_00589	1	7	1	20	18	8
KAI37_00590	9	14	6	57.885	48.955	18
KAI37_00591	23	20	27	57.115	80.045	40.037
KAI37_00592	39.17	24	31	145.07	165.18	88.326
KAI37_00593	143.83	141	125.001	633.93	794.82	489.638
KAI37_00594	100	95.934	108	69	93.938	112.945
KAI37_00595	37	47.066	43	23	16.062	40.055
KAI37_00596	20	18	34	16	16	29
KAI37_00597	1	0	1	0	0	1
KAI37_00598	0	0	0	0	0	0
KAI37_00599	317	282	294	92	75	97
KAI37_00600	420.168	349	401.001	305	266	394.001
KAI37_00601	6	7.16	17.218	3.929	11	19.05
KAI37_00602	7	15.84	20.782	16.071	17	25.95
KAI37_00603	6	11	9	34	36	55
KAI37_00604	68	41	42	117	208	328.021
KAI37_00605	80	80	112.001	54	55.052	117
KAI37_00606	48	57	59	41	36	44
KAI37_00607	151	165.177	192	82.334	80.997	144.252
KAI37_00608	134	123.314	136.182	96.663	97.008	122.761
KAI37_00609	278	259.508	325.818	228.003	268.996	392.987
KAI37_00610	18	12	20	87	107	183
KAI37_00611	181.915	231	398	105	108.83	119
KAI37_00612	31	31	39	40	45.423	56
KAI37_00613	248	216	194	610	590.747	1129
KAI37_00614	17	14	19	19	20	16
KAI37_00615	40	34	73	25	37	46
KAI37_00616	52	37	42	74	82	103.001
KAI37_00617	5	5	7	8	11	10
KAI37_00618	4676.54	5053.07	7833.69	1455.93	1162	1433.61
KAI37_00619	4946.78	5349.37	7435.06	1533.38	1166.3	2365.39
KAI37_00620	2983.68	3155.44	4398.37	557.722	478.705	886.999
KAI37_00621	7.295	15	13	19.939	22	24.329
KAI37_00622	9.705	6	14	8.061	21	11.671
KAI37_00623	8	6	10	5	5	8
KAI37_00624	320	284.755	369.001	282	305	486.347
KAI37_00625	248	169.427	129.42	31	37	58
KAI37_00626	151	142.975	103.915	20.634	22	36
KAI37_00627	515	411.608	310.665	52.366	67	114
KAI37_00628	843.628	612.996	466.508	142	155.248	277.359
KAI37_00629	248.372	180.004	139.492	51	52.752	98.641
KAI37_00630	188.377	150.197	162.936	84	65	80.002
KAI37_00631	27.623	22.803	32.064	6	11	3.998
KAI37_00632	54	84	79	233	234	356
KAI37_00633	9332.15	8082.24	7511.37	37414.6	43485.8	79628.8
KAI37_00634	178	168	182.217	712.679	744.691	1662.11
KAI37_00635	13	10	9.043	10	2	8
KAI37_00636	5	4	7.489	4	2	4
KAI37_00637	13	11	12.511	21	27	51
KAI37_00638	42	39	38	30	28	37
KAI37_00639	428	381.001	461	77	69	68
KAI37_00640	54	56	88	43	39	38
KAI37_00641	1254.86	1244.99	1579.99	557.959	518.993	713.992
KAI37_00642	238.136	193.006	217.008	110.041	155.007	306.008
KAI37_00643	44	47	45	67.001	57	44
KAI37_00644	102	93	130	208.999	209.877	167.589
KAI37_00645	16.119	15.328	11	38.509	43.641	26.955
KAI37_00646	36.983	16.966	30.484	66.338	56.44	27.911
KAI37_00647	68.565	66.311	78.628	187.227	164.023	282.264
KAI37_00648	1717.33	1612.87	1908.95	1099.92	1214.02	1450.28
KAI37_00649	0	0	0	0	0	0
KAI37_00650	72	77	81	47	32	62
KAI37_00651	298	221	238	126	154	258
KAI37_00652	6	2	14	11	8	13
KAI37_00653	221	173	192	101	147.376	188
KAI37_00654	571.111	513.593	539.158	327.986	374.382	458.239
KAI37_00655	2368.91	2294.41	2213.86	1221.01	1308.24	1533.72
KAI37_00656	816	789	1010	629	608	869
KAI37_00657	407	380	444	343	336	480
KAI37_00658	1933	1806.77	2121	829	923.047	1112
KAI37_00659	188	169	151	109	147	230
KAI37_00660	148	153	155	169.352	160.484	194
KAI37_00661	194	131	151	123.686	115.516	176.811
KAI37_00662	2062.44	1480.1	894.522	8082.13	9850.99	37051.3
KAI37_00663	966.15	748.859	403.178	4190.48	4851.44	16787.3
KAI37_00664	1391.62	912.037	555.3	4199.36	4936.63	19447.1
KAI37_00665	0	1	0	1	1	3
KAI37_00666	48	37	43	82	83	297
KAI37_00667	55	68	69	37	37	53
KAI37_00668	69	60	96	39	48	75
KAI37_00669	221	224	385	111	148	200
KAI37_00670	10	4	3	0	0	1
KAI37_00671	22	17	31	20	20	34
KAI37_00672	0	0	0	1	0	0
KAI37_00673	0	0	0	0	0	1
KAI37_00674	30.002	24	23	6	6	4
KAI37_00675	82.998	80.991	100.286	39.086	57.19	51
KAI37_00676	23.476	42.59	47.131	29.689	16.81	11.271
KAI37_00677	446.524	416.419	454.583	223.225	255	332.729
KAI37_00678	28	23	15	29	33	53
KAI37_00679	5	4	4	3	12	12.107
KAI37_00680	12	12	14	8	7	16.893
KAI37_00681	18	26	42	24	19	50
KAI37_00682	167	137	137	147	155	146
KAI37_00683	3	5	0	0	3	0
KAI37_00684	8	17	21	4	9	3
KAI37_00685	19	19	21	35	40	24
KAI37_00686	25	21	20	29	29	36
KAI37_00687	8	12	22	5	5	9
KAI37_00688	16	17	19	9	22	10.204
KAI37_00689	220	194	253	63	82	91.796
KAI37_00690	989.991	884.073	1014.51	474.403	631.897	559.478
KAI37_00691	285.019	219.927	285.507	228.597	272.103	273.534
KAI37_00692	28	37	45	46	46	40
KAI37_00693	9	9	8	21	12.212	18.363
KAI37_00694	9	10	14	32	19.788	43.637
KAI37_00695	4	3	6	7	12	5
KAI37_00696	47	49	44	89	100	75
KAI37_00697	154	156	190	266	223	277
KAI37_00698	16	11	8	54	40	61
KAI37_00699	111	119	177	88	66	118
KAI37_00700	310	256	286	283	333	277
KAI37_00701	7	3	5	1	3	2
KAI37_00702	2	5	4	4	7	8
KAI37_00703	0	1	1	0	3	0
KAI37_00704	426.919	386.478	393.947	1294.21	620.763	1096.27
KAI37_00705	277.081	262.522	251.053	991.049	466.724	817.829
KAI37_00706	280.802	227	237.644	973.578	437.514	738.026
KAI37_00707	345.691	259.369	208.927	979.977	505.686	818.482
KAI37_00708	179.507	160.631	124.073	520.188	304.314	513.198
KAI37_00709	30	22	36	28	24	38.973
KAI37_00710	197	174	216	259	310	472.075
KAI37_00711	18	13	16	60	44	61
KAI37_00712	1831.55	1735.5	1838.44	2143.66	1753.71	2946.63
KAI37_00713	2015.45	1939.56	1836.77	2421.34	2248.3	1743.39
KAI37_00714	2679.99	2664	3916	1507	1400	2765.18
KAI37_00715	12	5.075	20	13.24	19	14.587
KAI37_00716	325.913	402.925	357	204.76	154	150.413
KAI37_00717	812.003	716	614	620	481	1632
KAI37_00718	240	231.043	341	218	188	269.018
KAI37_00719	679	507	547.002	291.006	369	311.054
KAI37_00720	86710.8	73185.1	59645.8	31615.4	33573.4	39717.7
KAI37_00721	926	1054	2032.05	841	819	1171.01
KAI37_00722	58	83	105	34	42	51.361
KAI37_00723	50	30	63	27	31	46.639
KAI37_00724	527.019	542	703.007	270.842	278.003	376
KAI37_00725	747.146	825.244	1260.06	210.277	201.644	249.434
KAI37_00726	3137.88	3012.76	4311.83	962.881	1058.35	1047.56
KAI37_00727	98	93	81	68	64	70
KAI37_00728	28	22	35	13	11	20
KAI37_00729	418	345	450	254	239	372
KAI37_00730	72	77	99	109	117	109
KAI37_00731	274	297	347	61	48	115
KAI37_00732	0	0	0	0	0	0
KAI37_00733	148	180	254	86	99	130
KAI37_00734	5813	5663.07	6332.95	34875	41265.8	50686.8
KAI37_00735	124	124.981	201.208	49.958	55	91.104
KAI37_00736	742	757.019	1019.79	756.042	790.274	895.896
KAI37_00737	63	48.013	62	124.015	109.459	154.003
KAI37_00738	334	295.987	351	411.985	420.267	615.997
KAI37_00739	568.357	496.352	583.818	497.598	517.736	679.747
KAI37_00740	169.643	168.648	195.182	178.402	134.344	153.253
KAI37_00741	265.297	238.681	233	1270.52	1114.03	1413.66
KAI37_00742	176.703	120.319	92	942.477	908.986	1127.34
KAI37_00743	12	8	11	63	62	77
KAI37_00744	350	272.01	220	5591.01	5673.52	8869.33
KAI37_00745	37.391	29.313	27.62	714.379	787.712	1647.14
KAI37_00746	40.609	42.687	34.38	625.817	733.771	1463.72
KAI37_00747	67	47	58	948.036	1088.93	2045.57
KAI37_00748	86	55	47	962.672	972.273	1791.7
KAI37_00749	28	30	23	223.292	208.801	303.546
KAI37_00750	54	36	62	44	58	96
KAI37_00751	922	945	1165	1270	944	1351
KAI37_00752	406.003	391	502	819	786	767
KAI37_00753	411.96	468.92	684.852	217.394	200.865	308.087
KAI37_00754	147.686	131.701	189.345	143.32	105.522	146.724
KAI37_00755	218.346	216.568	278.803	224.531	211.872	216.494
KAI37_00756	182.008	211.81	229	185.755	165.74	185.696
KAI37_00757	15	10	15	11	25.006	20
KAI37_00758	2	5.879	2	4	1.994	2.961
KAI37_00759	19	26.121	20	11	12	23.039
KAI37_00760	73	70	88	11	16	11
KAI37_00761	23	13	11	9	14	20
KAI37_00762	0	0	0	0	0	1
KAI37_00763	44	55	99	45	50	96
KAI37_00764	980	939	1135	1477	1587	1775
KAI37_00765	30	30	29	27	25	22
KAI37_00766	756	672	684	301	374	563.105
KAI37_00767	47.003	61	114	25	26	28
KAI37_00768	0.997	0	2	2	0	0
KAI37_00769	0	3	6	1	3	1
KAI37_00770	90	90.392	122.431	39	38	61.214
KAI37_00771	376.31	320.962	391.138	131.303	115.102	187.794
KAI37_00772	141.69	114.646	141.431	35.697	50.898	72.992
KAI37_00773	200	246	317	704.896	555	839
KAI37_00774	0	0	0	0	0	0
KAI37_00775	#N/A	#N/A	#N/A	#N/A	#N/A	#N/A
KAI37_00776	0	0	0	0	0	0
KAI37_00777	10475.9	9546.1	11303.8	89	117	644.11
KAI37_00778	59634.1	56893.4	62256.2	2705	2641	8995.03
KAI37_00779	185	189.077	188	5	12	35.999
KAI37_00780	30	31	47	80	90	81
KAI37_00781	455	524.15	635.655	208.564	241.118	292.518
KAI37_00782	1457.07	1437.85	1369.36	639.436	738.882	985.507
KAI37_00783	62.782	56.007	66	71.133	77.486	115.264
KAI37_00784	137.369	120.993	137.998	193.867	186.915	234.264
KAI37_00785	325.849	289.157	271.001	365.517	336.752	526.083
KAI37_00786	50	50.843	42	48.483	42.847	76.388
KAI37_00787	145.983	128.306	143.482	199.548	172.371	294.63
KAI37_00788	28.955	30.625	29.378	40.61	44.511	62.179
KAI37_00789	47.062	44.069	31.14	92.82	60.772	109.961
KAI37_00790	292	269.115	230.082	687.381	665.089	921.852
KAI37_00791	270	244.885	201.918	528.641	517.257	780.378
KAI37_00792	0	0	0	1	0	0
KAI37_00793	139	116.649	120	282.571	256.581	347.951
KAI37_00794	20	28.351	27	94.429	79.956	116.049
KAI37_00795	132	104	93	390	356.463	442
KAI37_00796	155	153	105	525	506	652
KAI37_00797	63	54	65	67	66	100
KAI37_00798	20	18	19	26	32	30
KAI37_00799	24	28	32	92	83.287	118.121
KAI37_00800	4	4	1	10	15.713	23.879
KAI37_00801	74	68	65	275	229	277
KAI37_00802	23	34	33	30	37	31
KAI37_00803	73	73	82	62	84.579	100.931
KAI37_00804	29.682	38	32	33.004	33.42	38.07
KAI37_00805	66.318	77	92	44.996	24.001	42.999
KAI37_00806	84	76	90	34	33	18
KAI37_00807	10	16	23	9	8	12
KAI37_00808	305.809	350.84	372.188	540.529	515.268	587.063
KAI37_00809	278.158	292.676	301.804	505.218	409.877	470.578
KAI37_00810	458.033	436.484	502.008	2053.25	2463.86	1255.36
KAI37_00811	37	23	31	66.999	75.676	64.79
KAI37_00812	88	78	94	167.001	175.324	164.21
KAI37_00813	716.125	569.71	557.004	769.374	736.405	856.885
KAI37_00814	19325.1	16910.9	14278.7	12905.6	12946.1	14653.2
KAI37_00815	149.224	202.265	227.983	190.839	173.539	284.756
KAI37_00816	132.776	150.735	253.017	159.161	141.461	217.244
KAI37_00817	141	129	151	47	59	70.556
KAI37_00818	61	58	63	31	38	22.677
KAI37_00819	525.123	498.821	420.264	3424.48	2943.48	5476.95
KAI37_00820	584.968	515.428	424.565	2970.01	2627.13	5121.99
KAI37_00821	592.909	480.751	440.171	2072.54	1847.39	4125.07
KAI37_00822	1232	1175.06	1418	1017	1119	1229.08
KAI37_00823	549	520	430	1594	1496.9	2017.12
KAI37_00824	32	35	36.859	60.001	50.024	79.449
KAI37_00825	30	51	36.141	96.999	102.467	105.551
KAI37_00826	51	53	75	124	128.533	111
KAI37_00827	125	100	143	78	69	92
KAI37_00828	3	3	2	1	1	4
KAI37_00829	30	36	50	24	20	30.008
KAI37_00830	5815	5818.01	7297.13	1332	1516	2348.99
KAI37_00831	401	413	506.125	118	106	211
KAI37_00832	1610	1314	1444	8563.18	7220	20001.3
KAI37_00833	40	25	52	78	67	87
KAI37_00834	637.317	628.508	752.702	1286.34	1490.03	913.129
KAI37_00835	781.678	822.492	954.298	1061.68	1007.71	841.871
KAI37_00836	136	110.745	115.304	485.12	443.459	393.185
KAI37_00837	105	95.255	96.696	336.678	340.541	273.831
KAI37_00838	12	14	5	22	30	17
KAI37_00839	1	1	0	2	1	1
KAI37_00840	212.788	183.281	301.876	297.469	383.067	588.107
KAI37_00841	462.212	430.719	607.128	432.387	557.933	743.425
KAI37_00842	212	233	282	115.144	132	167
KAI37_00843	972.007	1063.27	1220.34	421.825	369.47	442.872
KAI37_00844	52.993	71.73	55.659	25.175	25.53	39.128
KAI37_00845	77	68	83	89.066	90.136	128.307
KAI37_00846	46	35	58	79.934	94.864	79.693
KAI37_00847	12	8	12	42	21	29
KAI37_00848	7	3	3	7	4	5
KAI37_00849	53	35	95	80	96	95
KAI37_00850	101.536	101	92.518	132.895	139.488	130.151
KAI37_00851	662.464	598	657.482	1154.11	1290.51	2221.85
KAI37_00852	7	6	5	2	6	9
KAI37_00853	2	3	1	30	29	16
KAI37_00854	11	8.98	6	9.163	13	15.261
KAI37_00855	610	690.02	914	702.956	787	982.739
KAI37_00856	4	4	1	4	5	0
KAI37_00857	0	3	0	3	2	5
KAI37_00858	14	14	21	19	16.721	25
KAI37_00859	15	21	24	19.363	29.793	29
KAI37_00860	5	6	9	7.637	10.487	4
KAI37_00861	6	9	9	8	7	9
KAI37_00862	9	7	13	20	11	26
KAI37_00863	2	2	1	15	13	12
KAI37_00864	205.071	184	269	670	625	685
KAI37_00865	3	7	5	2	6	10
KAI37_00866	47	42.001	61	31	58	52
KAI37_00867	7230.56	7274.05	9340.27	8390.45	8396.3	12890.6
KAI37_00868	4326.89	3591.67	3469.04	209	221.042	259
KAI37_00869	77	73	107	33	32	29
KAI37_00870	16	11	16	273	218	43
KAI37_00871	270.152	274.392	326.744	126.651	125.27	125.709
KAI37_00872	69.848	85.608	105.256	36.349	42.73	56.291
KAI37_00873	418	367	374.094	655	752	4982.02
KAI37_00874	0	0	0	4.514	2	6
KAI37_00875	3.998	0	5	6.627	8	3
KAI37_00876	2.002	0	0	2.858	3	1
KAI37_00877	1080.9	950.13	1250.07	776.918	932.775	1579.91
KAI37_00878	1260.1	1186.87	1343.93	462.082	653.249	1220.27
KAI37_00879	17	26.385	26	26.2	21	29.687
KAI37_00880	48	35.615	44	121.8	100	70.313
KAI37_00881	1230	1185	1262	1317	1582	1696.58
KAI37_00882	299	292	318	129	118	198
KAI37_00883	4	8	5	11	5	10
KAI37_00884	579.002	718	1408	71	79	116
KAI37_00885	41	23	36	35	52	50
KAI37_00886	3	3	9	14	13	15
KAI37_00887	9	7	4	24	22	30
KAI37_00888	21	14	15	117	106	191
KAI37_00889	86	77	78	68	107	77
KAI37_00890	502	488	665	285	312	303
KAI37_00891	21	14	11	46	36	40
KAI37_00892	0	0	0	0	0	0
KAI37_00893	40	42	48	22	25	25
KAI37_00894	119	119	108	47	66	52
KAI37_00895	32.41	21	30	129	99.782	104.997
KAI37_00896	32.59	42	46	159	131.218	147.003
KAI37_00897	69	69	59	64	118	88
KAI37_00898	2615	2267	2457.02	1534	1526.99	2126
KAI37_00899	52	30.731	61	35.836	33.8	53
KAI37_00900	34	59.269	72	33.164	30.2	54
KAI37_00901	277	284	402.376	47	58	54
KAI37_00902	161.001	178.873	236.573	51	37.372	81.54
KAI37_00903	469.999	536.481	684.024	177.306	176.628	202.46
KAI37_00904	1806.2	1793.24	2261.79	730.146	828.661	1139.69
KAI37_00905	1723.81	1606.4	1969.19	567.548	690.383	1098.31
KAI37_00906	16	8.327	15	43	30.034	39.999
KAI37_00907	48	65.203	83.189	55.476	46.966	78.141
KAI37_00908	22	26.469	43.811	24.524	10	26.86
KAI37_00909	576.387	567.577	757.033	311.431	286.194	336.709
KAI37_00910	278.613	255.423	363.967	129.569	156.813	236.291
KAI37_00911	519	507.296	682	470	524.994	471
KAI37_00912	27	36.75	25.43	23	19	24
KAI37_00913	1227	1277.25	1463.58	725	885	1339
KAI37_00914	19	15	19	21	30	32
KAI37_00915	855	812	759	1875.77	2194	2966.11
KAI37_00916	18	9	13	14	19	16
KAI37_00917	79	83	102	28	47	101
KAI37_00918	133	103	97	195	221.633	401.168
KAI37_00919	390	361	365.269	746.502	913.367	1534.6
KAI37_00920	64	72	93.731	79.498	99	164.236
KAI37_00921	313.002	306	393.002	1203.93	1189.96	1109.94
KAI37_00922	255.996	223.173	283.662	1284.76	1247.32	1534.84
KAI37_00923	173.003	194.091	221.55	844.588	756.875	1031.99
KAI37_00924	325.939	323.014	319.109	1071	1011.03	1105.27
KAI37_00925	230.059	191.722	238.678	781.773	694.989	840.978
KAI37_00926	5	7	5	22	21	22
KAI37_00927	10	19	17	40	30	38
KAI37_00928	13	11	20	56	39.708	37
KAI37_00929	8	13	15	11	12.292	7
KAI37_00930	10.104	14	6	27.116	11	15
KAI37_00931	53.896	47	42	64.884	60	47.009
KAI37_00932	95	108	121	32	45	57
KAI37_00933	25	28	46	5	21	9
KAI37_00934	209	198	208	2863	2489	3132
KAI37_00935	4	0	1	5	1	3
KAI37_00936	35081.3	36435	40555.6	20405	18237.5	40014.4
KAI37_00937	17401.3	15887.5	13007.4	11343.9	11686.2	21342.2
KAI37_00938	248	208	177	597.152	706.002	556.999
KAI37_00939	232	208	238	358.848	451.998	316
KAI37_00940	229	244	273	130	135	188
KAI37_00941	48	25.506	20	114.255	148.524	155.13
KAI37_00942	165.739	141.793	138	568.86	656.812	744.045
KAI37_00943	330.737	288.516	215.289	1184.18	1314.29	1492.99
KAI37_00944	780.525	717.185	641.711	1892.42	2203.43	2517.66
KAI37_00945	749.38	718.039	651.796	1938.64	2293.08	3083.95
KAI37_00946	283.62	224.962	195.208	515.364	569.867	966.512
KAI37_00947	97.485	89.599	79	184.815	223.002	350.888
KAI37_00948	164.515	143.792	168	265.647	284.696	413.994
KAI37_00949	136.061	140.609	127	225.862	261.848	520.773
KAI37_00950	136.939	98.999	123.244	193.508	225.981	351.374
KAI37_00951	235	154.193	159.757	255.615	273.33	527.682
KAI37_00952	379.637	486.141	550.999	296.948	287.142	455.967
KAI37_00953	1572.36	1609.67	1812	1141.61	1244.81	1875.32
KAI37_00954	0	0	0	0	0	0
KAI37_00955	82	97	119	102	109	162
KAI37_00956	14.856	13.384	10.833	30.56	24.295	39.445
KAI37_00957	93.144	98.616	133.167	204.44	191.705	179.555
KAI37_00958	0	0	0	0	0	0
KAI37_00959	19	13	12	10	8.945	18
KAI37_00960	19	23	22	15	16.055	17
KAI37_00961	81	90	108	256.448	218.892	221.656
KAI37_00962	91.602	69.828	109.129	222.717	159.738	199.546
KAI37_00963	209.447	209.172	276.871	316.835	253.37	221.798
KAI37_00964	75.771	102.054	137.415	47.883	45.871	72.398
KAI37_00965	157.229	145.071	241.585	82.117	78.129	120.602
KAI37_00966	59	56	72	17	19	37
KAI37_00967	60	64	88	98	81	131
KAI37_00968	623	627	979.995	828.201	723.227	791
KAI37_00969	11	6.239	6	3	1	6
KAI37_00970	22	23.761	22	10	9	15
KAI37_00971	36	48	55	18	20.72	29
KAI37_00972	37	38.386	33	21.227	22.28	22.325
KAI37_00973	15	19.614	11	9.773	10	12.675
KAI37_00974	0	1	0	0	2	0
KAI37_00975	40	35	46	16	21	33
KAI37_00976	0	2	2	2	2	0
KAI37_00977	47	50	39	46	45	48
KAI37_00978	109	111	114	47	49	81.016
KAI37_00979	198	205	282	248	262	331
KAI37_00980	70	68	86	120	84	120.019
KAI37_00981	16	27	24	30	21	40.981
KAI37_00982	14	17	15	21	27	19
KAI37_00983	17	12	20	10	10	14
KAI37_00984	74	83	46	1201	1238	1953
KAI37_00985	255	270	334	218.011	264	330
KAI37_00986	117.511	115.685	114.346	49.676	58.281	104.355
KAI37_00987	125.901	143.613	148.847	61.765	74.349	116.07
KAI37_00988	467.78	425.101	531.19	174.31	236.708	366.456
KAI37_00989	424.13	411.554	472.617	129.712	179.218	264.578
KAI37_00990	904.677	879.046	943	298.537	317.444	486.541
KAI37_00991	19	20	16	6	11	6
KAI37_00992	10	24	19	7	7	1
KAI37_00993	28.99	21	47.61	16	9	22
KAI37_00994	60.01	63	79.39	24	20	31
KAI37_00995	53.379	82.805	89	23	22	35
KAI37_00996	61.789	49.195	83	20	16	23
KAI37_00997	11.832	7	8	4	6	5
KAI37_00998	15	23	23.995	6	8.998	10
KAI37_00999	53	56	63.005	31	23.002	39
KAI37_01000	261.466	275.383	295.311	279.086	277.348	316.252
KAI37_01001	573.534	533.617	634.691	619.914	597.652	732.748
KAI37_01002	574	540.001	673	136.833	110	161
KAI37_01003	781.253	819.188	957.669	87.126	81.192	188.864
KAI37_01004	544.853	639.812	742.332	126.041	149.808	199.136
KAI37_01005	475	461	595	124	116	237
KAI37_01006	286	247	295	231	208	441
KAI37_01007	711.419	720.498	898.116	509.789	458.704	757.74
KAI37_01008	483.068	458.904	698.341	393.184	331.287	432.67
KAI37_01009	554.119	486.598	735.543	265.027	213.009	319.59
KAI37_01010	321	288	348	262	418	449
KAI37_01011	331	305	326	407	468	735
KAI37_01012	111	126	139	308	275	562
KAI37_01013	578	594	604	317	304	426
KAI37_01014	379	355	382	610	588	744
KAI37_01015	77.873	67.847	146.774	65	63.869	76.87
KAI37_01016	84.127	79.153	106.226	81	94.131	56.227
KAI37_01017	382	382	458.001	826	819	1187.9
KAI37_01018	0	1	0	0	0	1
KAI37_01019	365	393	568.001	192	172	248.08
KAI37_01020	1118.05	1144.05	1413.62	852.468	769.087	1005.03
KAI37_01021	781.388	788.929	954.209	465.911	529.171	766.332
KAI37_01022	502.558	549.02	640.174	201.652	210.741	346.818
KAI37_01023	28	35	52	176	120	175
KAI37_01024	13	14	12	44	30	61
KAI37_01025	3051	2634	2809	24299.3	25013.5	28015.2
KAI37_01026	691	674	763	741.697	933	1502
KAI37_01027	529	501	725	267.303	294	411
KAI37_01028	358.532	343	459.877	322.006	302	434
KAI37_01029	174.468	178	220.123	268.994	218	340
KAI37_01030	380	404	429	2291	1794	1343
KAI37_01031	53	47	73	52	40	42
KAI37_01032	65	58	89	88	72	107
KAI37_01033	55	78	77	74	89	69
KAI37_01034	93	110	145	58	74	102
KAI37_01035	47	50	49	42	55	60
KAI37_01036	1385	1281	1314.03	2115	2157	2541
KAI37_01037	1	0	1	0	0	0
KAI37_01038	993.625	1052	1425	430	396	494
KAI37_01039	109	99	126	102	87	119
KAI37_01040	23	30	28	101	70	77
KAI37_01041	4	3	4	19	21	10
KAI37_01042	480	476	565	237	283	275
KAI37_01043	514	412	404.634	2120.14	2561.02	2499
KAI37_01044	634.062	617	565	2653	3362	2545
KAI37_01045	1022.72	871.98	929	543.996	777.195	587.984
KAI37_01046	5	12	9	5.004	14	23.029
KAI37_01047	6	13	22	14	14	28
KAI37_01048	59	45	59	163	194	192
KAI37_01049	491	450	562	459	407	600
KAI37_01050	6	6	9	15	16	12
KAI37_01051	1811.05	1502.21	1269.52	11939.8	11338.6	19490.6
KAI37_01052	535.948	493.794	474.48	4758.48	4636.6	8712.05
KAI37_01053	44	51	64	49	63	31
KAI37_01054	28	22	21	70.949	103	51
KAI37_01055	9	3	7	6.051	8	10
KAI37_01056	2	0	0	1	3	3
KAI37_01057	752.602	687.719	534.852	432.937	416.17	619.141
KAI37_01058	898.398	900.281	739.148	464.063	339.83	444.859
KAI37_01059	0	0	1	2	0	1
KAI37_01060	16	11	22	37	32	70
KAI37_01061	331.743	312.475	334.998	279.384	308.077	338.705
KAI37_01062	844.345	813.592	889.53	925.791	989.171	1091.49
KAI37_01063	1504.01	1400.93	1373.47	915.825	996.752	1486.81
KAI37_01064	1650.12	1490.64	1636	1061	1042	1680
KAI37_01065	19	15	32	4	5	6
KAI37_01066	4	0	1	7	16	12
KAI37_01067	15	10	18	43	61	34
KAI37_01068	106.588	117.163	97.611	824.937	880.691	816.013
KAI37_01069	51.642	49.119	49.524	752.342	735.224	872.484
KAI37_01070	683.772	544.718	510.408	4497.56	4530.36	4120.43
KAI37_01071	13.107	7.769	12.457	79.519	89.699	92.063
KAI37_01072	200.893	194.231	212.039	1945.96	1659.02	1089.99
KAI37_01073	114.379	111.489	100.452	532.428	615.285	396.461
KAI37_01074	71.246	52.36	48.43	306.455	291.896	156.566
KAI37_01075	274.033	223.38	185.695	1457.01	1677.58	1150.86
KAI37_01076	146.138	128.633	90.423	995.841	1055.41	703.786
KAI37_01077	54.204	38.137	38	351.27	409.803	158.986
KAI37_01078	149	118.474	134.95	847.5	809.342	677.446
KAI37_01079	457.274	373.315	250.677	2594.47	2694.21	2782.97
KAI37_01080	383.726	298.211	194.373	2055.11	2091.45	2685.46
KAI37_01081	91.097	70	97	51	49	72
KAI37_01082	16	12	38	8	20	11
KAI37_01083	12	10	13	12	17	11
KAI37_01084	93	82	179	24	17	38
KAI37_01085	214	151	142	333	324	398
KAI37_01086	170	116	146	850	782	633
KAI37_01087	23	29	35	20	16	22
KAI37_01088	57	79	69	95	105.369	156.362
KAI37_01089	262.557	194.311	236.422	238.226	327.614	471.562
KAI37_01090	195.443	188.689	166.578	197.774	184.016	262.076
KAI37_01091	62	58	57	215.932	312	340
KAI37_01092	47	30	46	32	32	63
KAI37_01093	189.389	168.374	196.514	92	114.872	180.066
KAI37_01094	60.628	53.878	70.839	17.85	27.546	78.803
KAI37_01095	186.982	216.748	320.621	88.15	80.583	106.131
KAI37_01096	274.798	269.568	522.66	160.197	206.087	325.578
KAI37_01097	158.202	208.432	335.34	78.803	81.913	166.395
KAI37_01098	0	1	3	3	2	3
KAI37_01099	5	5	16	19.619	10	9
KAI37_01100	13	25	23	33.381	35	26
KAI37_01101	844	929	1400	215	248	366
KAI37_01102	2223	1848.11	1785	32131	28219.5	20421.2
KAI37_01103	81.185	70.632	70	57.94	59.255	65.343
KAI37_01104	93.006	74.368	72	110.06	126.745	110.657
KAI37_01105	267	292	254	95	71	66
KAI37_01106	112946	114530	102588	81726.5	48236.2	34604.5
KAI37_01107	11464.4	10994.8	9995.21	7813.59	4431.49	2603.88
KAI37_01108	197556	197261	166567	133774	84176.1	65337.4
KAI37_01109	30492	29754.3	25045.9	19579.5	11290	8210.87
KAI37_01110	31119.6	30231.2	25457.3	22236.1	14490.4	12463.5
KAI37_01111	88687.3	85110.6	69992.6	59422	38558.7	34261.1
KAI37_01112	21894	20017.3	16729.8	14067.6	9298.3	8665.38
KAI37_01113	64105.5	61573.8	51407.5	43160.3	27455.1	21877.1
KAI37_01114	21653.1	20955.1	17342.9	14657.4	9553.35	8216.57
KAI37_01115	13661.4	13756	10824.2	10013.7	6310.05	4295.4
KAI37_01116	48081.1	47003.2	38948.9	36919.3	22848	17035.8
KAI37_01117	31509.7	30510.3	24747.1	21030.4	13923.7	10676.9
KAI37_01118	95306.4	90125.7	75041.4	63536.4	42602.2	36791
KAI37_01119	15170.3	14159.5	11528.3	10214.6	6932.25	5571.73
KAI37_01120	2546.35	2474.34	2127.88	1789.99	1169.56	1072.34
KAI37_01121	80.921	82.443	47.998	29	29	12.999
KAI37_01122	13519.2	12871.6	10221.7	8606.68	6061.52	5782.9
KAI37_01123	5535.77	5152.07	4199.24	3472.54	2294.05	1932.21
KAI37_01124	14524.3	13676.2	11683.5	10617.1	6889.14	4945.77
KAI37_01125	4055.87	3825.55	3110.01	2434.6	1666.53	1433.76
KAI37_01126	644.313	679.622	487.976	426.477	329.83	438.462
KAI37_01127	4260.4	3992.42	3492.41	2218.86	1447.48	1174.86
KAI37_01128	14891.9	14125.9	11240.5	6934.22	4524.45	3555.05
KAI37_01129	17.073	20	11	7.738	4.07	9.191
KAI37_01130	24	16	21	24	16	20
KAI37_01131	9	13	8	12.45	22	23
KAI37_01132	5	6	13.001	11.55	10	11
KAI37_01133	8	4	9.999	7	7	10
KAI37_01134	14	7	16.539	10	11	18
KAI37_01135	13	13	9.461	5	11	16
KAI37_01136	160	150.998	161.395	97	118.575	176.092
KAI37_01137	63	59.002	55.202	37	46.425	54.908
KAI37_01138	10	4	7.403	2	8	11
KAI37_01139	19	15	17	12	14	12.003
KAI37_01140	44	28	34	15	30	37
KAI37_01141	18	18	24	22	13	21
KAI37_01142	153.001	178	182	112	115	169.997
KAI37_01143	32	27	29	20	23	22.003
KAI37_01144	388	457	631.443	212	217	292
KAI37_01145	167	200	239.557	116	113	137
KAI37_01146	14	3	8	13	16	32
KAI37_01147	2	7	10	14	8	21
KAI37_01148	4	10	4	13	17	27
KAI37_01149	80	65	51	101	115	156
KAI37_01150	55	56	62.088	70	62.998	109.564
KAI37_01151	50	45	49	69	51.002	98.436
KAI37_01152	303	296	354	383.663	423	455
KAI37_01153	18	14	19	11	15	23
KAI37_01154	262	265	420	208	185	205
KAI37_01155	7818.28	8006	8714.21	974	1283	4282.99
KAI37_01156	2269	2176	2699	4828	6022	7731.99
KAI37_01157	292	269	455.141	461	479.494	895
KAI37_01158	61	85	88	82	71.506	137
KAI37_01159	8	4	12	9	11	14
KAI37_01160	8	1.05	2.049	8	6.816	11.216
KAI37_01161	23	29.95	32.951	30.249	22.184	34.496
KAI37_01162	12	10	7	15.471	9.483	25.442
KAI37_01163	21	21	17	21.795	26.517	34.846
KAI37_01164	19	8	14.973	15.865	20	38.827
KAI37_01165	7	8	11.027	9.621	7	14.547
KAI37_01166	30	33	34	23	33.386	44.253
KAI37_01167	39	24	30	25	27.614	37.372
KAI37_01168	22.642	14	24.858	14	12.513	17
KAI37_01169	27.358	26.134	25.421	23	28.487	36
KAI37_01170	28	32.866	28.721	23.907	26	28
KAI37_01171	4	4	2	3.093	17	9.269
KAI37_01172	31	33	42	36	30	54.731
KAI37_01173	76	74	88	51	37	53
KAI37_01174	1793.82	1759	2818.05	1766.3	2054.89	1477.76
KAI37_01175	576.182	594	730	1720.73	1819.2	1619.24
KAI37_01176	2	2	0	3	0	5
KAI37_01177	67	54	86	130	180	225
KAI37_01178	1	3	3	3	0	5
KAI37_01179	2	5	5	2	0	2
KAI37_01180	0	1	0	0	0	0
KAI37_01181	0	0	0	0	0	0
KAI37_01182	5	9	7	2	4	5
KAI37_01183	5	2	3	0	1	1
KAI37_01184	7	8	10	5	1	3
KAI37_01185	4	13	5	4	3	1
KAI37_01186	9	12	15	0	2	7
KAI37_01187	6	10.471	6	4	0	4
KAI37_01188	20.001	20.48	20.986	3	8.294	11
KAI37_01189	39.999	38.049	51.014	8	10.706	11
KAI37_01190	1	2	4	2	0	6
KAI37_01191	19	27	30	43	58.504	54
KAI37_01192	29	21	17	94	138.496	151
KAI37_01193	42	55	77	55	62	43
KAI37_01194	5	4	1	1	0	1
KAI37_01195	6	6	5	1	5	0
KAI37_01196	13	12	17	34	21	19
KAI37_01197	293	306	386	353	387	443
KAI37_01198	4	8	9	1	2	1
KAI37_01199	7	9	6	0	2	2
KAI37_01200	7	12	16	2	3	5
KAI37_01201	4	1	0	1	0	0
KAI37_01202	3	4	12	1	3	3
KAI37_01203	1	1	1	1	0	0
KAI37_01204	4	6	8	2	6	2
KAI37_01205	25	22	21	9	4	10
KAI37_01206	20	17	26	7	11	14
KAI37_01207	28	24	33	13	9	23
KAI37_01208	56	45	52	73	92	127.271
KAI37_01209	1	1	0	0	0	0
KAI37_01210	0	3	1	1	0	1
KAI37_01211	11	7	6	5	5.812	10
KAI37_01212	6	5	9	4	1.188	6
KAI37_01213	5	2	4	3	2	8
KAI37_01214	3	8	18	4	3	7
KAI37_01215	447	384	372	650	660	983
KAI37_01216	21.001	26.999	20	20.216	20	28.001
KAI37_01217	85.696	50.993	74.587	114.173	95.657	92.51
KAI37_01218	64.547	68.008	62.083	90.644	113.123	82.597
KAI37_01219	417.755	444	437.669	306.968	302.22	308.892
KAI37_01220	944	808	1032.7	1067	1119	1396
KAI37_01221	701.997	784.441	1048.65	269.985	287	389
KAI37_01222	341.003	387.559	556.347	196.015	188	257
KAI37_01223	939.946	928.389	1248.72	376.366	408.447	543.322
KAI37_01224	138.02	151.489	175.806	60.47	69.553	108.678
KAI37_01225	95.034	88.123	100	87.163	104	140
KAI37_01226	632.18	561.185	544.101	670.673	737.969	501.528
KAI37_01227	21480.1	18285.6	15670.8	18547.3	20128	13436.6
KAI37_01228	2	0	1	1	0	0
KAI37_01229	1	6	0	0	0	2
KAI37_01230	85	81	93	61	66	76
KAI37_01231	28	17	24	19	21	47
KAI37_01232	2	3	2	1	4	6
KAI37_01233	24	20	30.292	14	12	16
KAI37_01234	112	126	154.708	90	100	196
KAI37_01235	7	4	4	7	8	7
KAI37_01236	307	276	282	611	672	757
KAI37_01237	271	267.036	389	156	146	370
KAI37_01238	48	38	61	24	33	31
KAI37_01239	4	3	7	0	2	0
KAI37_01240	0	0	0	0	0	0
KAI37_01241	111	93	193	65	63	105
KAI37_01242	4	2	4	0	0	0
KAI37_01243	3.734	5	12	1.002	2	1
KAI37_01244	2.266	4	7	0.998	0	3
KAI37_01245	15	15	22	17	8	23
KAI37_01246	137.144	145.166	161.45	18	17	101.325
KAI37_01247	13996.6	14660	17538	729.04	698.465	11886.4
KAI37_01248	21534.4	21565.9	24481	923.079	998.535	20568.1
KAI37_01249	178.779	146.413	124.995	571.002	732.255	399.628
KAI37_01250	85.221	81.587	59.005	125.998	197.745	149.372
KAI37_01251	21	16	16	93	108	74
KAI37_01252	750	727	816	521	595	787
KAI37_01253	840	718	790	11242.1	10547	5528.12
KAI37_01254	3925.17	4076.83	4818.05	4170.99	4062	5207.98
KAI37_01255	94.671	80.553	78.423	171.915	174.384	281.205
KAI37_01256	71.329	48.282	64.577	108.085	139.616	177.795
KAI37_01257	26	18	26	101	86.534	80.284
KAI37_01258	17	7	17	24	18.466	18.716
KAI37_01259	0	3	3	17	18	15.187
KAI37_01260	10	15	13	65	73	50.813
KAI37_01261	113	122	109	205	221	172
KAI37_01262	64	65	89	168	156	137
KAI37_01263	16	19	24	62	27	25
KAI37_01264	3	4	1	11	6	8
KAI37_01265	29	30	21	92	76	45
KAI37_01266	562	530	632	950	759	739
KAI37_01267	794.539	767.775	873.233	735.307	834.374	1447.24
KAI37_01268	993.894	938.225	974.767	677.693	748.626	1036.76
KAI37_01269	1793	1745	1935	1916	2162	2487
KAI37_01270	135	120	136	53	58	85
KAI37_01271	#N/A	#N/A	#N/A	#N/A	#N/A	#N/A
KAI37_01272	0	0	0	2	3	0
KAI37_01273	23	21	29	72	61.838	68.527
KAI37_01274	21	35	27	33	41.162	38.473
KAI37_01275	#N/A	#N/A	#N/A	#N/A	#N/A	#N/A
KAI37_01276	#N/A	#N/A	#N/A	#N/A	#N/A	#N/A
KAI37_01277	0	1	0	0	0	0
KAI37_01278	392	302	292	535	756	834
KAI37_01279	9	10	20	11	15	12
KAI37_01280	17	14	15	16	14	12
KAI37_01281	4	6	11	9	9	10
KAI37_01282	0	2	1	0	0	1
KAI37_01283	160	183	253	59	51	44
KAI37_01284	50	37	26	24	34	35
KAI37_01285	0	0	0	1	0	0
KAI37_01286	166.198	191	135	135	110	103
KAI37_01287	437	375	374.474	212.371	171	149
KAI37_01288	176	190	145.526	69.629	56	46
KAI37_01289	112.213	102.264	155.724	623.666	593.255	633.255
KAI37_01290	47.787	47.736	65.276	81.334	111.745	124.745
KAI37_01291	11	12	13	20.091	16.399	5
KAI37_01292	12	16	16	71.795	79.053	63.426
KAI37_01293	42.377	78	49.636	240.719	245.214	356.192
KAI37_01294	104.623	90	72.364	211.392	224.334	320.382
KAI37_01295	480	447	544.052	1087	963	1416
KAI37_01296	33105.4	34957.8	49624.8	3618	3968.05	7458
KAI37_01297	5	1	2	0	1	2
KAI37_01298	193	217	306	182	154	198
KAI37_01299	242	240	410.026	170	165	123
KAI37_01300	20	23	28	15	14	13
KAI37_01301	48	24	23	33	46	29
KAI37_01302	11916.9	12443.3	17755	597.555	1037.13	1581.64
KAI37_01303	7527.18	7770.48	9865.88	198.402	406.055	756.873
KAI37_01304	13938	14208.3	16838.3	205.034	412.926	1045.88
KAI37_01305	21103.6	21245.7	25459.4	299.009	496.893	1175.9
KAI37_01306	307.09	377.134	614.914	108.019	84.848	150.104
KAI37_01307	45.91	48.866	42.086	36.981	22.152	50.896
KAI37_01308	10	6	12	1	0	1
KAI37_01309	11	9	6	1	3	3
KAI37_01310	4	1	2	2	1	0
KAI37_01311	8	11	4	3	1	2
KAI37_01312	2	2	1	0	0	0
KAI37_01313	0	2	0	0	1	0
KAI37_01314	5	3	11	4	3.485	4
KAI37_01315	1	4	5	2	2.515	3
KAI37_01316	1	1	1	1	4	3
KAI37_01317	29	17	32	34	24	27
KAI37_01318	2.069	7	7	2	6.997	2
KAI37_01319	0	0	0	0	2	3
KAI37_01320	2	1	4	1	12	8
KAI37_01321	19	21	34	27	10	19
KAI37_01322	874.937	780.418	927.547	897.019	1066.45	1654.7
KAI37_01323	956.063	888.582	870.453	1364.98	1566.55	2570.82
KAI37_01324	2465.02	2250.05	2405	5049.89	4900	6882.95
KAI37_01325	155	139	114	207	203	249.585
KAI37_01326	3540	3163.75	2884	3798	4257	6176.94
KAI37_01327	12060.7	10456.3	8928.98	19723.4	22832.6	25150.5
KAI37_01328	386.454	349.148	366.083	825.831	790.867	1565.75
KAI37_01329	152.546	135	159.917	269.359	247.133	509.153
KAI37_01330	882	779	996	169	157	170
KAI37_01331	17	15	13	65	52	66
KAI37_01332	51	50	64	49	53	73
KAI37_01333	327	299	428	403	453	759
KAI37_01334	16	9	8	44	40	51
KAI37_01335	1265.11	1149.01	1400.62	1487	1640.56	1366
KAI37_01336	3084.64	2851	3219.38	2563	3005.44	2895.4
KAI37_01337	98	93.999	107.024	105.1	114.645	119.651
KAI37_01338	100	115.001	101.976	146.9	141.949	170.711
KAI37_01339	39	23	34	71	47.406	76.637
KAI37_01340	2	0	0	0	0	0
KAI37_01341	386.754	339.063	462.443	385.267	328.116	389.314
KAI37_01342	301.246	320.298	330.547	376.728	318.23	455.662
KAI37_01343	327.89	334.639	400.581	245.007	193.779	202.059
KAI37_01344	640.997	673.194	794.827	328.01	295.277	354.13
KAI37_01345	336.111	345.218	384.65	133.307	127.691	160.126
KAI37_01346	258.497	257.945	249.712	116.838	117.232	165.977
KAI37_01347	462.504	486.644	484.241	389.843	383.675	297.876
KAI37_01348	189	164	166	2406	2636	1920
KAI37_01349	12	9	8	11	4	5
KAI37_01350	581	540	693	930	1127	2128.88
KAI37_01351	32	43	40	46	49	90
KAI37_01352	59	71	57	355.896	278	394
KAI37_01353	68	79	121	29	34	68
KAI37_01354	3774.84	3336.44	3345.74	2148.35	2483.65	3372.24
KAI37_01355	321.386	363.557	412.895	136.651	120.346	192.944
KAI37_01356	494	416	388	220	244	383
KAI37_01357	20	17	23	43.722	25	47
KAI37_01358	24	18	24	30.278	38	52
KAI37_01359	24	23	28	30	23	22
KAI37_01360	167	151	287	39	47	45.051
KAI37_01361	1355	1527.05	2789.1	203	195	379
KAI37_01362	5367	4793.99	4145	8515	9618	14591.3
KAI37_01363	21	7	24	37	57	39
KAI37_01364	113	118	150	160	175	159
KAI37_01365	168	181	218	332	295	236
KAI37_01366	827	812.841	1000.17	579.824	604	685.803
KAI37_01367	1454	1362.16	1468.83	1268.18	1319	1405.2
KAI37_01368	18	14	34	32	12	17
KAI37_01369	21	8	15.19	35.535	50.881	40.995
KAI37_01370	23	22	30.81	34.465	39.119	44.005
KAI37_01371	42	41	51	33	22.39	40
KAI37_01372	21	20	21	15	19.61	23
KAI37_01373	1.001	1	2	1	1	3.736
KAI37_01374	5.999	3	7	3	4	3.264
KAI37_01375	5	6	17	5	5	2
KAI37_01376	35	23	36	25	24	27
KAI37_01377	3	3	13	3	6	7
KAI37_01378	0	0	1	0	1	2
KAI37_01379	3	2	2	3	4	6
KAI37_01380	1	1	1	2	0	3
KAI37_01381	2	3	1	7	6	0
KAI37_01382	77	47	55	212	229	152
KAI37_01383	20	16	15	39.046	76	26
KAI37_01384	34	27	39	180.954	214	96
KAI37_01385	81.324	87.305	65.118	174.548	118.996	166.85
KAI37_01386	110.676	110.695	100.882	132.452	150.001	217.15
KAI37_01387	48	62	41	56	74.002	51
KAI37_01388	46	28	41	70	83	62
KAI37_01389	6	4	9	3	6	6.474
KAI37_01390	16	11	11	3	14	11.526
KAI37_01391	11	13	16	8	23	30
KAI37_01392	2	4	0	1	2	1
KAI37_01393	87.6	69.99	80.378	61.294	38.002	54.908
KAI37_01394	106.4	90.01	78.622	68.706	51.998	75.092
KAI37_01395	4	5.799	10	3	2	3.994
KAI37_01396	130.89	108.612	136.741	86.413	110.839	100.374
KAI37_01397	441.11	427.589	380.259	383.271	409.161	405.633
KAI37_01398	46	40	29	64.316	92	102
KAI37_01399	9	6	5	7	13.002	17
KAI37_01400	7	7	7	25	20.998	25
KAI37_01401	31.782	28.926	35	83.623	70.523	68.877
KAI37_01402	57.218	52.074	43	62.377	89.477	62.123
KAI37_01403	7	3	3	2	6	9
KAI37_01404	105	114	178	89	103	164
KAI37_01405	3	1	2	8	9	9
KAI37_01406	3	1	0	10.511	7	13
KAI37_01407	1	0	0	4.489	9	3
KAI37_01408	12	5	5	16	12	20
KAI37_01409	1	2	0	9	9	7
KAI37_01410	0	1	0	0	0	1
KAI37_01411	1	1	1	5	8	10
KAI37_01412	0	0	0	0	0	0
KAI37_01413	17	15	32	37	49	63
KAI37_01414	6195.75	5331.54	4541.68	20226.4	24724.2	24301
KAI37_01415	8711.69	7268.32	6296.16	22833.3	28721.7	25928.6
KAI37_01416	230	225	246	299	316.081	295
KAI37_01417	779.103	693.373	695.005	1876.74	1898.31	2390.52
KAI37_01418	389.926	341.03	355.815	1424.29	1593.69	1381.48
KAI37_01419	151	220.231	240.45	195.742	176.054	238.416
KAI37_01420	217	203.769	277.027	297.258	259.946	417.584
KAI37_01421	16142	14639.4	13298.2	6333	7320	15183.3
KAI37_01422	2849.65	2344.91	2783.06	1783	1853.02	2397.28
KAI37_01423	1283.94	1207.81	1829.62	934.417	996.011	2028.62
KAI37_01424	103.057	84.188	140.219	68.477	91.989	134.382
KAI37_01425	5181.57	5054.76	6821.19	7309.2	6554	11705.4
KAI37_01426	8232.19	8805.87	11944.6	4713.94	4868.24	2929.86
KAI37_01427	3781.03	3662.97	4860.11	3737.46	3453.55	2249.29
KAI37_01428	5538.96	5708.18	6338.1	5617.68	5383.23	3515.96
KAI37_01429	1562.98	1381	1530.91	31721.5	32397.9	17198.2
KAI37_01430	271.693	221.999	255.081	5303.16	4513.82	2585.28
KAI37_01431	124.666	107.205	91.43	2098.03	2142.22	1377.28
KAI37_01432	236.64	255.796	171.574	2717.33	2768.05	1933.51
KAI37_01433	1	0	4	3	4	0
KAI37_01434	0	2	1	0	1	0
KAI37_01435	461	465	454	682	685	581.232
KAI37_01436	128	99	112	143	139	99.768
KAI37_01437	1385	1255	1398	2670.25	2983.93	1572
KAI37_01438	1112.54	1060	1062	838	1181	841
KAI37_01439	410	389	412	264	274	386
KAI37_01440	33656.5	31705.9	33262	11012	16699.1	10752.6
KAI37_01441	1707	1497	1709	1229	2474.59	6508.33
KAI37_01442	5	3.777	5.169	1.001	1	6
KAI37_01443	226	242.223	282.831	189.999	194	342
KAI37_01444	448	482	752.069	689	699	1085
KAI37_01445	0	1	1	0	1	0
KAI37_01446	1	4	3	15	17	7
KAI37_01447	4875.81	4276	3912.28	333	284	246
KAI37_01448	164.605	138.95	131.196	193.057	168.105	151.304
KAI37_01449	1141.76	1087.26	998.804	1331.94	1518.89	1396.71
KAI37_01450	5563.77	5119.19	5546	5431.03	6148.33	6489
KAI37_01451	1	2	4	2	0	0
KAI37_01452	2378.44	2301.99	2893.1	1332.46	1362.01	1729.94
KAI37_01453	148.673	142.842	180.448	89.881	113.991	132.915
KAI37_01454	967.003	908.165	1094.84	442.655	484.009	705.153
KAI37_01455	37	50	39	36	41	50
KAI37_01456	7	6	11	12	7	12
KAI37_01457	2.43	1	2	2	0	2
KAI37_01458	9.57	7	4	8	3	6
KAI37_01459	281.11	295.476	288.292	361.104	397.349	506.786
KAI37_01460	1563.95	1425.52	1514.05	1730.09	1994.6	2122.46
KAI37_01461	179.936	183	170.654	338.803	304.747	358.754
KAI37_01462	99.315	99.996	98.999	173	164.879	179.323
KAI37_01463	279.736	229.054	245.732	274.148	290.046	369.892
KAI37_01464	1185.07	1076.88	1076.73	962.772	908.463	1475.11
KAI37_01465	115.875	119.551	123.622	143.074	120.109	184.641
KAI37_01466	1458	1306.52	1678.92	959.006	974.503	1476
KAI37_01467	114	134	134	403	482.165	257
KAI37_01468	20	15	19	4	10	5
KAI37_01469	4027	4295.41	5375.44	957	1146	1635
KAI37_01470	50	40	57	50	36	62
KAI37_01471	31.351	28	22	42.823	48.196	77.593
KAI37_01472	51.649	44	55	95.177	77.804	82.407
KAI37_01473	4772.05	4221.07	4366.02	8435.91	8284	11636
KAI37_01474	10	9	1	9	3	10
KAI37_01475	4	4	6	9	7.05	18.993
KAI37_01476	3	0	1	7	9.95	13.007
KAI37_01477	64	59	84	79	74	65
KAI37_01478	5	2	8	4	0	5
KAI37_01479	2	1	2	0	0	1
KAI37_01480	27	20	15.04	29	42	60
KAI37_01481	998	806.29	799	3781	3124	5006.1
KAI37_01482	105.989	73.368	101.211	158.561	145.559	171.289
KAI37_01483	233.011	258.632	262.789	480.439	403.515	504.712
KAI37_01484	622	670	844	663	688	832.227
KAI37_01485	102	112	130	39	43	69
KAI37_01486	826	730	777	6838.85	5030	3204
KAI37_01487	618	445	482.93	4210.3	4154	3238.91
KAI37_01488	8	11	10.074	17	32	17
KAI37_01489	2000	1739	1441	2061.92	2490.99	4244.52
KAI37_01490	243.261	246.705	281.807	139.41	160.037	185.17
KAI37_01491	79.739	97.295	123.193	63.59	100.963	81.83
KAI37_01492	41	38	42	158.756	189.254	156.12
KAI37_01493	94	75	82	353.244	354.746	392.88
KAI37_01494	36	51	40	45	47	46
KAI37_01495	46	35	52	44	46	83
KAI37_01496	38	43	59	25	12	31
KAI37_01497	12	2	8	5	2	1
KAI37_01498	2	4	2	1	1	0
KAI37_01499	198.626	184	209	320.063	299	503.001
KAI37_01500	156.914	120	168.767	252.347	255.544	402.416
KAI37_01501	269.761	212.875	303.866	292.905	283.706	422.981
KAI37_01502	110.699	124.125	164.368	64.686	81.75	120.604
KAI37_01503	97	115	114.001	42	27	59.651
KAI37_01504	109.979	111.223	137.999	65	53	77.804
KAI37_01505	129.021	155.777	142	40	56	54.545
KAI37_01506	26	18	29	12	10	23
KAI37_01507	14	21	17.319	16.326	13	18.507
KAI37_01508	38	37	43.681	37.674	42	36.493
KAI37_01509	215	267	338	78	78	127
KAI37_01510	8	4	5	5	2	7
KAI37_01511	1	7.535	5	1	4	2
KAI37_01512	4	4.465	0	0	0	3
KAI37_01513	5	5	2.131	0	4	6
KAI37_01514	5	1	7.869	16	13	16
KAI37_01515	6	7	18	3	4	3
KAI37_01516	11	7	14.876	2	1	3
KAI37_01517	6	2	2.124	2	2	0
KAI37_01518	11	11	15	19	16	22
KAI37_01519	4	0	0	6	5	9
KAI37_01520	5	8	5	6	9.994	7.108
KAI37_01521	2	6	5	3	6.006	13.892
KAI37_01522	16.199	19	33	22	35.179	34
KAI37_01523	30.801	31	57	63	48.821	57
KAI37_01524	11	14.886	17.719	29.66	22.832	39.621
KAI37_01525	18	28.114	24.281	33.34	19.168	50.379
KAI37_01526	218	208	190	531	466	631
KAI37_01527	13	19	9	18	23	16
KAI37_01528	314	378	604	216	192	227
KAI37_01529	955.392	814	811	8366	9163	15982.9
KAI37_01530	283	342	448.603	52.235	74.392	76.325
KAI37_01531	1031	1052	1289.4	417.765	396.608	643.675
KAI37_01532	21	15	29	18	11	23
KAI37_01533	160.999	157.057	181.499	352.963	466.235	297.592
KAI37_01534	61.001	73.943	102.501	56.037	61.709	59.408
KAI37_01535	74	85	109	35	30	32
KAI37_01536	567.825	635	1007	775	1181	1860
KAI37_01537	54.674	51	65.141	152.364	227	175.792
KAI37_01538	72.326	72	115.859	98.636	117	89.208
KAI37_01539	177	178	195.826	1703.28	1526.27	1105.61
KAI37_01540	340	303	329.174	2202.72	1918.03	1963.39
KAI37_01541	339.56	360	530	265	257	427
KAI37_01542	4	4	5	15	7	3
KAI37_01543	316.743	322	429	135	161	247
KAI37_01544	333.257	285	479.487	234.832	286.995	303.067
KAI37_01545	86	77	140.534	117.168	116.005	128.933
KAI37_01546	33	30	40	252	254.936	227.054
KAI37_01547	174	183.849	155	80	73.064	75.946
KAI37_01548	193	186	314	137	114	113
KAI37_01549	161	100	98	794	1065.91	746
KAI37_01550	1	0	0	0	1.822	0
KAI37_01551	1	1	1	8	8.178	4
KAI37_01552	22.931	20	21	15	13.003	2
KAI37_01553	33	34	44	28	32	21
KAI37_01554	1	0	1	1	1	0
KAI37_01555	1	0	0	0	0	1
KAI37_01556	40	53.999	42	109.371	125.621	146
KAI37_01557	26	17.001	20	35.629	61	85
KAI37_01558	5719.02	5758	7305.34	4574.41	4582.28	4436.81
KAI37_01559	1373.32	1415.31	1897.2	1262.85	1637.02	1574.69
KAI37_01560	8185.31	7600.96	9800.32	7417.48	8074.03	9764.31
KAI37_01561	9991.59	9493.16	12108.8	6764.23	7817.85	10079.3
KAI37_01562	2062.32	1817.22	2376.95	1678.32	1807.91	2252.02
KAI37_01563	20598	19229.2	22757.3	20825	24225.5	29520.1
KAI37_01564	91.984	105	98	200	252	271
KAI37_01565	185	162	171	722.199	773	755
KAI37_01566	512	519.536	601.005	301	277.415	322
KAI37_01567	270	287.733	351.832	233.593	208.585	257
KAI37_01568	1044	913.89	1167.49	571.407	618.791	695.244
KAI37_01569	1413	1294.84	1475.01	1041	1125.21	1161.76
KAI37_01570	1	2	1	2.009	0	1
KAI37_01571	2	2	4	2.991	1	4
KAI37_01572	5	1	3	3	1	2
KAI37_01573	6	3	4	2	1	2
KAI37_01574	14.411	14	24	8	13.997	16.412
KAI37_01575	10.589	6	9	4	7.003	6.588
KAI37_01576	210	166	183	460	522	178
KAI37_01577	23	24	51	22	27.68	28
KAI37_01578	14	14	14	6	2.32	2
KAI37_01579	19	25.327	21	11	13	15
KAI37_01580	15	15.673	14	6	10	2
KAI37_01581	5	3	12.813	0	3	1
KAI37_01582	9	5	10.187	4	6	7
KAI37_01583	181.694	238.891	333.859	113.414	105.837	165.656
KAI37_01584	65.306	65.109	85.141	37.586	26.163	30.344
KAI37_01585	876	886	942	229	279	311
KAI37_01586	0	1	4	0	1	0
KAI37_01587	1	4	7	2	0	1
KAI37_01588	2911.16	2897.01	2906.93	1429	1569	2389.06
KAI37_01589	578	544	539	266	242	428.083
KAI37_01590	38.118	31	35	27.826	56.016	42.885
KAI37_01591	521.85	476.43	555.254	541.882	585.766	682.235
KAI37_01592	816.171	747.57	853.856	1955.29	1826.24	1947.88
KAI37_01593	8547.86	7878.22	8789.75	12802.7	13501.6	13214.4
KAI37_01594	41	32	47	71	75	64
KAI37_01595	115	139	158	564.013	278	463
KAI37_01596	27	26.177	35	137.627	56.683	91.671
KAI37_01597	34	33.823	30	153.075	83.897	182.831
KAI37_01598	92	84	95	257.299	172.42	310.498
KAI37_01599	3	12	8	25	26	18
KAI37_01600	113.439	102.44	146.472	86.357	88.82	167.521
KAI37_01601	64.561	60.56	73.528	47.643	51.18	82.479
KAI37_01602	30	25	39	17	6	17
KAI37_01603	8600.52	8703.28	11851.8	6513.01	8970.9	16269.7
KAI37_01604	16165.8	15338.8	17101.3	16321.2	20986.2	33067.5
KAI37_01605	17779	16673.9	17256.2	15292.7	19282.2	32631.4
KAI37_01606	141	168.999	132	369	446	490
KAI37_01607	71	72	118	86	126	99
KAI37_01608	86	67	66	373.181	340.368	446
KAI37_01609	336	326	373	372.819	331.632	642.001
KAI37_01610	5	4	1	3	4	3
KAI37_01611	8	3	9	38	15	45
KAI37_01612	6	5	4	28	22	37
KAI37_01613	2079.21	1919.23	2046.95	1457.94	1587.71	2302.57
KAI37_01614	1720.89	1691.82	1873.82	945.569	1100.91	1630.54
KAI37_01615	452.283	460.162	486.225	417.618	434.444	735.667
KAI37_01616	728.707	671.636	796.06	439.533	453.599	698.613
KAI37_01617	827.969	729.396	798	423.336	446.341	702.611
KAI37_01618	429	364	353.718	250	281	487
KAI37_01619	2528.82	2396	2601.63	994	1028.95	1397
KAI37_01620	0	1	0	0	0	0
KAI37_01621	0	0	0	0	0	0
KAI37_01622	10	16	24	4	4	2
KAI37_01623	43	61	78	20	16	26
KAI37_01624	7	6	8	22.229	23	18
KAI37_01625	4	3	4	8.771	3	6.004
KAI37_01626	1	0	5	3	2	1.996
KAI37_01627	6	9	9	7	7	10
KAI37_01628	101	104.038	146	61	93	133
KAI37_01629	55	64	77	82	48	75
KAI37_01630	57	46	46	43	36	53
KAI37_01631	181	135	190	350	361	372
KAI37_01632	11	7	4	35	33	25
KAI37_01633	15	22	16	26.393	26	24.303
KAI37_01634	87	72	150	91.228	126.831	127.697
KAI37_01635	38	53	68	54.379	64.169	92
KAI37_01636	287	266	319	156	187	173
KAI37_01637	7	6	5	8	8	7
KAI37_01638	142.709	142.345	134.353	218.364	205.529	307.716
KAI37_01639	458.827	371.494	426.466	690.25	671.3	892.324
KAI37_01640	2338.46	1981.87	1941.21	3698.3	3860.17	8242.68
KAI37_01641	47	45	48	60	49	57
KAI37_01642	248.524	197.131	253.775	95.753	98.542	160.945
KAI37_01643	372.476	334.869	333.225	100.247	134.458	224.055
KAI37_01644	1131.92	1074	1530	464	484	686.013
KAI37_01645	35.661	30.236	28	33.506	27	23
KAI37_01646	129.339	94.726	59	73.494	76.995	107
KAI37_01647	226	215.038	181	113	122.005	211.959
KAI37_01648	87	86	92	151	226	160
KAI37_01649	165	158	144	77	63	94
KAI37_01650	425	343	313	91	113	164
KAI37_01651	78	73	96	86	94	113.254
KAI37_01652	934	748	681	971.005	984	941.746
KAI37_01653	1	1	0	0	0	1
KAI37_01654	0	0	0	0	0	0
KAI37_01655	14	9	18	11	19	8
KAI37_01656	13	17	12	8	9	12
KAI37_01657	4.535	7.476	14	7	11.877	9.412
KAI37_01658	3.465	2.524	7	4	1.123	7.588
KAI37_01659	2	6	7	11	10	19
KAI37_01660	11	5	6	8	13	16
KAI37_01661	139.993	120	216.394	96.727	62	178
KAI37_01662	122.009	105	122.606	56.273	60	109.813
KAI37_01663	151.472	124	132	129	115	151.187
KAI37_01664	0	0	0	0	0	0
KAI37_01665	2	0	5	2	0	1
KAI37_01666	0	2	3	6	16	4
KAI37_01667	28	19	13	96	82	129
KAI37_01668	0	0	0	0	0	0
KAI37_01669	111	114	168	28	30	38
KAI37_01670	13	11	12	247	180	61
KAI37_01671	25	25	26	8	8.996	10
KAI37_01672	40	24	41	123	102.005	68
KAI37_01673	30	26	30	94	86.999	75
KAI37_01674	3068	2363	1860.06	5887.18	7339	5528.71
KAI37_01675	17	8	7	21.818	21	19
KAI37_01676	475.367	369.257	437.824	3374.89	3313.15	1678.69
KAI37_01677	389.633	366.493	336.176	7058.63	6249.2	3246.69
KAI37_01678	8	4	14	73	85.003	61.008
KAI37_01679	10	5	8	32	32	20
KAI37_01680	20.419	16.413	41.721	52	58	35
KAI37_01681	20.581	21.587	35.279	73	63	56
KAI37_01682	76	57	100	57	41	70
KAI37_01683	238	250	226	222	209	316
KAI37_01684	90.698	71.586	81.003	76.617	55.85	85.326
KAI37_01685	772.302	694.414	671.997	403.42	427.15	523.674
KAI37_01686	453.515	413.024	332.735	275.62	262.994	318.554
KAI37_01687	264.485	243.338	246.211	213.779	198	252.446
KAI37_01688	256.314	227.638	258.054	198.641	234.006	259
KAI37_01689	645.703	549	487.796	2973.32	3107.01	4626.47
KAI37_01690	104.15	81.843	54.786	553.27	557.662	797.595
KAI37_01691	218.839	155.847	169.403	938.762	993.93	1599.03
KAI37_01692	405.552	344.905	297.465	2183.59	2336.2	3335.74
KAI37_01693	306.441	264.405	245.549	1644.02	1639.54	2443.67
KAI37_01694	618	565.001	619	2452	2491.05	4043
KAI37_01695	1707	1461	1658	2270	2426.15	2177.41
KAI37_01696	0	0	0	0	0	0
KAI37_01697	851	856	964.837	1050	1249	1958.95
KAI37_01698	634	604	661.163	916	971.995	1577.06
KAI37_01699	3	0	0	0	3	5
KAI37_01700	335	354	345	293	302	427.005
KAI37_01701	1044	1010	1424	1045	1409	2475.18
KAI37_01702	1	2	1.145	0	0	0
KAI37_01703	18	16	14.855	0	2	4
KAI37_01704	5588.28	5523	6346.02	6651.68	7601	19865.6
KAI37_01705	2	5	3	1	1	1
KAI37_01706	108.912	97.282	126.749	56.762	75.114	65.846
KAI37_01707	207.665	215.866	234.535	154.282	188.292	107.39
KAI37_01708	432.852	409.129	482.918	323.372	383.076	239.648
KAI37_01709	259.571	233.55	259.798	194.583	234.542	196.086
KAI37_01710	204	194	259	141	127.976	183.03
KAI37_01711	12	10	17	2	3	12
KAI37_01712	40	56	83	22	24	42
KAI37_01713	492.381	444.482	742.702	344.515	306.082	327.372
KAI37_01714	419.11	432.495	660.281	301.272	386.295	376.141
KAI37_01715	798.759	862.023	1025.02	536.213	559.623	601.488
KAI37_01716	1717.92	1912	3184.97	2102	1641.04	1995
KAI37_01717	320	368	518	444	380	308
KAI37_01718	244	254	329.257	120	98	119
KAI37_01719	72	73	113	153	109	134
KAI37_01720	446.51	397.026	472.474	112.934	143.389	152.566
KAI37_01721	932.763	944.034	1020.57	311.652	284.379	270.443
KAI37_01722	2457.8	2308.94	2208.87	644.414	575.233	612.991
KAI37_01723	43	39	43	85	80.376	63.448
KAI37_01724	11	17	18.99	54.99	38.624	29.682
KAI37_01725	54	64	50.01	130.01	130	125.871
KAI37_01726	181	180.313	228	164	161.483	176.465
KAI37_01727	150	151.687	179	96	101.517	141.535
KAI37_01728	1206	1078	1372	886.001	920	1427
KAI37_01729	47	38	51	58	50	59
KAI37_01730	13	19	16	46.159	28.046	32
KAI37_01731	654.931	659.75	927.402	668.841	831.154	815.916
KAI37_01732	119.069	117.25	182.596	84.003	92.8	149.959
KAI37_01733	2339.06	2010.86	1653	5444.53	5934.37	8379.21
KAI37_01734	74.929	70.511	63.799	157.466	149.613	207.07
KAI37_01735	53.088	55.489	39.202	85.011	117.029	247.867
KAI37_01736	539	556	811	556	405	424
KAI37_01737	52	54	55	75	81	120
KAI37_01738	2980.32	2998.62	4080.79	2121.2	2332.24	3747.47
KAI37_01739	7771.58	7295.53	8162.25	5402.94	6671.01	7573.5
KAI37_01740	74.995	68.95	66.34	127.865	119.315	140.033
KAI37_01741	62	76	77	115	109	140
KAI37_01742	321	330	352	525	447	732
KAI37_01743	420	407.003	687.969	1216.98	929.113	1070.83
KAI37_01744	76	83	143	140	144.111	197.002
KAI37_01745	8789	8467.66	10901.2	15090.3	15251.9	17740.7
KAI37_01746	1300	1232.96	1359	877.492	1133	1166.2
KAI37_01747	515	516	620	354.131	368.639	542.674
KAI37_01748	2089.84	1702	1377	2947.01	3610	3359
KAI37_01749	633.408	663.473	908.641	560.19	600.714	1104.04
KAI37_01750	742.592	750.527	1013.36	827.81	928.286	1340.09
KAI37_01751	2221.18	2274.63	3245.43	1348.09	1614.64	2812.23
KAI37_01752	375.821	354.368	630.958	279.148	342.359	585.605
KAI37_01753	54	44	62.994	56	81	112
KAI37_01754	86	97.625	119.006	50	34.513	70
KAI37_01755	31	29.375	34	21	26.487	53
KAI37_01756	14	12	13	6	3	9
KAI37_01757	810	819.001	1015.01	1133	1238	1738
KAI37_01758	414.004	401	500	207	216	296
KAI37_01759	1071	1130.85	1356	925	843.768	949
KAI37_01760	949	1003	1585	500	634	696
KAI37_01761	138	132	161	78	58	116
KAI37_01762	1102.98	1095.66	1327.98	501.363	554.372	476
KAI37_01763	938.278	993.794	1040.02	518.584	545.316	495.918
KAI37_01764	2066.74	2084.91	2136.12	799.519	874.684	924.204
KAI37_01765	445	366	336.991	294	381	311
KAI37_01766	253	261.443	346	109	97.165	94.238
KAI37_01767	101	96.557	126	66	51.835	66.762
KAI37_01768	54	59	115	86	84	103
KAI37_01769	157	145	147	235.989	229	252
KAI37_01770	4	2	2	2.011	4	2
KAI37_01771	87	92	95	72	77	120
KAI37_01772	388.033	363.014	461.813	733.276	999.25	828.387
KAI37_01773	26078.1	27061.2	28860.2	14868.5	16115.7	21655.1
KAI37_01774	51.274	56.562	57	41	38	44.704
KAI37_01775	173.726	158.438	240	77	61	62.296
KAI37_01776	4130.11	3512	4089.89	1336	997	1036
KAI37_01777	0	0	0	0	0	0
KAI37_01778	144	112	120	90	83	61
KAI37_01779	18	31	22	4	15	10
KAI37_01780	1	3	4	1	0	0
KAI37_01781	0	0	0	0	0	0
KAI37_01782	12	2	7	13	13	6
KAI37_01783	9	11	13	5	10.658	10
KAI37_01784	13	5	14	18	21.342	19
KAI37_01785	14	13	7	27	21	21
KAI37_01786	582.001	620.001	1029	526	471	624
KAI37_01787	5	7	3	22	23	29
KAI37_01788	21	20	28	44	66	42
KAI37_01789	22	26	28	23	26	25
KAI37_01790	12	9	15	38	32	41
KAI37_01791	27	21	31	12	12	28.406
KAI37_01792	15	8	19	0	5	9.09
KAI37_01793	42	27.445	66	34.673	33.434	27.504
KAI37_01794	44	37.555	41	41.327	47.566	44
KAI37_01795	20	21	35	43	27	32
KAI37_01796	89.605	89.379	65.482	52.664	65.623	101.295
KAI37_01797	59.396	61.621	59.518	47.336	34.377	100.705
KAI37_01798	167	135	127	98	140	147
KAI37_01799	16924.6	13839.4	12539.2	6903.24	6759.37	11028.4
KAI37_01800	3171.82	2554.35	2505.98	831.766	1000.61	1448.46
KAI37_01801	3944.79	3258.65	2896.64	803.971	879.667	1463.84
KAI37_01802	5555.33	4785.76	4285.21	1133.98	1110.94	1511.77
KAI37_01803	4559.08	3516	2729.76	519.041	536.44	553.068
KAI37_01804	9	9	5	3	2	4
KAI37_01805	52	48	66	33	25.939	39
KAI37_01806	915	839.985	712	1663	1644.06	2837
KAI37_01807	4	9	1	16.409	13	20.277
KAI37_01808	4	4	11	34.591	30.88	47.699
KAI37_01809	46	39	46	80	95.12	120.024
KAI37_01810	17	30	46	60	46	65
KAI37_01811	22	15	10	62	51	81
KAI37_01812	369	300	289	709	749	539
KAI37_01813	4547.86	3546.15	2755	6835.9	8101.82	7445.28
KAI37_01814	37.142	40.095	32.101	43.096	48.35	27.335
KAI37_01815	0	1	0	0	1	2
KAI37_01816	13	9	10	13.404	6	8
KAI37_01817	39	20	32	22.596	23	25
KAI37_01818	269	259.989	191	3783	3584.87	5740.01
KAI37_01819	53	36	40	76	106	85
KAI37_01820	126	110	98	334	401	628.015
KAI37_01821	70	70	55	174	156	213
KAI37_01822	2	2	4	2	4	7.378
KAI37_01823	5	11	15	13	17	16.622
KAI37_01824	31	30	32	132	98	140.724
KAI37_01825	10.994	16	12	40	42	55.01
KAI37_01826	13.006	21	28	38	49	58.266
KAI37_01827	32.654	44	36	92	68.214	100
KAI37_01828	161.346	140	200	210	249.786	333
KAI37_01829	49	38	49	72.001	88.083	79.05
KAI37_01830	14.999	7	15.172	41.998	36.917	44.483
KAI37_01831	36.001	35	31.828	58.001	85	126.467
KAI37_01832	8	13	11	28	16	24
KAI37_01833	6	21	12	65	51	41
KAI37_01834	150	141	211	88	80	92
KAI37_01835	617	643	1030	148	146	212
KAI37_01836	1165	1419	1894	399	459	595
KAI37_01837	0	0	0	0	1	0
KAI37_01838	13	3	11	54	53	73
KAI37_01839	15	25	27	89.25	72	63.096
KAI37_01840	118	113	103	290.75	264	339.904
KAI37_01841	290	274	311	126	119	178.014
KAI37_01842	35	42	35	178	187	147
KAI37_01843	684	725	1147	126	143	181
KAI37_01844	234	257	236	94	122	219
KAI37_01845	57	71	72	123	121	128
KAI37_01846	41.003	43.002	45	458.635	397.151	157.004
KAI37_01847	45.997	32.998	47	159.365	113.849	85.996
KAI37_01848	67	80.104	64	121.173	113.068	104
KAI37_01849	28	13.896	31	29.827	34.932	21
KAI37_01850	178449	165770	159262	54210	59772.7	58471.3
KAI37_01851	239.562	215.15	360.978	258.822	239.654	355.643
KAI37_01852	362.438	346.85	501.022	358.178	265.346	430.357
KAI37_01853	485	526	526.023	846	747.302	663.216
KAI37_01854	2519	2249	2320.95	5793.4	6346.85	4918.07
KAI37_01855	1662	1726	2032	7672.98	6909.85	4772.75
KAI37_01856	11	15	19	12	22.473	21
KAI37_01857	35.348	44.125	51.422	91.523	101.649	64.566
KAI37_01858	27.652	20.875	36.578	52.477	65.878	43.434
KAI37_01859	357	362	354	535	624.317	835
KAI37_01860	539	558.797	603.072	132.589	159.489	277.58
KAI37_01861	271	256.733	322.026	236.408	231.581	396.66
KAI37_01862	175.321	171.77	193.376	225.517	226.504	385.114
KAI37_01863	105.161	102.7	123.597	126.169	123.176	184.276
KAI37_01864	80.519	56	77.42	62.946	55.392	93.804
KAI37_01865	261	241	291.58	149.371	155	188.566
KAI37_01866	290	289	522	207	157	153
KAI37_01867	2	1	2	8	9	5
KAI37_01868	2	2	0	3	12	8
KAI37_01869	32	29	45	62	43	21
KAI37_01870	123	112	133	149	102	125.004
KAI37_01871	196	189	252	140	207	211
KAI37_01872	120	133	176	109	114	131
KAI37_01873	43	25	44.638	150.004	138	144
KAI37_01874	25	46	63.362	139.996	127	141
KAI37_01875	4	3	4	26	52.476	26
KAI37_01876	22	30	44	65	56.524	77
KAI37_01877	20	18	17	54	36.634	40
KAI37_01878	67	48	79	121	99.366	69
KAI37_01879	6	8	6	3	0	2
KAI37_01880	339	327.522	331	203	166.999	234.643
KAI37_01881	609	576.478	593	300	304.001	397.357
KAI37_01882	21	31	26	26	11	37
KAI37_01883	2769	2942	4942.22	1389	1233	1571
KAI37_01884	4	6.023	13	1	3	3
KAI37_01885	129.69	145.65	308.546	85.476	106.711	172.718
KAI37_01886	36.31	48.328	67.454	77.524	72.289	88.282
KAI37_01887	4	2	6	131	110	65
KAI37_01888	45	64	109	39	47.972	54
KAI37_01889	80	71	103	85	60.028	68
KAI37_01890	39	35	63	26	21	41
KAI37_01891	234.987	256	314	204	186	244
KAI37_01892	63	79	82	53	58	99
KAI37_01893	3795.01	4261.02	5977.23	1308	1250.01	1701.67
KAI37_01894	1084	1147	1091.78	4630	3834	2155.33
KAI37_01895	121.448	121.131	106.994	45.992	55.901	115
KAI37_01896	1107.52	1082.37	1133.29	401.875	365.74	946.855
KAI37_01897	1743.7	1659.76	1727.71	703.236	750.55	1984.62
KAI37_01898	2877.58	2821.09	2750.25	1110.92	1178.45	3223.02
KAI37_01899	2897.8	2728.26	2588.83	1385.78	1763.12	5144.69
KAI37_01900	2622.27	2684.64	2445.1	6858.22	6950.32	8655.85
KAI37_01901	2601.81	2734.04	3978.98	1532.29	1802.22	2551.4
KAI37_01902	925.708	948.968	1293.84	874.865	974.778	1690.66
KAI37_01903	2033.18	2112.24	2676.44	1572.84	1673.67	2175.25
KAI37_01904	917.52	885.755	1083.13	1019.58	1096.9	1439.99
KAI37_01905	2176.48	2130	2592.52	1219.59	1480.45	2149.82
KAI37_01906	56.849	52.347	44.827	80.274	120	170.64
KAI37_01907	873.047	771.66	764.921	1578.89	1496.8	1918.35
KAI37_01908	2383.75	2114.28	1855.53	4830.76	5026	4242.95
KAI37_01909	683.354	600.713	455.81	1065.08	1393.2	1010.16
KAI37_01910	30.8	42.16	52.131	26.91	18	25.003
KAI37_01911	105.2	94.84	159.869	76.09	69	58
KAI37_01912	32910.3	30723.3	31204.8	10632	11458.4	7812.93
KAI37_01913	56.999	51	47	99.23	91.414	70.333
KAI37_01914	337.001	299	330	620.77	551.586	395.667
KAI37_01915	4	5	4	18	10	11
KAI37_01916	2178.03	2316.73	2577.59	1282.09	1625.51	1572.37
KAI37_01917	134.407	131.178	152.573	94.915	133.323	141.801
KAI37_01918	497.283	477.633	541.862	273.001	293.847	354.39
KAI37_01919	672.255	695.925	814.296	469	720.324	845.38
KAI37_01920	23	22	27	19	19	31
KAI37_01921	457	365	337	125	105	103
KAI37_01922	1693	1815	2341.87	322	414	701
KAI37_01923	1924.1	1709.69	1766.99	6018.13	7062.64	3815.26
KAI37_01924	3476.22	2884.31	2762.01	10736.9	12630.9	8380.85
KAI37_01925	2013	2060.16	2850.01	649	696	1113.02
KAI37_01926	2781.93	2883.57	3561.09	3277.57	3418.18	5426.05
KAI37_01927	2490.39	2428.67	2667.72	3138.4	3491.98	6840
KAI37_01928	1760.97	1661.47	1818.29	1940.52	2175.77	3795.63
KAI37_01929	11569.7	10021.5	9862.9	10023.9	12609.2	22199.4
KAI37_01930	309.114	318.173	381.785	819.389	1133.76	1462.33
KAI37_01931	229.55	217.216	312.839	638.453	811.836	946.937
KAI37_01932	353.57	339.243	388.411	752.053	925.037	930.308
KAI37_01933	988.602	947.774	1127.66	3598.87	3478.58	4223.43
KAI37_01934	610.148	585.718	672.113	2586.32	2326.95	3034.56
KAI37_01935	732.507	670.428	713.126	2520.4	2212.27	2773.92
KAI37_01936	832.885	836.25	914.398	3625.16	3304.41	3934.75
KAI37_01937	259.906	235.199	237.662	912.556	869.088	1168.99
KAI37_01938	1029.21	980.966	1025.89	2711.73	2585.66	3065.94
KAI37_01939	3784.44	3569.81	4005.69	7692.44	8155.5	9357.35
KAI37_01940	595.944	608.47	677.858	1086.57	1238.36	1716.86
KAI37_01941	272.065	232.132	347.11	466.237	556.731	772.691
KAI37_01942	1255.11	1135.26	1283.05	2136.91	2252.62	2617.83
KAI37_01943	59.427	79.36	63.318	458.592	534.462	434.385
KAI37_01944	485.124	391.881	410.745	1175.2	1391.16	1271.23
KAI37_01945	924.002	918.005	919.993	2899.31	3214.6	2997.85
KAI37_01946	1839.47	1690.31	1665.72	5946.26	6208.03	6224.06
KAI37_01947	1619.47	1699.26	2212.3	1200.98	1365.92	1830.06
KAI37_01948	600.588	563.194	678.791	1285.43	1390.02	1392.4
KAI37_01949	289.226	264.929	304.134	717.774	818.242	909.602
KAI37_01950	56.987	56.475	46.73	172.617	162.996	171.686
KAI37_01951	61	72.469	60.443	268.218	283.641	349.508
KAI37_01952	136	134.569	176.557	494.836	441.504	436.841
KAI37_01953	505.831	461.984	503.962	1788.19	1762.95	1746.22
KAI37_01954	431.169	404.495	451.58	1574.75	1660.45	1737.47
KAI37_01955	596.556	589.365	815.538	710.083	710.241	612.257
KAI37_01956	4235.97	4482.13	5804.88	3644.49	4130	3951.93
KAI37_01957	5972.98	5606.07	6291.48	5185.49	6277.66	6300.9
KAI37_01958	1653.15	1628.11	1624.17	1278.3	1647.25	1563.5
KAI37_01959	986.594	963.575	1034.41	1232.42	1545.56	1810.83
KAI37_01960	1106.62	1113.21	1336.03	1199.77	1459.83	1513
KAI37_01961	938.12	925.392	1151.27	1057.35	1237.08	1293.11
KAI37_01962	1501.46	1448.23	1735.11	1611.32	2039.98	2567.6
KAI37_01963	2747.75	2640.86	3028.39	3165.69	3747.55	4065.33
KAI37_01964	1607.67	1534.98	1783.07	1120.08	1363.34	1728.25
KAI37_01965	1277.69	1254.63	1359.3	1131.83	1355.44	1899.69
KAI37_01966	2290.8	2245.04	2372.01	1780.78	2071.06	3105.7
KAI37_01967	15355.8	14234.3	14575.5	15447.7	16766.2	12978.8
KAI37_01968	11226.2	10151.2	10856.3	14252.2	14413.7	10498.6
KAI37_01969	1167.77	1081.05	1062.14	2636.65	3110.59	2395.83
KAI37_01970	1298.23	1138.93	1008.18	3086.93	3290.2	2584.66
KAI37_01971	175.737	211.188	216.223	399.379	432.107	410.318
KAI37_01972	158.974	140.91	173.518	347.569	355.762	234.806
KAI37_01973	224.278	198.044	247.374	280.052	299.154	203
KAI37_01974	1495.39	1547.04	2292.49	2020.81	2101.3	2115.47
KAI37_01975	2964.6	2875.92	4038.38	3772.62	4140.83	4319.53
KAI37_01976	1882	1855	2074	1502	1925	3111.03
KAI37_01977	127.19	103	139	94.005	95	95.086
KAI37_01978	1090.82	1071.45	1291.35	903.295	844.323	907.542
KAI37_01979	368.048	342.088	401.361	255.129	238.656	385.54
KAI37_01980	705.541	682.376	735.498	400.904	432.178	555.055
KAI37_01981	20972.6	20019.9	21510.7	12960.8	14521.2	18442.5
KAI37_01982	1293.49	1125.8	1067.54	708.87	782.135	1050.19
KAI37_01983	432.143	422.052	555.542	380.046	319.549	438.148
KAI37_01984	302.756	281.31	352.631	333.48	349.431	402.401
KAI37_01985	432.244	374.69	488.042	783.545	841.34	922.373
KAI37_01986	6288.95	6601.39	7964.46	2957.97	2682.23	3397.23
KAI37_01987	1826	1811	2311.74	6818.98	6847	5027.03
KAI37_01988	16	14	21	11	12	12.321
KAI37_01989	231.098	207.12	243.138	520.571	596.079	448.761
KAI37_01990	135.902	143.88	147.862	382.429	406.921	382.918
KAI37_01991	45.019	56.933	80.229	38.223	30.984	45.355
KAI37_01992	231.981	220.067	370.771	160.777	176.016	259.645
KAI37_01993	1153.8	1023.15	1075.88	1591.66	1776.96	1609.46
KAI37_01994	1121.1	1110.24	1081.05	1744.44	1856.4	2398.92
KAI37_01995	2385.1	2083.61	2118.38	2127.89	2414.51	3448.66
KAI37_01996	6821	6902	9192.99	17119.5	15948	13647
KAI37_01997	76	70	84.102	39	37	56
KAI37_01998	9	6	11.898	3	3	3
[truncated: 3,308 more rows]
